# Supplementary material for: The evolution of gene regulatory networks controlling Arabidopsis thaliana L. trichome development
Source: PubMed Central journal article supplement (PMC6393967; doi:10.1186/s12870-019-1640-2), 2019-02-15

**Figure S55.** PhyML phylogenetic relations and composition of domains for AT5G20570 homologues of representative plant species. The color legends of species and domains is given below

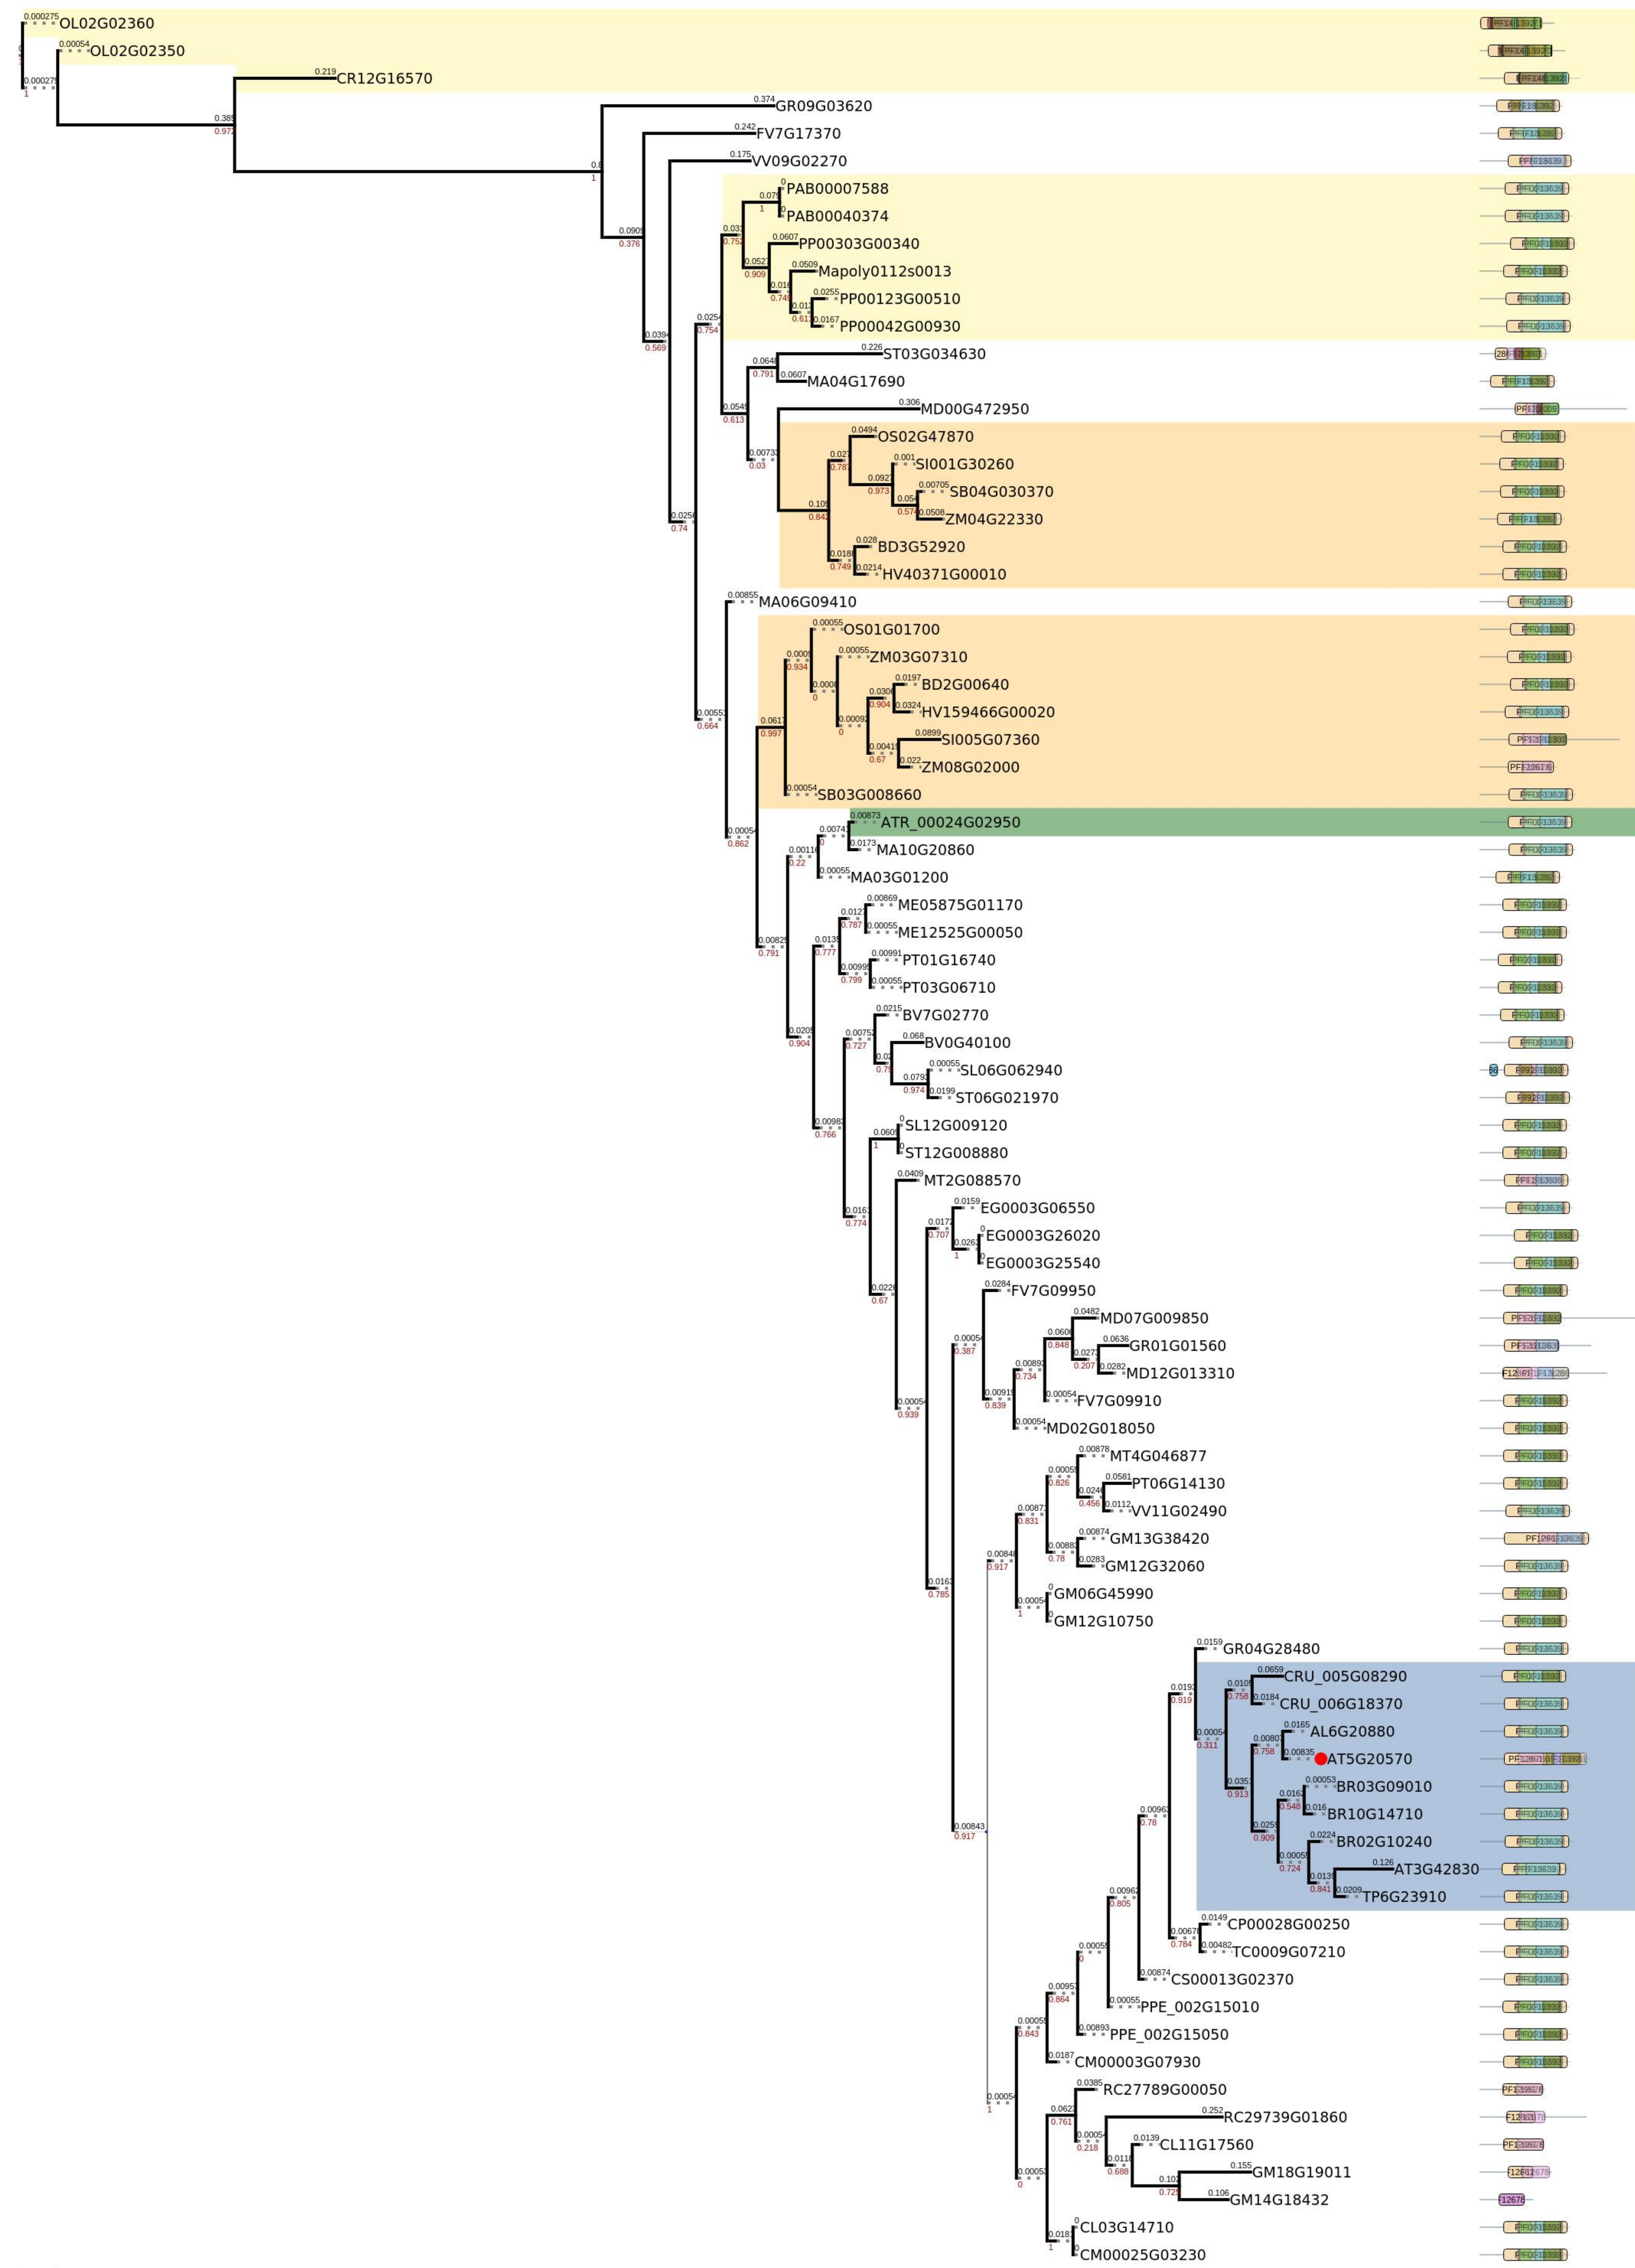

**taxonpmic identity of protein**

**domain architecture**

|                             |                                                                |  |                                   |  |
|-----------------------------|----------------------------------------------------------------|--|-----------------------------------|--|
| <b>Poaceae</b>              | Prokaryotic_RING_finger_family_4_PF14447_5                     |  | Ring_finger_domain_PF13639_5      |  |
| <b>Brassicales</b>          | Anaphase_promoting_complex_subunit_11_RING_H2_finger_PF12861_6 |  | zinc_RING_finger_domain_PF14634_5 |  |
|                             | Zinc_finger_C3HC4_type_RING_finger_PF00097_24                  |  | RING_type_zinc_finger_PF13445_5   |  |
|                             | Zinc_finger_C3HC4_type_RING_finger_PF13923_5                   |  | Zinc_ribbon_C4HC2_type_PF17120_4  |  |
| <b>Out group</b>            | Zinc_finger_C3HC4_type_RING_finger_PF13920_5                   |  |                                   |  |
|                             | zinc_finger_of_C3HC4_type_RING_PF15227_5                       |  |                                   |  |
| <b>Amborella trichopoda</b> | RING_H2_zinc_finger_domain_PF12678_6                           |  |                                   |  |
|                             | RING_like_zinc_finger_PF17123_4                                |  |                                   |  |



**Figure S56.** PhyML phylogenetic relations and composition of domains for AT2G36010, AT1G47870, AT5G22220 homologues of representative plant species. The color legends of species and domains is given below

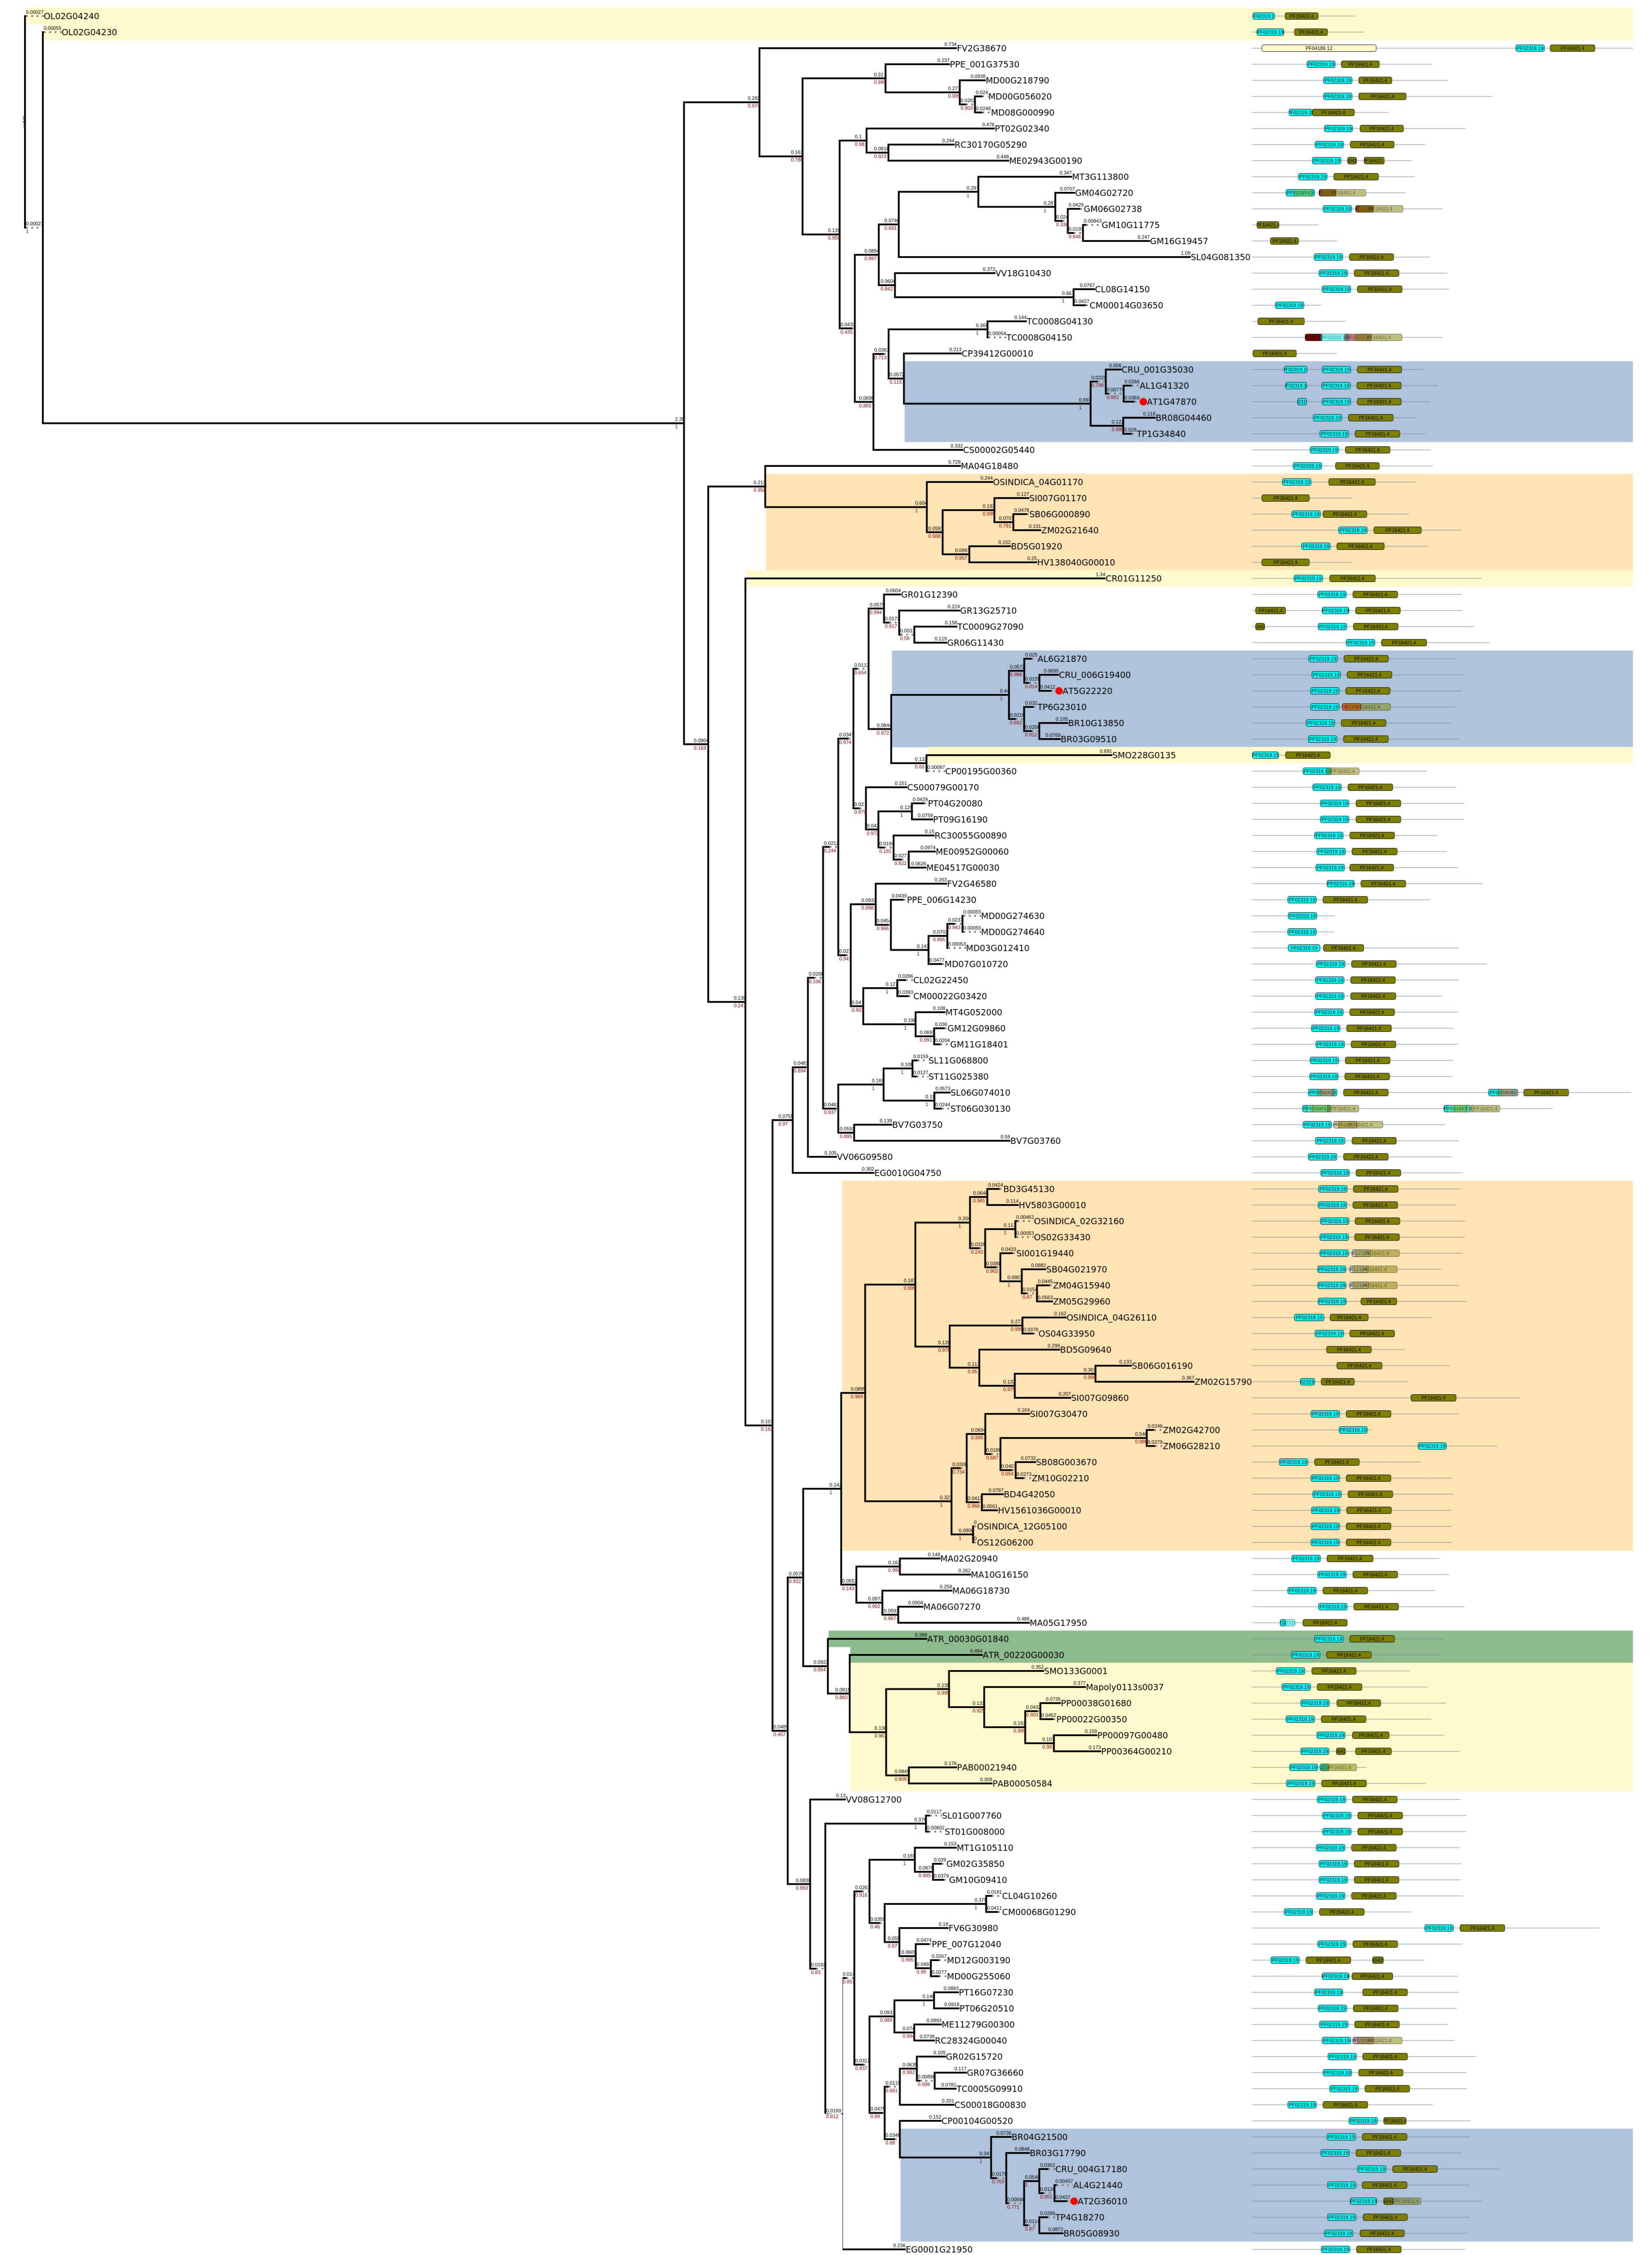

taxonomic identity of protein

| Species              | Domain Architecture                                      |
|----------------------|----------------------------------------------------------|
| Poaceae              | E2F_transcription_factor_CC_MB_domain_Pf16421_4          |
| Brassicales          | E2F_DP_family_winged_helix_DNA_binding_domain_Pf02319_19 |
| Out group            | Gcd10p_family_Pf04189_12                                 |
| Amborella trichopoda | Synaptonemal_complex_central_element_protein_1_Pf15233_5 |
|                      | Sugar_specific_transcriptional_regulator_TrmB_Pf01978_18 |
|                      | Double_strand_recombination_repair_protein_Pf10376_8     |
|                      | Cell_division_protein_ZapB_Pf06005_11                    |
|                      | B_block_binding_subunit_of_TFIIC_Pf04182_11              |

domain architecture

|                                                                |            |
|----------------------------------------------------------------|------------|
| Uncharacterized_protein_conserved_in_archaea_DUF2250_Pf10007_8 | PS1007_8   |
| DivIVA_protein_Pf05103_12                                      | PF05103_12 |
| TATA_element_modulatory_factor_1_DNA_binding_Pf12329_7         | PF12329_7  |
| Leucine_zipper_Pf15294_5                                       | PF15294_5  |



Figure S57. PhyML phylogenetic relations and composition of domains for AT5G24310, AT5G42030, AT2G46225 homologues of representative plant species. The color legends of species and domains is given below

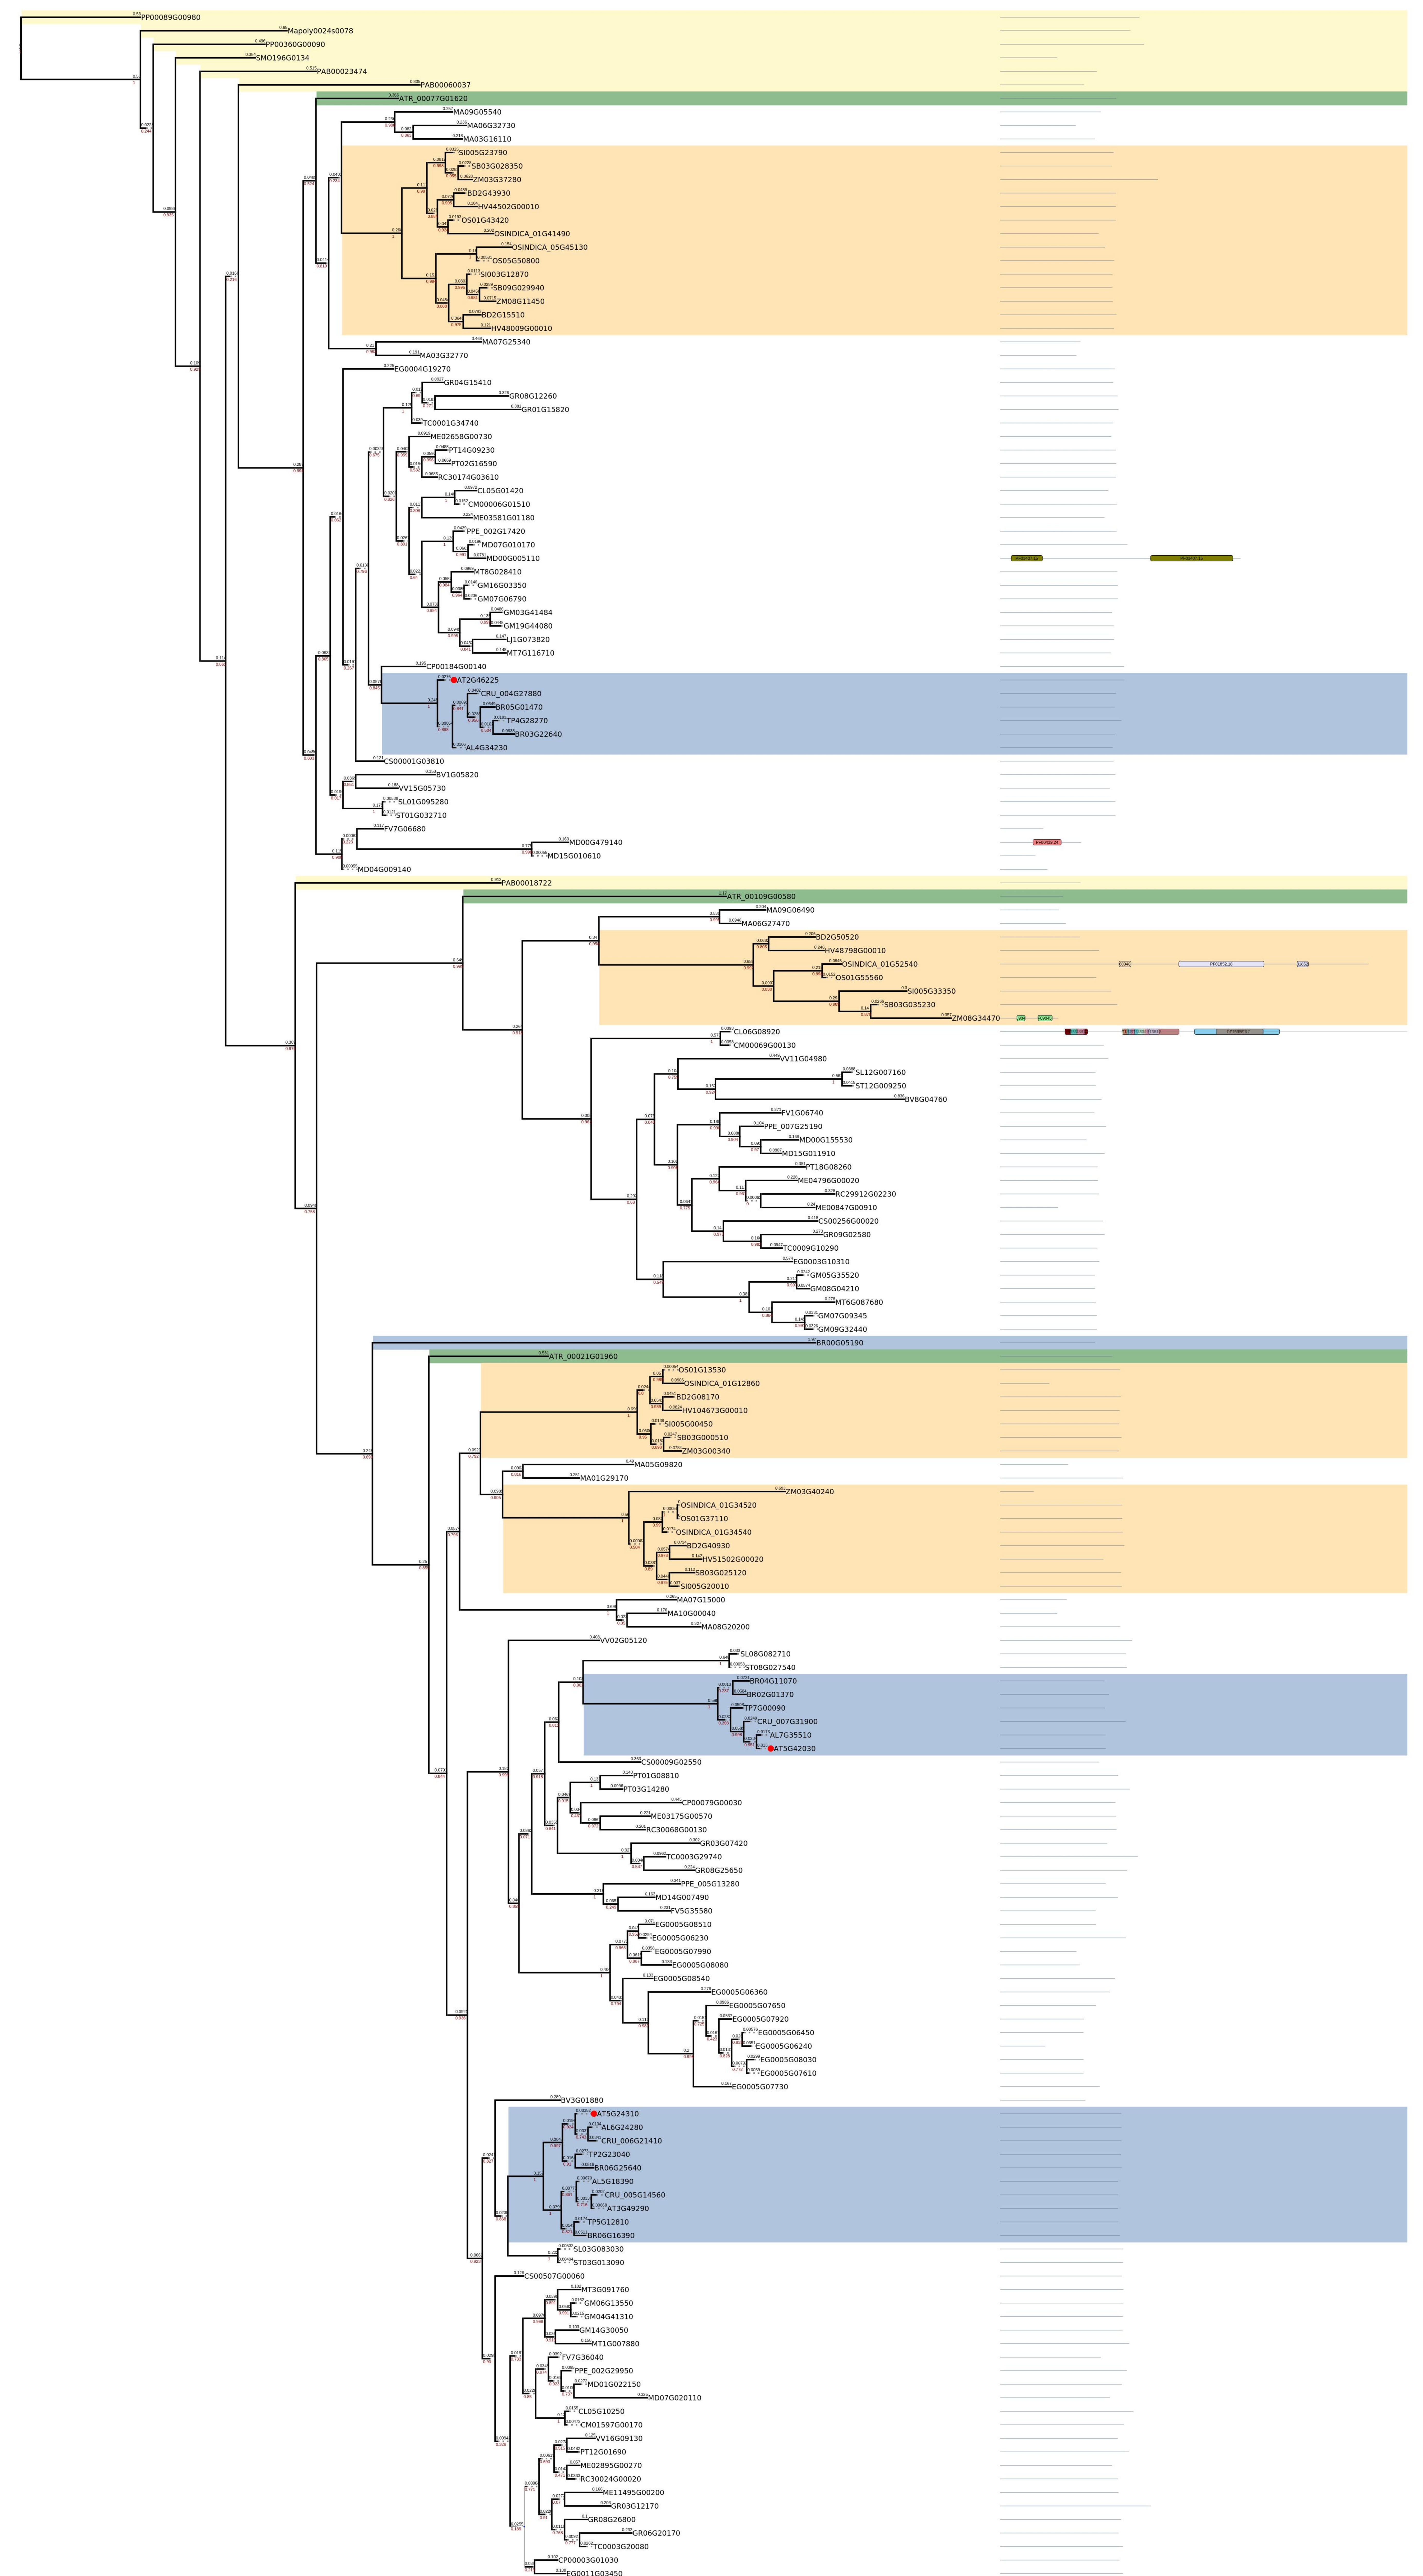

0.000333

**taxonomic identity of protein**

- Poaceae
- Brassicales
- Out group
- Amborella trichopoda

**domain architecture**

- Nucleotide\_diphospho\_sugar\_transferase\_PFO3407\_15
- Bromodomain\_PFO0439\_24
- Homeobox\_domain\_PFO0046\_28
- START\_domain\_PFO1852\_18
- L27\_2\_PFO9045\_9
- PPR\_repeat\_PFO1535\_19
- PPR\_repeat\_family\_PFI3041\_5
- Pentatricopeptide\_repeat\_domain\_PFI1812\_5
- Pentatricopeptide\_repeat\_region\_of\_PRORP\_PFI1717\_3
- Protein\_only\_RNase\_P\_PFI6953\_4
- Zchh12a\_like\_Ribonuclease\_NYH\_domain\_PFI1977\_7



**Figure S58.** PhyML phylogenetic relations and composition of domains for AT5G28646 homologues of representative plant species. The color legends of species and domains is given below

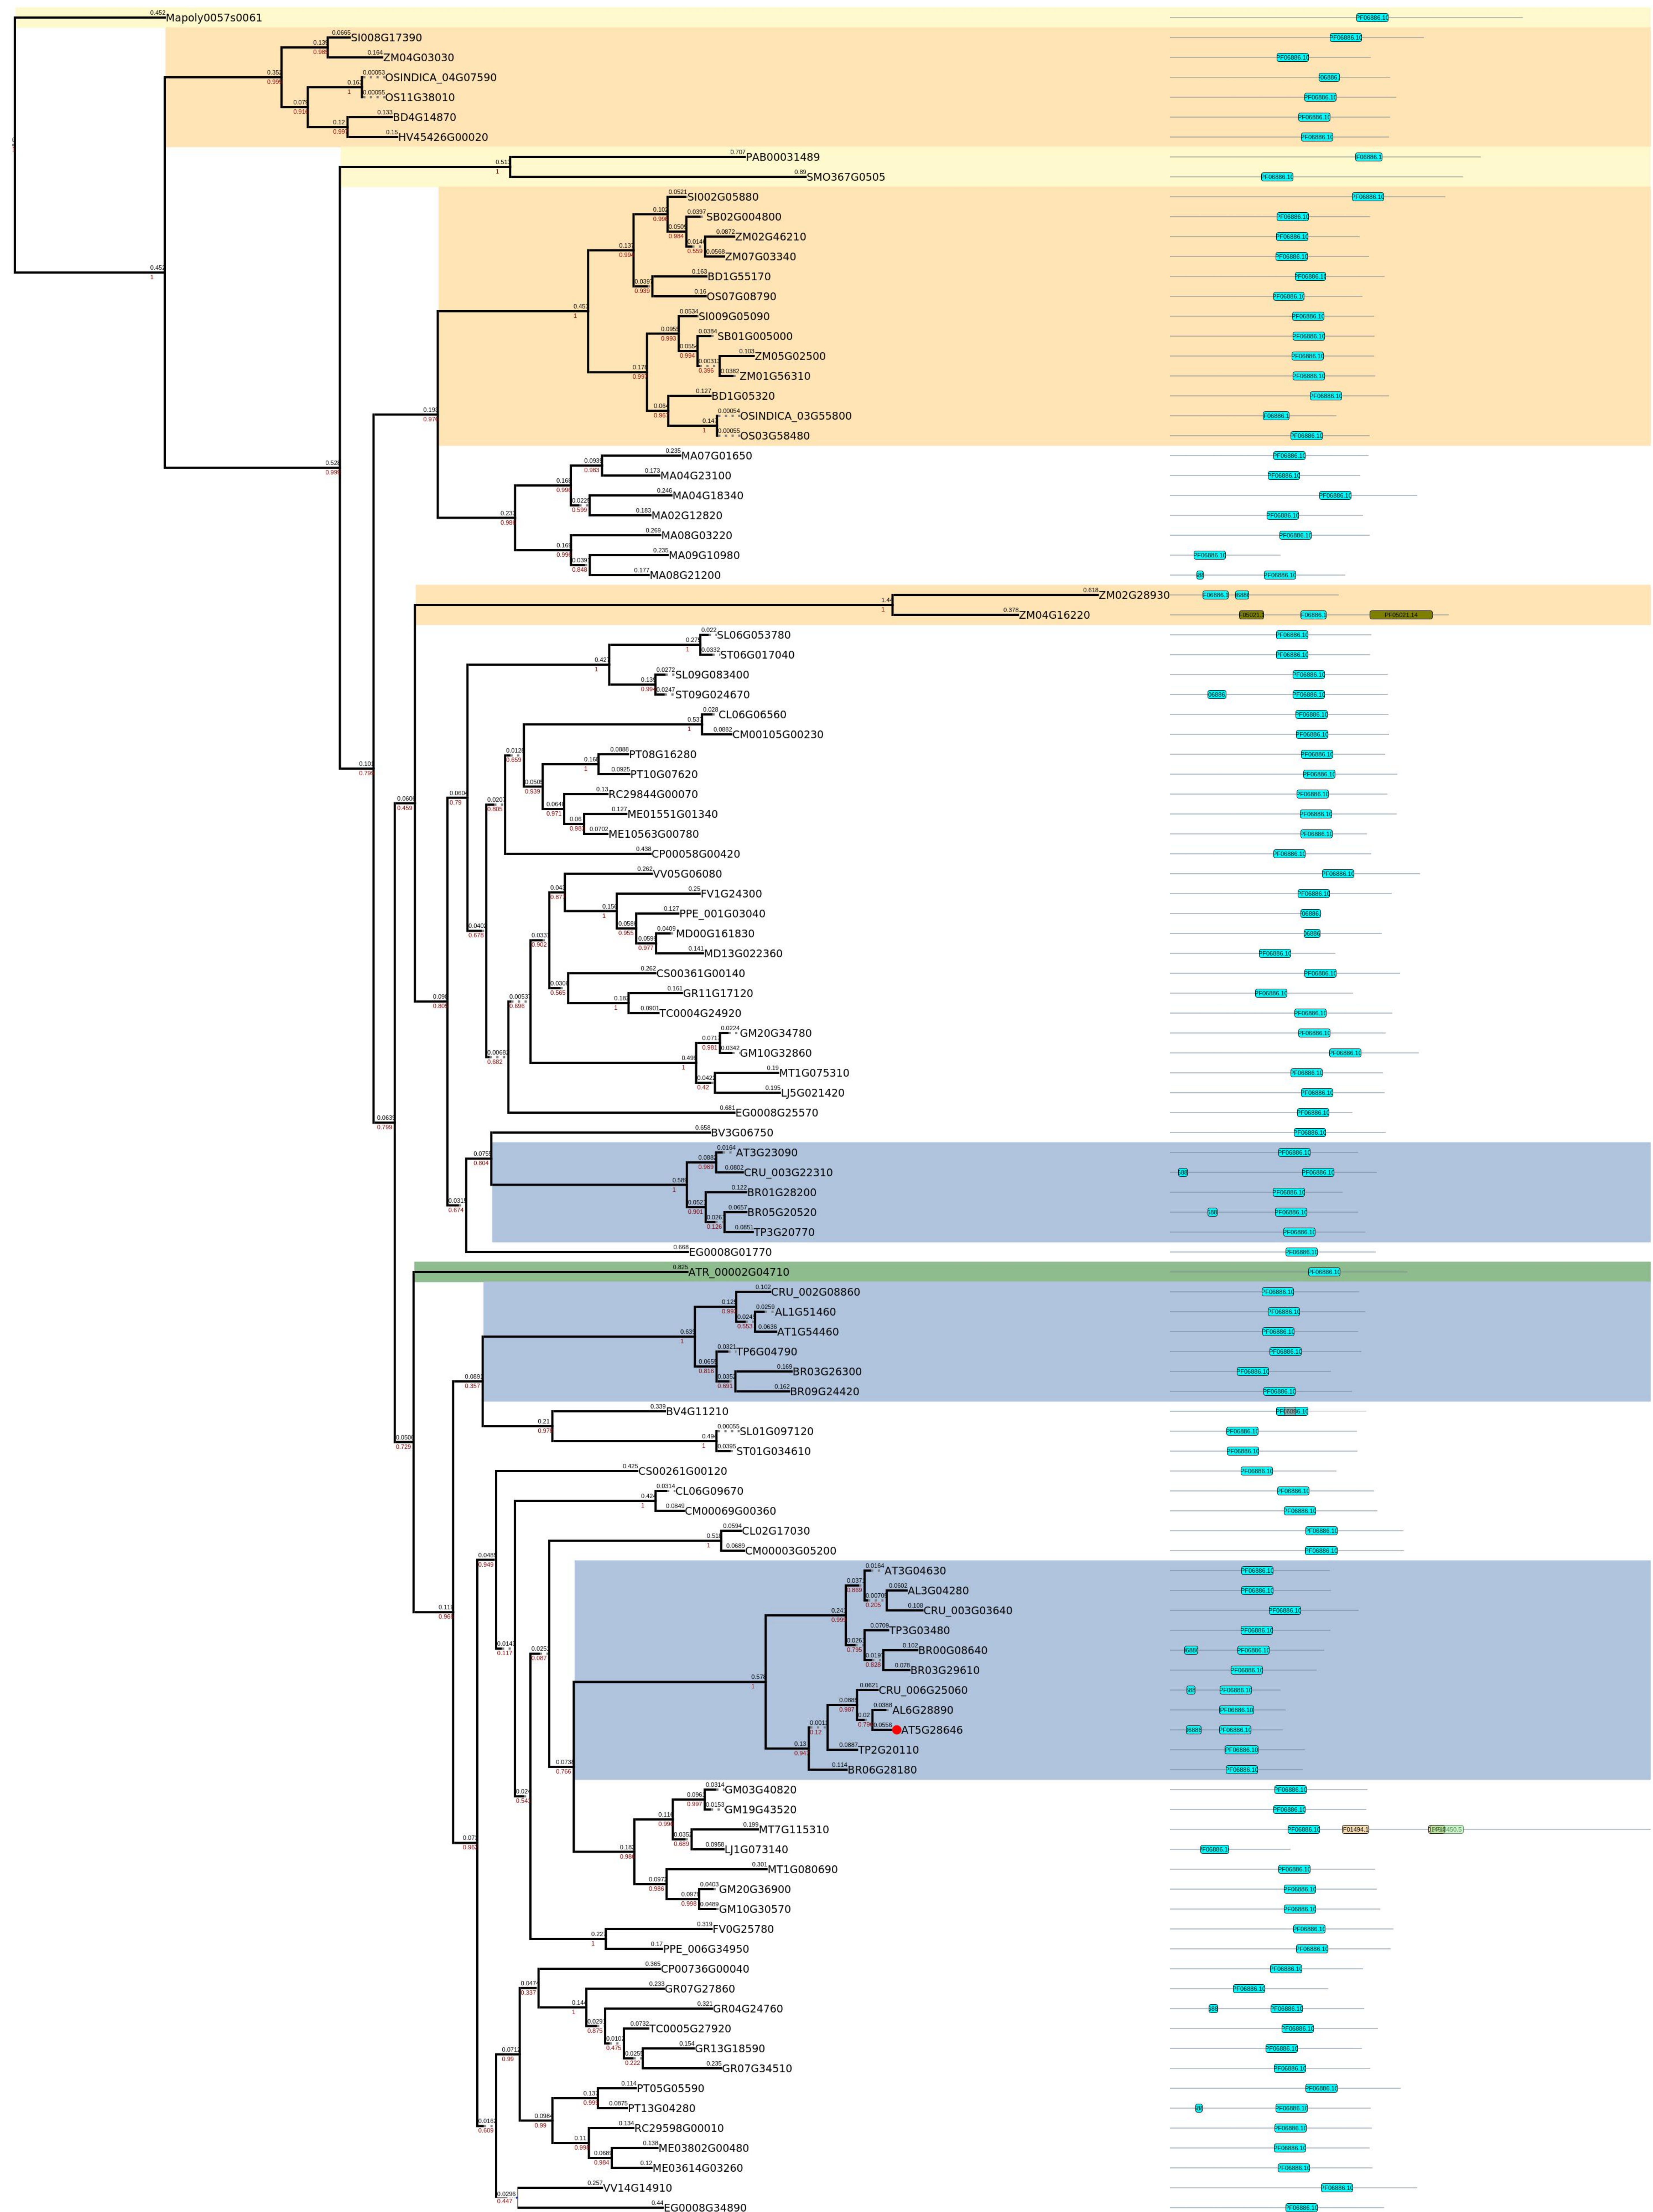

0.0833333

**taxonpmic identity of protein domain architecture**

|                             |                                                      |  |
|-----------------------------|------------------------------------------------------|--|
| <b>Poaceae</b>              | Targeting_protein_for_Xklp2_TPX2_PF06886_10          |  |
|                             | NPL4_family_PF05021_14                               |  |
| <b>Brassicales</b>          | Spectrin_binding_region_of_Ca2+_Calmodulin_PF17095_4 |  |
|                             | FAD_binding_domain_PF01494_18                        |  |
| <b>Out group</b>            | NAD_P_binding_Rossmann_like_domain_PF13450_5         |  |
| <b>Amborella trichopoda</b> |                                                      |  |



**Figure S59.** PhyML phylogenetic relations and composition of domains for AT5G42080 homologues of representative plant species. The color legends of species and domains is given below

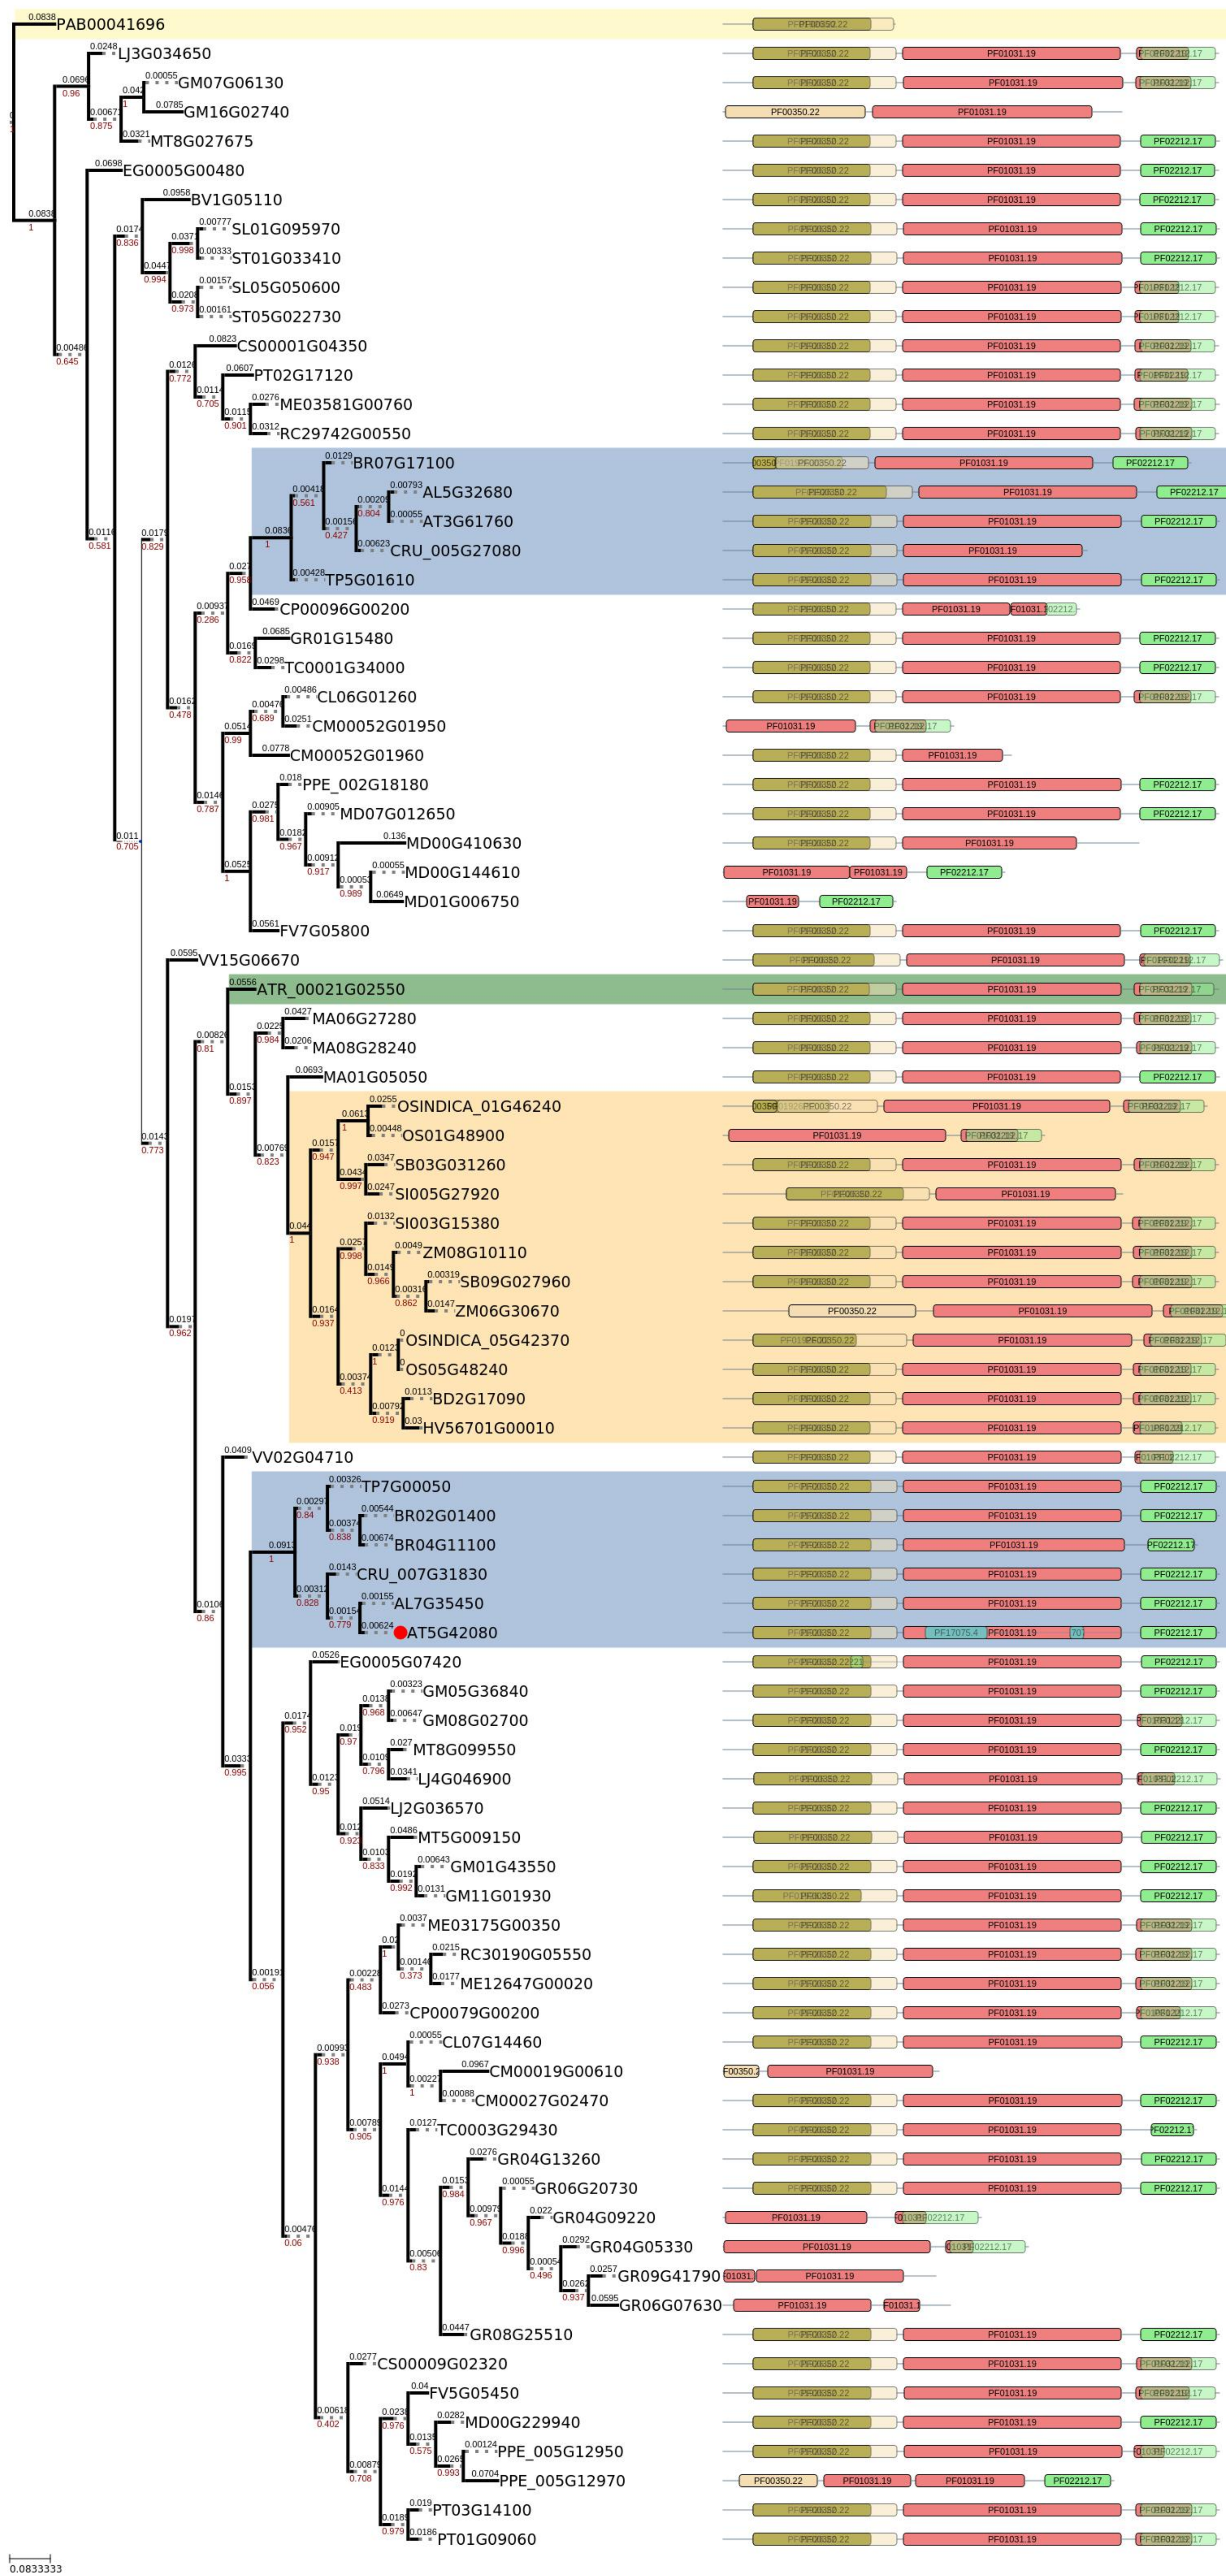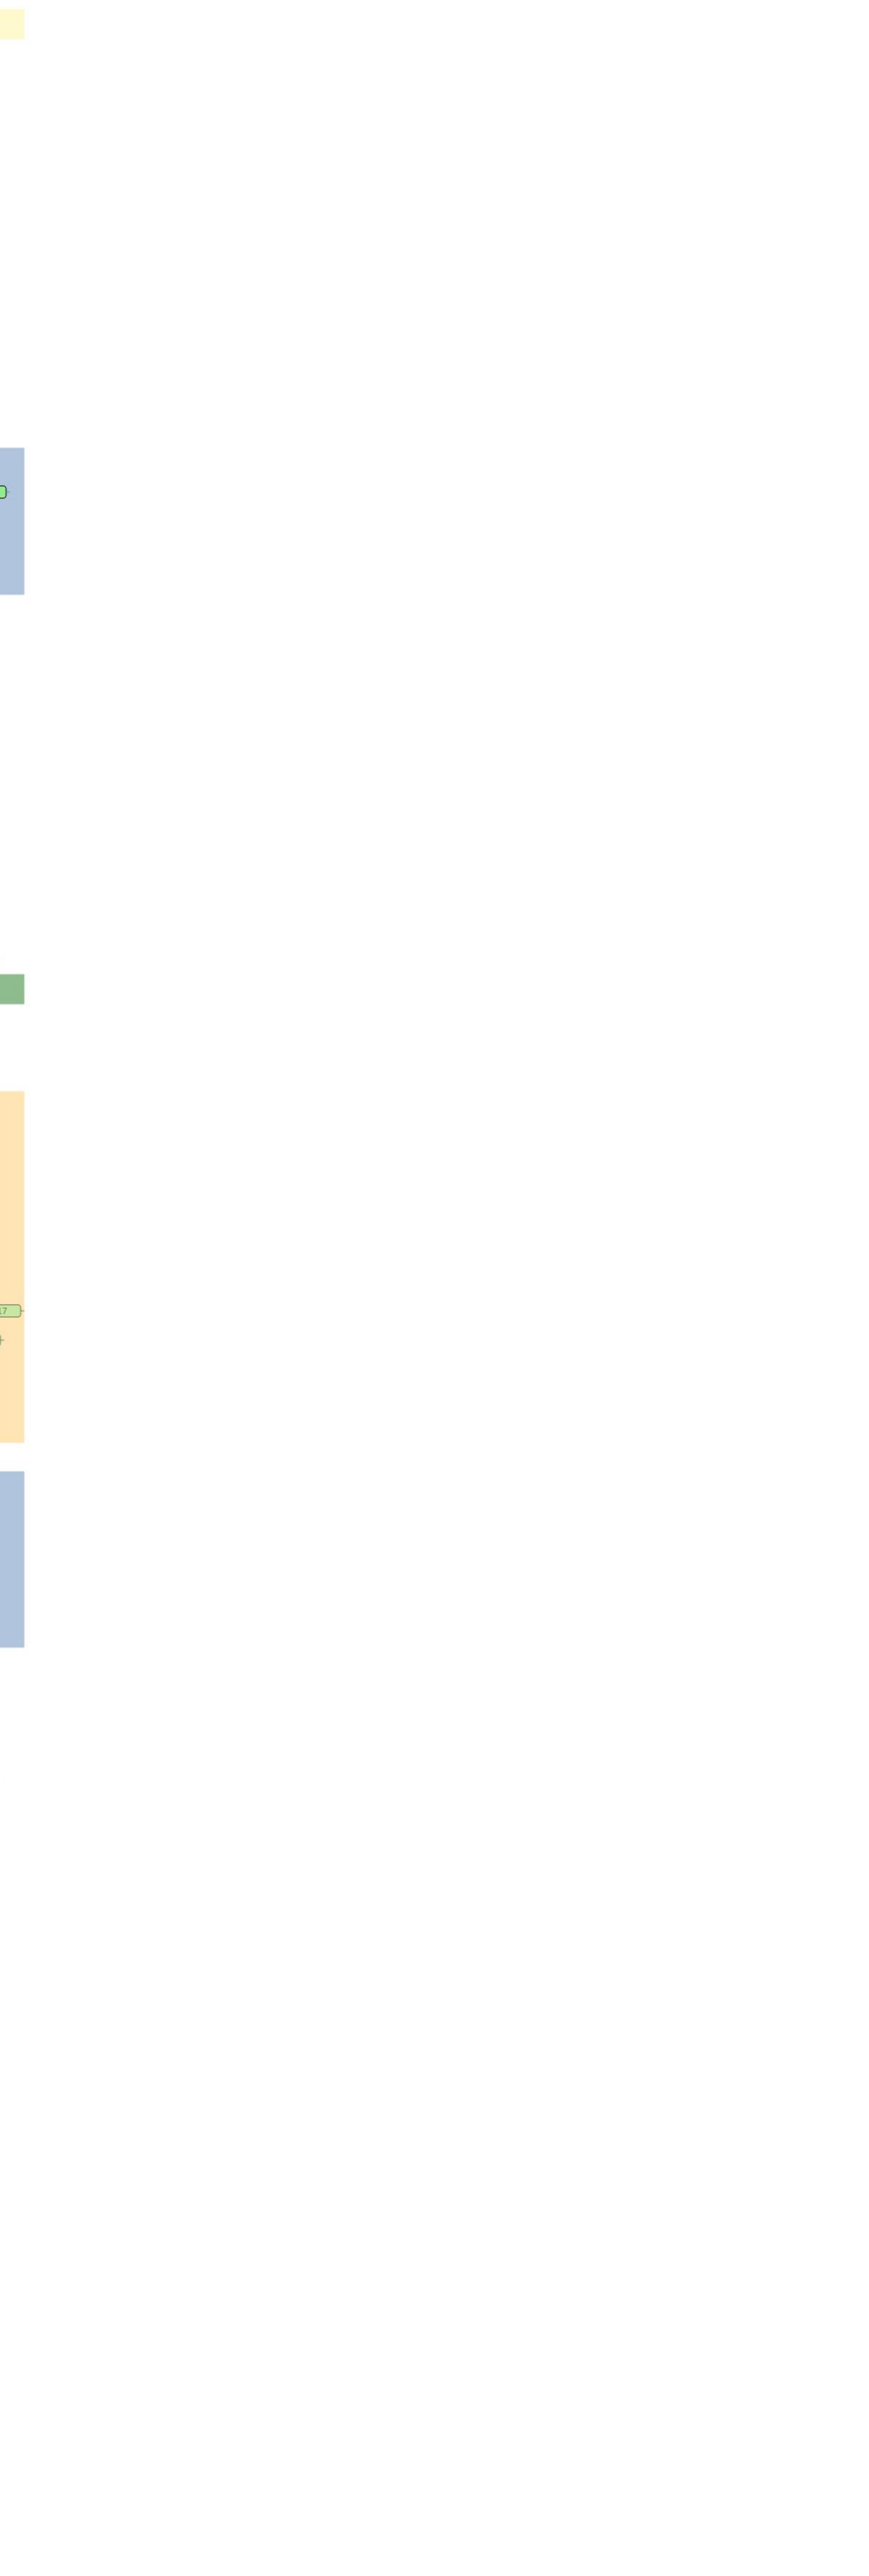

| taxon                | mic identity of protein                            | domain architecture |
|----------------------|----------------------------------------------------|---------------------|
| Poaceae              | Dynamin_family_PF00350_22                          | PF00350.22          |
| Poaceae              | 50S_ribosome_binding_GTPase_PF01926_22             | PF01926.22          |
| Brassicales          | Dynamin_central_region_PF01031_19                  | PF01031.19          |
| Out group            | Dynamin_GTPase_effector_domain_PF02212_17          | PF02212.17          |
| Amborella trichopoda | Regular_of_rDNA_transcription_protein_14_PF17075_4 | PF17075.4           |



**Figure S60.** PhyML phylogenetic relations and composition of domains for AT5G43900 homologues of representative plant species. The color legends of species and domains is given below

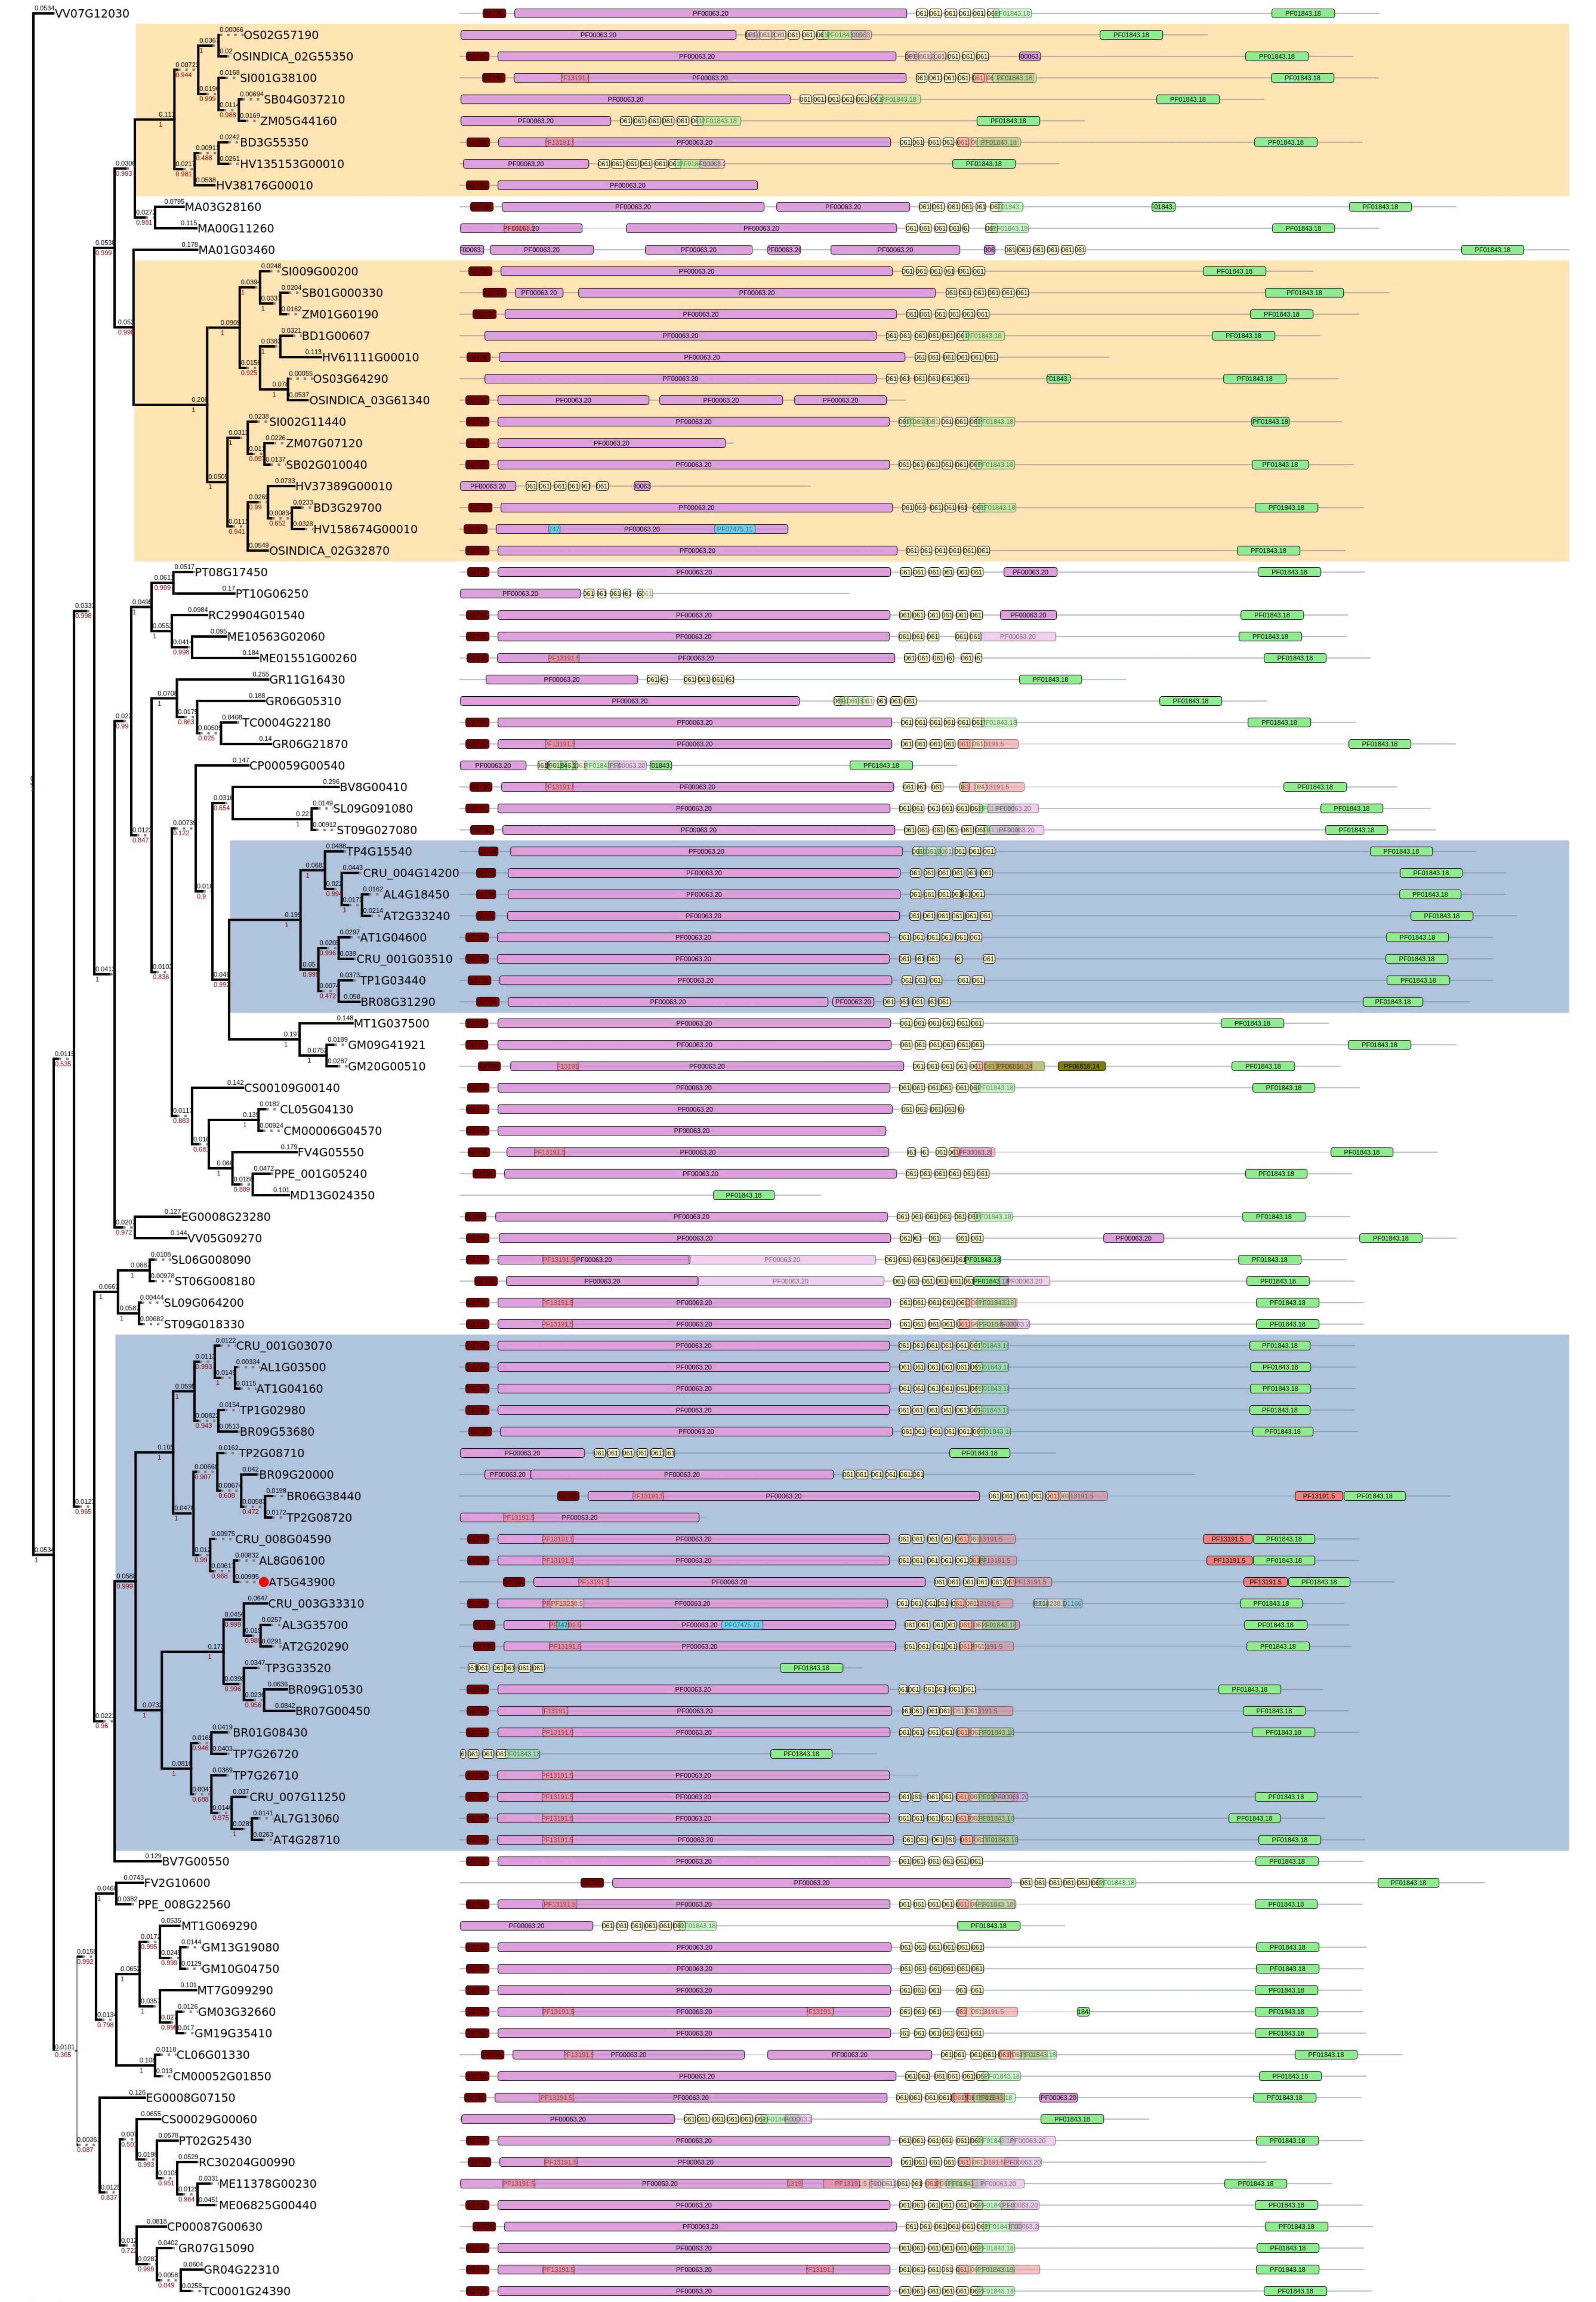

**taxonomic identity of protein**

**domain architecture**

- |                      |                                                |            |                                  |           |
|----------------------|------------------------------------------------|------------|----------------------------------|-----------|
| Poaceae              | DIL_domain_PF01843_18                          | PF01843.18 | TSC_22_dip_bun_family_PF01166_17 | PF0166.17 |
| Brassicales          | IQ_calmodulin_binding_motif_PF00612_26         | PF00612.26 |                                  |           |
| Out group            | Myosin_head_motor_domain_PF00063_20            | PF00063.20 |                                  |           |
|                      | Myosin_N_terminal_SH3_like_domain_PF02736_18   | PF02736.18 |                                  |           |
|                      | AAA_ATPase_domain_PF13191_5                    | PF13191.5  |                                  |           |
| Amborella trichopoda | HPr_Serine_kinase_C_terminal_domain_PF07475_11 | PF07475.11 |                                  |           |
|                      | Fez1_PF06818_14                                | PF06818.14 |                                  |           |
|                      | AAA_domain_PF13238_5                           | PF13238.5  |                                  |           |



**Figure S61.** PhyML phylogenetic relations and composition of domains for AT5G45190, AT4G19600 homologues of representative plant species. The color legends of species and domains is given below

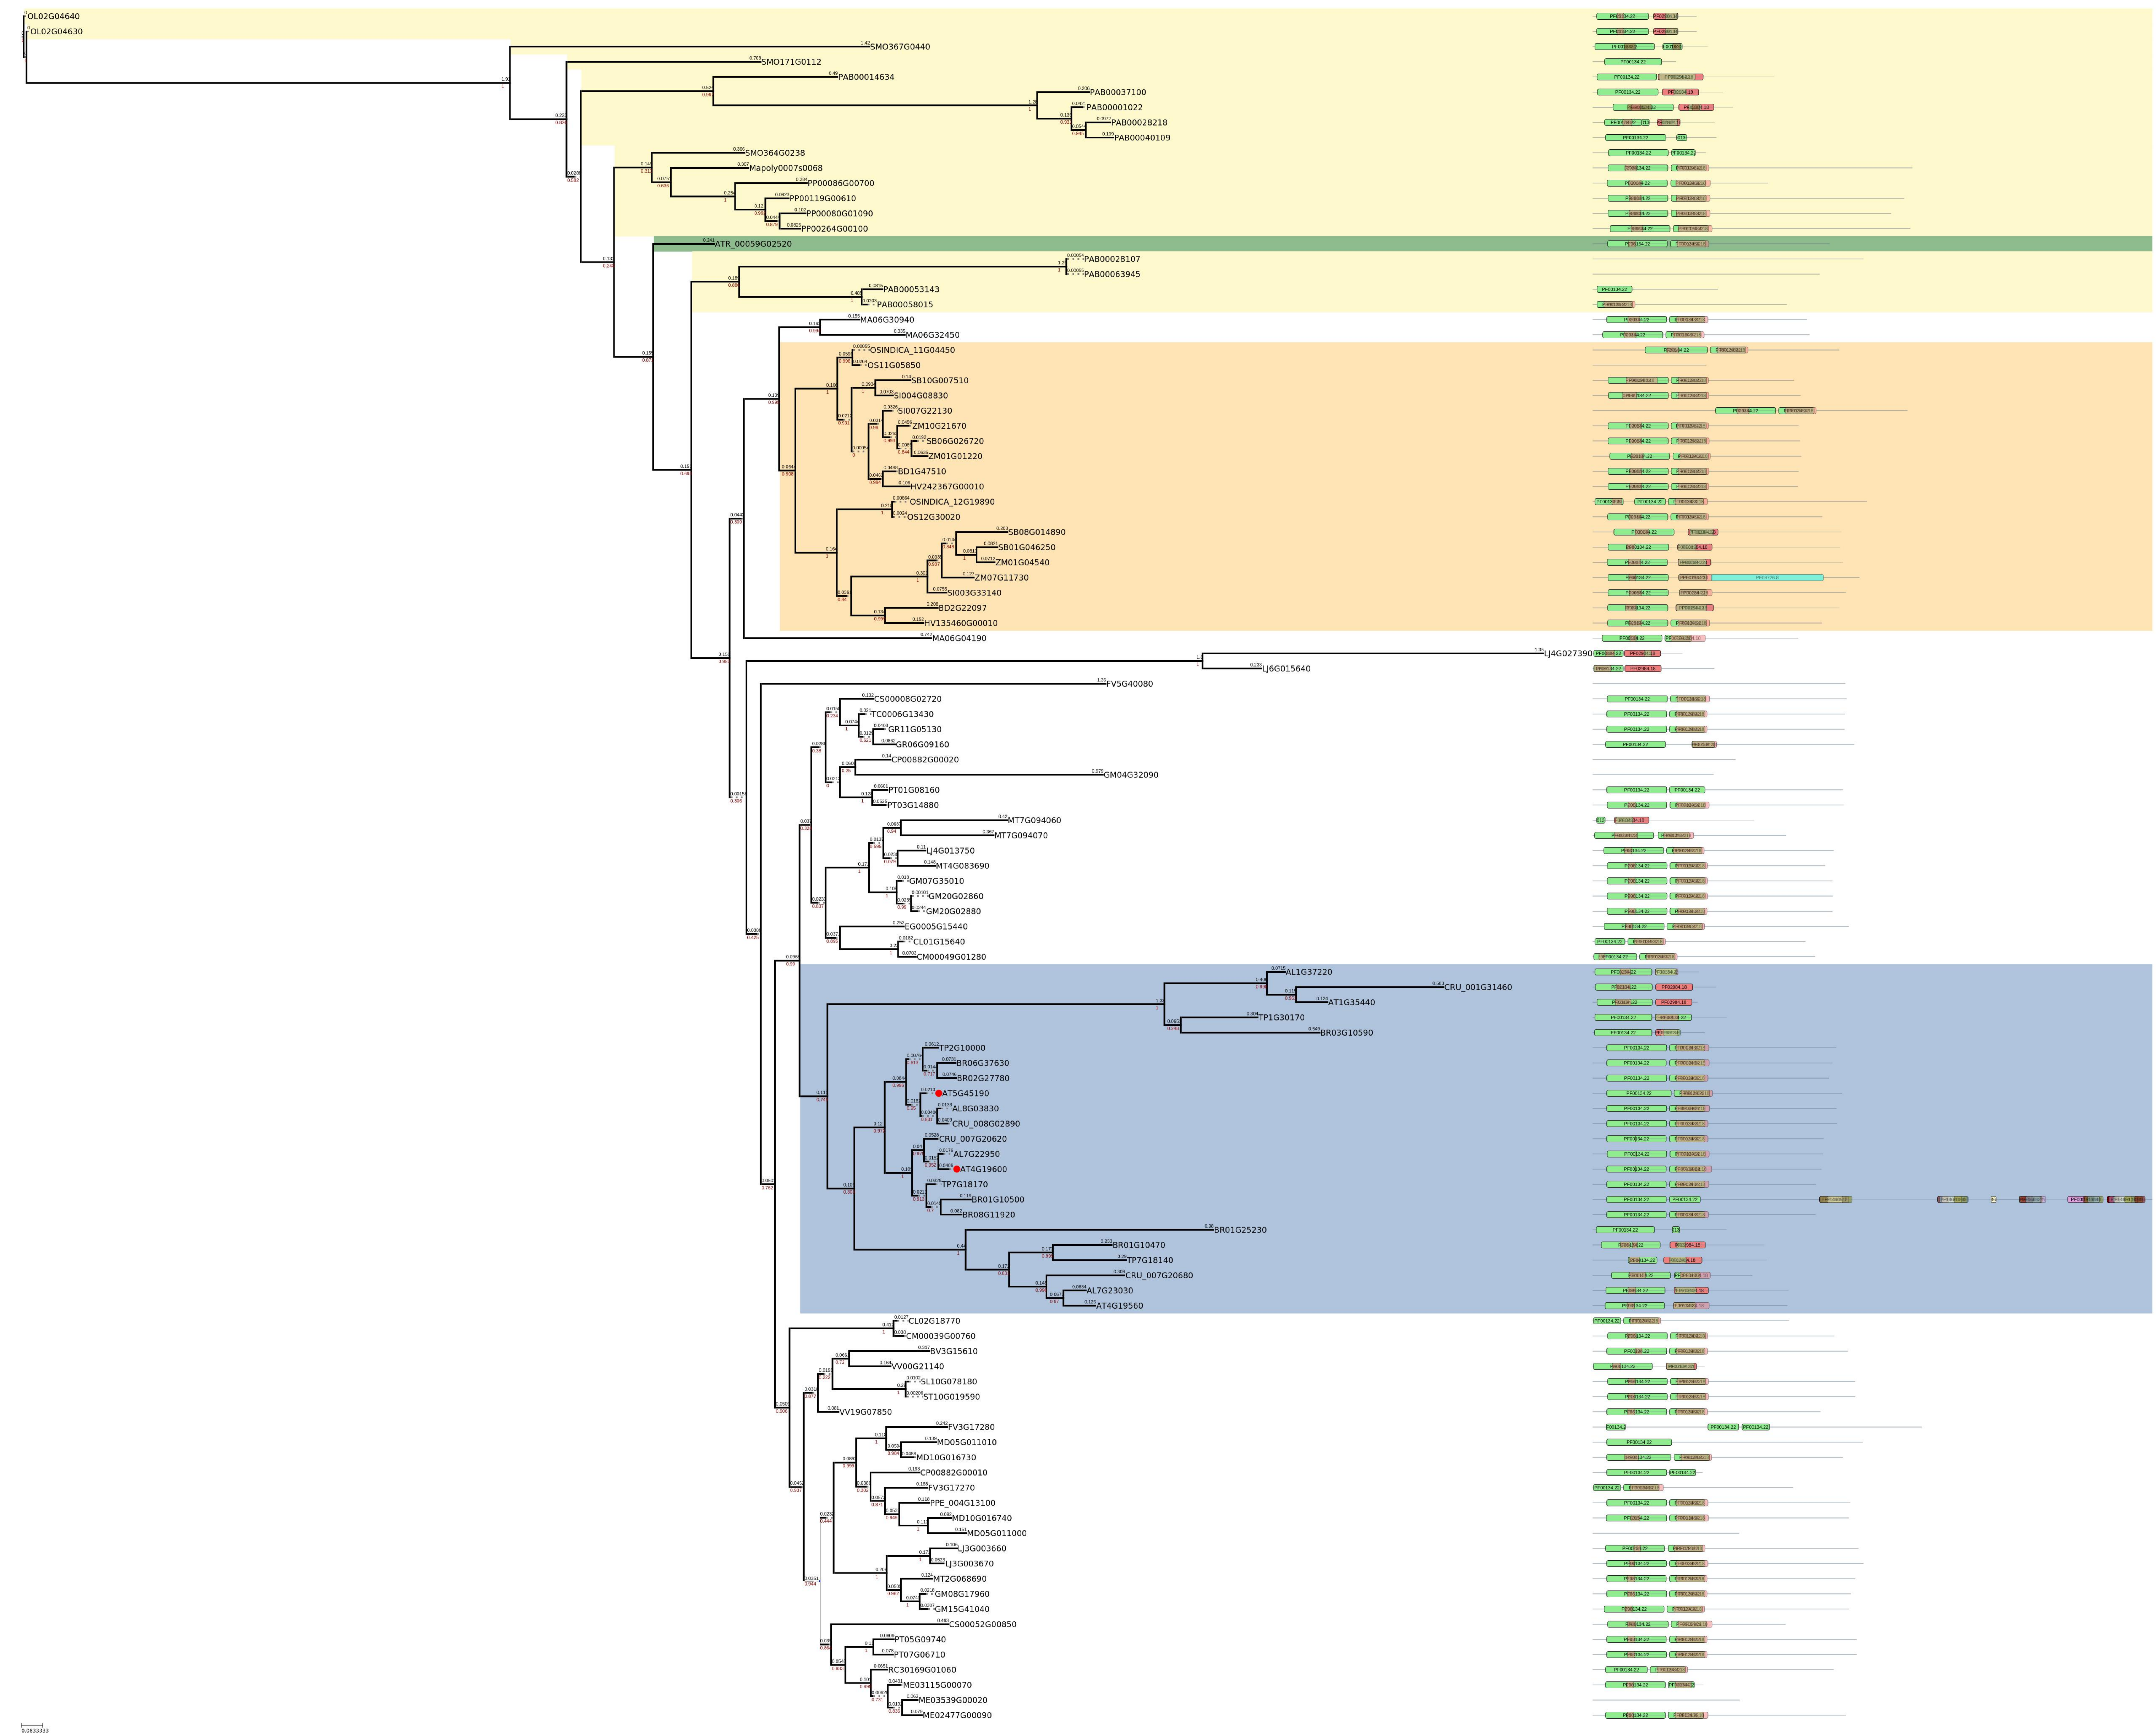

0.0003333

**taxonomic identity of protein**

- Poaceae
- Brassicales
- Out group
- Amborella trichopoda

**domain architecture**

- Cyclin\_C\_terminal\_domain\_PF02984\_18
- Cyclin\_N\_terminal\_domain\_PF00134\_22
- Transcription\_factor\_TFIIIB\_repeat\_PF00382\_18
- Maccollin\_family\_PF09726\_8
- Cyclin\_C\_terminal\_domain\_PF16899\_4
- Limkain\_b1\_PF11608\_7
- Nup53\_35\_40\_type\_RNA\_recognition\_motif\_PF14605\_5
- RNA\_recognition\_motif\_a\_k\_a\_RRM\_RBD\_or\_RNP\_domain\_PF00076\_21
- RNA\_recognition\_motif\_PF16367\_4
- Occluded\_RNA\_recognition\_motif\_PF16842\_4



**Figure S62.** Phylogenetic relations and composition of domains for AT2G33540 homologues of representative plant species.  
The color legends of species and domains is given below

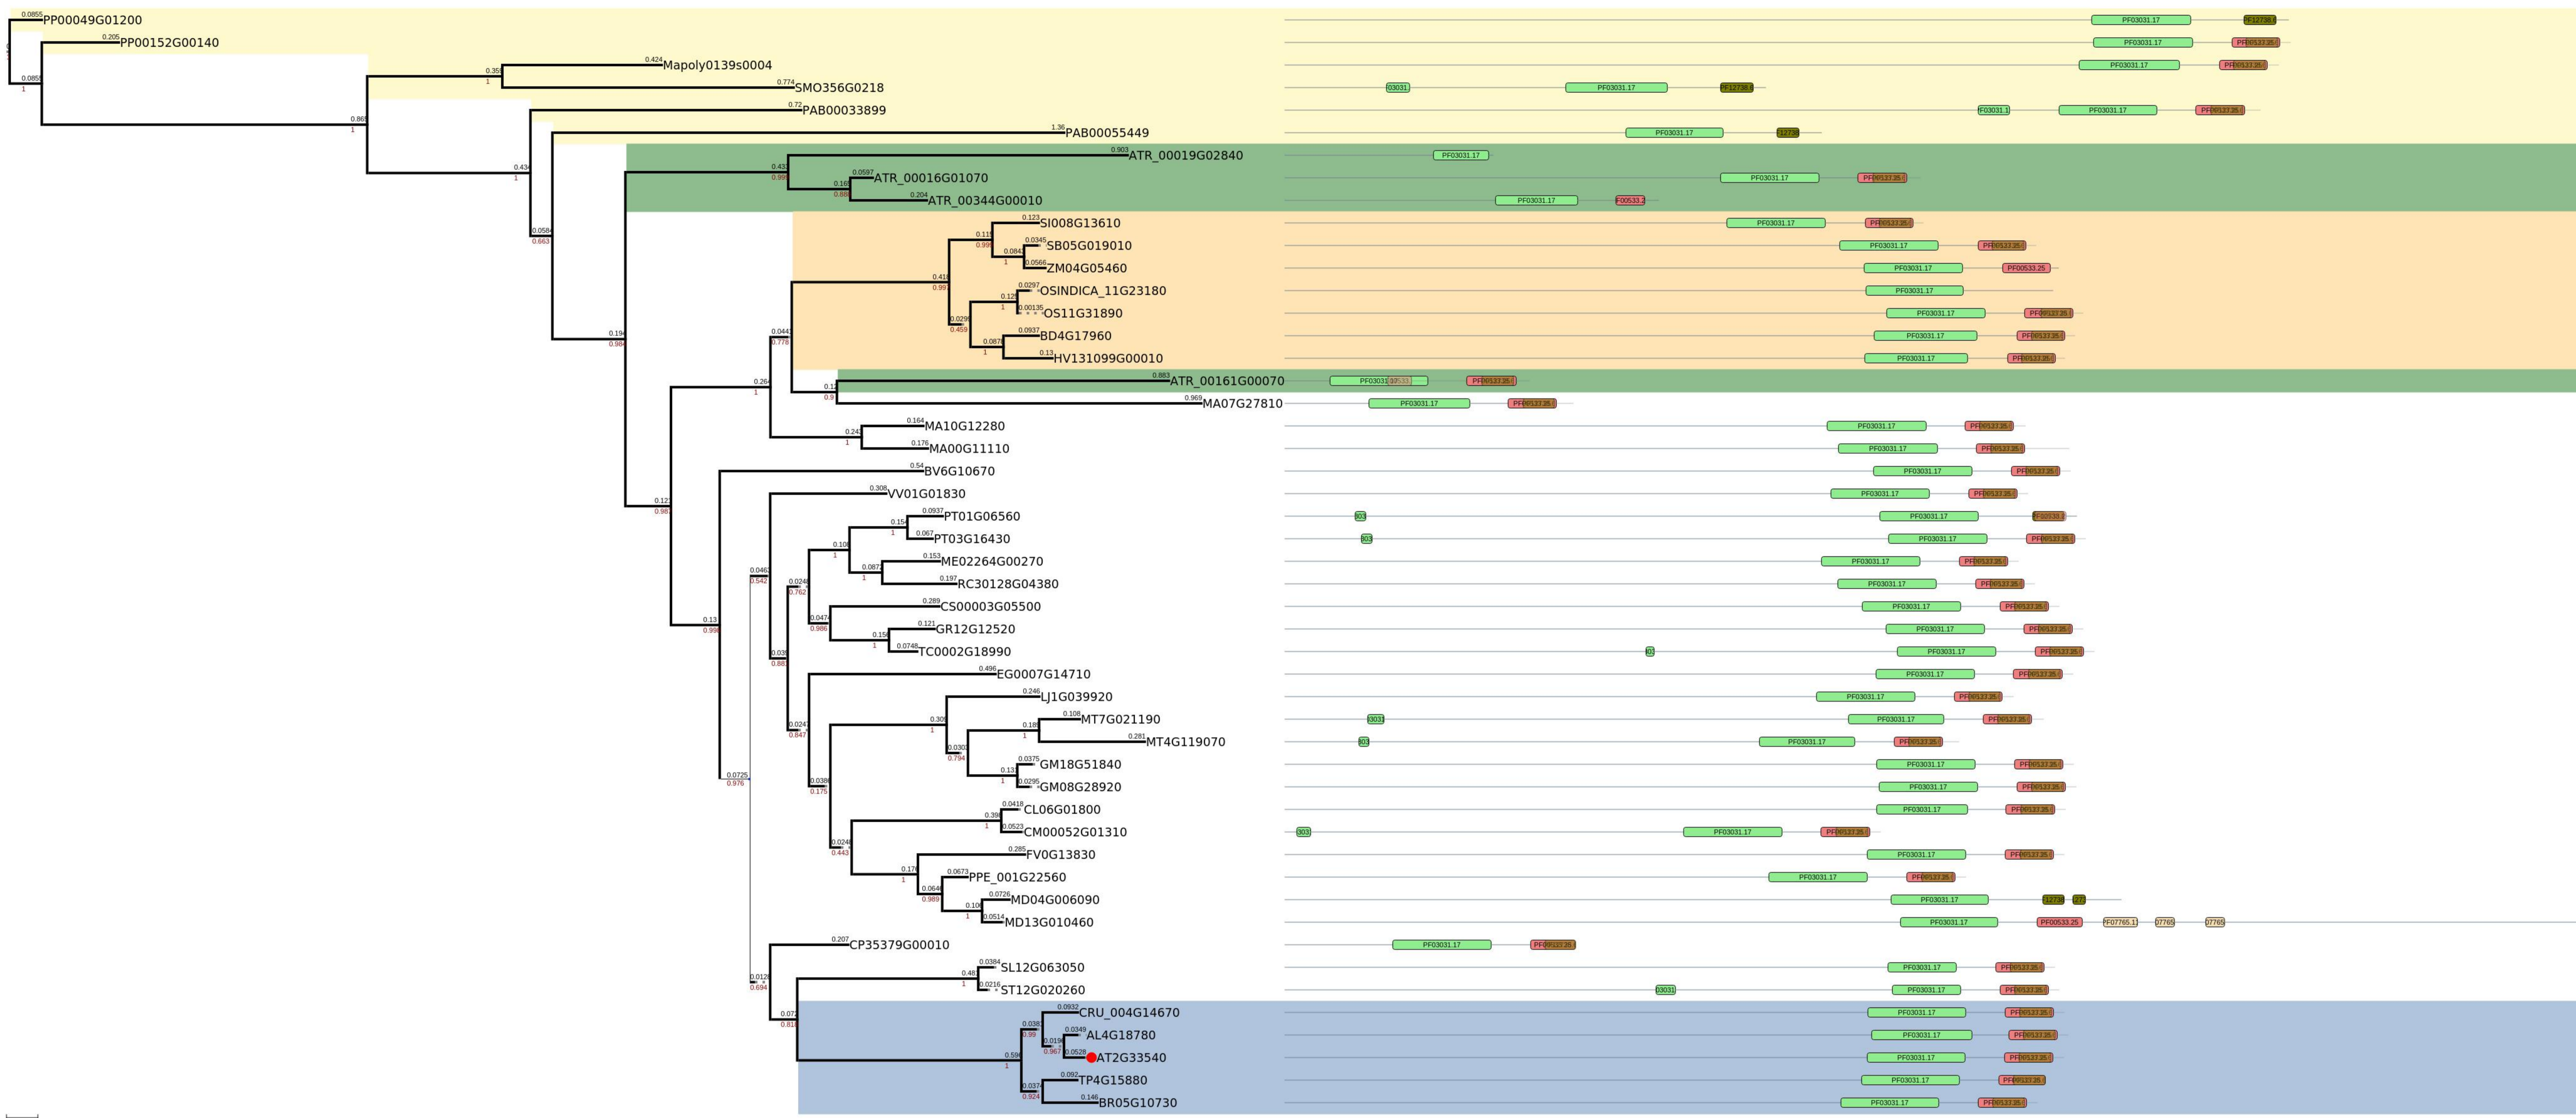

0.0833333

**taxonpmic identity of protein domain architecture**

|                             |                                                    |  |
|-----------------------------|----------------------------------------------------|--|
| <b>Poaceae</b>              | NLI_interacting_factor_like_phosphatase_PF03031_17 |  |
|                             | twin_BRCT_domain_PF12738_6                         |  |
| <b>Brassicales</b>          | BRCA1_C_Terminus_BRCT_domain_PF00533_25            |  |
| <b>Out group</b>            | KIP1_like_protein_PF07765_11                       |  |
| <b>Amborella trichopoda</b> |                                                    |  |



**Figure S63.** PhyML phylogenetic relations and composition of domains for AT5G58230 homologues of representative plant species. The color legends of species and domains is given below

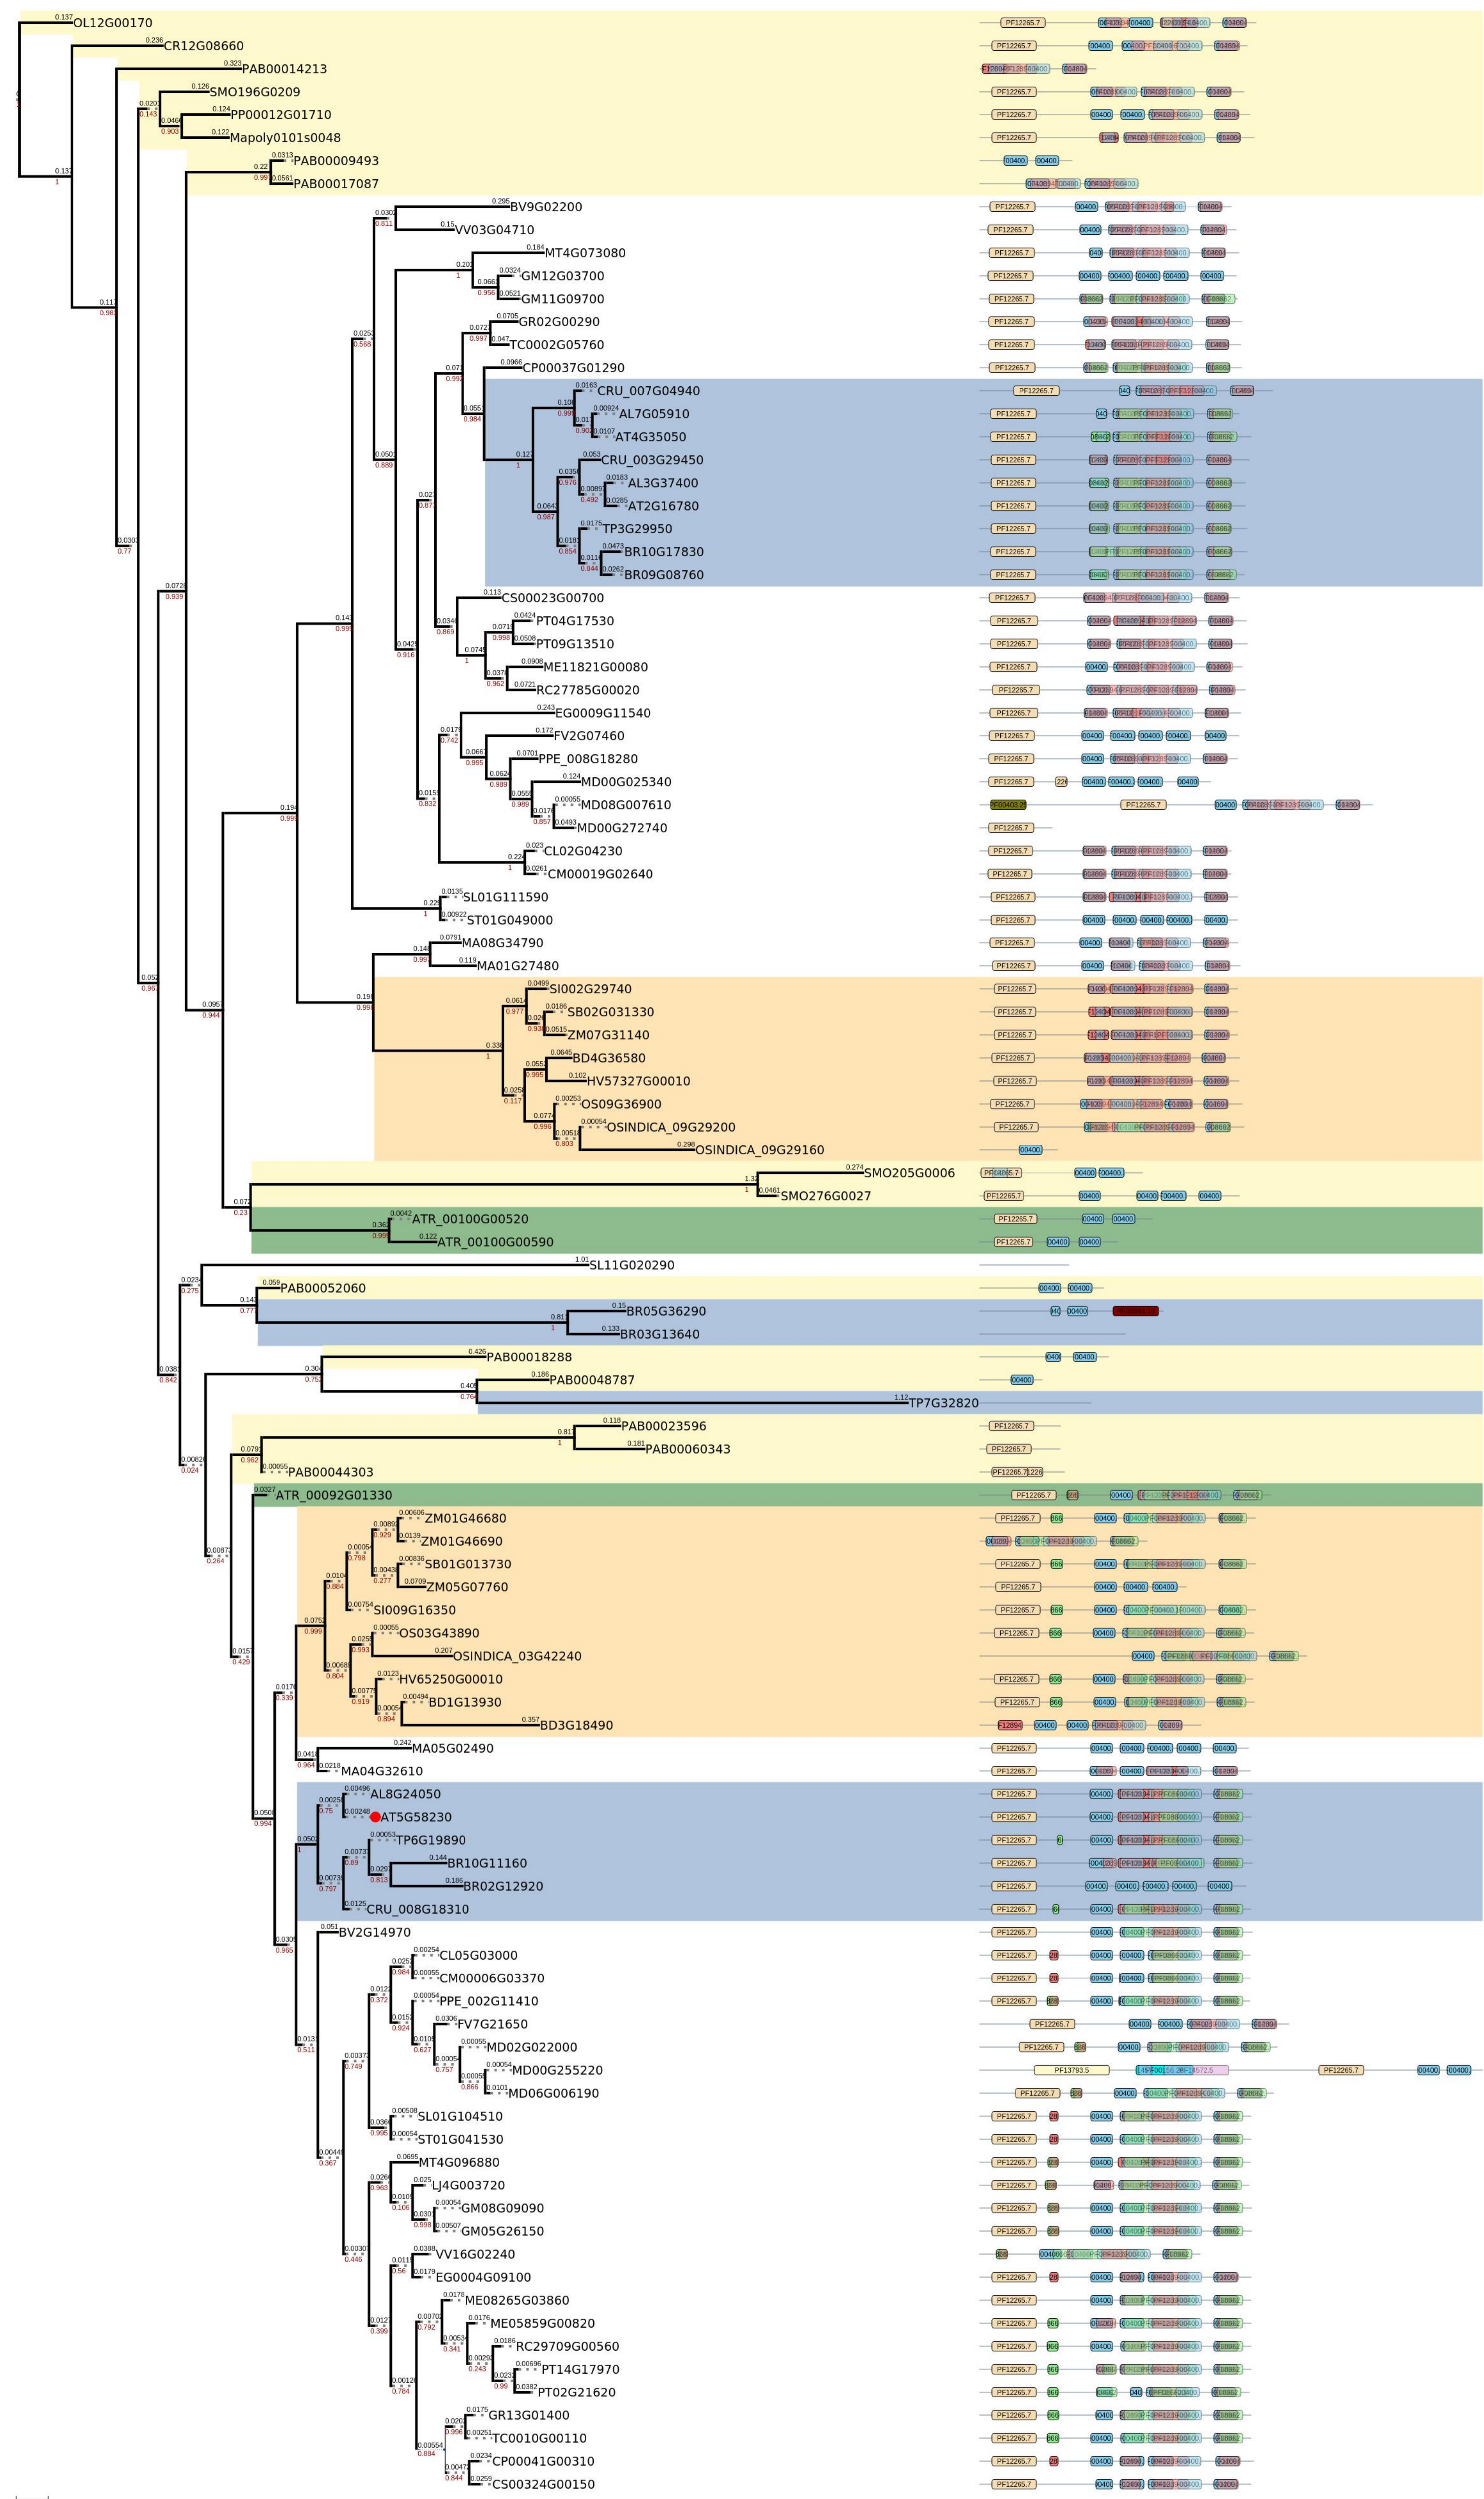

**taxonomic identity of protein**

| Taxonomic Group      | Protein                                                              |
|----------------------|----------------------------------------------------------------------|
| Poaceae              | Anaphase_promoting_complex_subunit_4_WD40_domain_PFI2894_6           |
| Brassicales          | Histone_binding_protein_RBBP4_or_subunit_C_of_CAF1_complex_PFI2265_7 |
| Out group            | WD_domain_G_beta_repeat_PF00400_31                                   |
| Amborella trichopoda | Eukaryotic_translation_initiation_factor_eIF2A_PF08662_10            |
|                      | Heavy_metal_associated_domain_PF00403_25                             |
|                      | SecY_translocase_PF00344_19                                          |
|                      | Phosphoribosyl_transferase_domain_PF00156_26                         |
|                      | N_terminal_domain_of_ribose_phosphate_pyrophosphokinase_PFI3793_5    |

**domain architecture**

| Domain ID  | Domain Name                                           |
|------------|-------------------------------------------------------|
| PF12894_6  | Phosphoribosyl_synthetase_associated_domain_PFI4572_5 |
| PF12265_7  |                                                       |
| PF00400_31 |                                                       |
| PF08662_10 |                                                       |
| PF00007_20 |                                                       |
| PF00156_26 |                                                       |
| PF13793_5  |                                                       |



**Figure S64.** PhyML phylogenetic relations and composition of domains for AT5G64630 homologues of representative plant species. The color legends of species and domains is given below

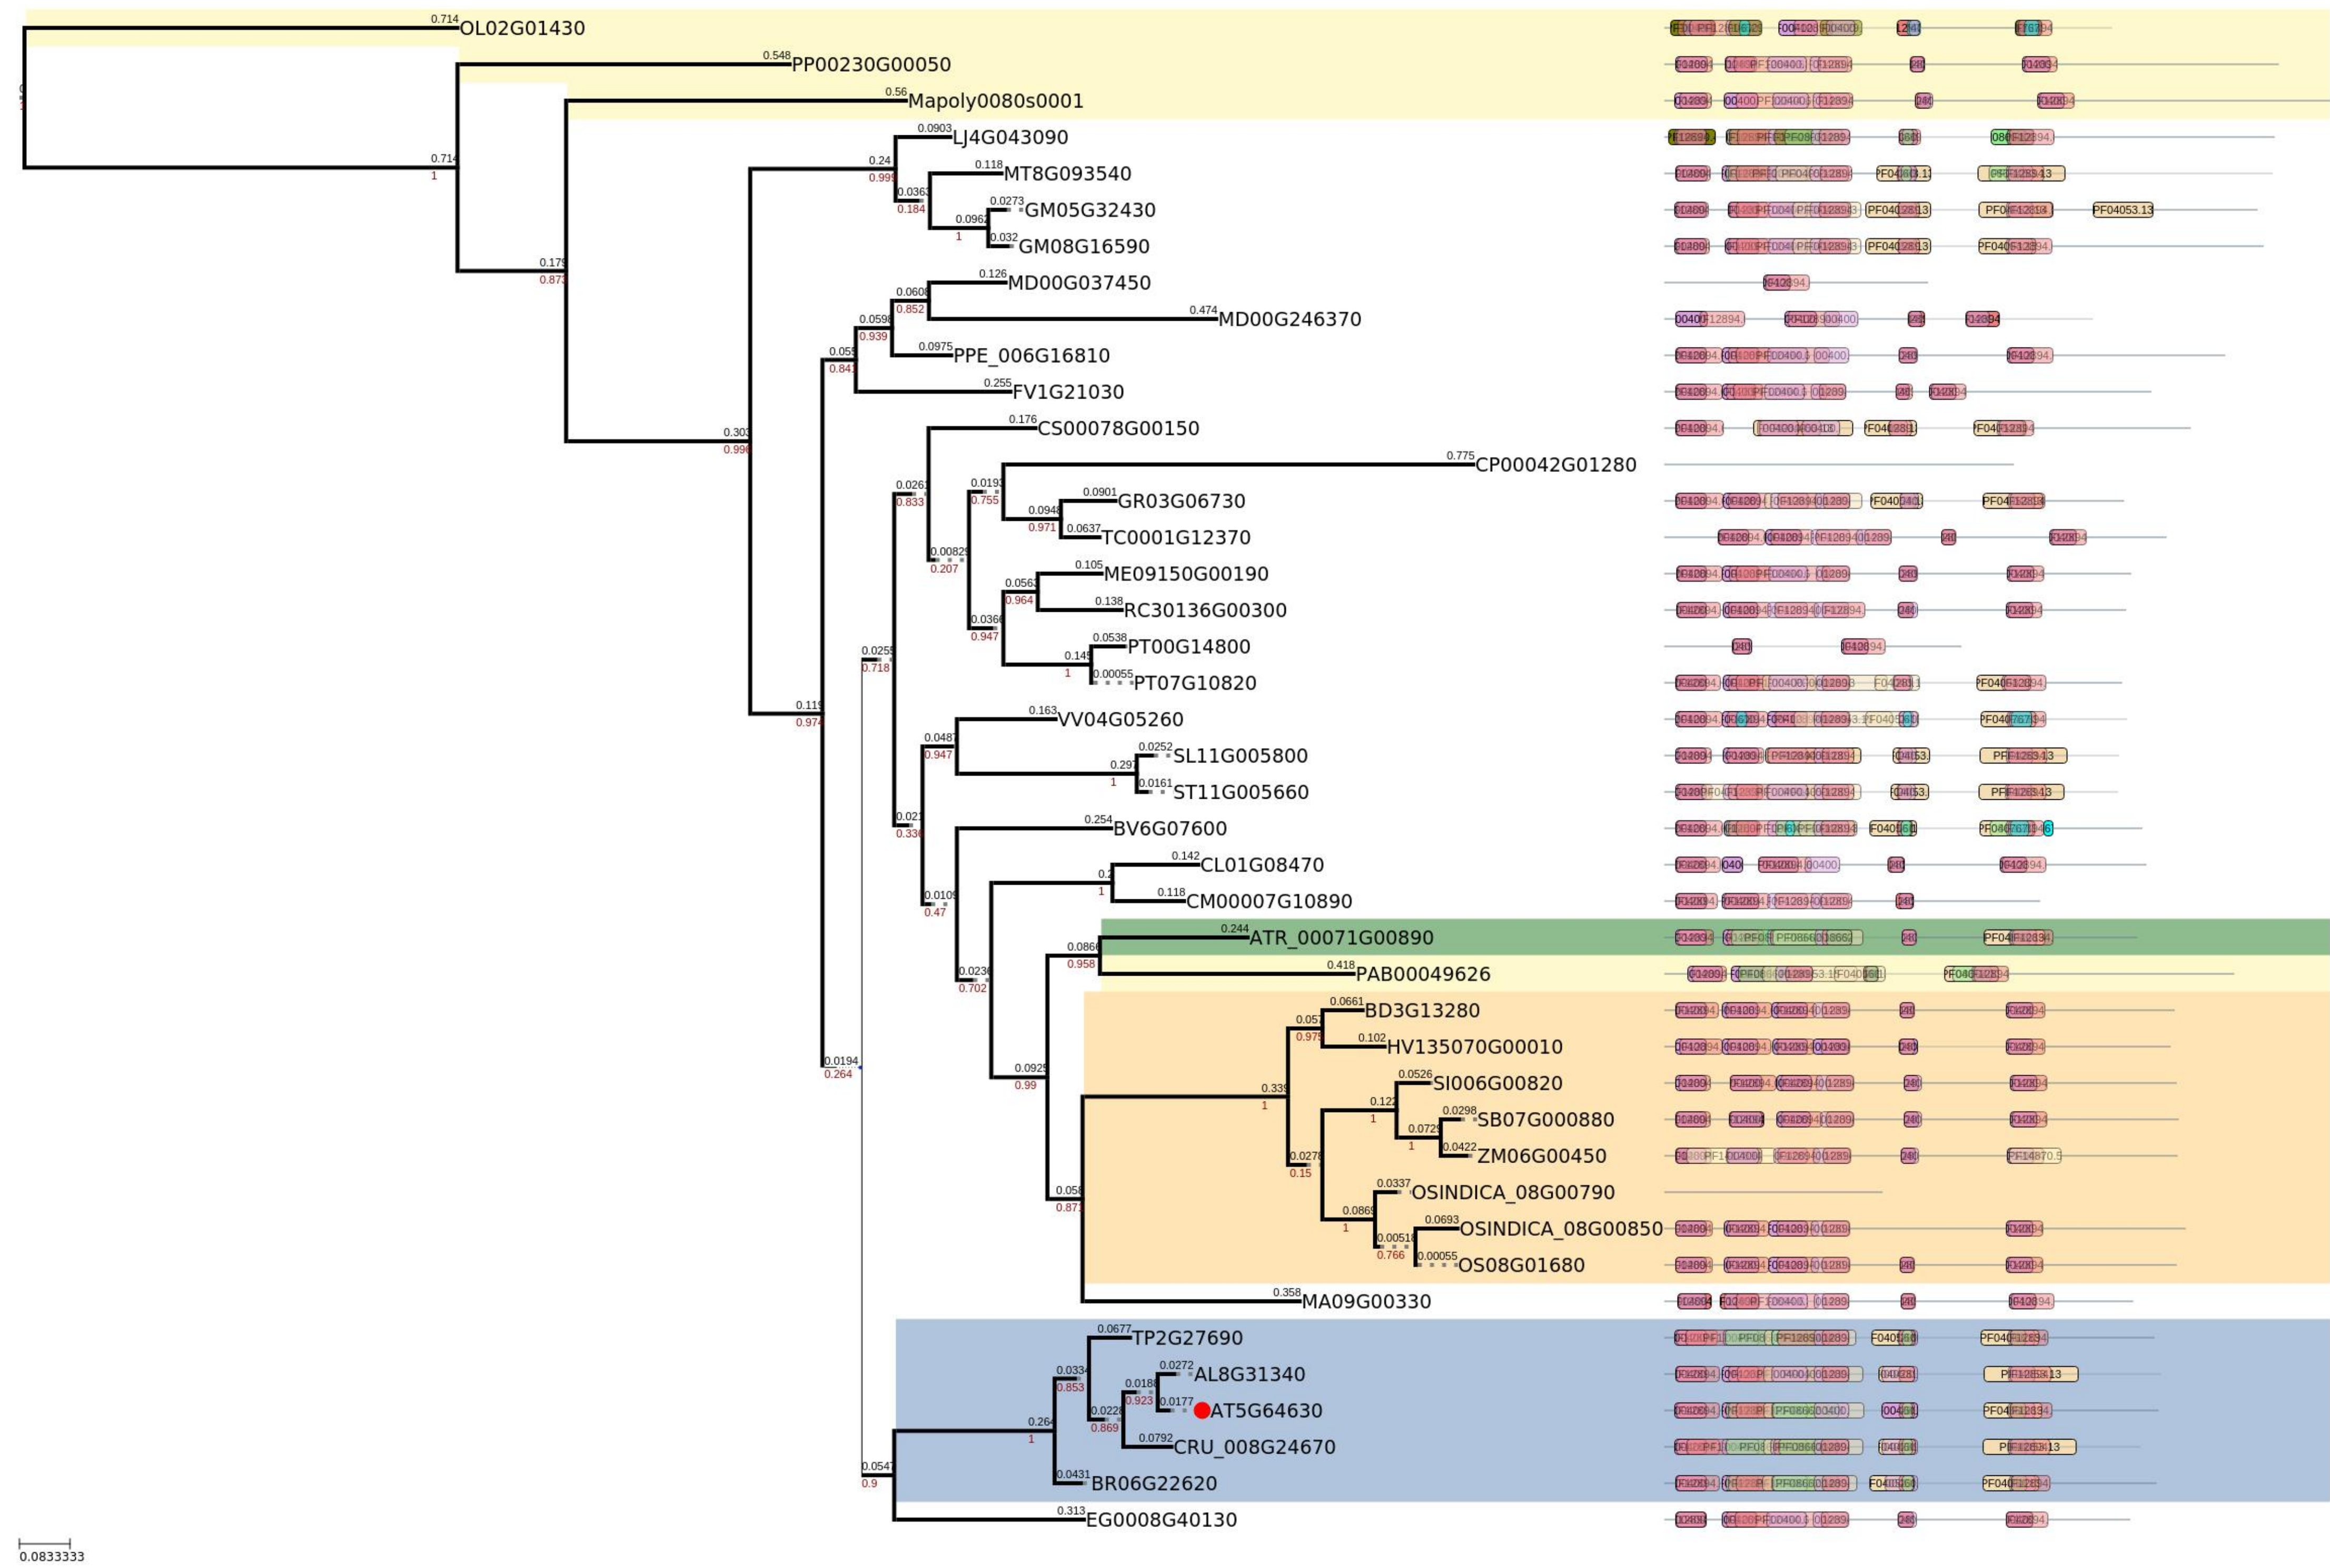

**taxonomic identity of protein**

**domain architecture**

- Poaceae**
- Brassicales**
- Out group**
- Amborella trichopoda**

- Anaphase\_promoting\_complex\_subunit\_4\_WD40\_domain\_PF12894\_6
- WD40\_region\_of\_Ge1\_enhancer\_of\_mRNA\_decapping\_protein\_PF16529\_4
- WD40\_like\_Beta\_Propeller\_Repeat\_PF07676\_11
- WD\_domain\_G\_beta\_repeat\_PF00400\_31
- Eukaryotic\_translation\_initiation\_factor\_eIF2A\_PF08662\_10
- Coatomer\_WD\_associated\_region\_PF04053\_13
- Photosynthesis\_system\_II\_assembly\_factor\_YCF48\_PF14870\_5

- PF12894.6
- PF16529.4
- PF07676.11
- PF00400.31
- PF08662.10
- PF04053.13
- PF14870.5



**Figure S65.** PhyML phylogenetic relations and composition of domains for AT5G65930 homologues of representative plant species. The color legends of species and domains is given below

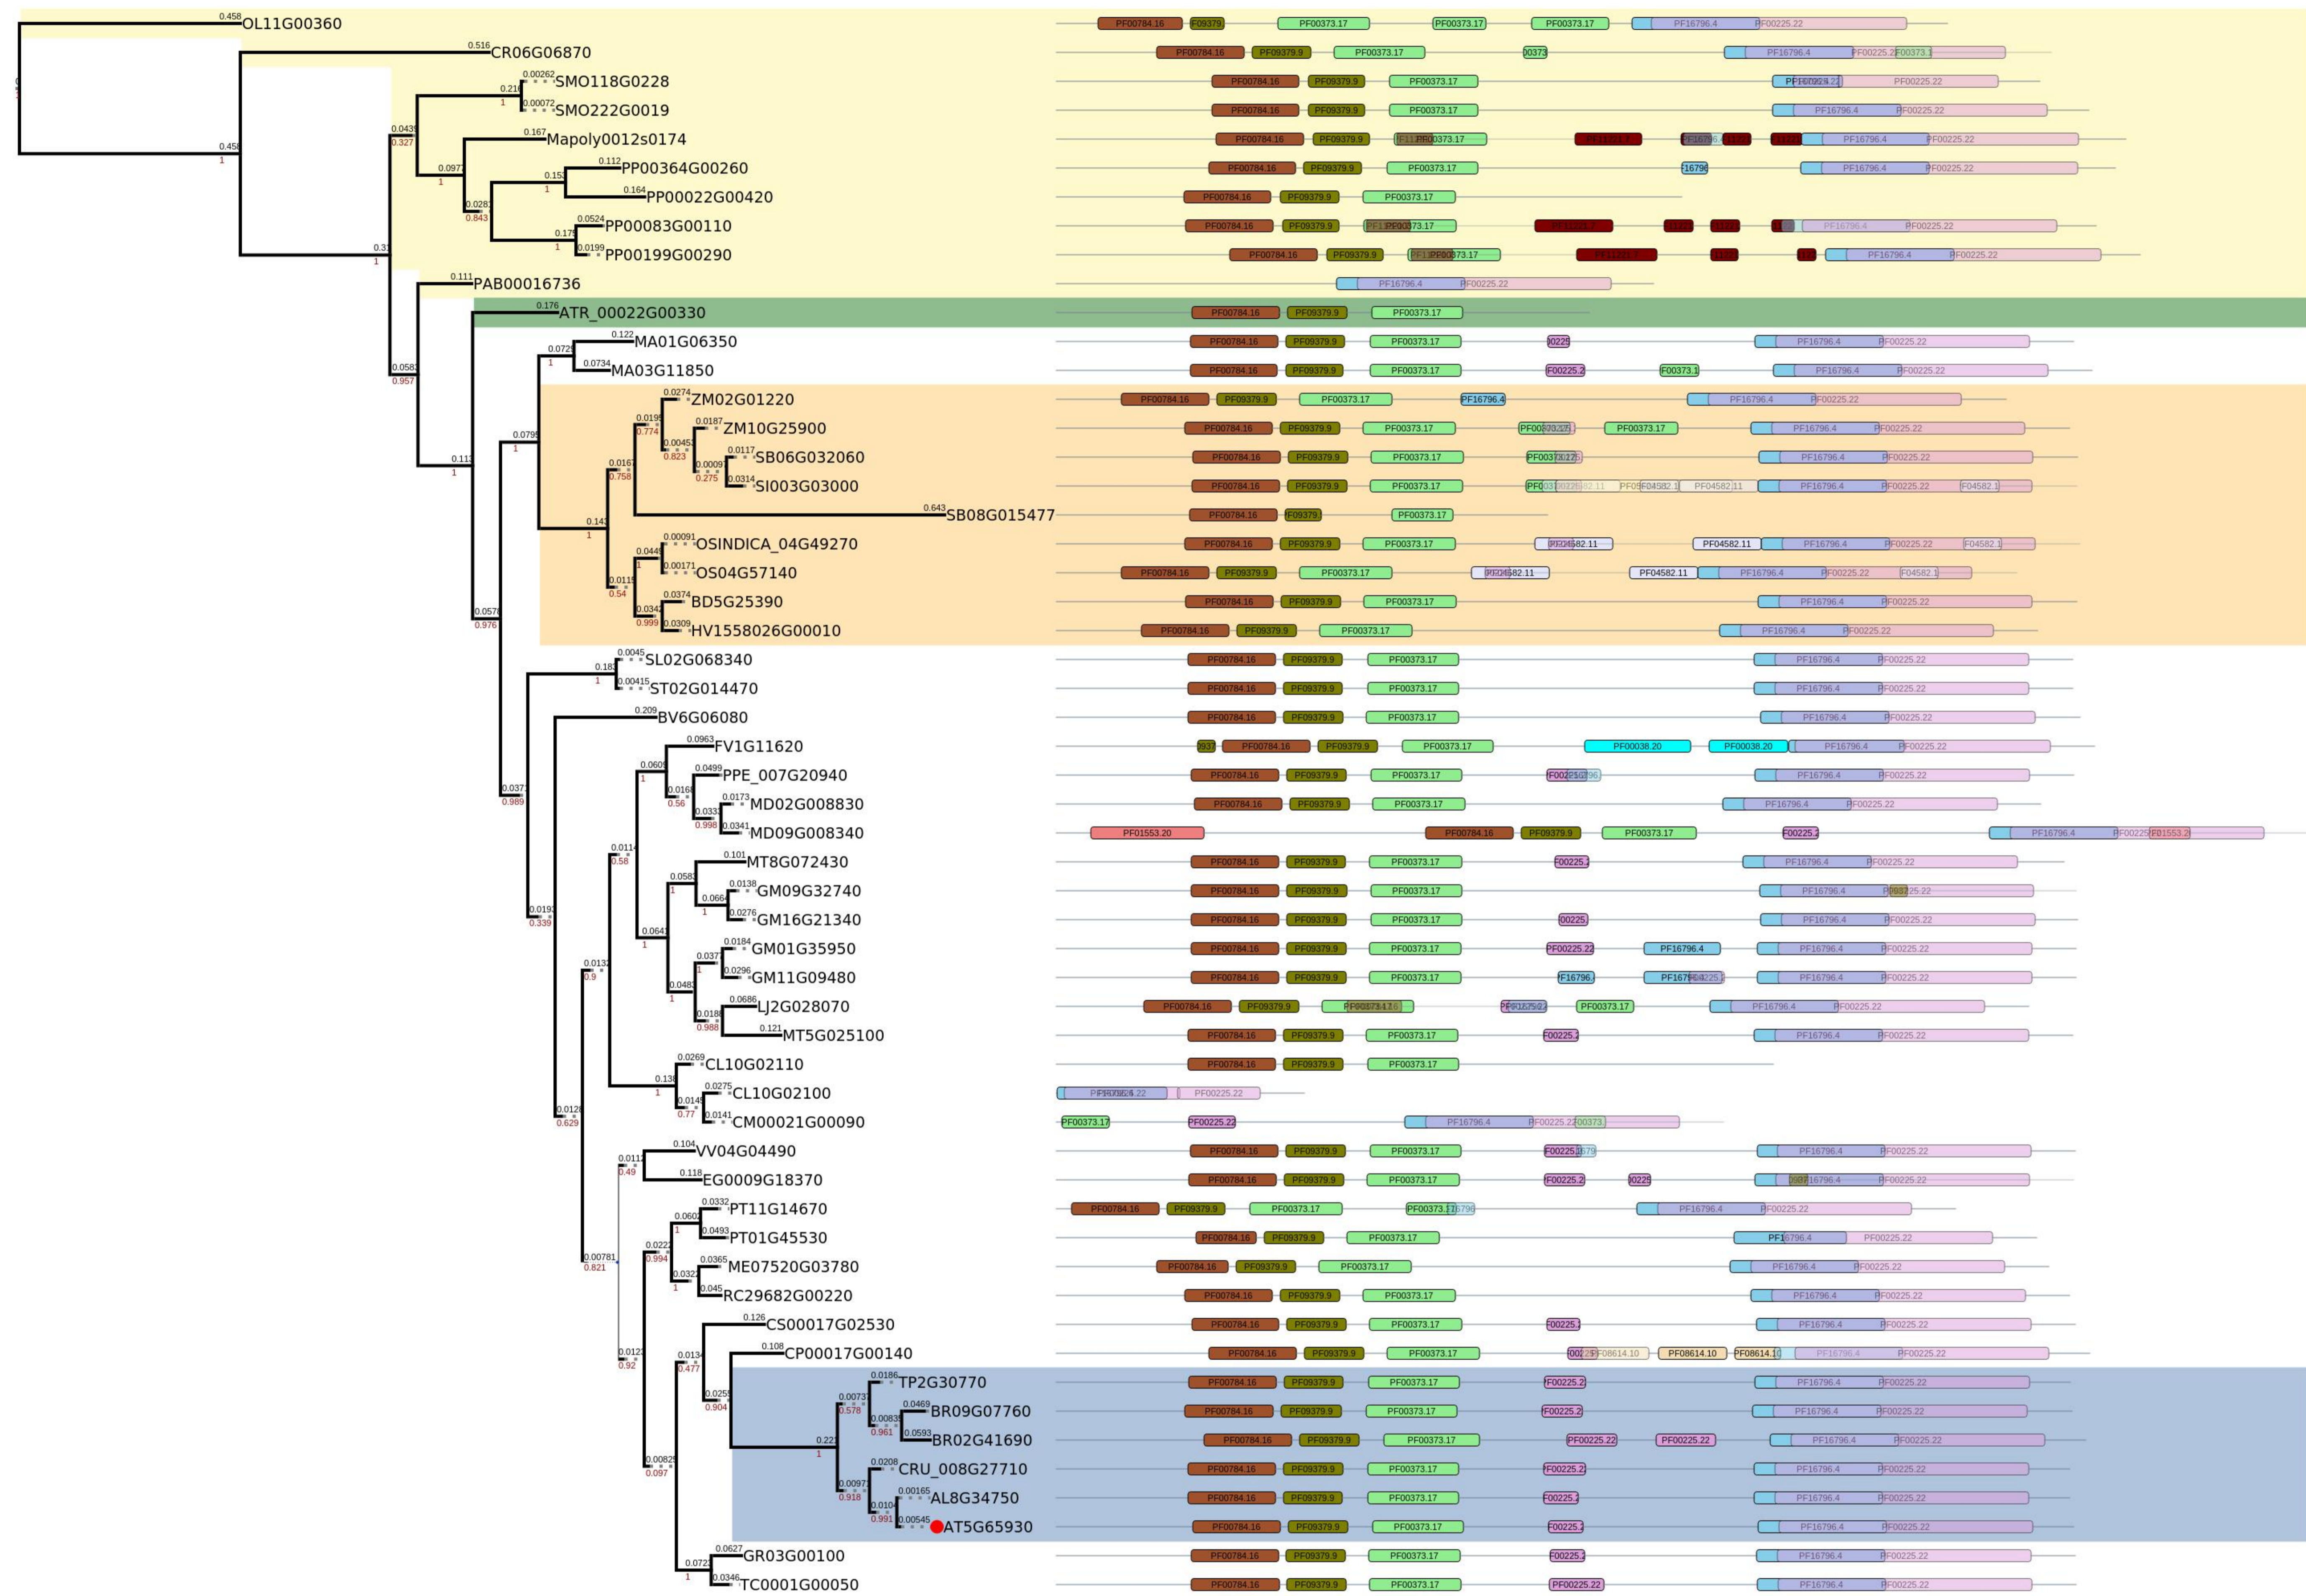

taxonpmic identity of protein

domain architecture

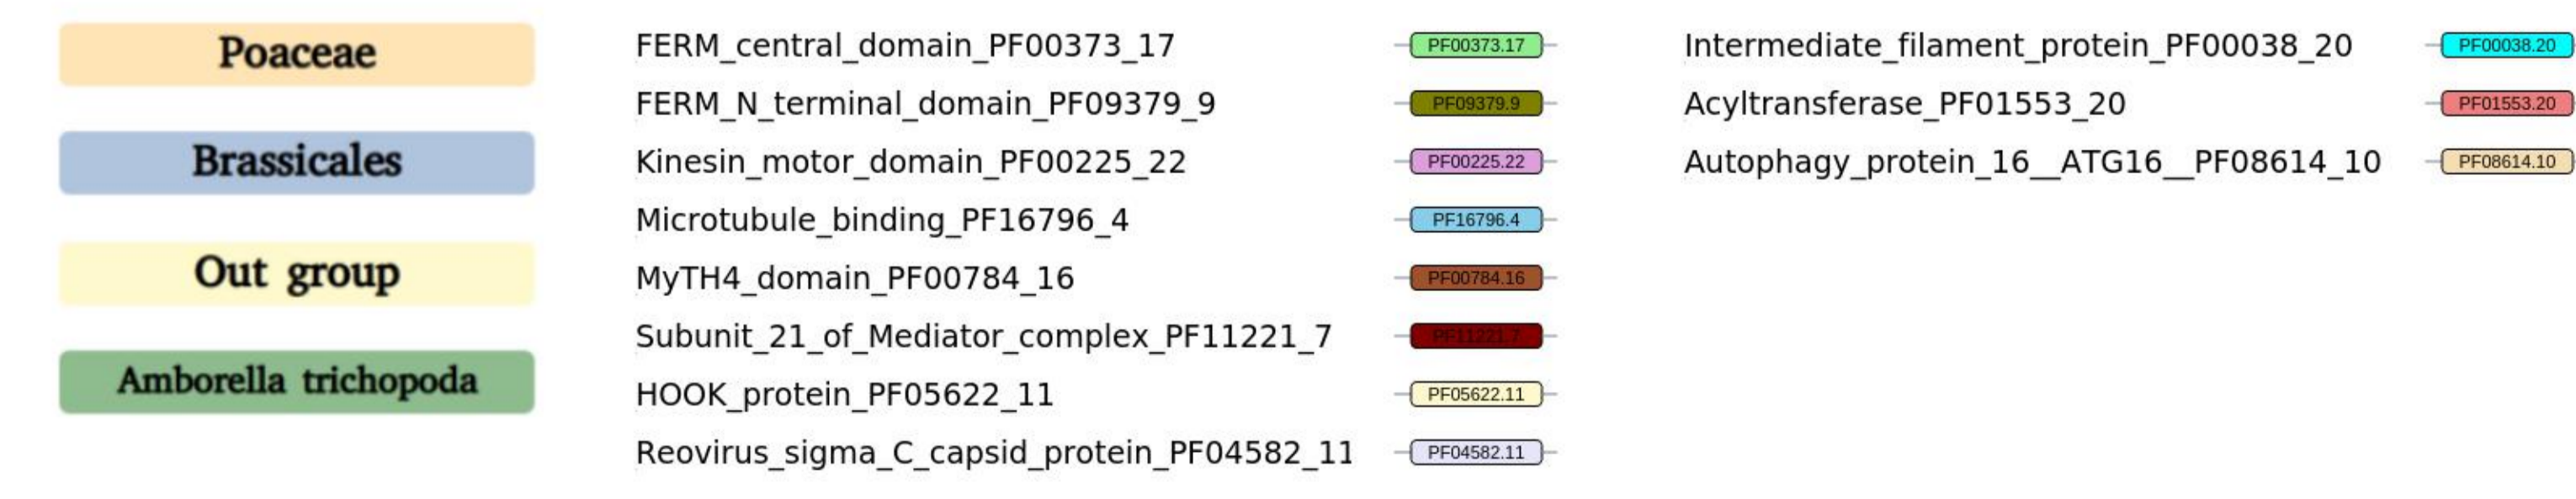

Supplement: 12870_2019_1640_MOESM12_ESM.pdf [file 12870_2019_1640_MOESM12_ESM.pdf]
