# Supplementary material for: The evolution of gene regulatory networks controlling Arabidopsis thaliana L. trichome development
Source: PubMed Central journal article supplement (PMC6393967; doi:10.1186/s12870-019-1640-2), 2019-02-15
Supplement: 12870_2019_1640_MOESM7_ESM.pdf [file 12870_2019_1640_MOESM7_ESM.pdf]

**Figure S5.** PhyML phylogenetic relations and composition of domains for AT1G01510 homologues of representative plant species. The color legends of species and domains is given below

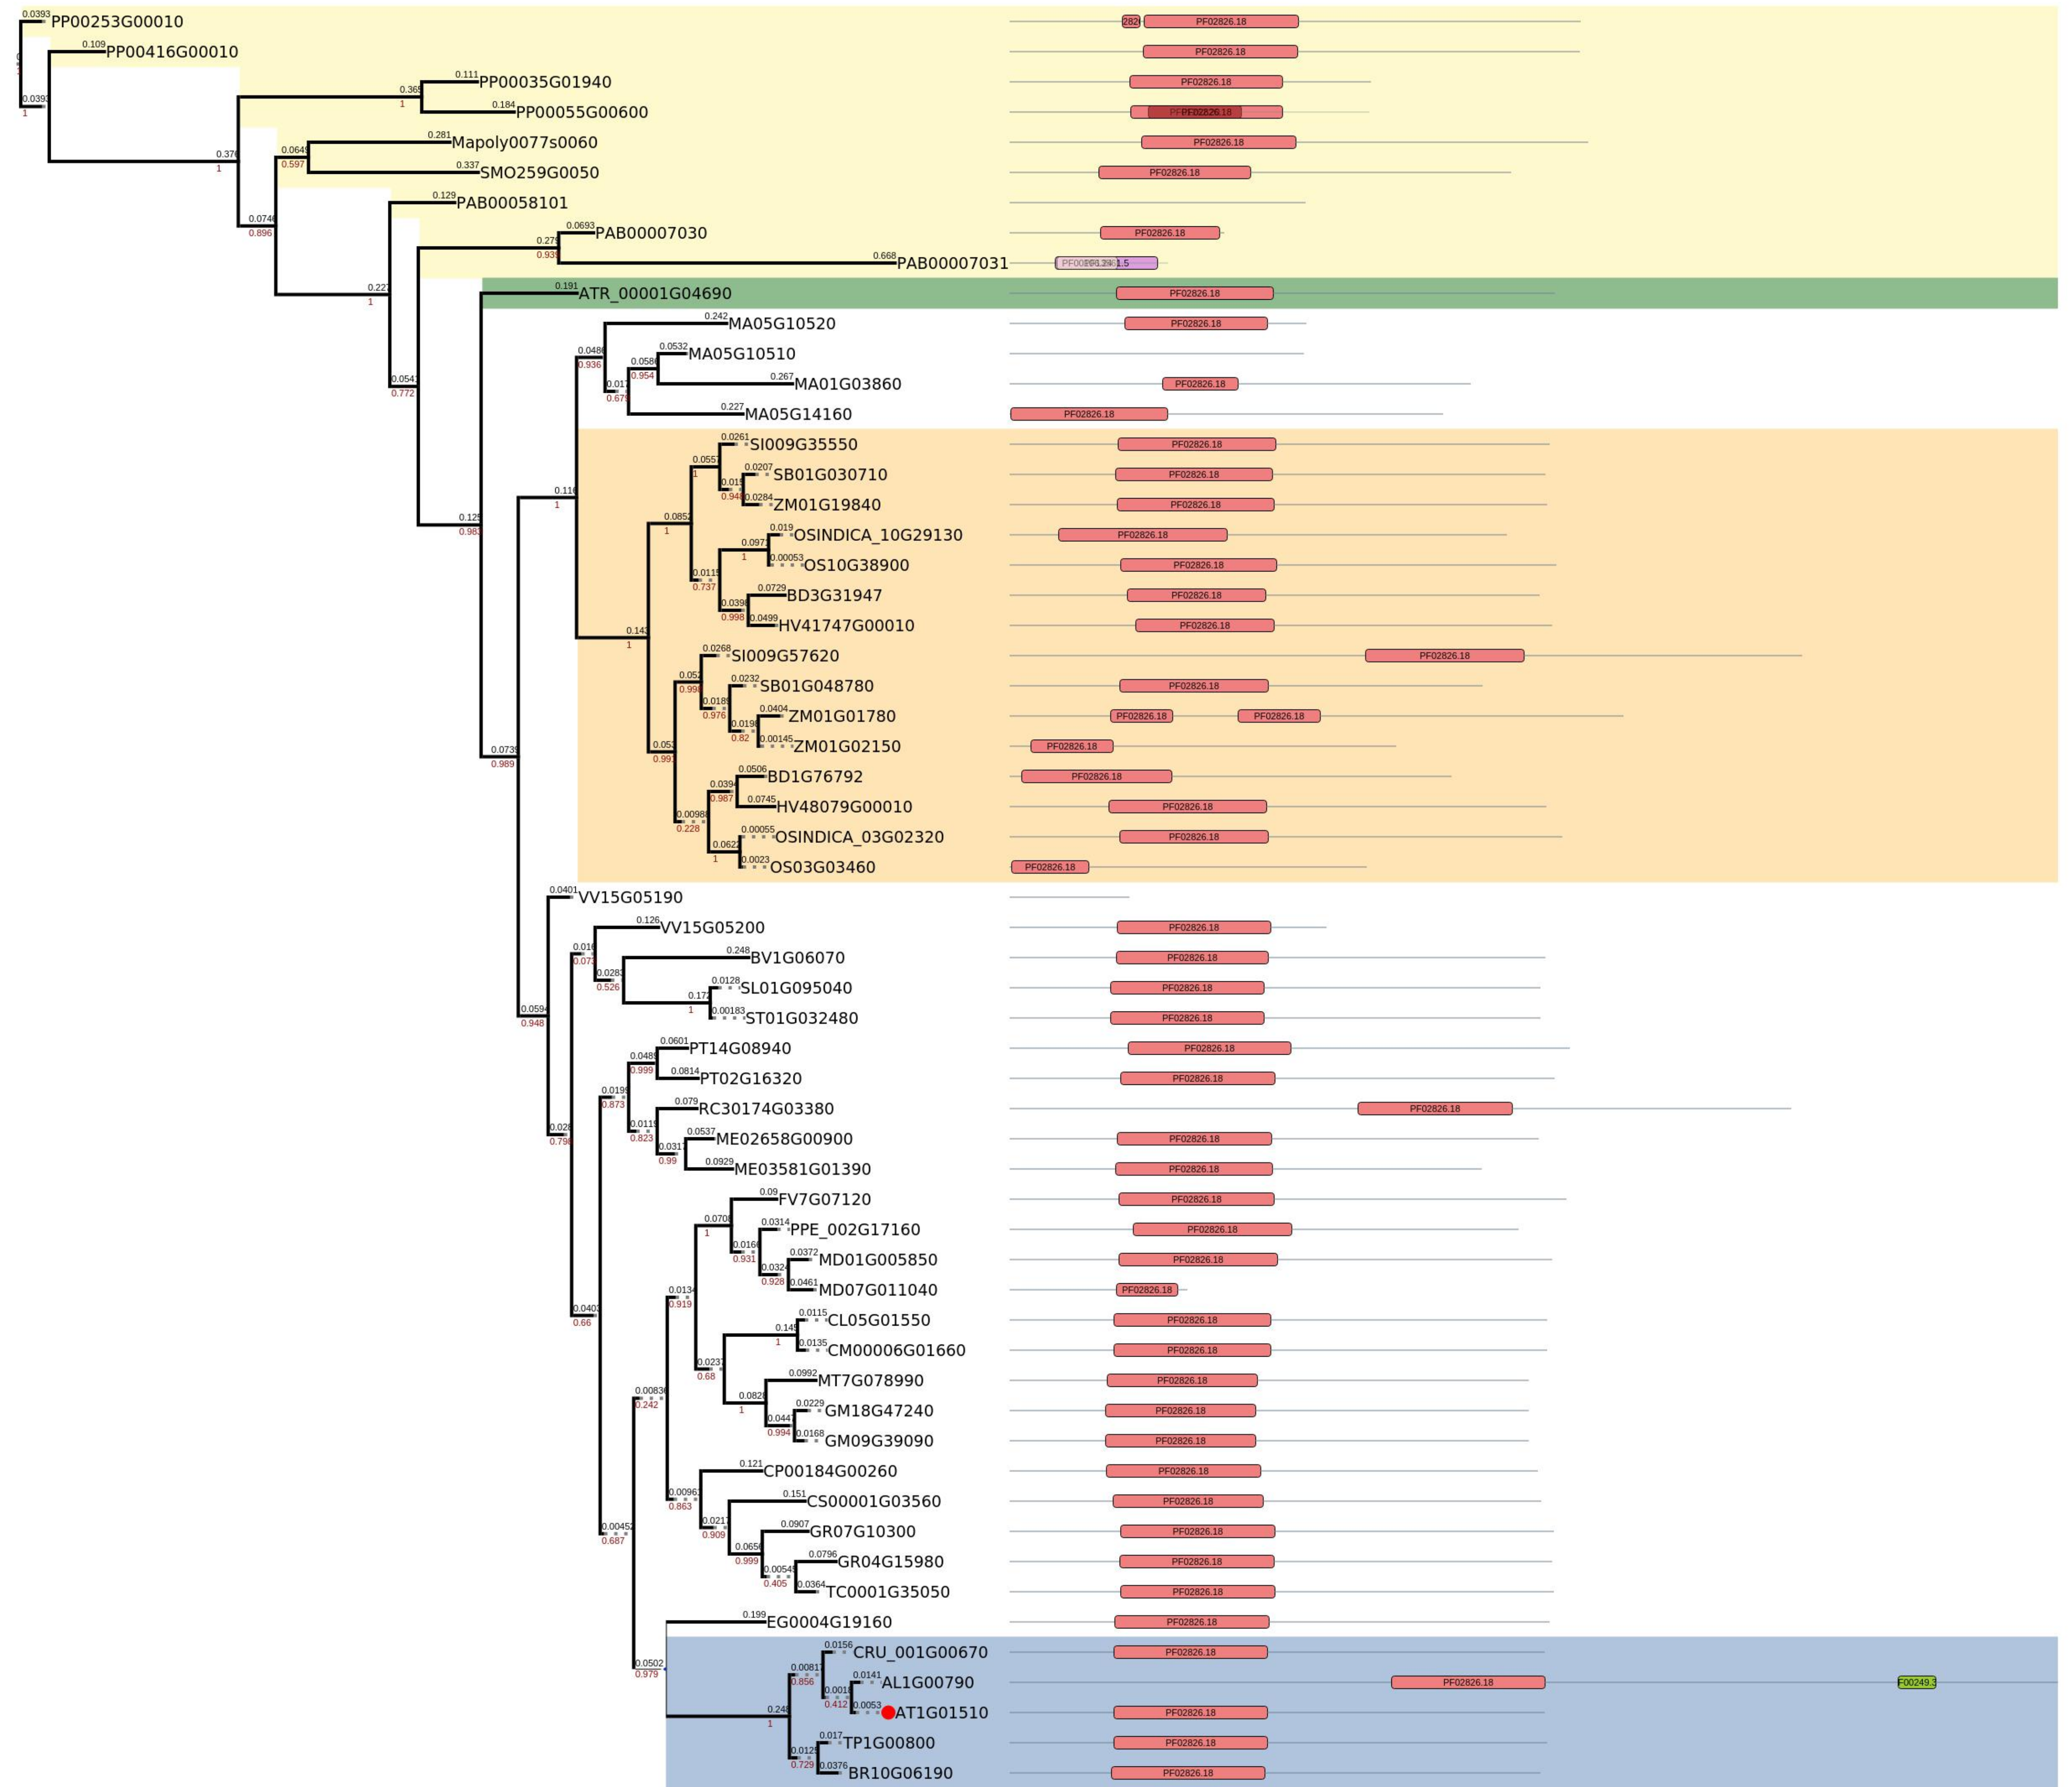

taxonomic identity of protein

domain architecture

- Poaceae**
- Brassicales**
- Out group**
- Amborella trichopoda**

D\_isomer\_specific\_2\_hydroxyacid\_dehydrogenase\_NAD\_binding\_domain\_PF02826\_18  
 Alanine\_dehydrogenase\_PNT\_C\_terminal\_domain\_PF01262\_20  
 short\_chain\_dehydrogenase\_PF00106\_24  
 Enoyl\_Acyl\_carrier\_protein\_reductase\_PF13561\_5  
 Myb\_like\_DNA\_binding\_domain\_PF00249\_30

- PF02826.18
- PF01262.20
- PF00106.24
- PF13561.5
- PF00249.30



**Figure S6.** PhyML phylogenetic relations and composition of domains for AT1G01520 homologues of representative plant species. The color legends of species and domains is given below

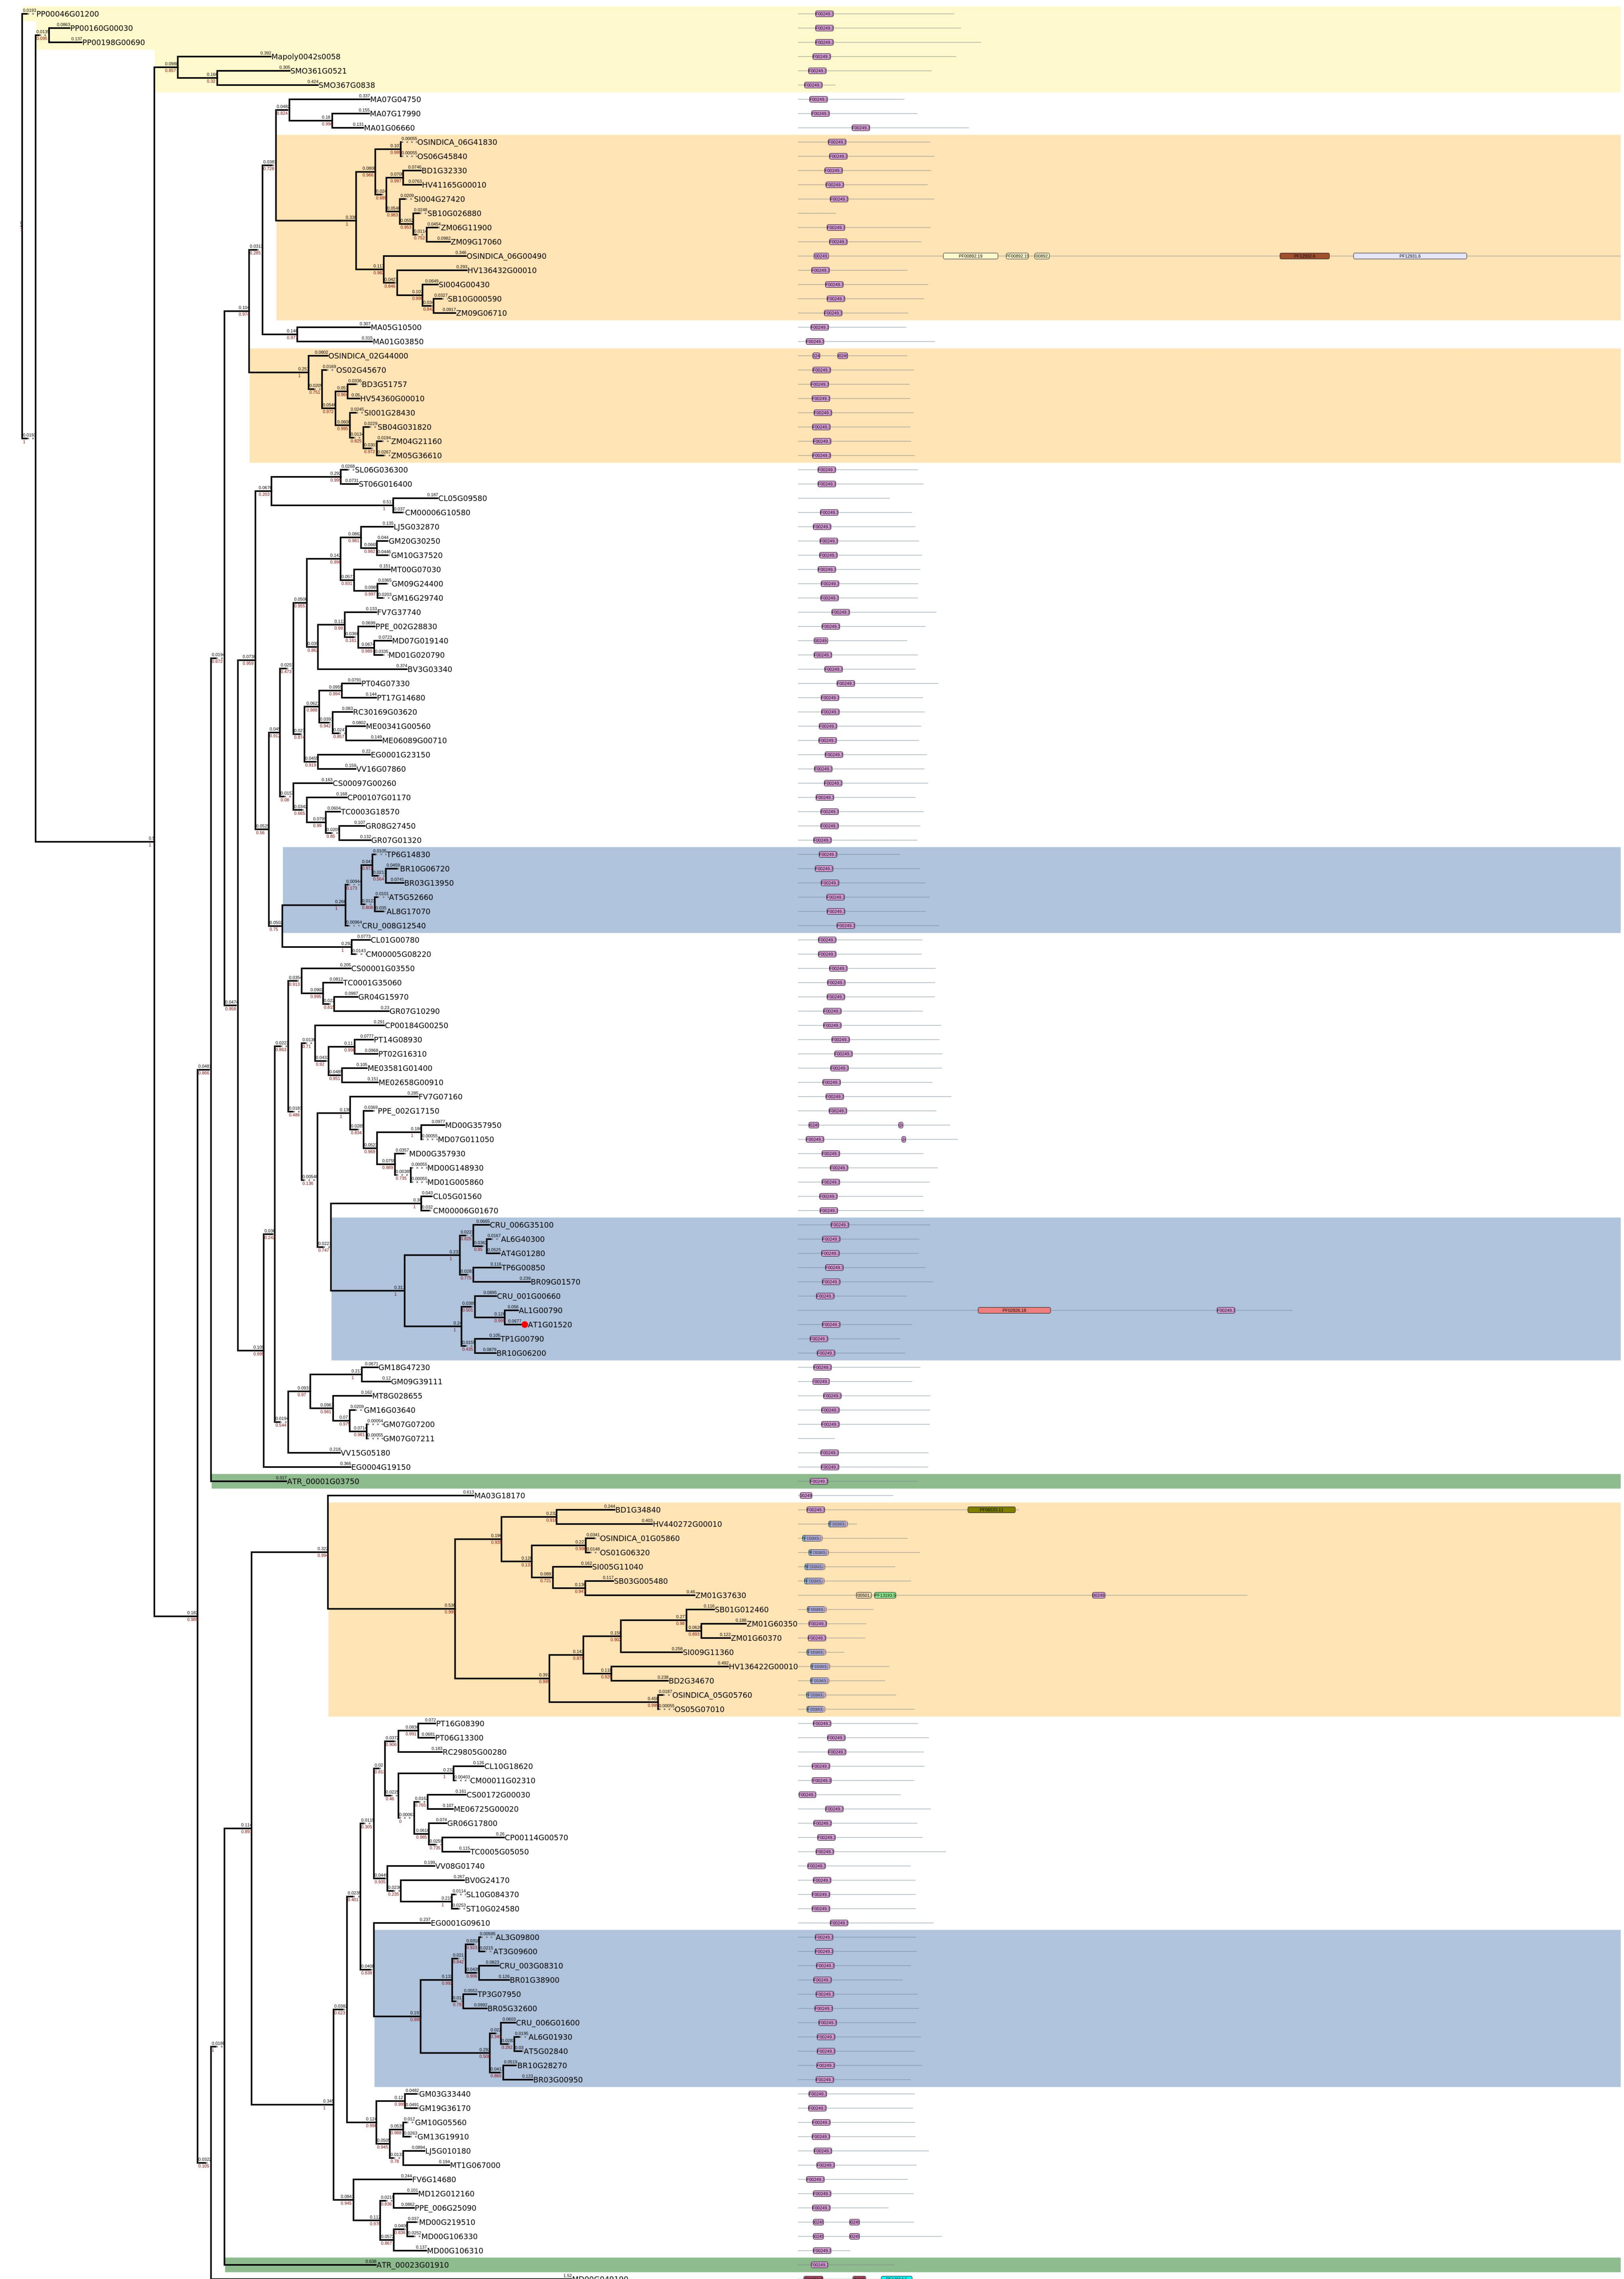

| taxonomic identity of protein | domain architecture                                                         |
|-------------------------------|-----------------------------------------------------------------------------|
| <b>Poaceae</b>                | Myb_like_DNA_binding_domain_FF00249_30                                      |
| <b>Brassicales</b>            | EamA_like_transporter_family_FF00892_19                                     |
| <b>Out group</b>              | Vesicle_coat_trafficking_protein_Sec16_mid_region_PF12932_6                 |
| <b>Amborella trichopoda</b>   | Sec23_binding_domain_of_Sec16_FF12931_6                                     |
|                               | D_isomer_specific_2_hydroxyacid_dehydrogenase_NAD_binding_domain_FF02826_18 |
|                               | Protein_of_unknown_function_DUF1110_FF06533_11                              |
|                               | Myb_DNA_binding_like_FF15963_4                                              |
|                               | AMP_binding_enzyme_FF00501_27                                               |

|          |                                                |
|----------|------------------------------------------------|
| PF000490 | AMP_binding_enzyme_C_terminal_domain_PF13193_5 |
| PF000491 | Domain_of_unknown_function_DUF4149_FF13664_5   |
| PF000492 | Myb_like_DNA_binding_domain_PF13921_5          |
| PF000493 |                                                |
| PF000494 |                                                |
| PF000495 |                                                |
| PF000496 |                                                |
| PF000497 |                                                |
| PF000498 |                                                |
| PF000499 |                                                |
| PF000500 |                                                |
| PF000501 |                                                |
| PF000502 |                                                |
| PF000503 |                                                |
| PF000504 |                                                |
| PF000505 |                                                |
| PF000506 |                                                |
| PF000507 |                                                |
| PF000508 |                                                |
| PF000509 |                                                |
| PF000510 |                                                |
| PF000511 |                                                |
| PF000512 |                                                |
| PF000513 |                                                |
| PF000514 |                                                |
| PF000515 |                                                |
| PF000516 |                                                |
| PF000517 |                                                |
| PF000518 |                                                |
| PF000519 |                                                |
| PF000520 |                                                |
| PF000521 |                                                |
| PF000522 |                                                |
| PF000523 |                                                |
| PF000524 |                                                |
| PF000525 |                                                |
| PF000526 |                                                |
| PF000527 |                                                |
| PF000528 |                                                |
| PF000529 |                                                |
| PF000530 |                                                |
| PF000531 |                                                |
| PF000532 |                                                |
| PF000533 |                                                |
| PF000534 |                                                |
| PF000535 |                                                |
| PF000536 |                                                |
| PF000537 |                                                |
| PF000538 |                                                |
| PF000539 |                                                |
| PF000540 |                                                |
| PF000541 |                                                |
| PF000542 |                                                |
| PF000543 |                                                |
| PF000544 |                                                |
| PF000545 |                                                |
| PF000546 |                                                |
| PF000547 |                                                |
| PF000548 |                                                |
| PF000549 |                                                |
| PF000550 |                                                |
| PF000551 |                                                |
| PF000552 |                                                |
| PF000553 |                                                |
| PF000554 |                                                |
| PF000555 |                                                |
| PF000556 |                                                |
| PF000557 |                                                |
| PF000558 |                                                |
| PF000559 |                                                |
| PF000560 |                                                |
| PF000561 |                                                |
| PF000562 |                                                |
| PF000563 |                                                |
| PF000564 |                                                |
| PF000565 |                                                |
| PF000566 |                                                |
| PF000567 |                                                |
| PF000568 |                                                |
| PF000569 |                                                |
| PF000570 |                                                |
| PF000571 |                                                |
| PF000572 |                                                |
| PF000573 |                                                |
| PF000574 |                                                |
| PF000575 |                                                |
| PF000576 |                                                |
| PF000577 |                                                |
| PF000578 |                                                |
| PF000579 |                                                |
| PF000580 |                                                |
| PF000581 |                                                |
| PF000582 |                                                |
| PF000583 |                                                |
| PF000584 |                                                |
| PF000585 |                                                |
| PF000586 |                                                |
| PF000587 |                                                |
| PF000588 |                                                |
| PF000589 |                                                |
| PF000590 |                                                |
| PF000591 |                                                |
| PF000592 |                                                |
| PF000593 |                                                |
| PF000594 |                                                |
| PF000595 |                                                |
| PF000596 |                                                |
| PF000597 |                                                |
| PF000598 |                                                |
| PF000599 |                                                |
| PF000600 |                                                |
| PF000601 |                                                |
| PF000602 |                                                |
| PF000603 |                                                |
| PF000604 |                                                |
| PF000605 |                                                |
| PF000606 |                                                |
| PF000607 |                                                |
| PF000608 |                                                |
| PF000609 |                                                |
| PF000610 |                                                |
| PF000611 |                                                |
| PF000612 |                                                |
| PF000613 |                                                |
| PF000614 |                                                |
| PF000615 |                                                |
| PF000616 |                                                |
| PF000617 |                                                |
| PF000618 |                                                |
| PF000619 |                                                |
| PF000620 |                                                |
| PF000621 |                                                |
| PF000622 |                                                |
| PF000623 |                                                |
| PF000624 |                                                |
| PF000625 |                                                |
| PF000626 |                                                |
| PF000627 |                                                |
| PF000628 |                                                |
| PF000629 |                                                |
| PF000630 |                                                |
| PF000631 |                                                |
| PF000632 |                                                |
| PF000633 |                                                |
| PF000634 |                                                |
| PF000635 |                                                |
| PF000636 |                                                |
| PF000637 |                                                |
| PF000638 |                                                |
| PF000639 |                                                |
| PF000640 |                                                |
| PF000641 |                                                |
| PF000642 |                                                |
| PF000643 |                                                |
| PF000644 |                                                |
| PF000645 |                                                |
| PF000646 |                                                |
| PF000647 |                                                |
| PF000648 |                                                |
| PF000649 |                                                |
| PF000650 |                                                |
| PF000651 |                                                |
| PF000652 |                                                |
| PF000653 |                                                |
| PF000654 |                                                |
| PF000655 |                                                |
| PF000656 |                                                |
| PF000657 |                                                |
| PF000658 |                                                |
| PF000659 |                                                |
| PF000660 |                                                |
| PF000661 |                                                |
| PF000662 |                                                |
| PF000663 |                                                |
| PF000664 |                                                |
| PF000665 |                                                |
| PF000666 |                                                |
| PF000667 |                                                |
| PF000668 |                                                |
| PF000669 |                                                |
| PF000670 |                                                |
| PF000671 |                                                |
| PF000672 |                                                |
| PF000673 |                                                |
| PF000674 |                                                |
| PF000675 |                                                |
| PF000676 |                                                |
| PF000677 |                                                |
| PF000678 |                                                |
| PF000679 |                                                |
| PF000680 |                                                |
| PF000681 |                                                |
| PF000682 |                                                |
| PF000683 |                                                |
| PF000684 |                                                |
| PF000685 |                                                |
| PF000686 |                                                |
| PF000687 |                                                |
| PF000688 |                                                |
| PF000689 |                                                |
| PF000690 |                                                |
| PF000691 |                                                |
| PF000692 |                                                |
| PF000693 |                                                |
| PF000694 |                                                |
| PF000695 |                                                |
| PF000696 |                                                |
| PF000697 |                                                |
| PF000698 |                                                |
| PF000699 |                                                |
| PF000700 |                                                |



**Figure S7.** PhyML phylogenetic relations and composition of domains for AT1G03060 homologues of representative plant species. The color legends of species and domains is given below

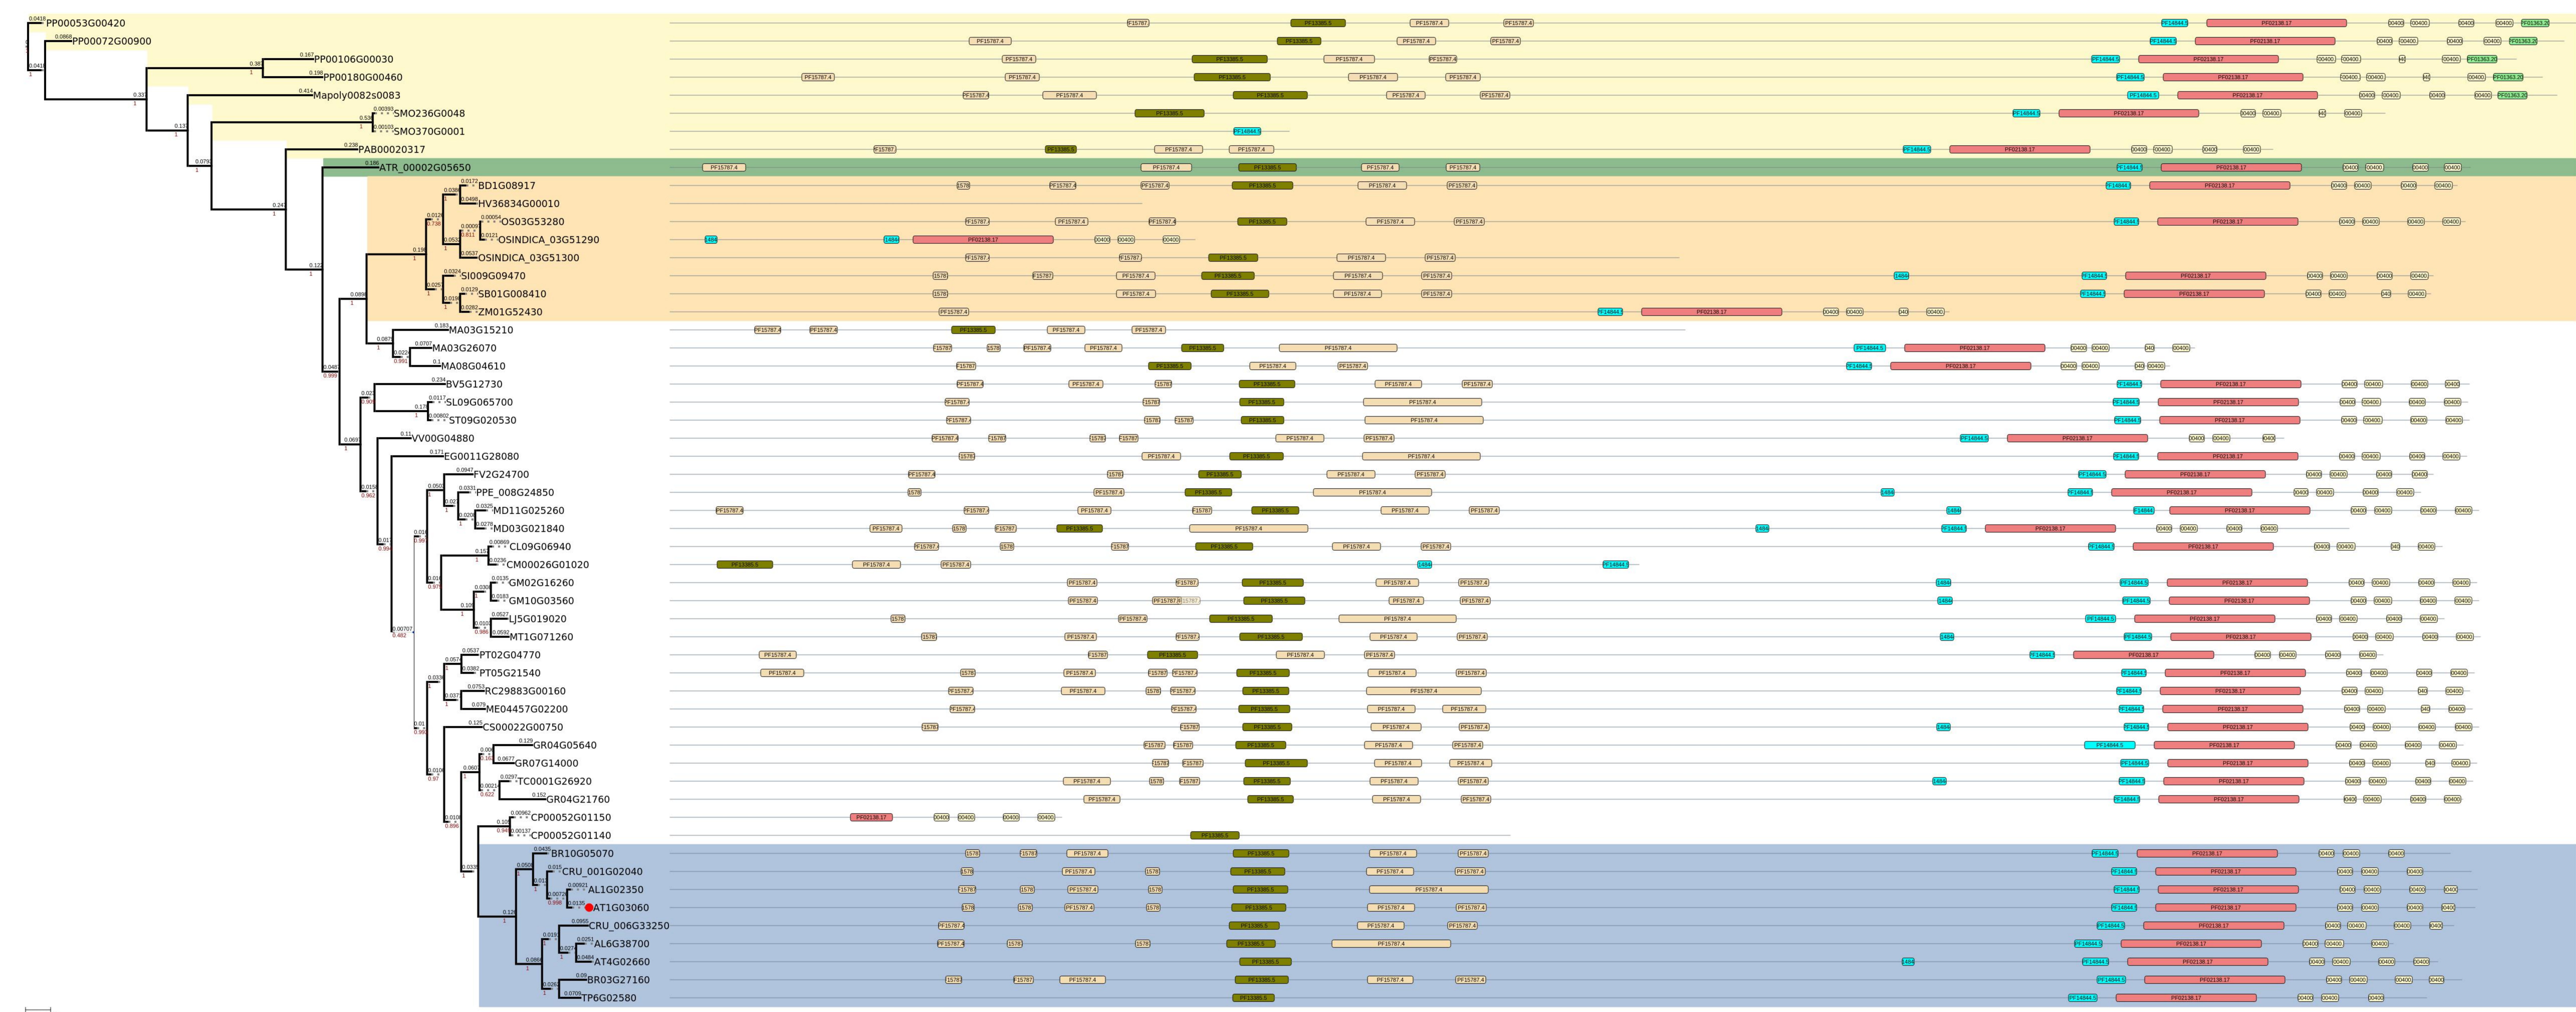

**taxonpmic identity of protein**

- Poaceae** (Yellow background): Beige\_BEACH\_domain\_PFO2138\_17
- Brassicales** (Blue background): Domain\_of\_unknown\_function\_DUF4704\_PFI5787\_4
- Out group** (Light Yellow background): FYVE\_zinc\_finger\_PFO1363\_20
- Amborella trichopoda** (Green background): Concanavalin\_A\_like\_lectin\_glucanases\_superfamily\_PFI3385\_5

**domain architecture**

- PF02138\_17** (Red box)
- PF15787\_4** (Yellow box)
- PF01363\_20** (Green box)
- PF13385\_5** (Green box)
- PF14844\_5** (Cyan box)
- PF0400\_31** (Light Yellow box)



**Figure S8.** PhyML phylogenetic relations and composition of domains for AT1G05230, AT4G21750, AT4G04890, AT1G79840 homologues of representative plant species. The color legends of species and domains is given below

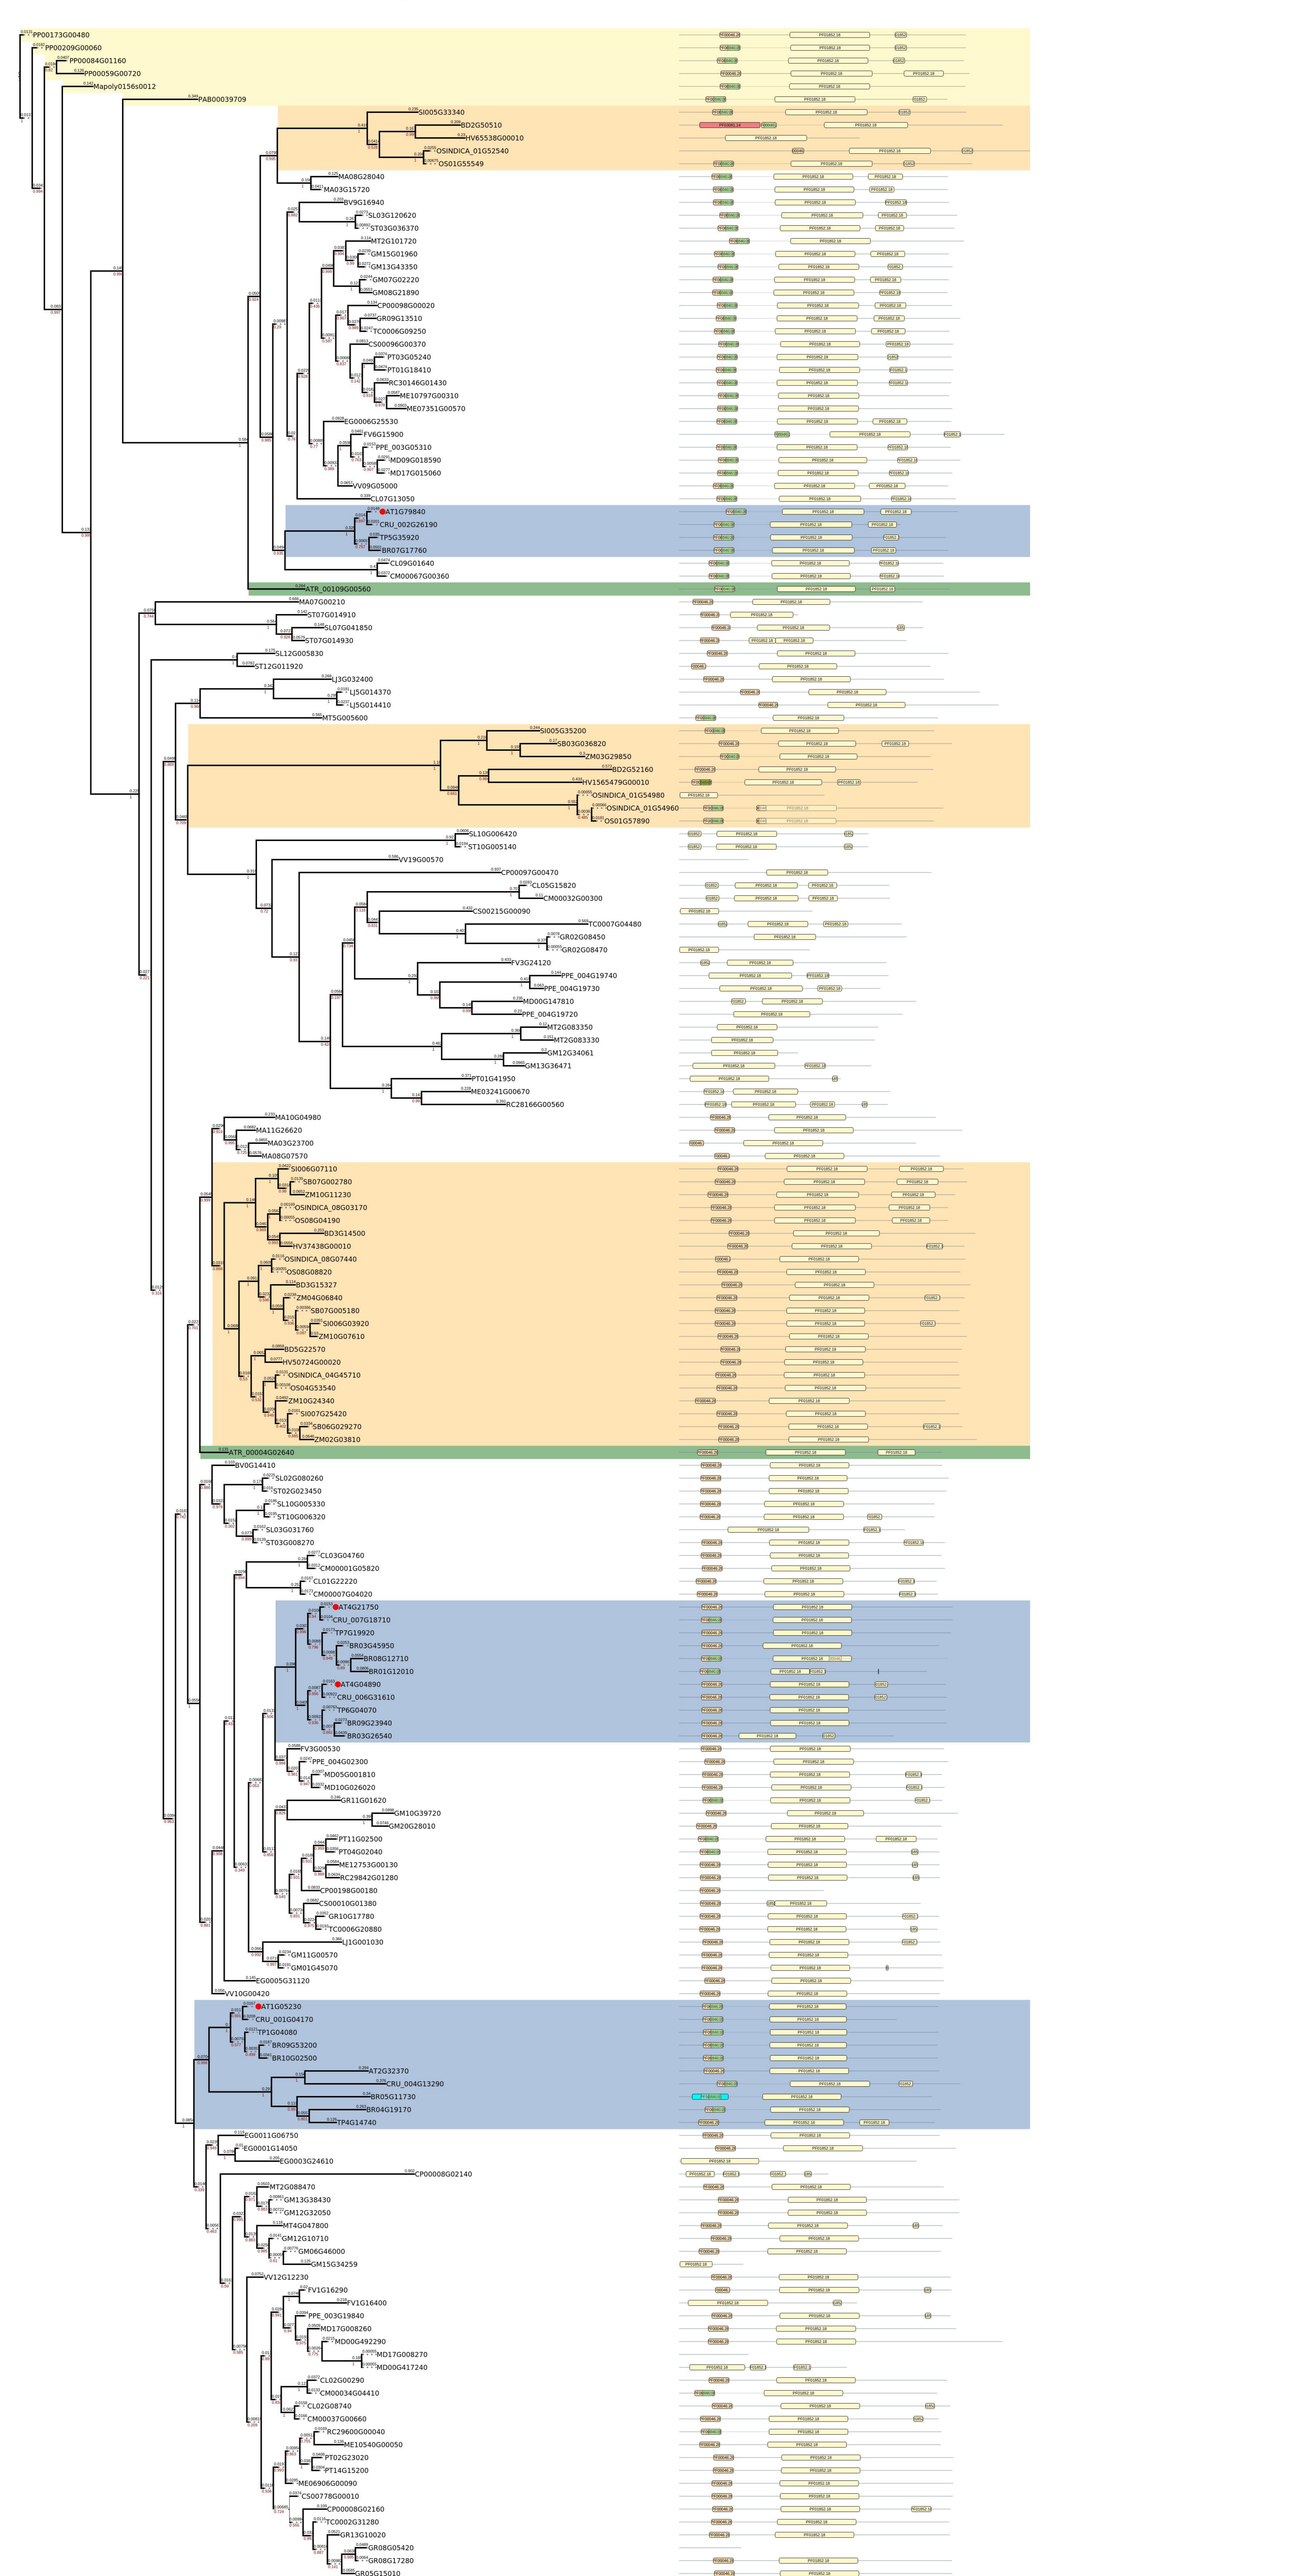

| taxonomic identity of protein | domain architecture                                                                             |
|-------------------------------|-------------------------------------------------------------------------------------------------|
| Poaceae                       | Homeobox_domain_Pf00046_28<br>START_domain_Pf01852_18                                           |
| Brassicales                   | Homeobox_KN_domain_Pf05920_10                                                                   |
| Out group                     | Exo70_exocyst_complex_subunit_Pf03081_14<br>Homeodomain_leucine_zipper_encoding_Homez_Pf11569_7 |
| Amborella trichopoda          | Mitochondrial_ribosomal_protein_subunit_L20_Pf12824_6                                           |



**Figure S9.** PhyML phylogenetic relations and composition of domains for AT1G67030, AT3G58070, AT2G41940, AT5G06650, AT1G10480, AT1G68360 homologues of representative plant species. The color legends of species and domains is given below

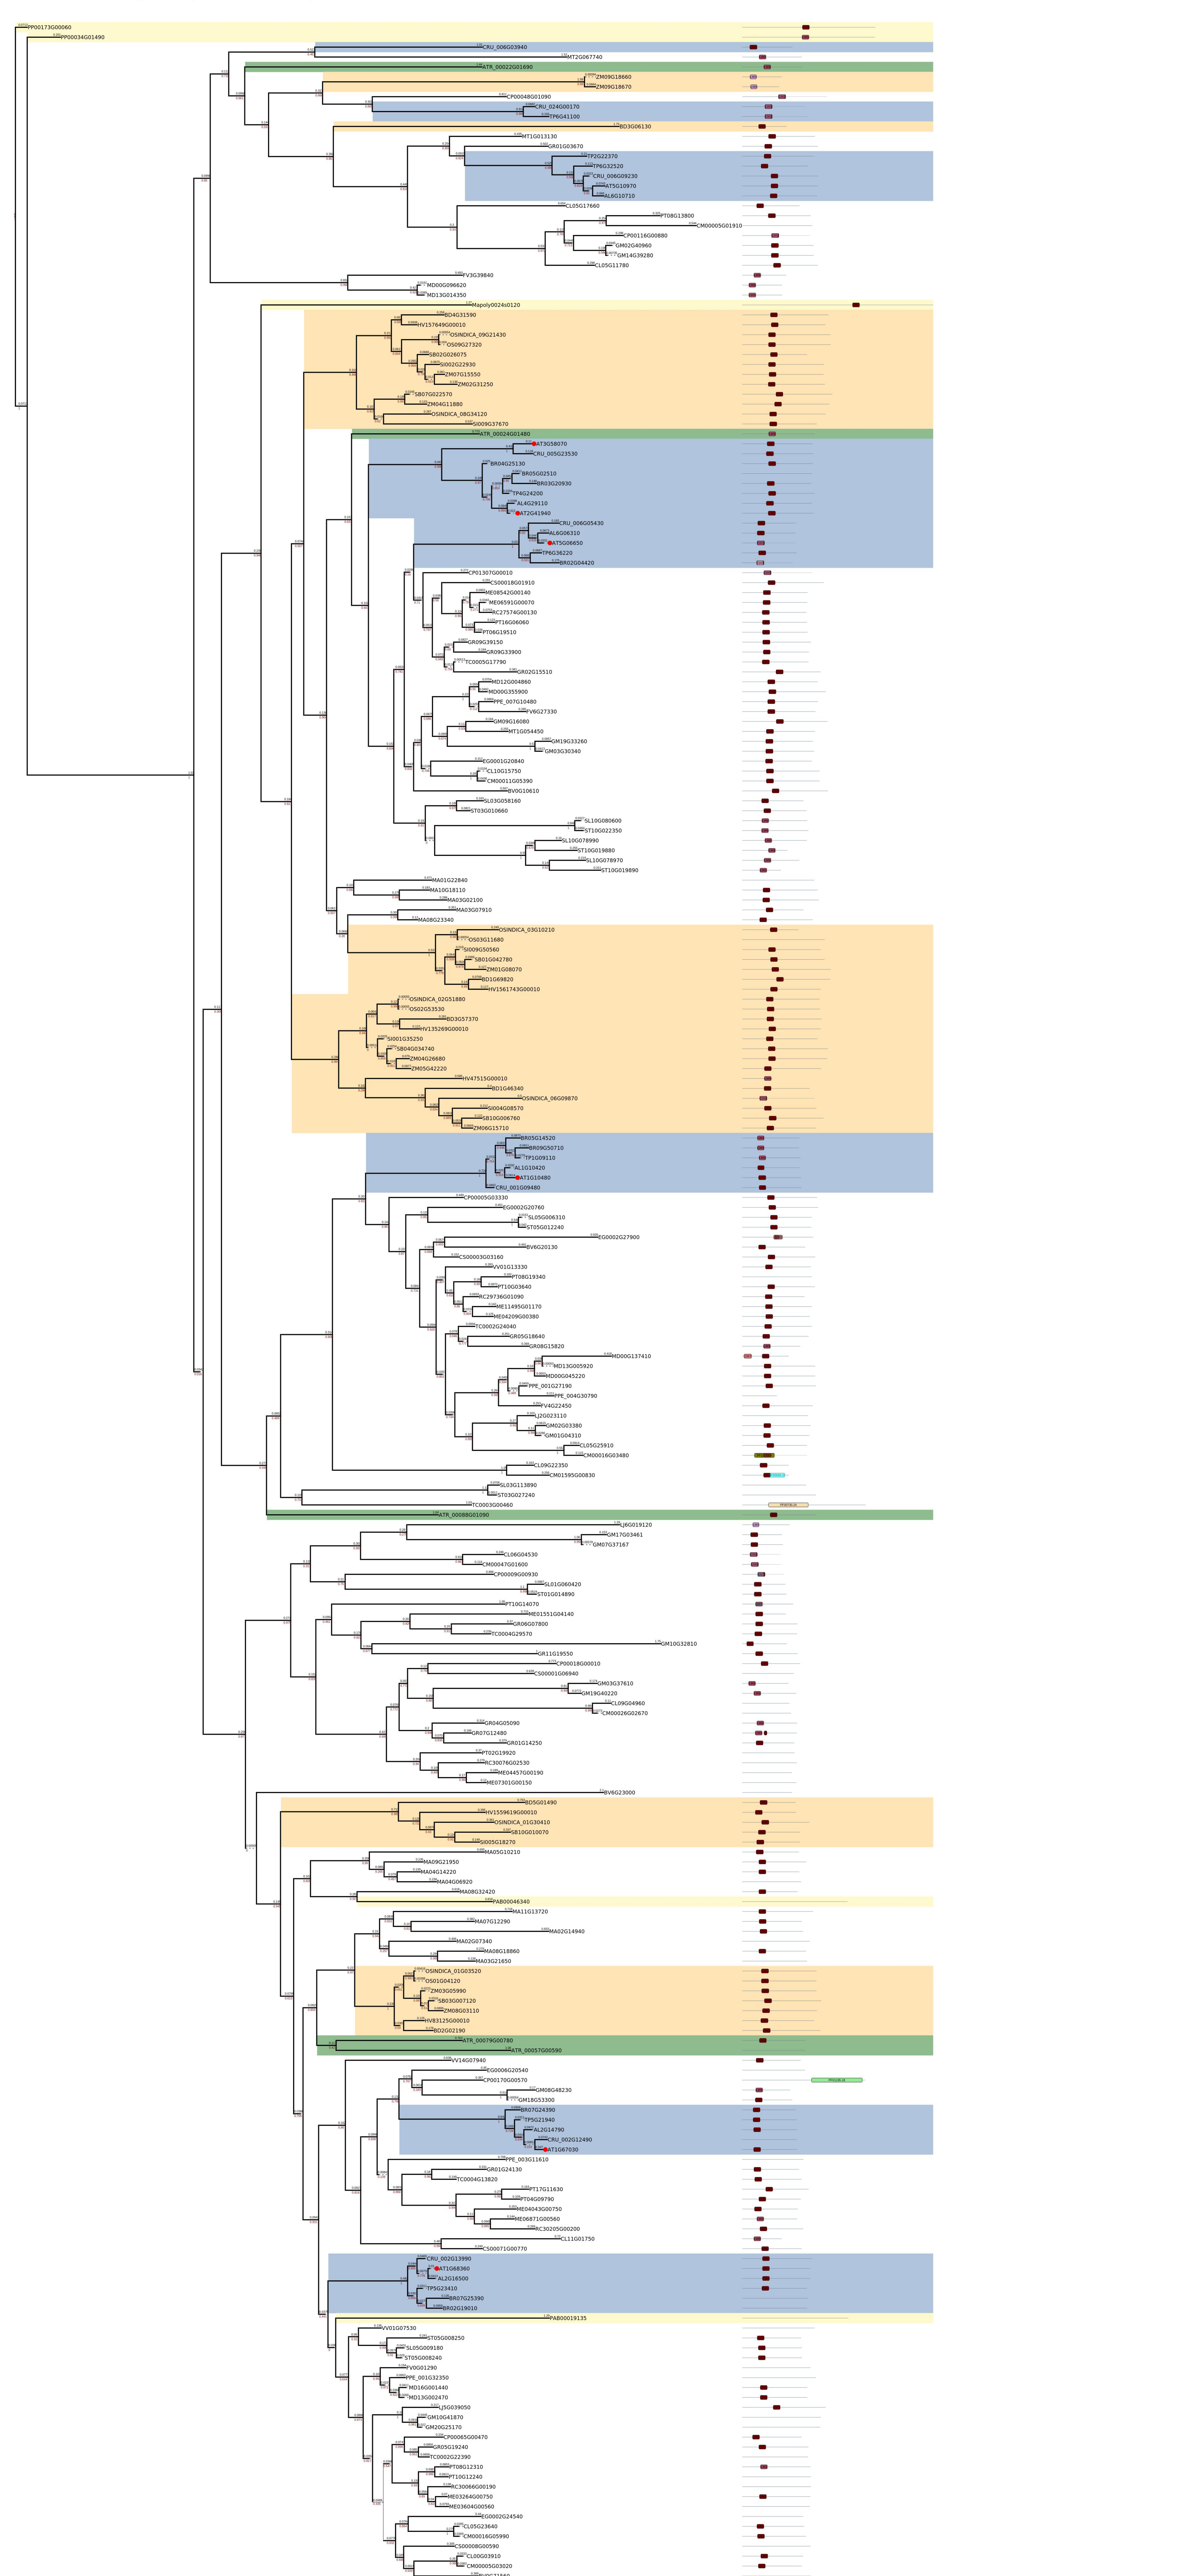

5993330



**Figure S10.** PhyML phylogenetic relations and composition of domains for AT1G13180 homologues of representative plant species. The color legends of species and domains is given below

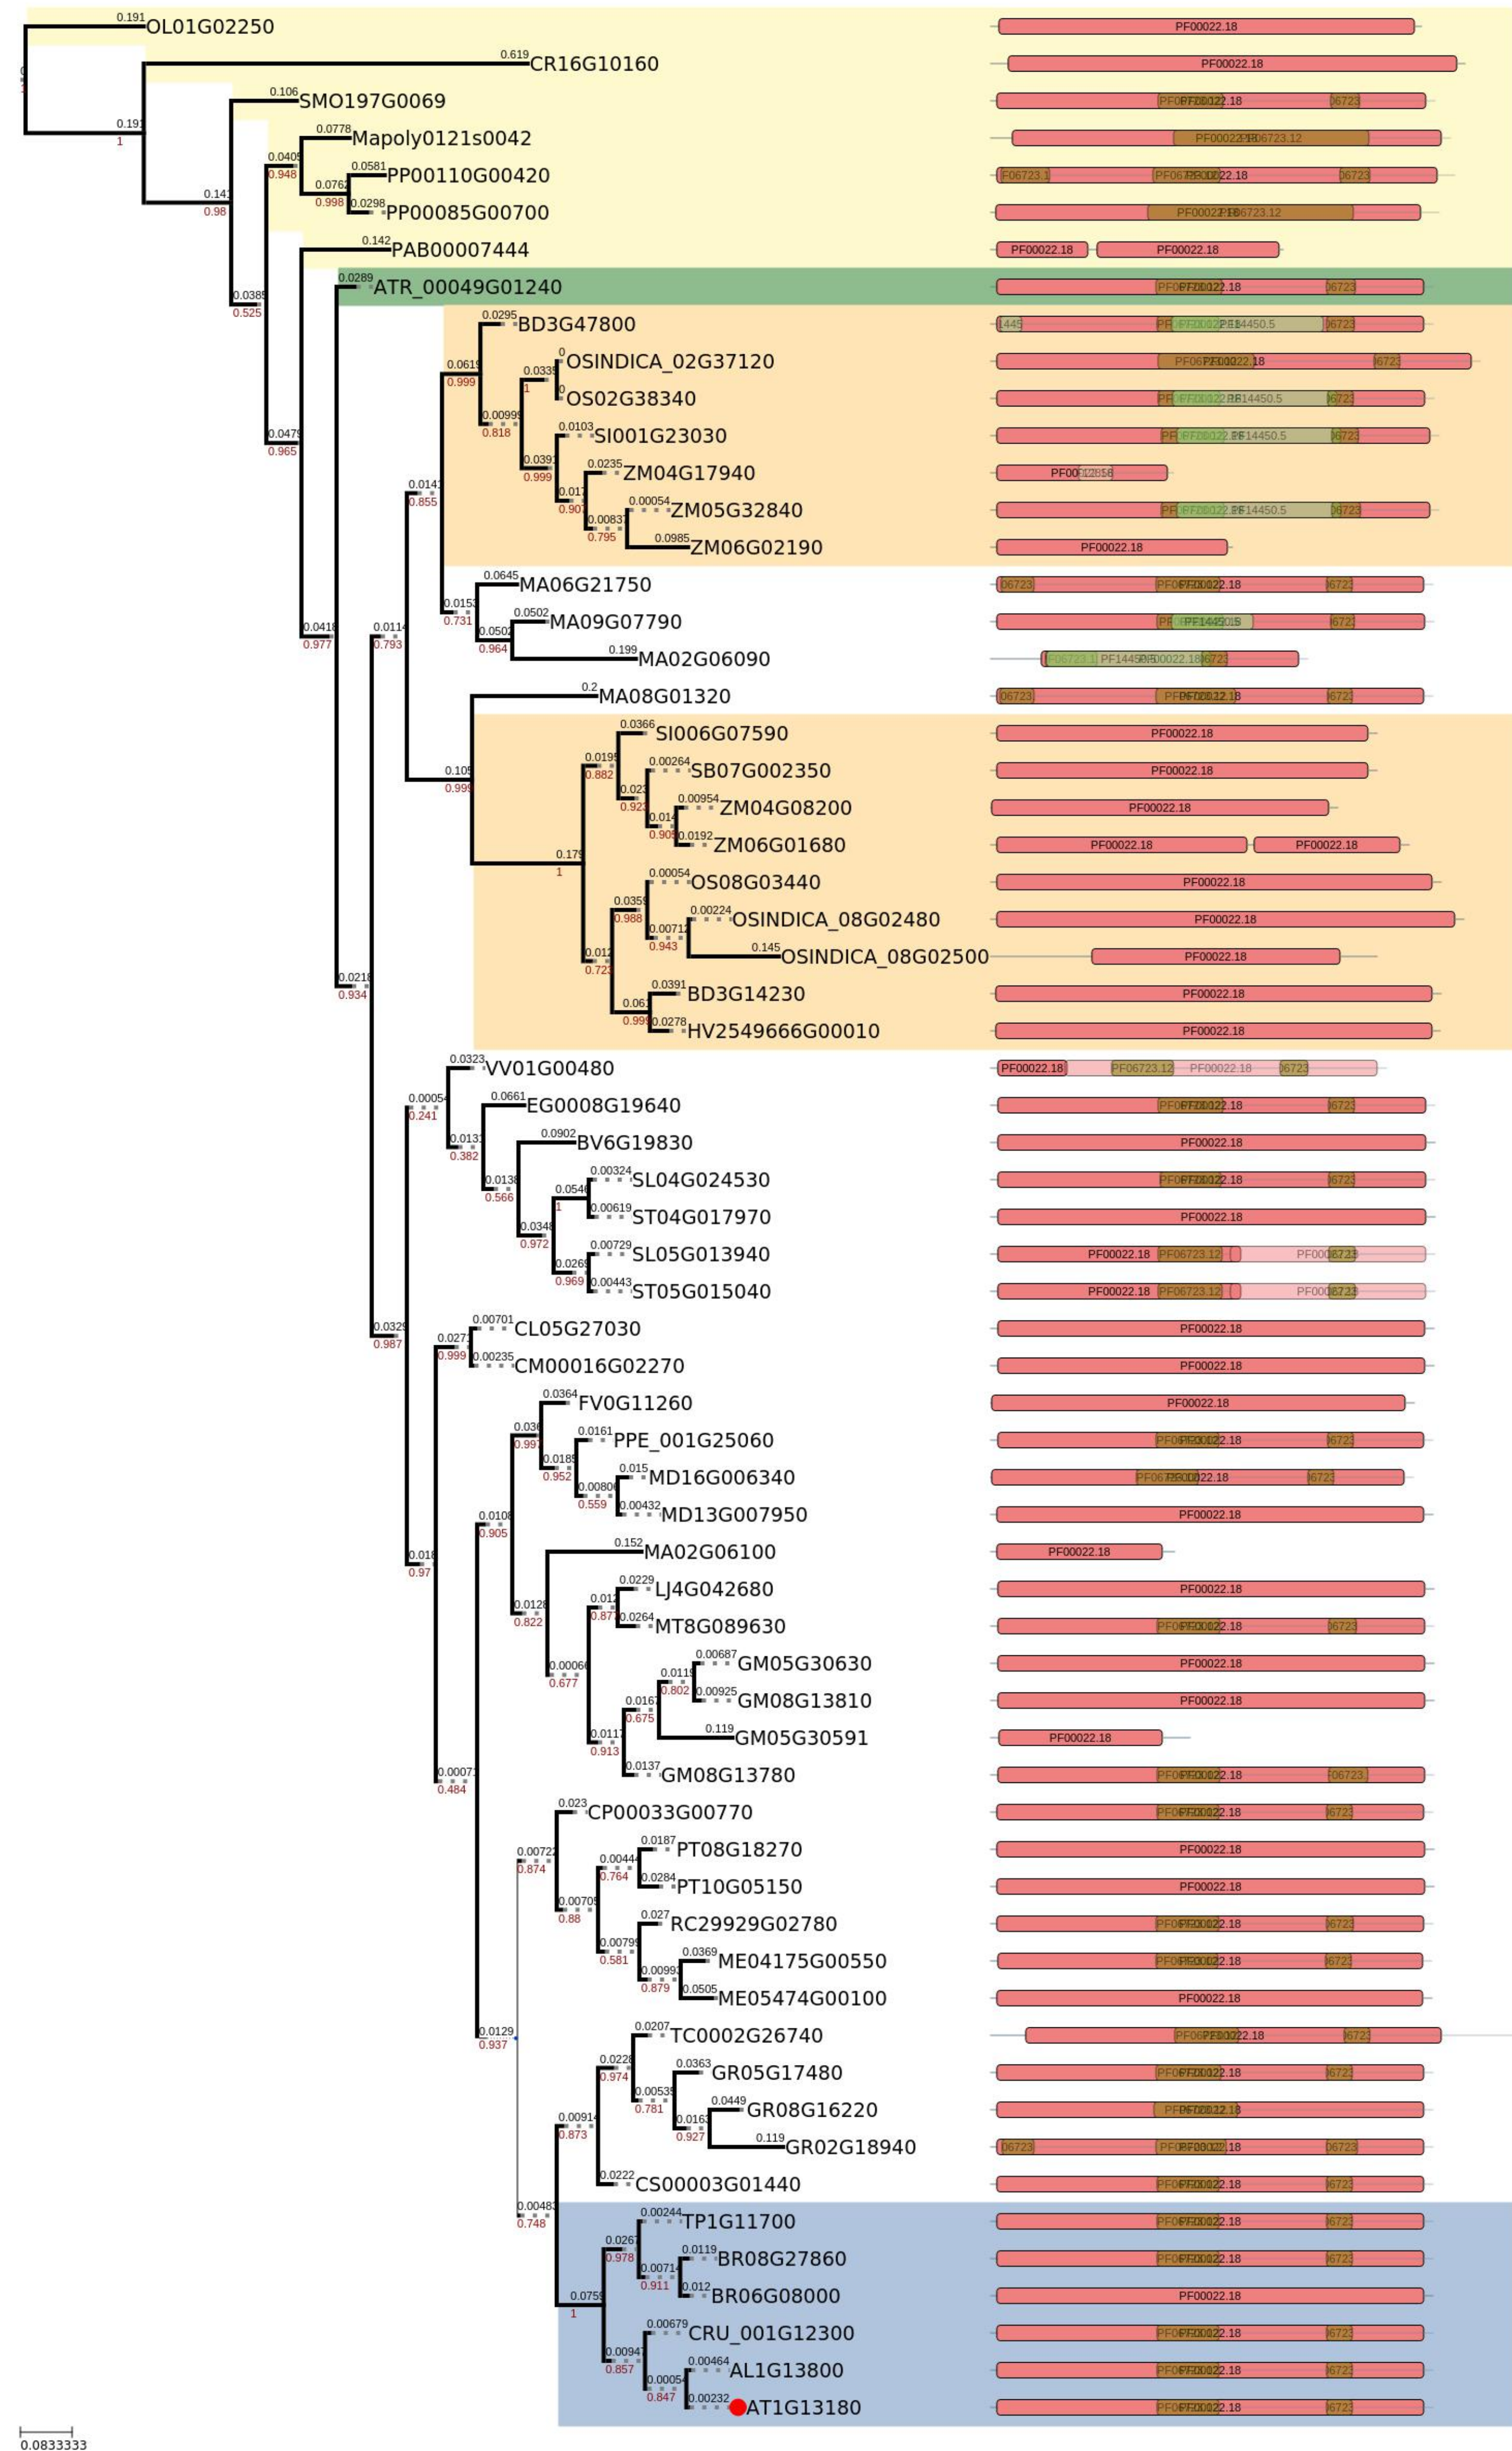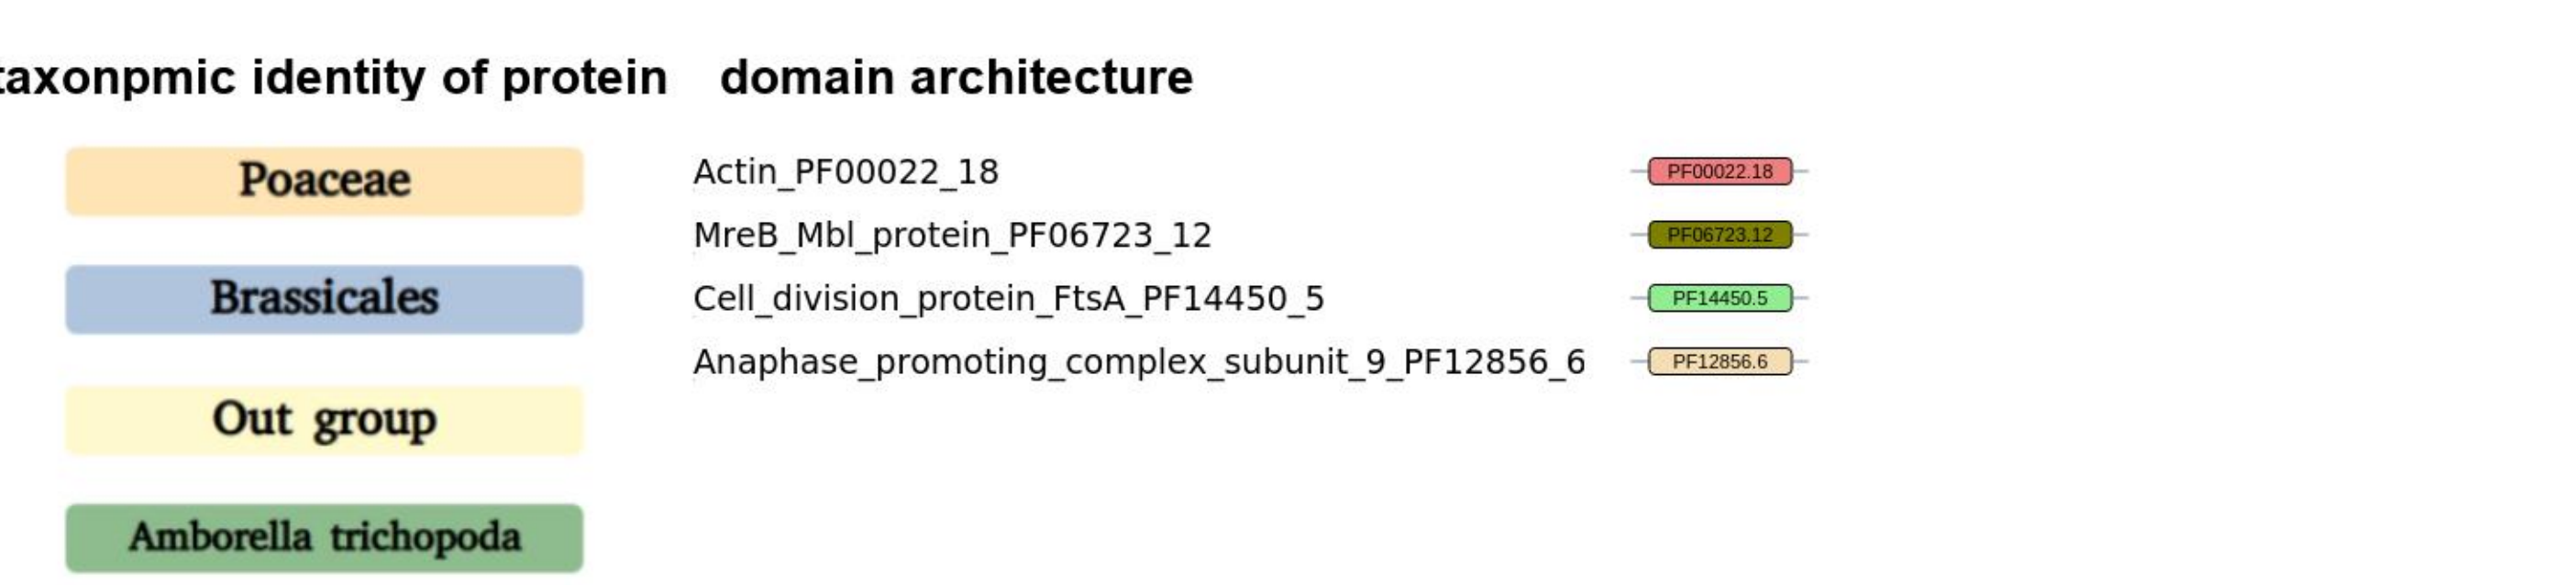



**Figure S11.** PhyML phylogenetic relations and composition of domains for AT1G66350, AT5G17490, AT3G03450, AT2G01570, AT1G14920 homologues of representative plant species. The color legends of species and domains is given below

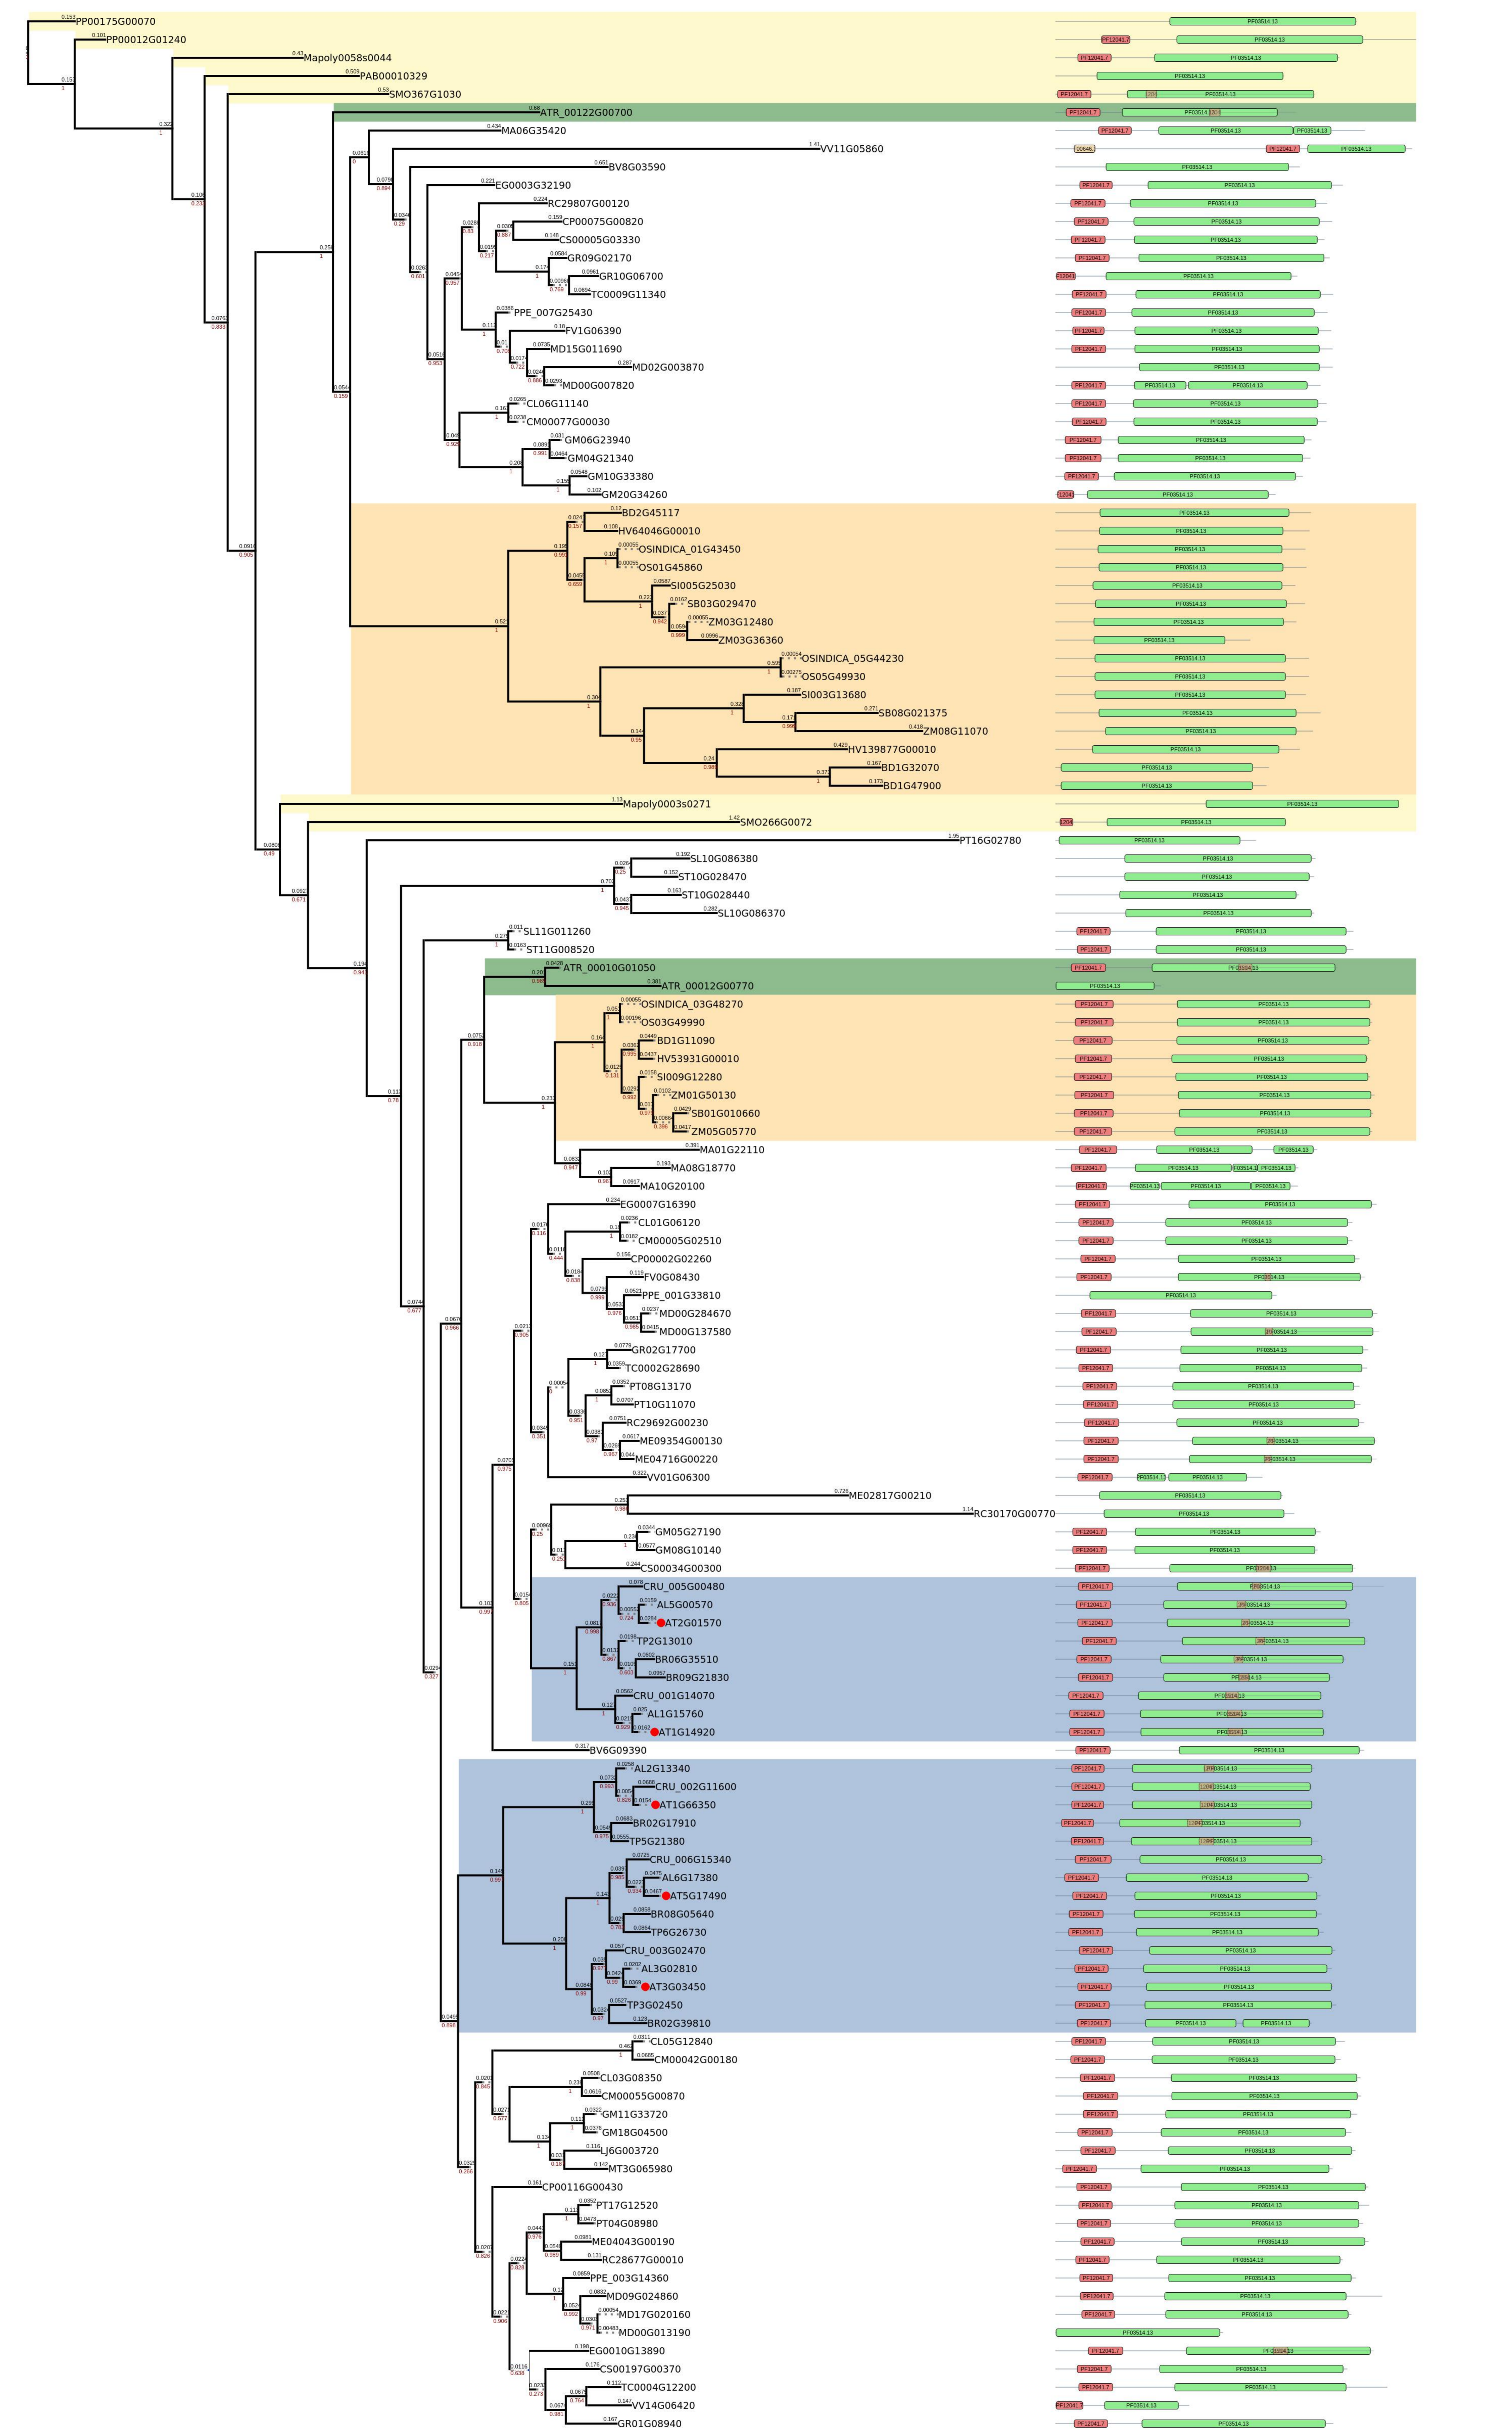

taxonpmic identity of protein domain architecture

**Poaceae** GRAS\_domain\_family\_Pf03514\_13  
Transcriptional\_regulator\_DELLA\_protein\_N\_terminal\_Pf12041\_7

**Brassicales** F\_box\_domain\_Pf00646\_32

**Out group**

**Amborella trichopoda**



**Figure S12.** PhyML phylogenetic relations and composition of domains for AT1G17920, AT1G73360 homologues of representative plant species. The color legends of species and domains is given below

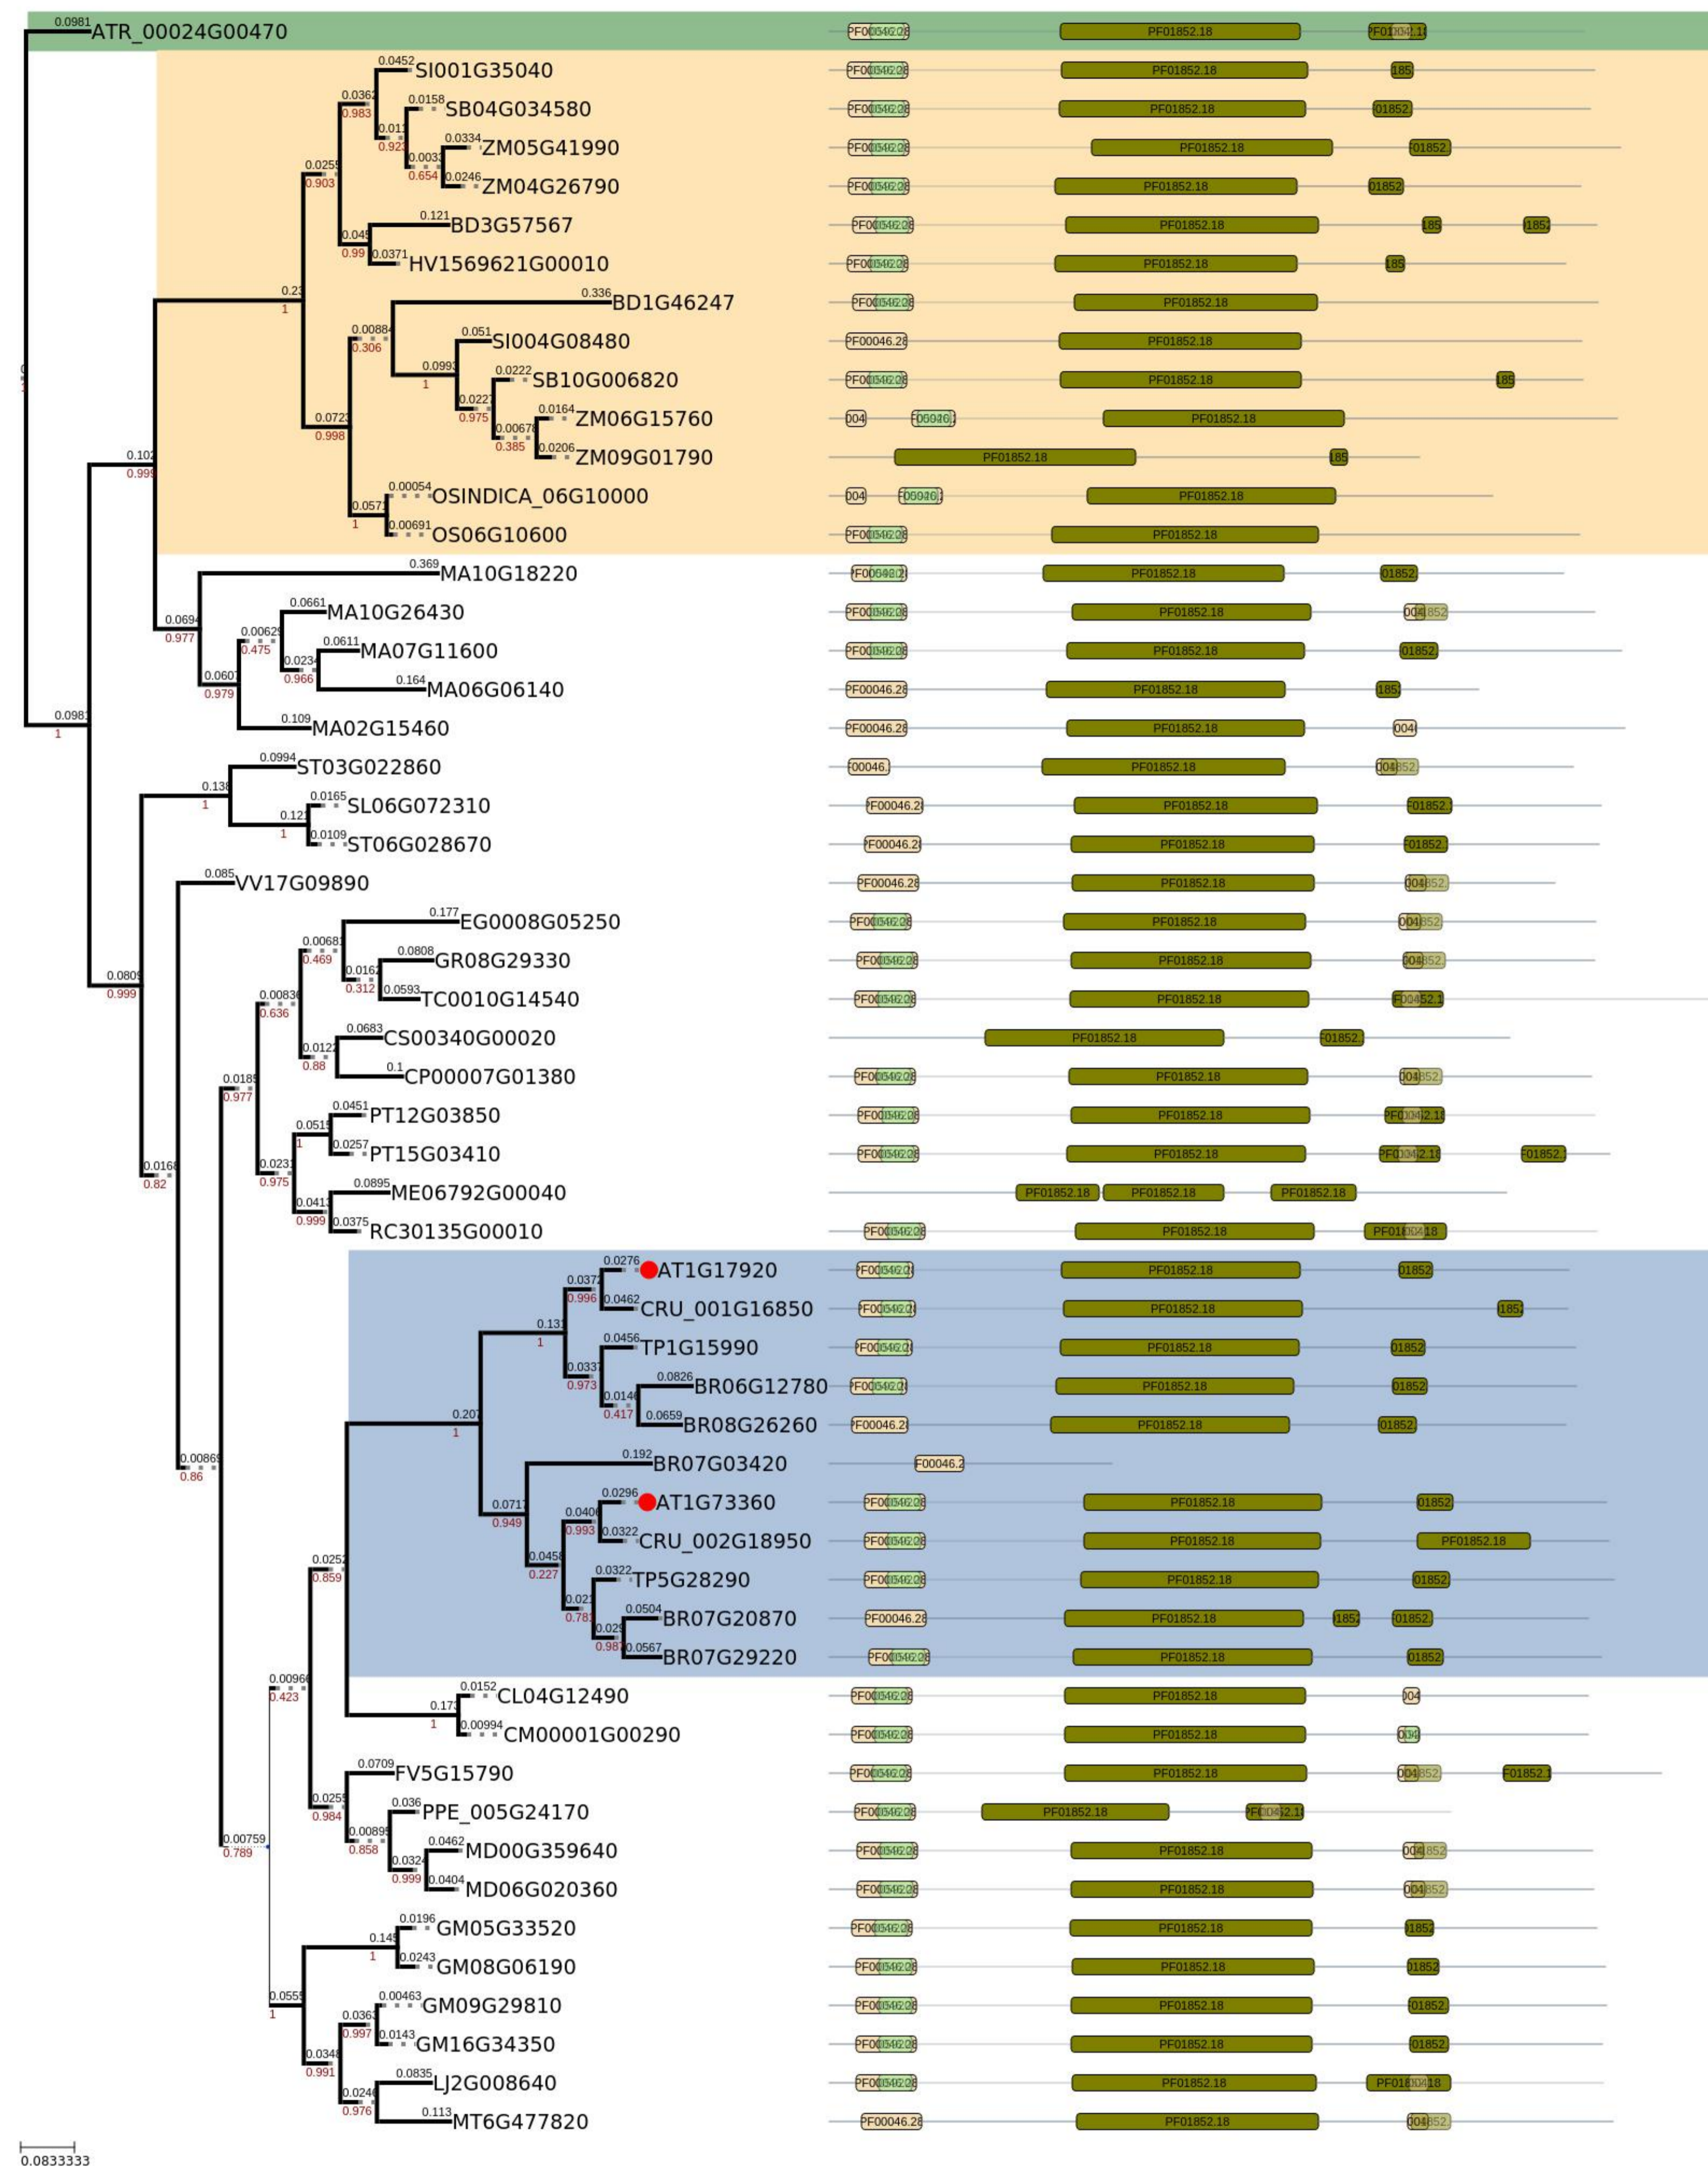

taxonpmic identity of protein domain architecture

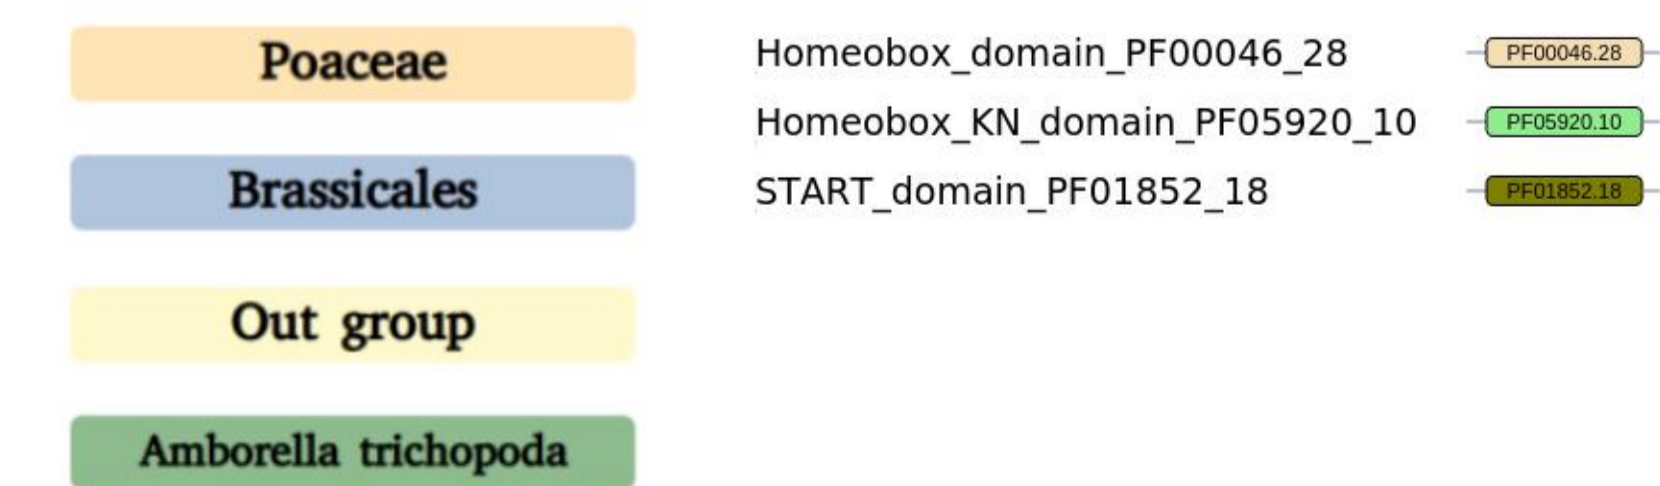



**Figure S13.** PhyML phylogenetic relations and composition of domains for AT1G19835 homologues of representative plant species. The color legends of species and domains is given below

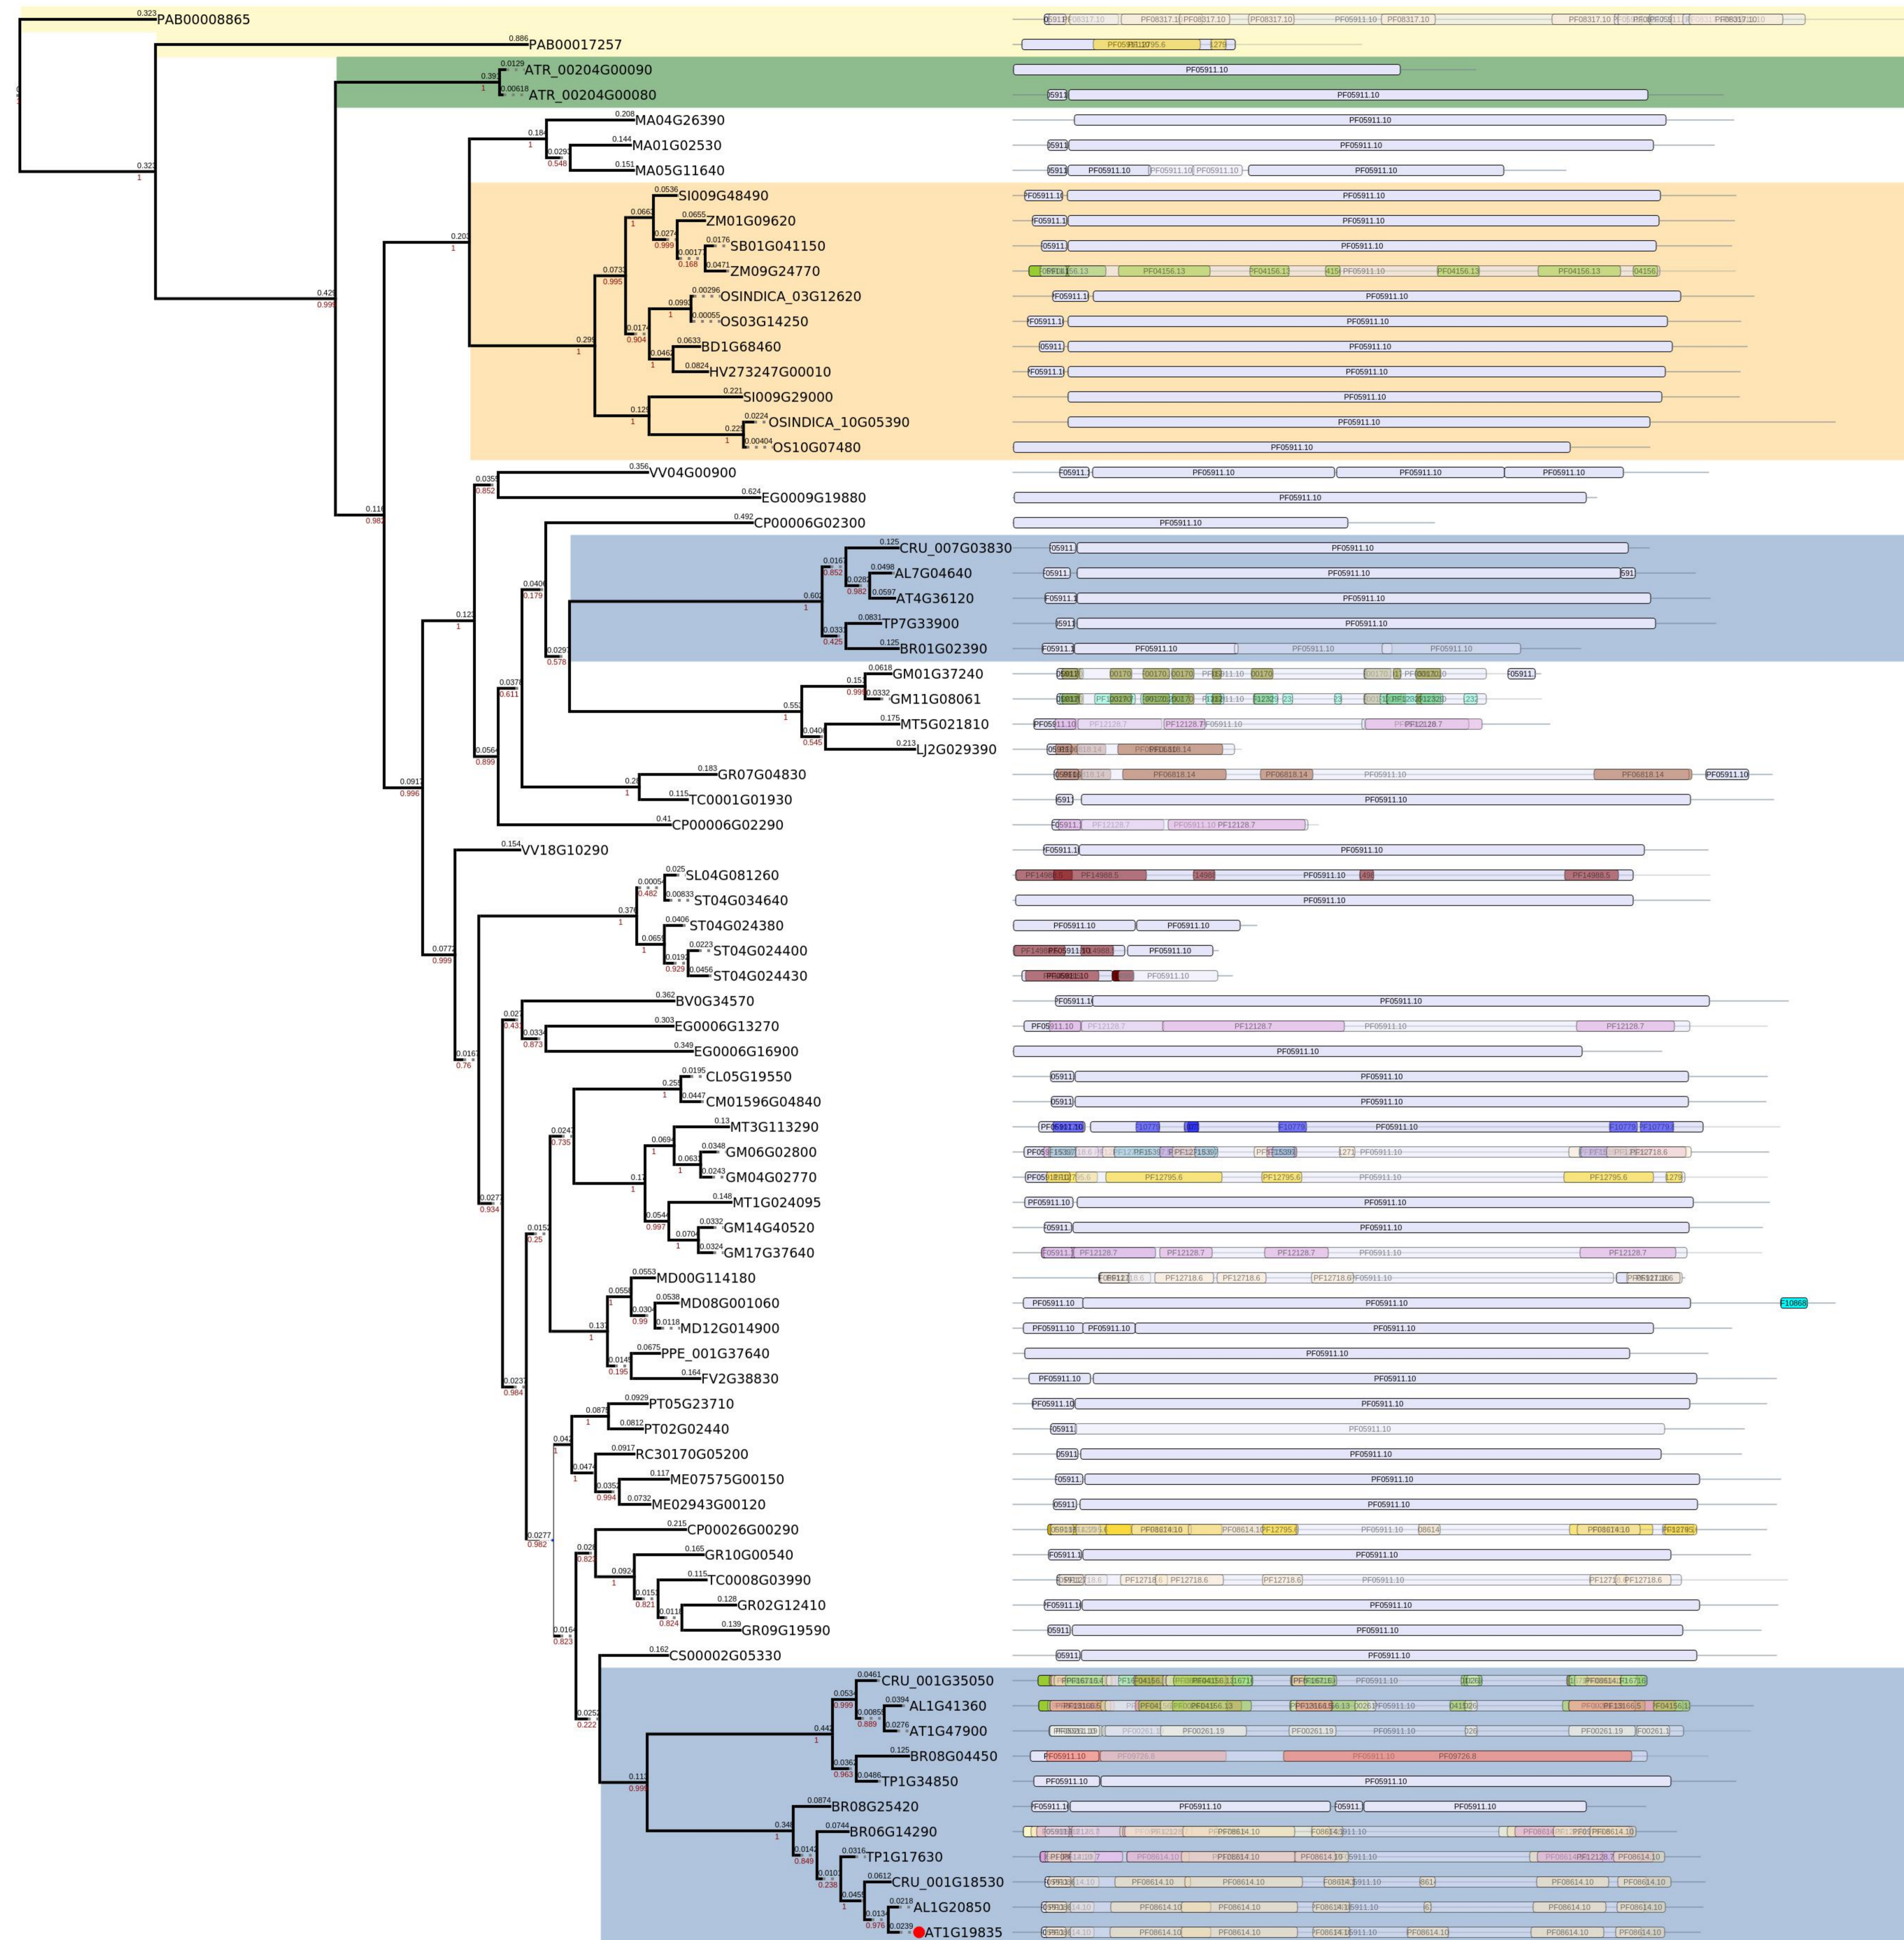

**taxonomic identity of protein**

- Poaceae**
  - Filament\_like\_plant\_protein\_long\_coiled\_coil\_PF05911\_10
  - Spc7\_kinetochore\_protein\_PF08317\_10
- Brassicales**
  - Mechanosensitive\_ion\_channel\_porin\_domain\_PF12795\_6
  - InCa\_protein\_PF04156\_13
- Out group**
  - bZIP\_transcription\_factor\_PF00170\_20
  - TATA\_element\_modulatory\_factor\_1\_DNA\_binding\_PF12329\_7
  - Protein\_of\_unknown\_function\_DUF3584\_PF12128\_7
  - Fez1\_PF06818\_14
- Amborella trichopoda**
  -

**domain architecture**

- Domain\_of\_unknown\_function\_DUF4515\_PF14988\_5
- Haemolysin\_XhIA\_PF10779\_8
- Domain\_of\_unknown\_function\_DUF4618\_PF15397\_5
- Tropomyosin\_like\_PF12718\_6
- Cysteine\_rich\_antifungal\_protein\_2\_defensin\_like\_PF10868\_7
- Autophagy\_protein\_16\_ATG16\_PF08614\_10
- AAA\_domain\_PF13166\_5
- Bone\_marrow\_stromal\_antigen\_2\_PF16716\_4
- Tropomyosin\_PF00261\_19
- Macoilin\_family\_PF09726\_8
- Uncharacterized\_coiled\_coil\_protein\_DUF2353\_PF09789\_8

0.0833333



**Figure S14.** PhyML phylogenetic relations and composition of domains for AT1G25540 homologues of representative plant species.  
The color legends of species and domains is given below

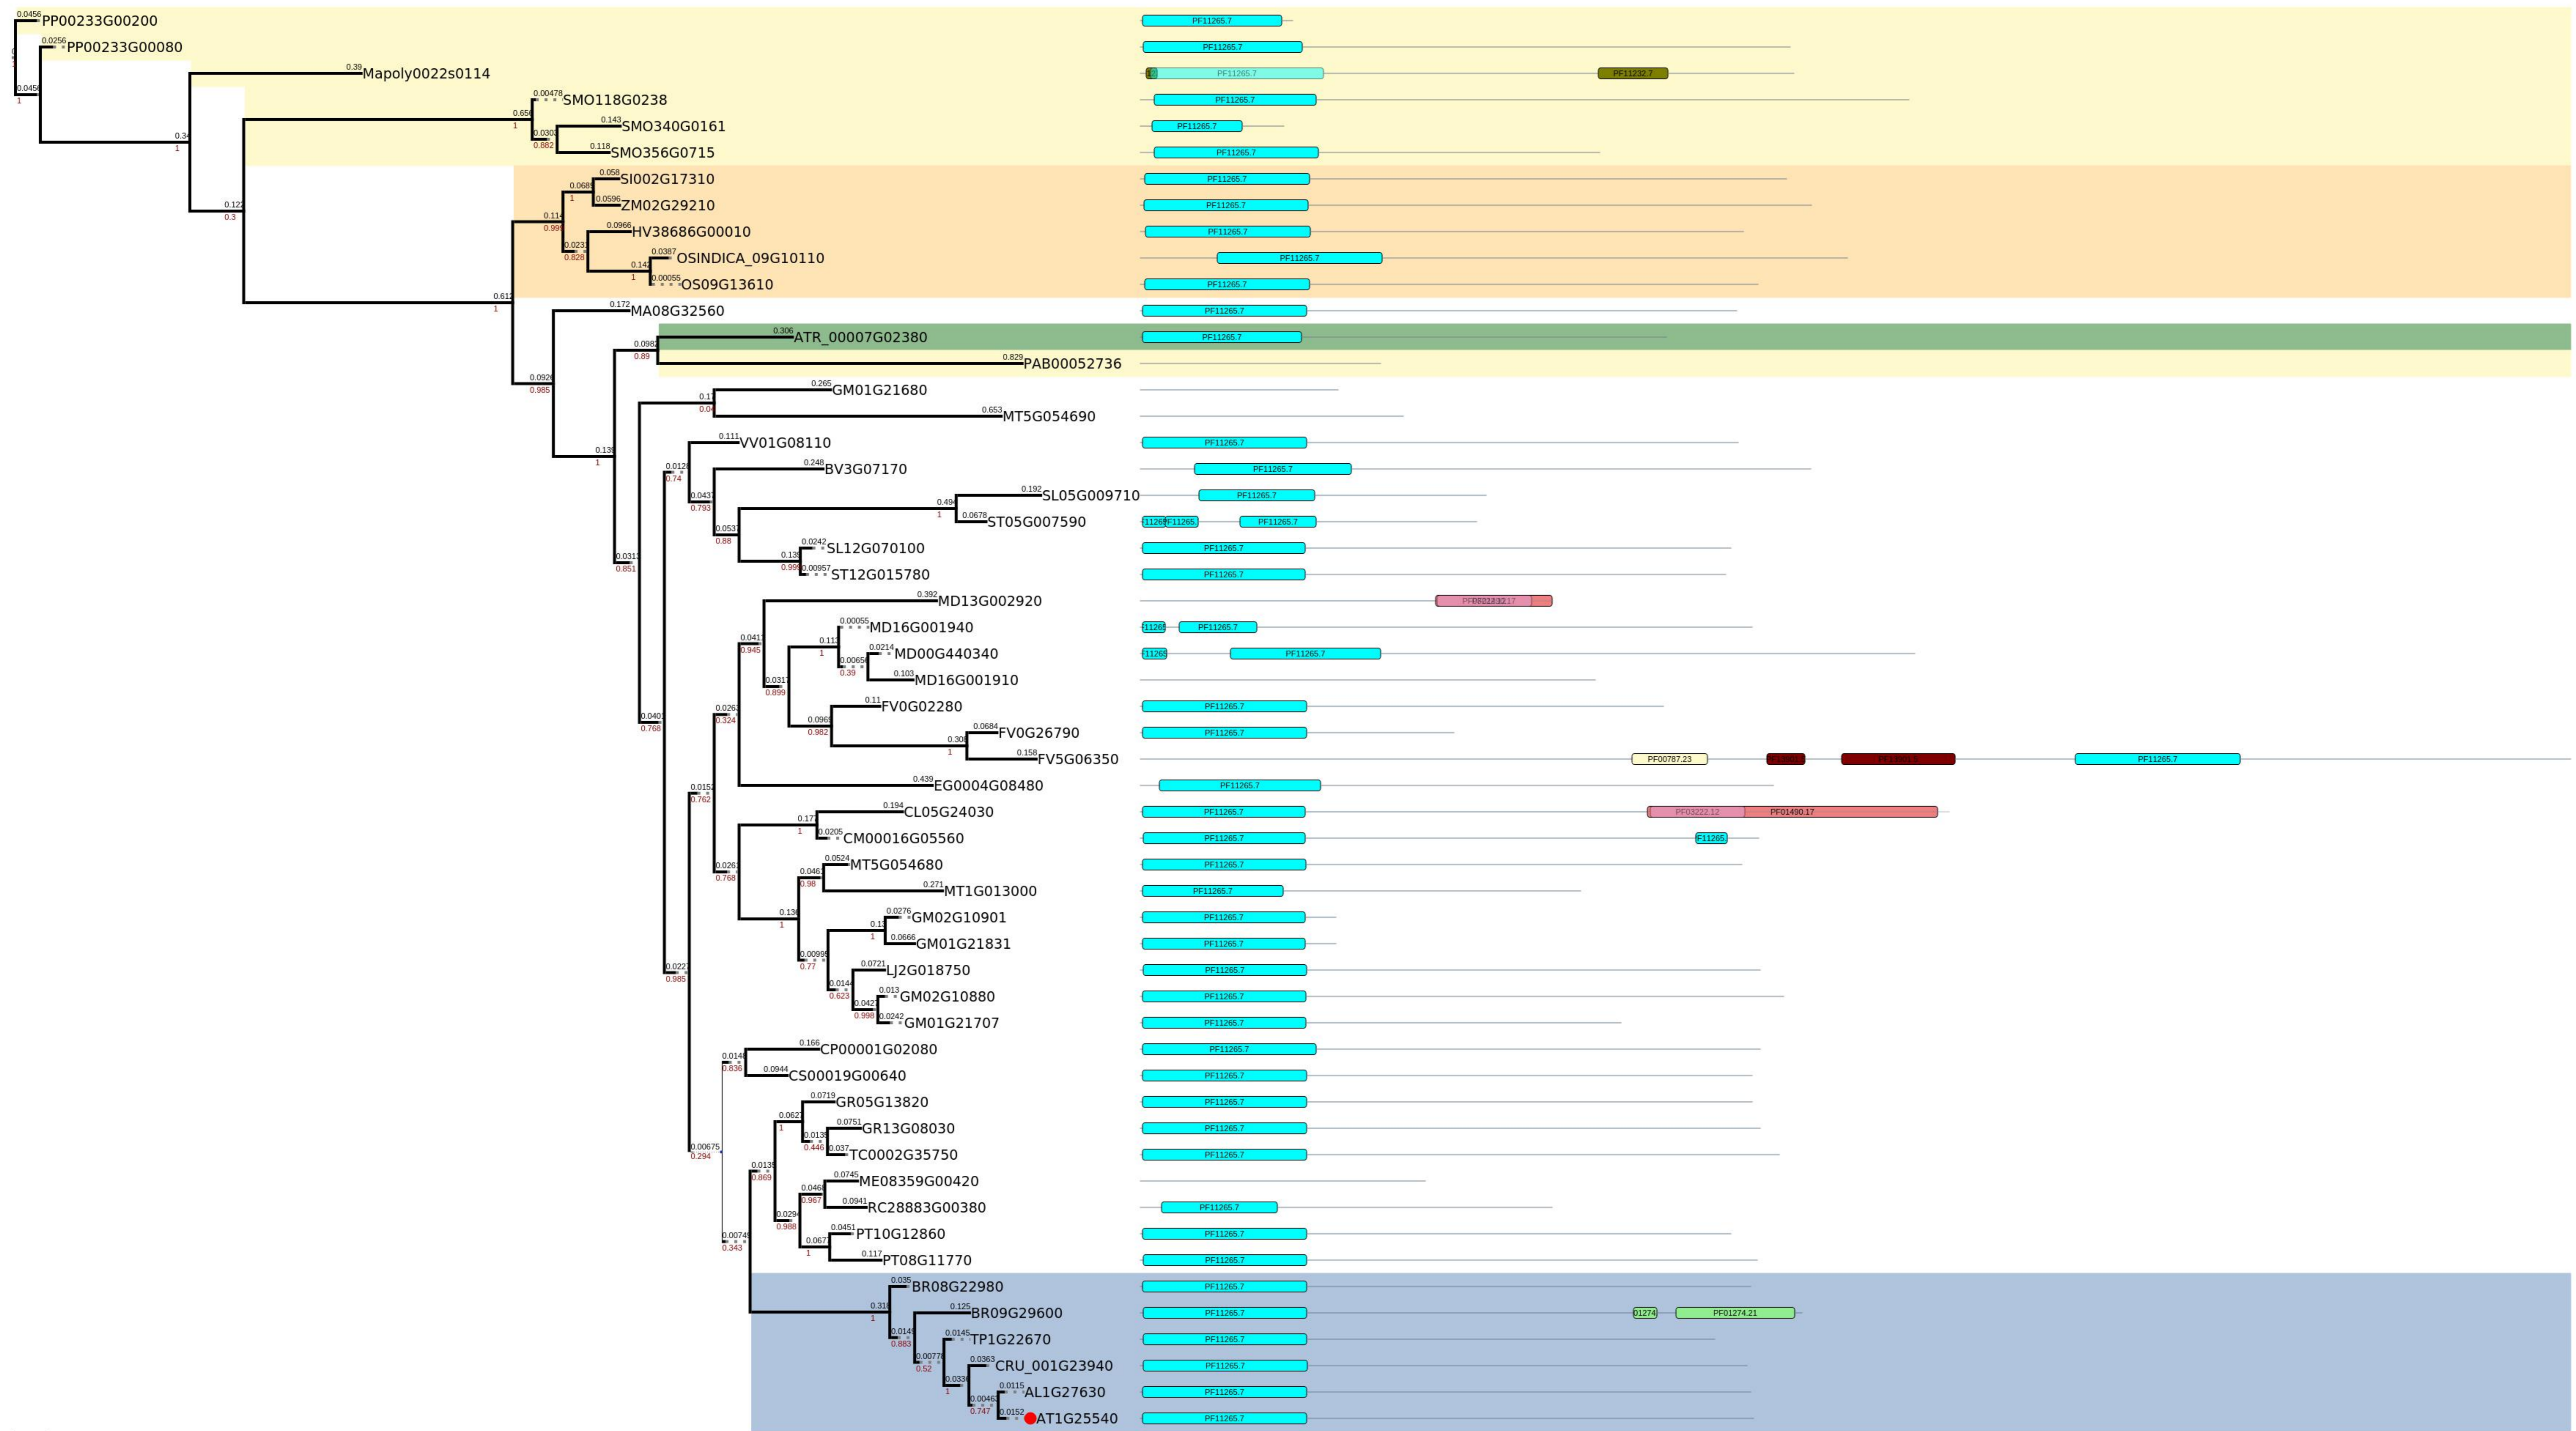

**taxonpmic identity of protein domain architecture**

|                             |                                                                      |            |
|-----------------------------|----------------------------------------------------------------------|------------|
| <b>Poaceae</b>              | Mediator_complex_subunit_25_von_Willebrand_factor_type_A_PF11265_7   | PF11265.7  |
|                             | Mediator_complex_subunit_25_PTOV_activation_and_synapsin_2_PF11232_7 | PF11232.7  |
| <b>Brassicales</b>          | Transmembrane_amino_acid_transporter_protein_PF01490_17              | PF01490.17 |
|                             | Tryptophan_tyrosine_permease_family_PF03222_12                       | PF03222.12 |
| <b>Out group</b>            | PX_domain_PF00787_23                                                 | PF00787.23 |
|                             | Putative_zinc_RING_and_or_ribbon_PF13901_5                           | PF13901.5  |
| <b>Amborella trichopoda</b> | Malate_synthase_PF01274_21                                           | PF01274.21 |
