# Supplementary material for: The evolution of gene regulatory networks controlling Arabidopsis thaliana L. trichome development
Source: PubMed Central journal article supplement (PMC6393967; doi:10.1186/s12870-019-1640-2), 2019-02-15
Supplement: 12870_2019_1640_MOESM8_ESM.pdf [file 12870_2019_1640_MOESM8_ESM.pdf]

**Figure S15.** PhyML relations and composition of domains for AT1G29170, AT2G34150, AT2G38440 homologues of representative plant species. The color legends of species and domains is given below

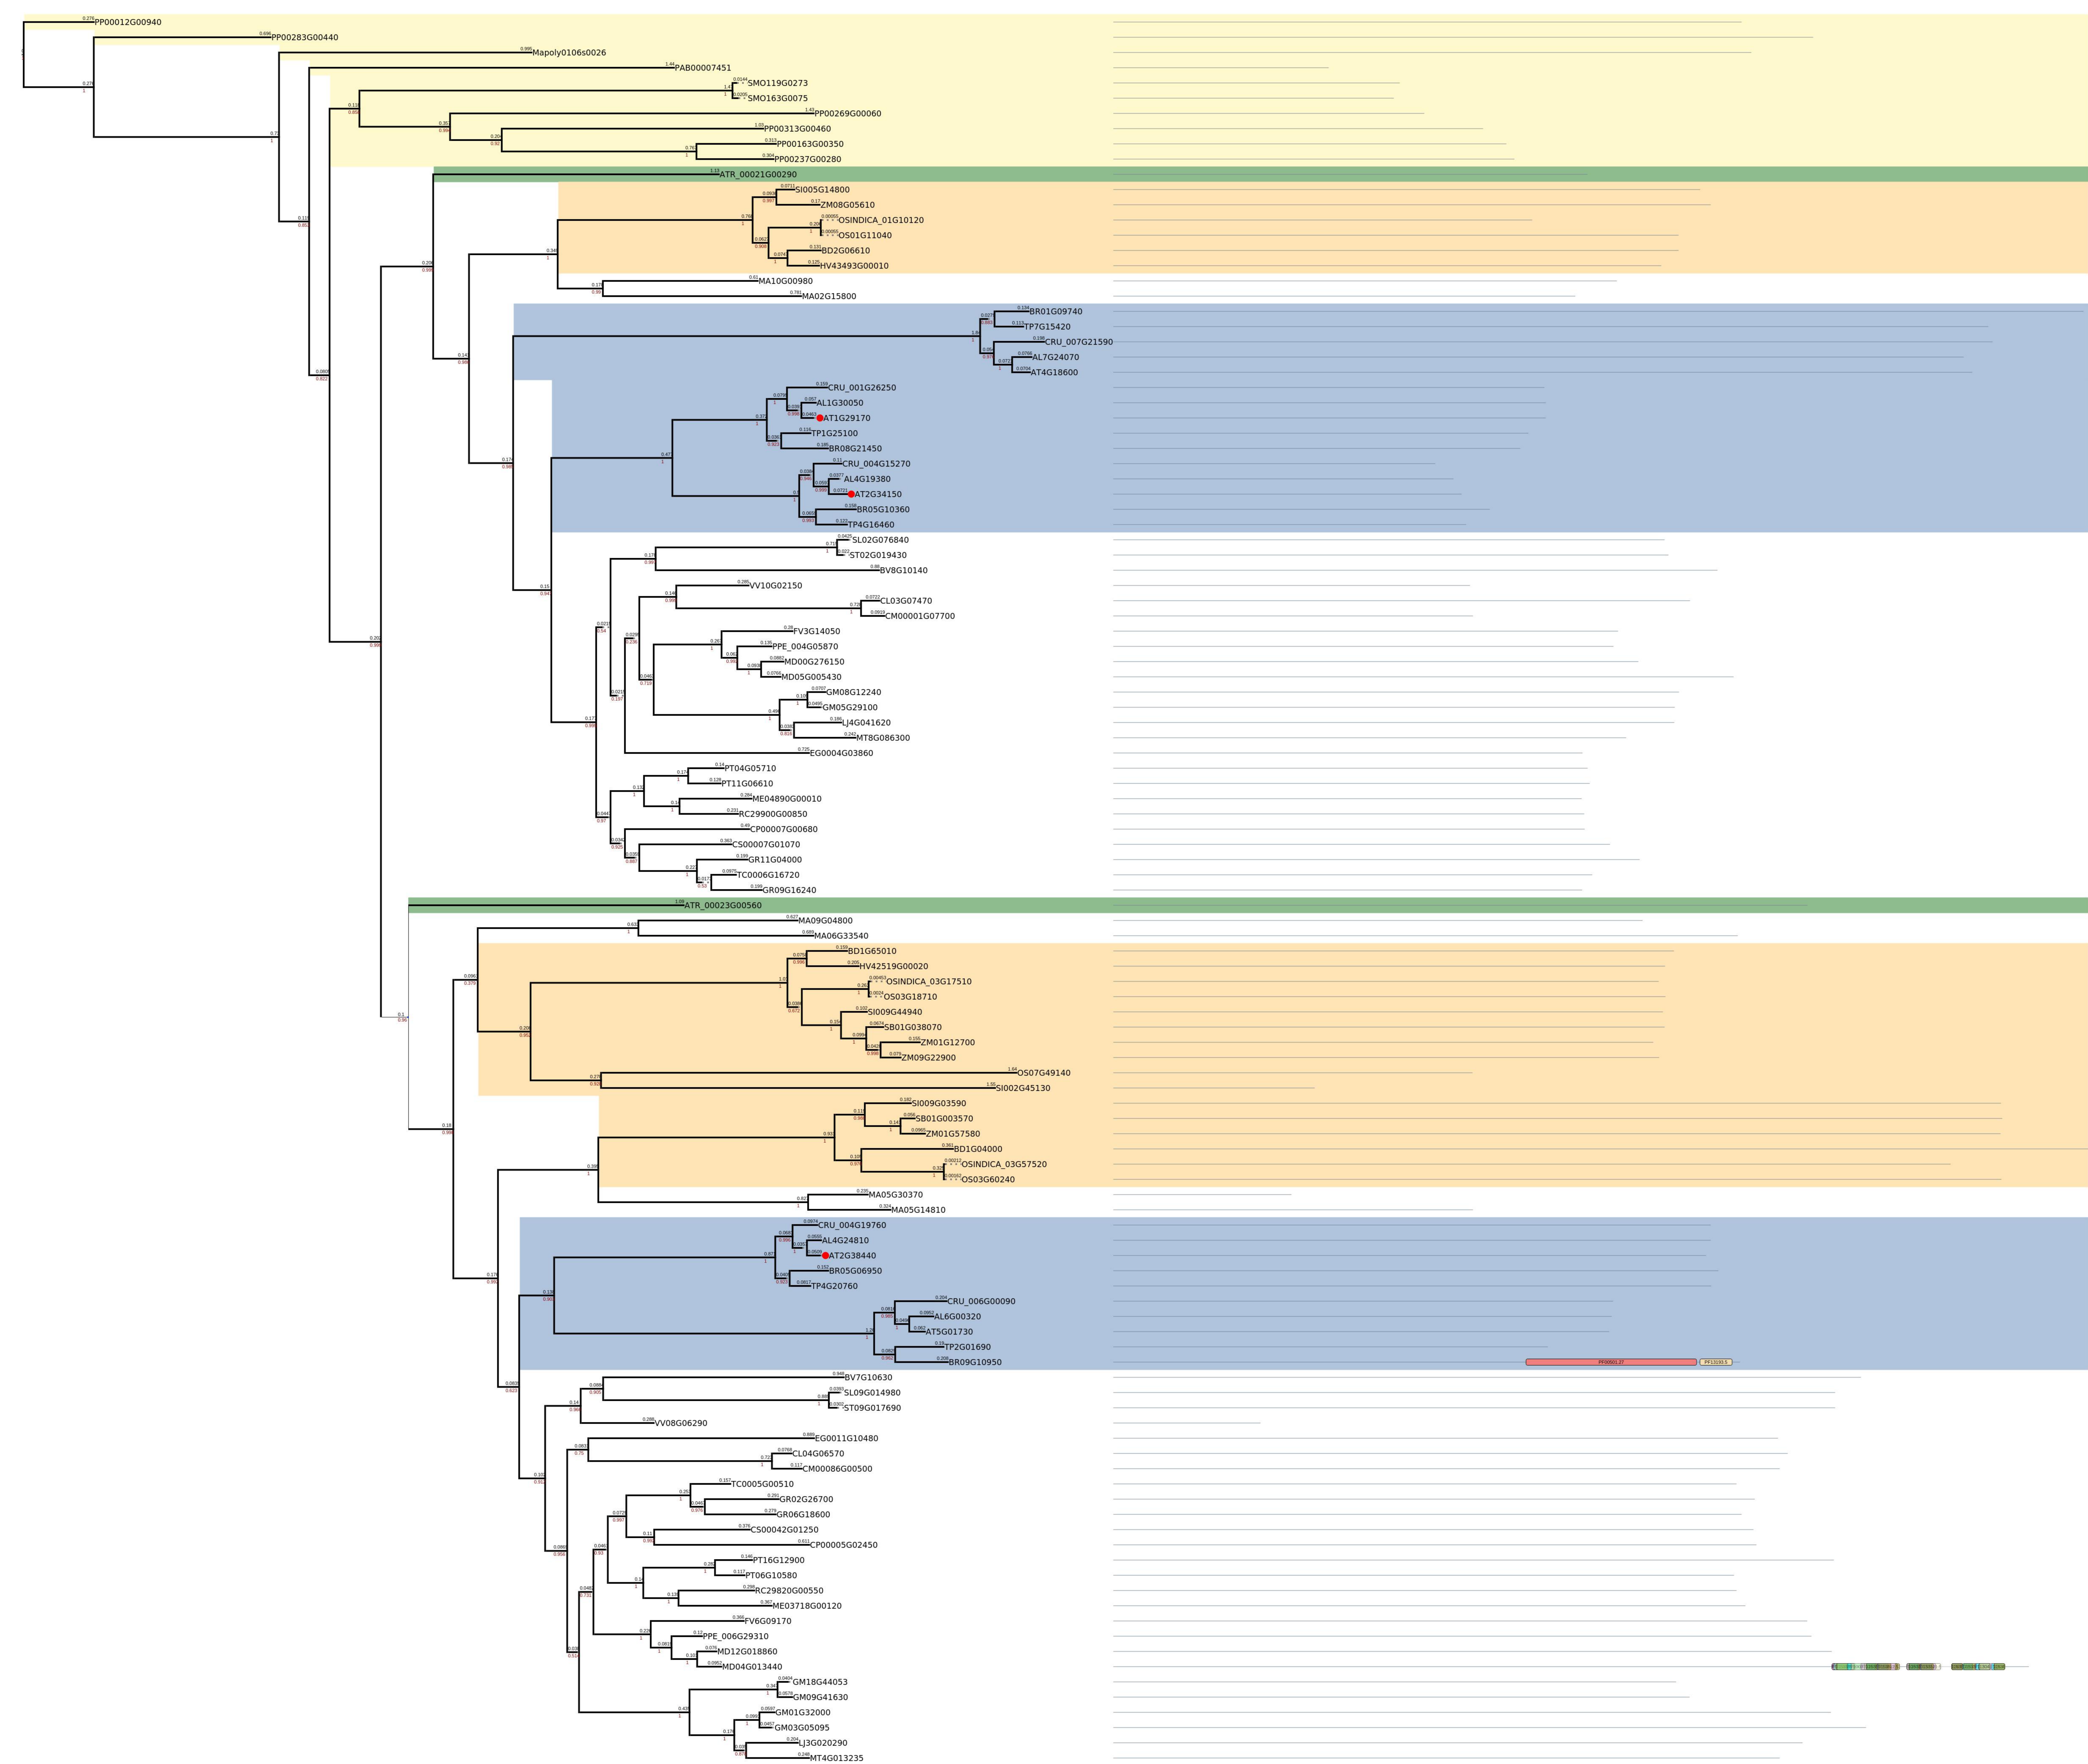

0.0033333

**taxonomic identity of protein**

- Poaceae
- Brassicales
- Out group
- Amborella trichopoda

**domain architecture**

- AMP\_binding\_enzyme\_FF00501\_27
- AMP\_binding\_enzyme\_C\_terminal\_domain\_FF13193\_5
- Mitochondrial\_28S\_ribosomal\_protein\_S27\_FF10037\_8
- PPR\_repeat\_FF01535\_19
- PPR\_repeat\_FF12854\_6
- PPR\_repeat\_family\_FF13041\_5
- Pentatricopeptide\_repeat\_domain\_FF13812\_5

PF00612 PF13193

PF13193 PF13193



**Figure S16.** PhyML phylogenetic relations and composition of domains for AT2G33385, AT1G30825 homologues of representative plant species. The color legends of species and domains is given below

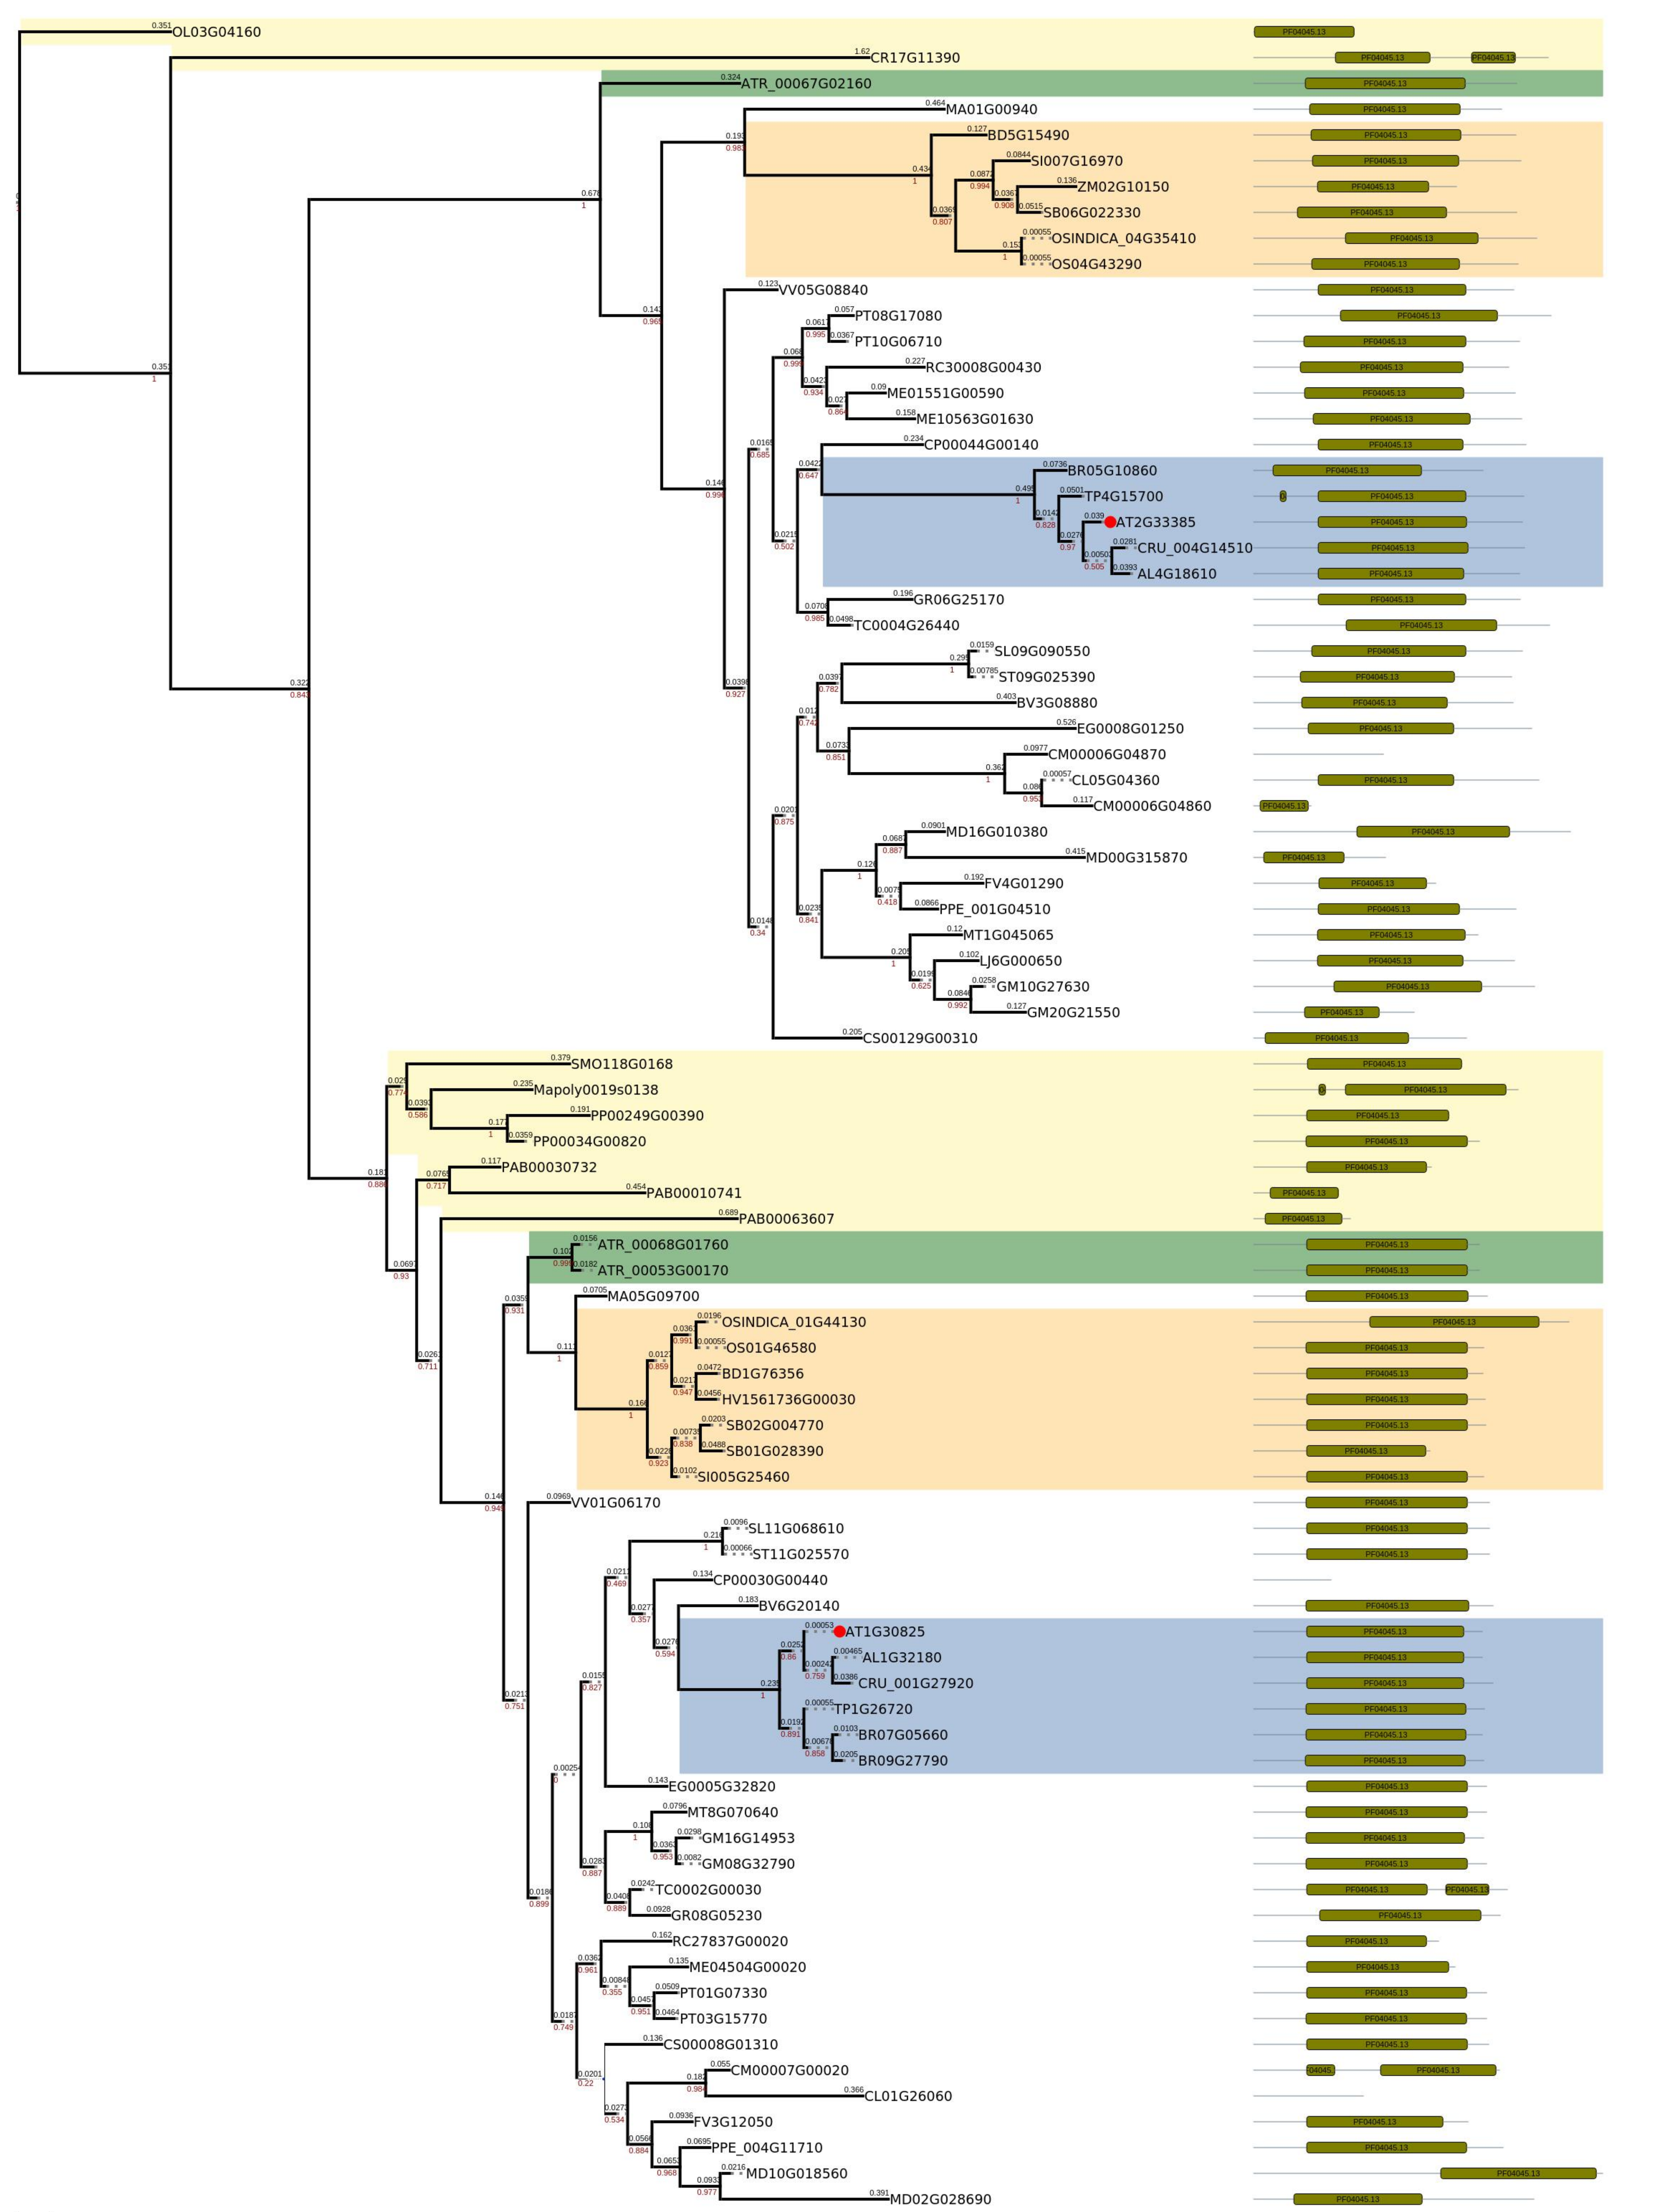

taxonpmic identity of protein domain architecture

- Poaceae Arp2\_3\_complex\_34\_kD\_subunit\_p34\_Arc\_PF04045\_13
- Brassicales
- Out group
- Amborella trichopoda



**Figure S17.** PhyML phylogenetic relations and composition of domains for AT1G33240 homologues of representative plant species. The color legends of species and domains is given below

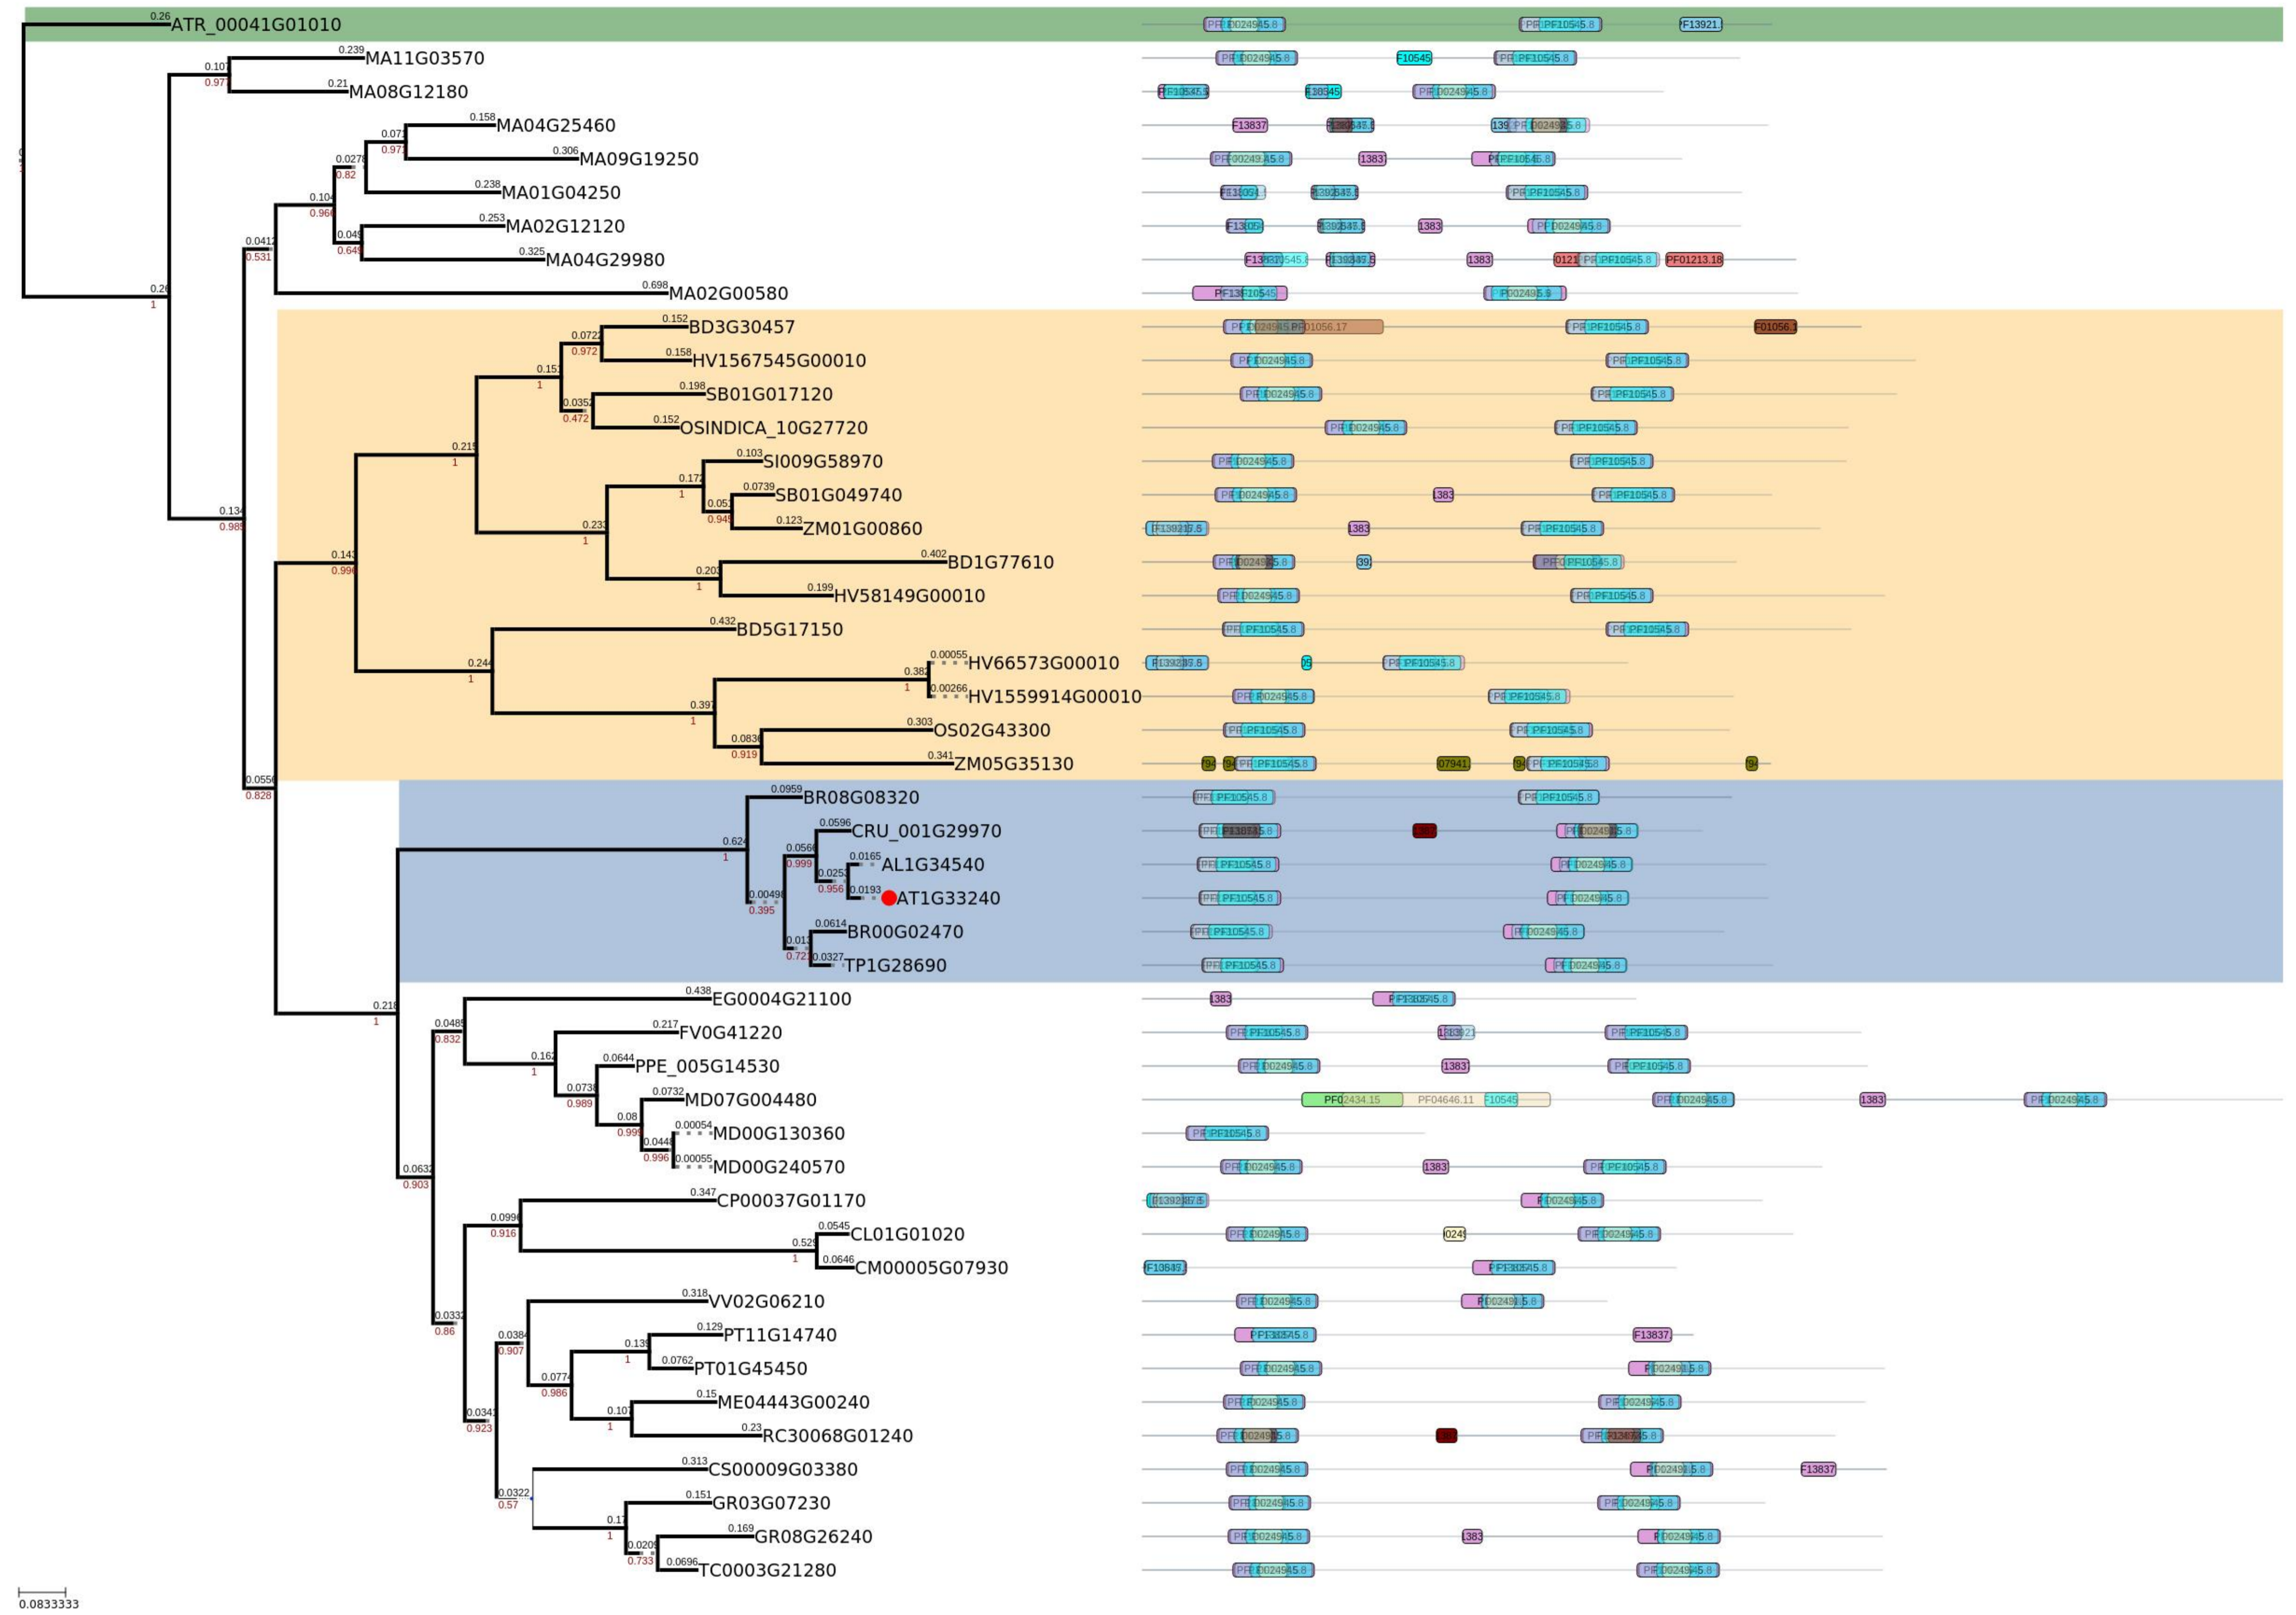

taxonpmic identity of protein

domain architecture

|                             |                                                                    |            |                                               |            |
|-----------------------------|--------------------------------------------------------------------|------------|-----------------------------------------------|------------|
| <b>Poaceae</b>              | Alcohol_dehydrogenase_transcription_factor_Myb_SANT_like_PF10545_8 | PF10545.8  | Protein_of_unknown_function_DUF604_PF04646_11 | PF04646.11 |
|                             | Myb_like_DNA_binding_domain_PF00249_30                             | PF00249.30 | Fringe_like_PF02434_15                        | PF02434.15 |
| <b>Brassicales</b>          | Myb_SANT_like_DNA_binding_domain_PF13837_5                         | PF13837.5  |                                               |            |
|                             | Myb_like_DNA_binding_domain_PF13921_5                              | PF13921.5  |                                               |            |
| <b>Out group</b>            | Myb_SANT_like_DNA_binding_domain_PF13873_5                         | PF13873.5  |                                               |            |
|                             | Adenylate_cyclase_associated_CAP_N_terminal_PF01213_18             | PF01213.18 |                                               |            |
| <b>Amborella trichopoda</b> | Myc_amino_terminal_region_PF01056_17                               | PF01056.17 |                                               |            |
|                             | Potassium_channel_Kv1_4_tandem_inactivation_domain_PF07941_10      | PF07941.10 |                                               |            |



**Figure S18.** PhyML phylogenetic relations and composition of domains for AT1G60430 homologues of representative plant species. The color legends of species and domains is given below

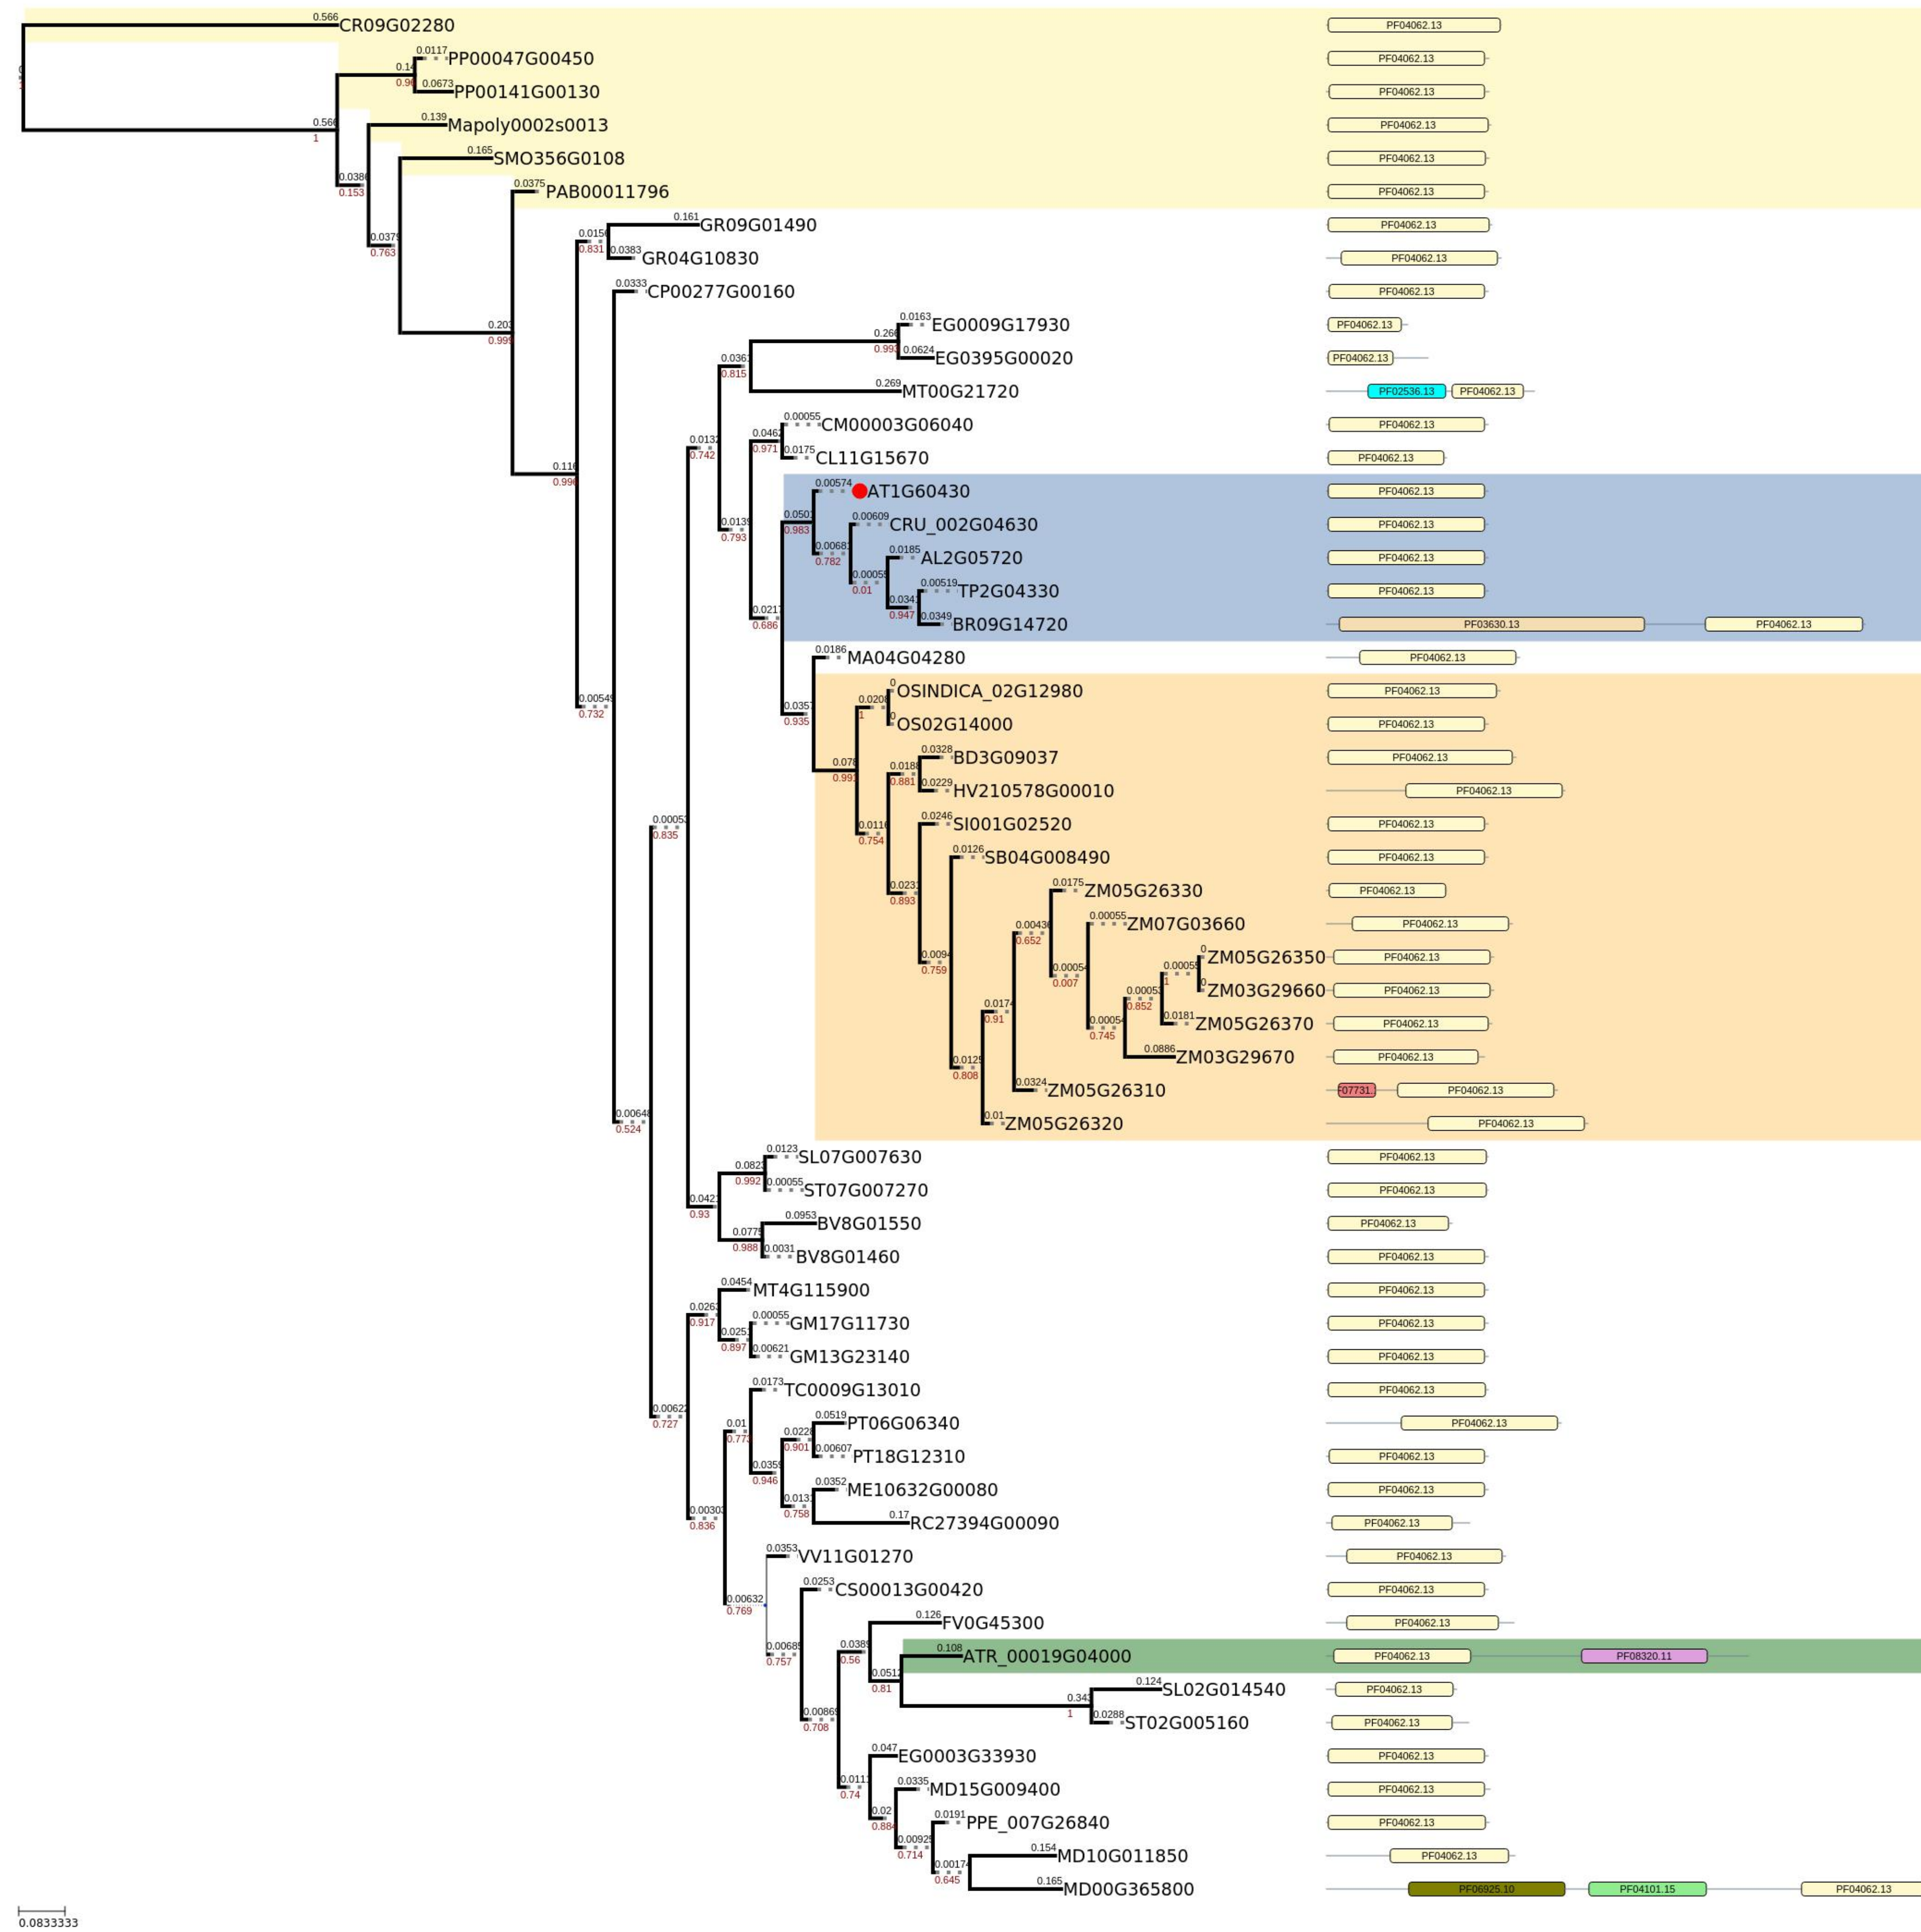

taxonpmic identity of protein domain architecture

|                             |                                                            |            |
|-----------------------------|------------------------------------------------------------|------------|
| <b>Poaceae</b>              | ARP2_3_complex_ARPC3_21_kDa_subunit_PF04062_13             | PF04062.13 |
|                             | mTERF_PF02536_13                                           | PF02536.13 |
| <b>Brassicales</b>          | Fumble_PF03630_13                                          | PF03630.13 |
|                             | Multicopper_oxidase_PF07731_13                             | PF07731.13 |
| <b>Out group</b>            | PIG_X_PBN1_PF08320_11                                      | PF08320.11 |
|                             | Glycosyltransferase_family_28_C_terminal_domain_PF04101_15 | PF04101.15 |
| <b>Amborella trichopoda</b> | Monogalactosyldiacylglycerol_MGDG_synthase_PF06925_10      | PF06925.10 |



**Figure S19.** PhyML phylogenetic relations and composition of domains for AT1G64690 homologues of representative plant species. The color legends of species and domains is given below

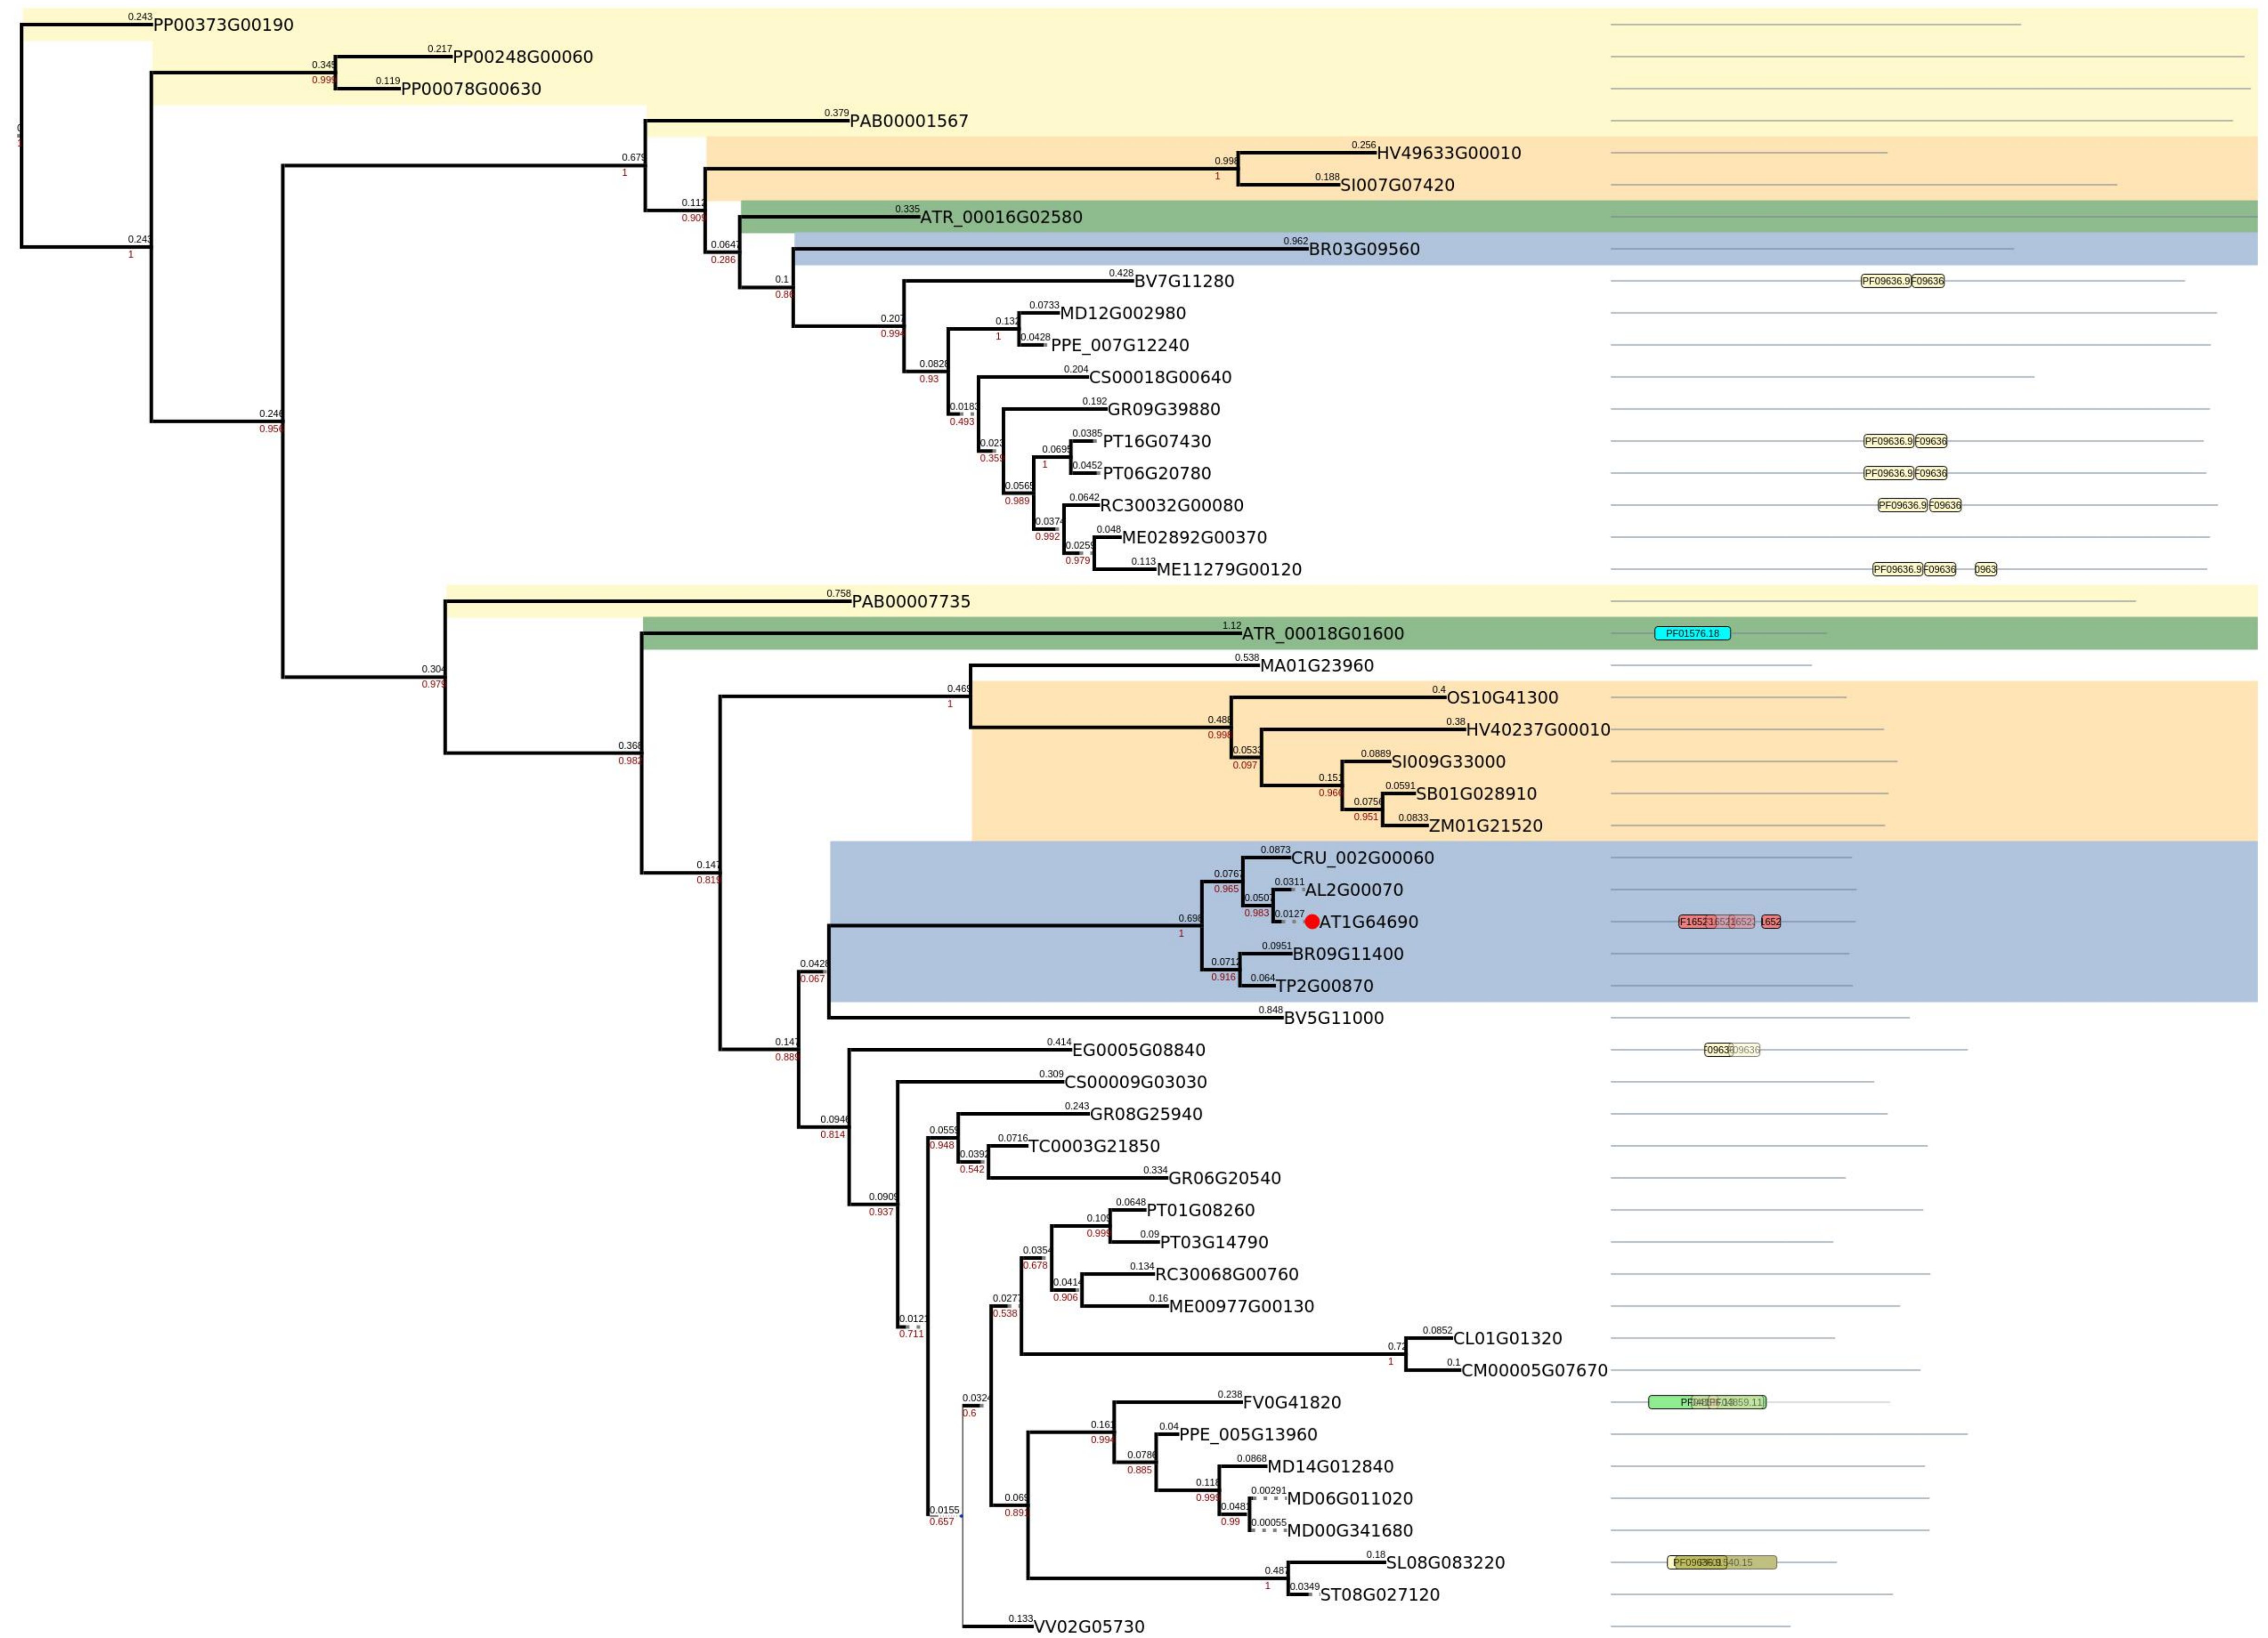

0.0833333

taxonomic identity of protein    domain architecture

Poaceae

XkdW\_protein\_PF09636\_9

PF09636.9

Myosin\_tail\_PF01576\_18

PF01576.18

Brassicales

betaPIX\_coiled\_coil\_PF16523\_4

PF16523.4

Plant\_protein\_of\_unknown\_function\_DUF641\_PF04859\_11

PF04859.11

Out group

IncA\_protein\_PF04156\_13

PF04156.13

Amborella trichopoda

Adhesin\_lipoprotein\_PF01540\_15

PF01540.15



**Figure S20.** PhyML phylogenetic relations and composition of domains of AT1G65470 homologues of representative plant species.  
The color legends of species and domains is given below

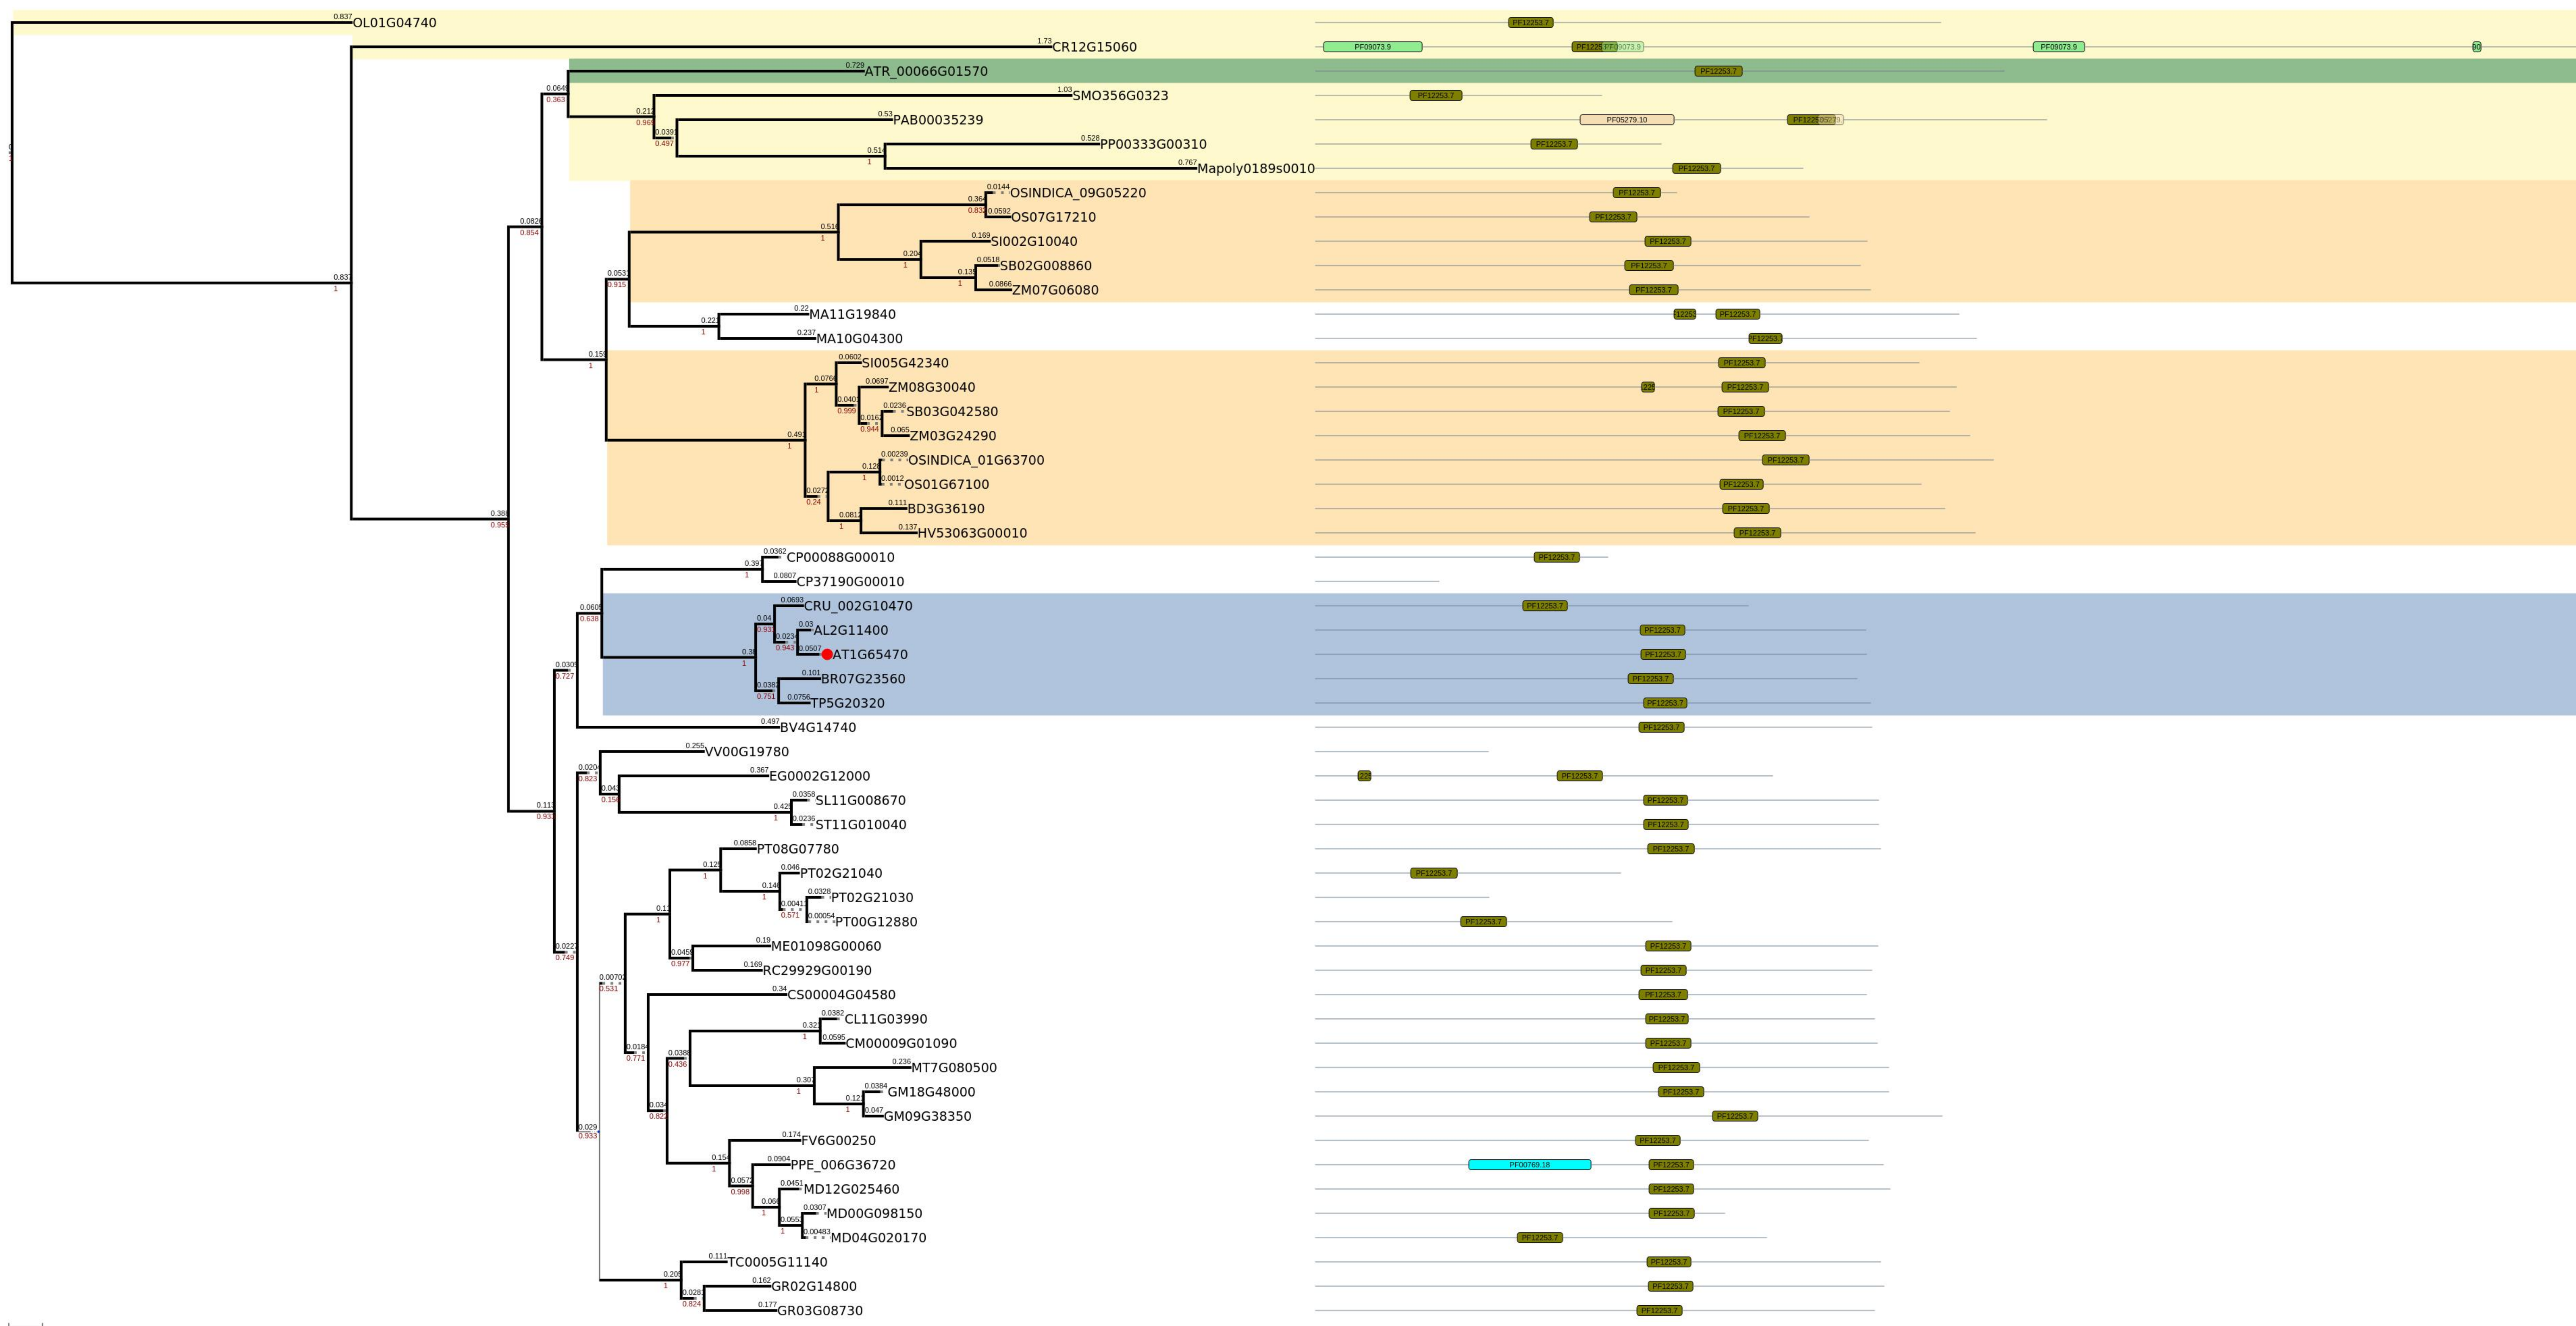

| taxon                | pmic identity of protein                                           | domain architecture    |
|----------------------|--------------------------------------------------------------------|------------------------|
| Poaceae              | Chromatin_assembly_factor_1_subunit_A_PF12253_7<br>BUD22_PFO9073_9 | PF12253_7<br>PF09073_9 |
| Brassicales          | Aspartyl_beta_hydroxylase_N_terminal_region_PF05279_10             | PF05279_10             |
| Out group            | Ezrin_radixin_moesin_family_PF00769_18                             | PF00769_18             |
| Amborella trichopoda |                                                                    |                        |



**Figure S21.** PhyML phylogenetic relations and composition of domains for AT5G38110, AT1G66740 homologues of representative plant species. The color legends of species and domains is given below

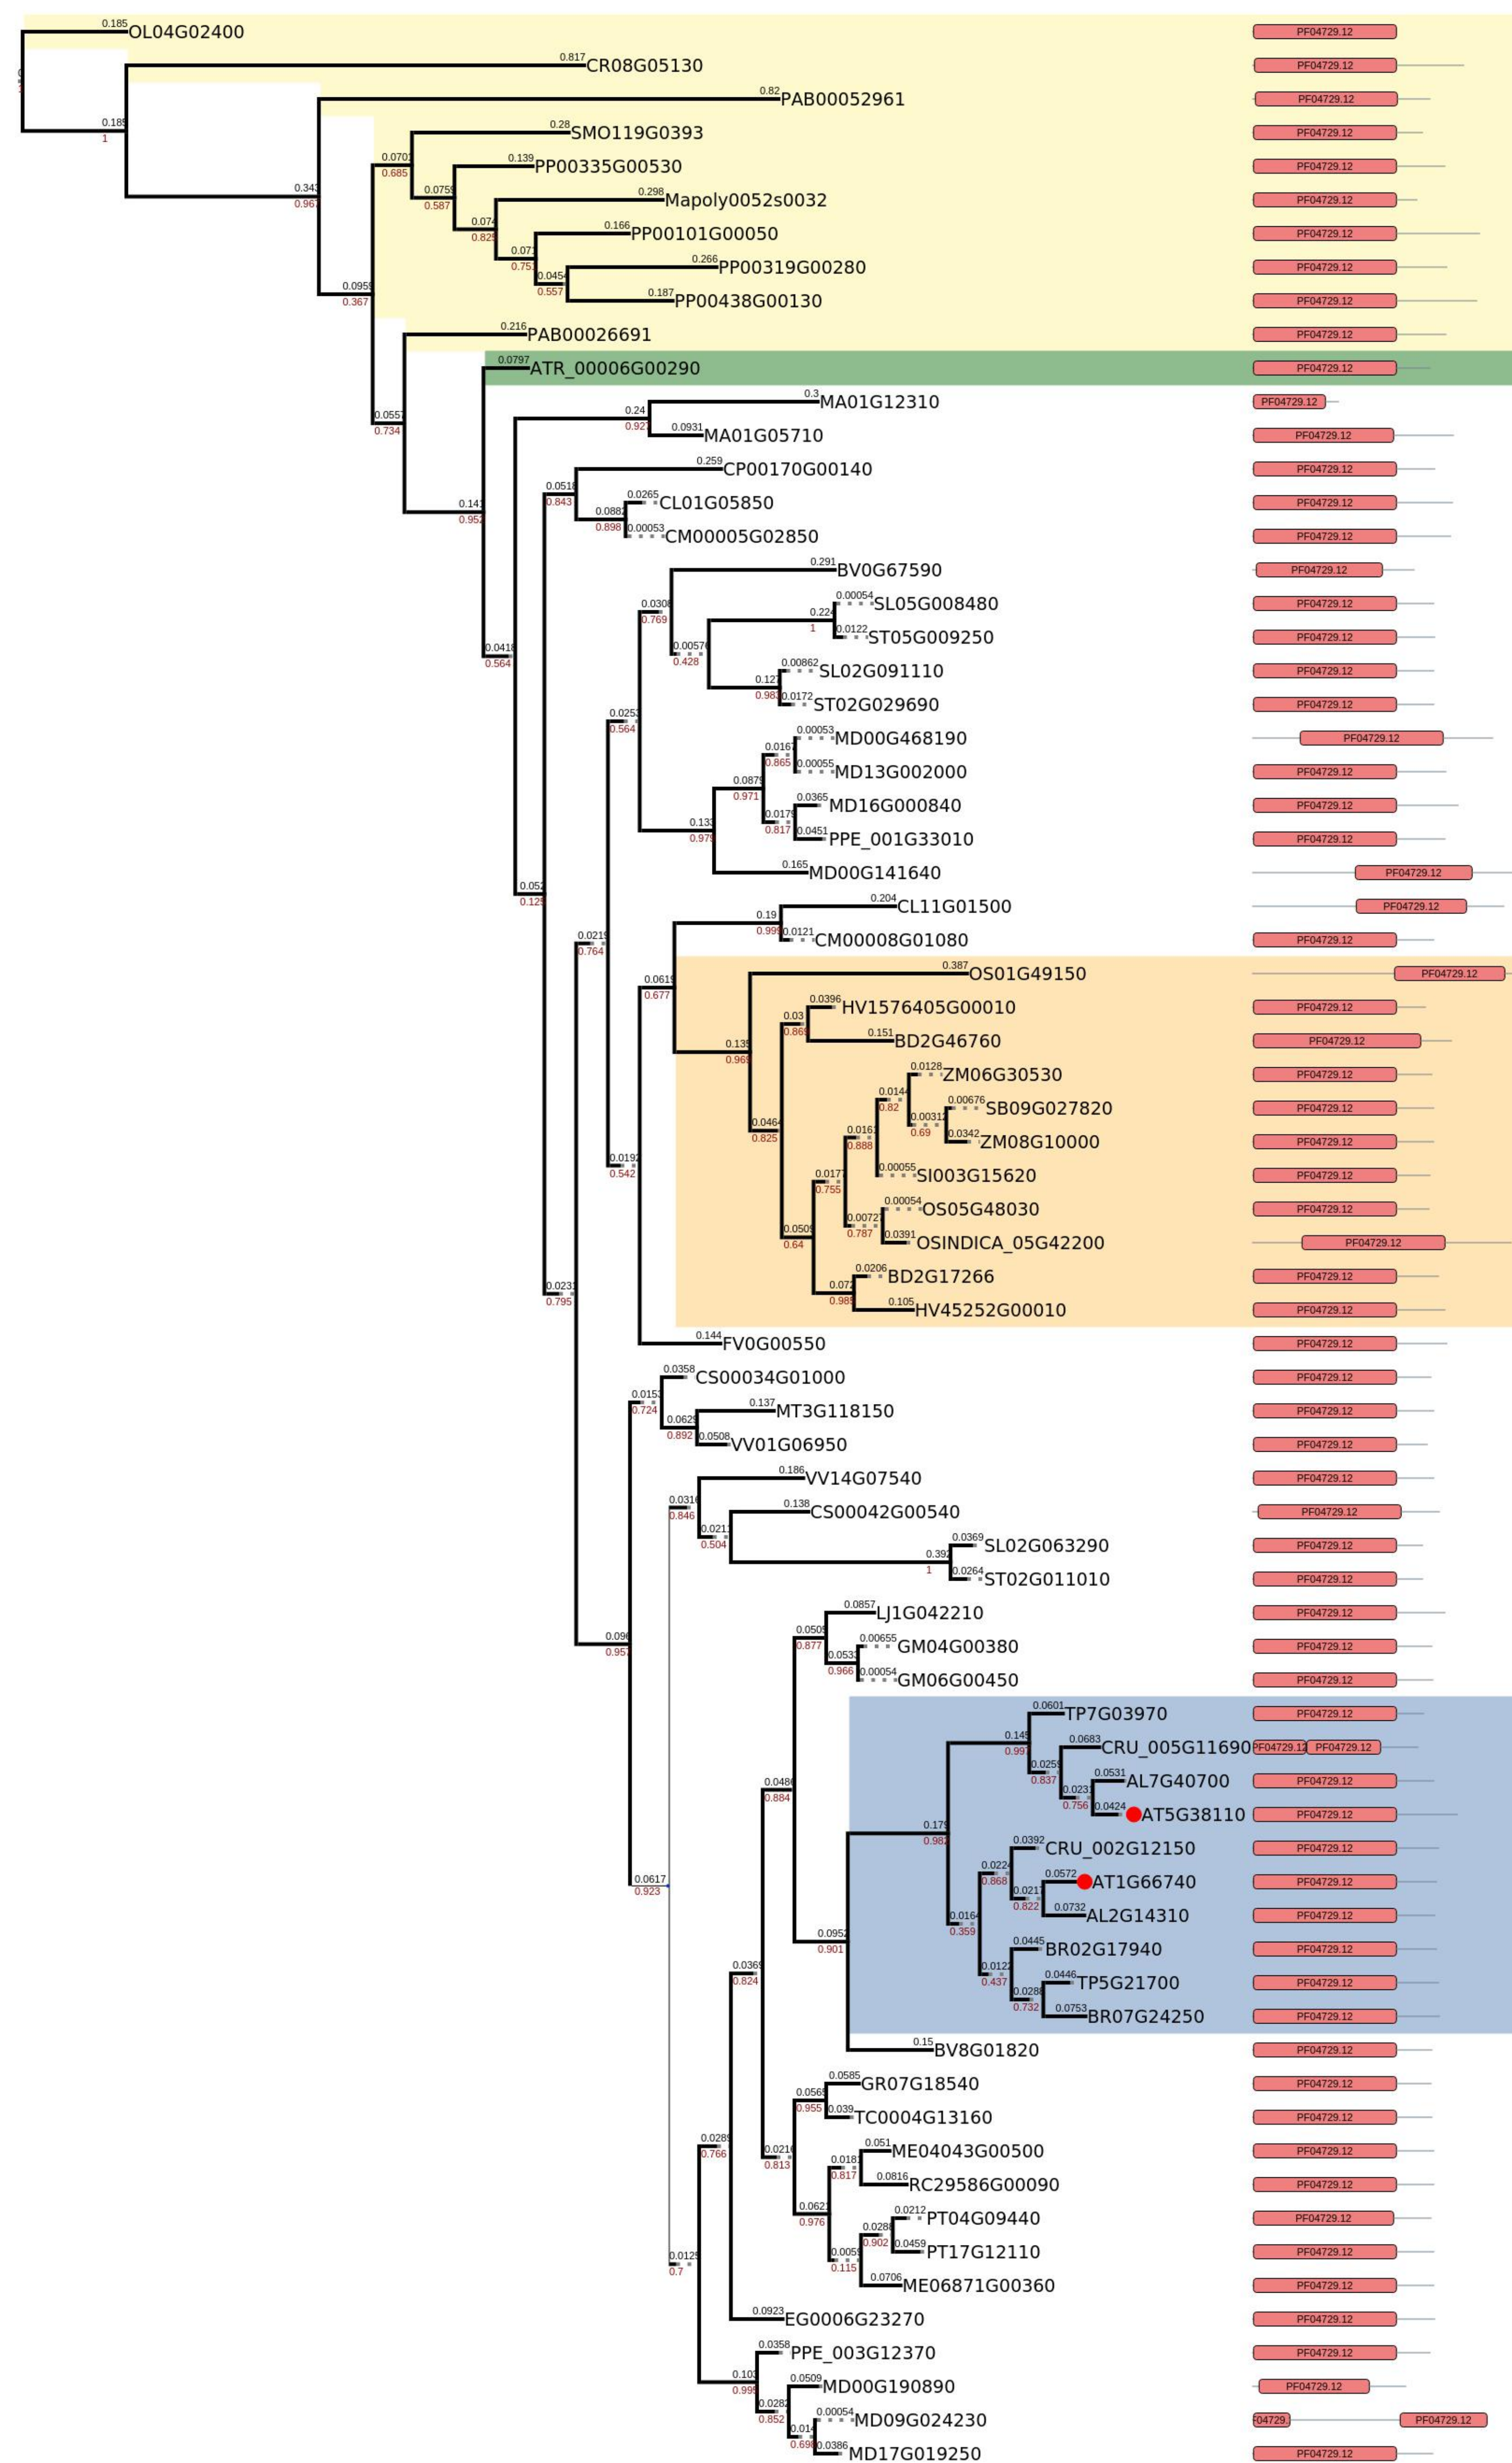

taxonpmic identity of protein domain architecture

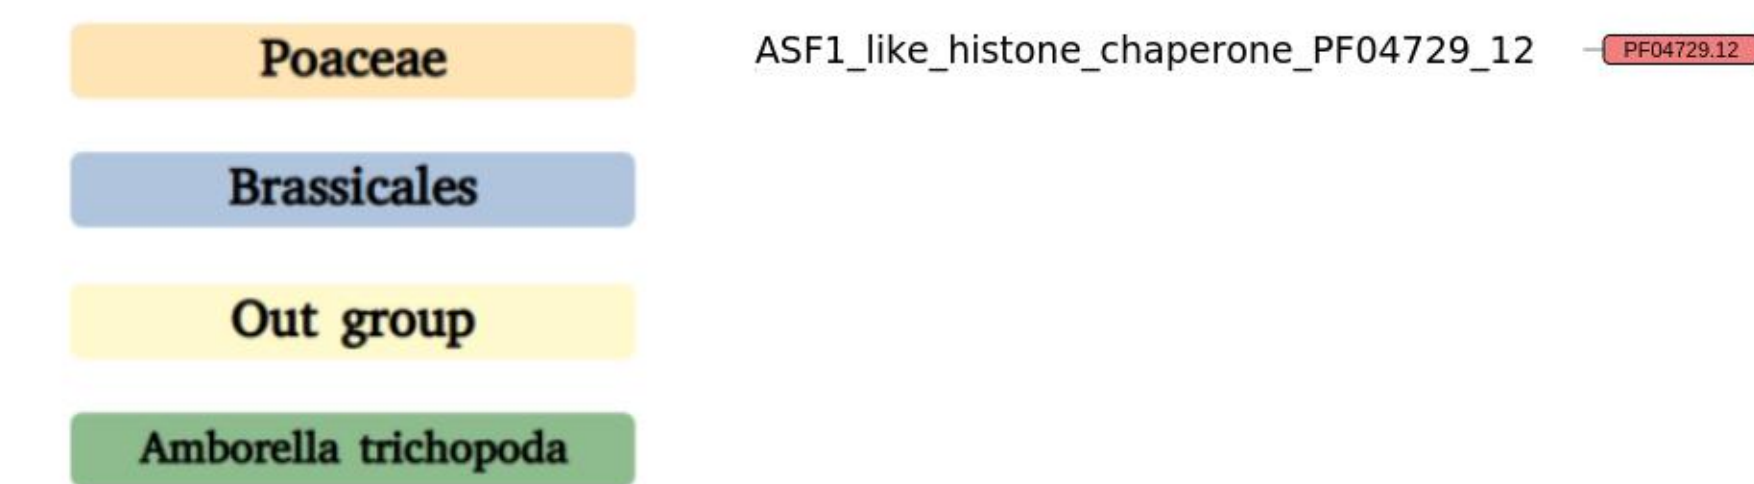



**Figure S22.** PhyML phylogenetic relations and composition of domains for AT1G69490 homologues of representative plant species. The color legends of species and domains is given below

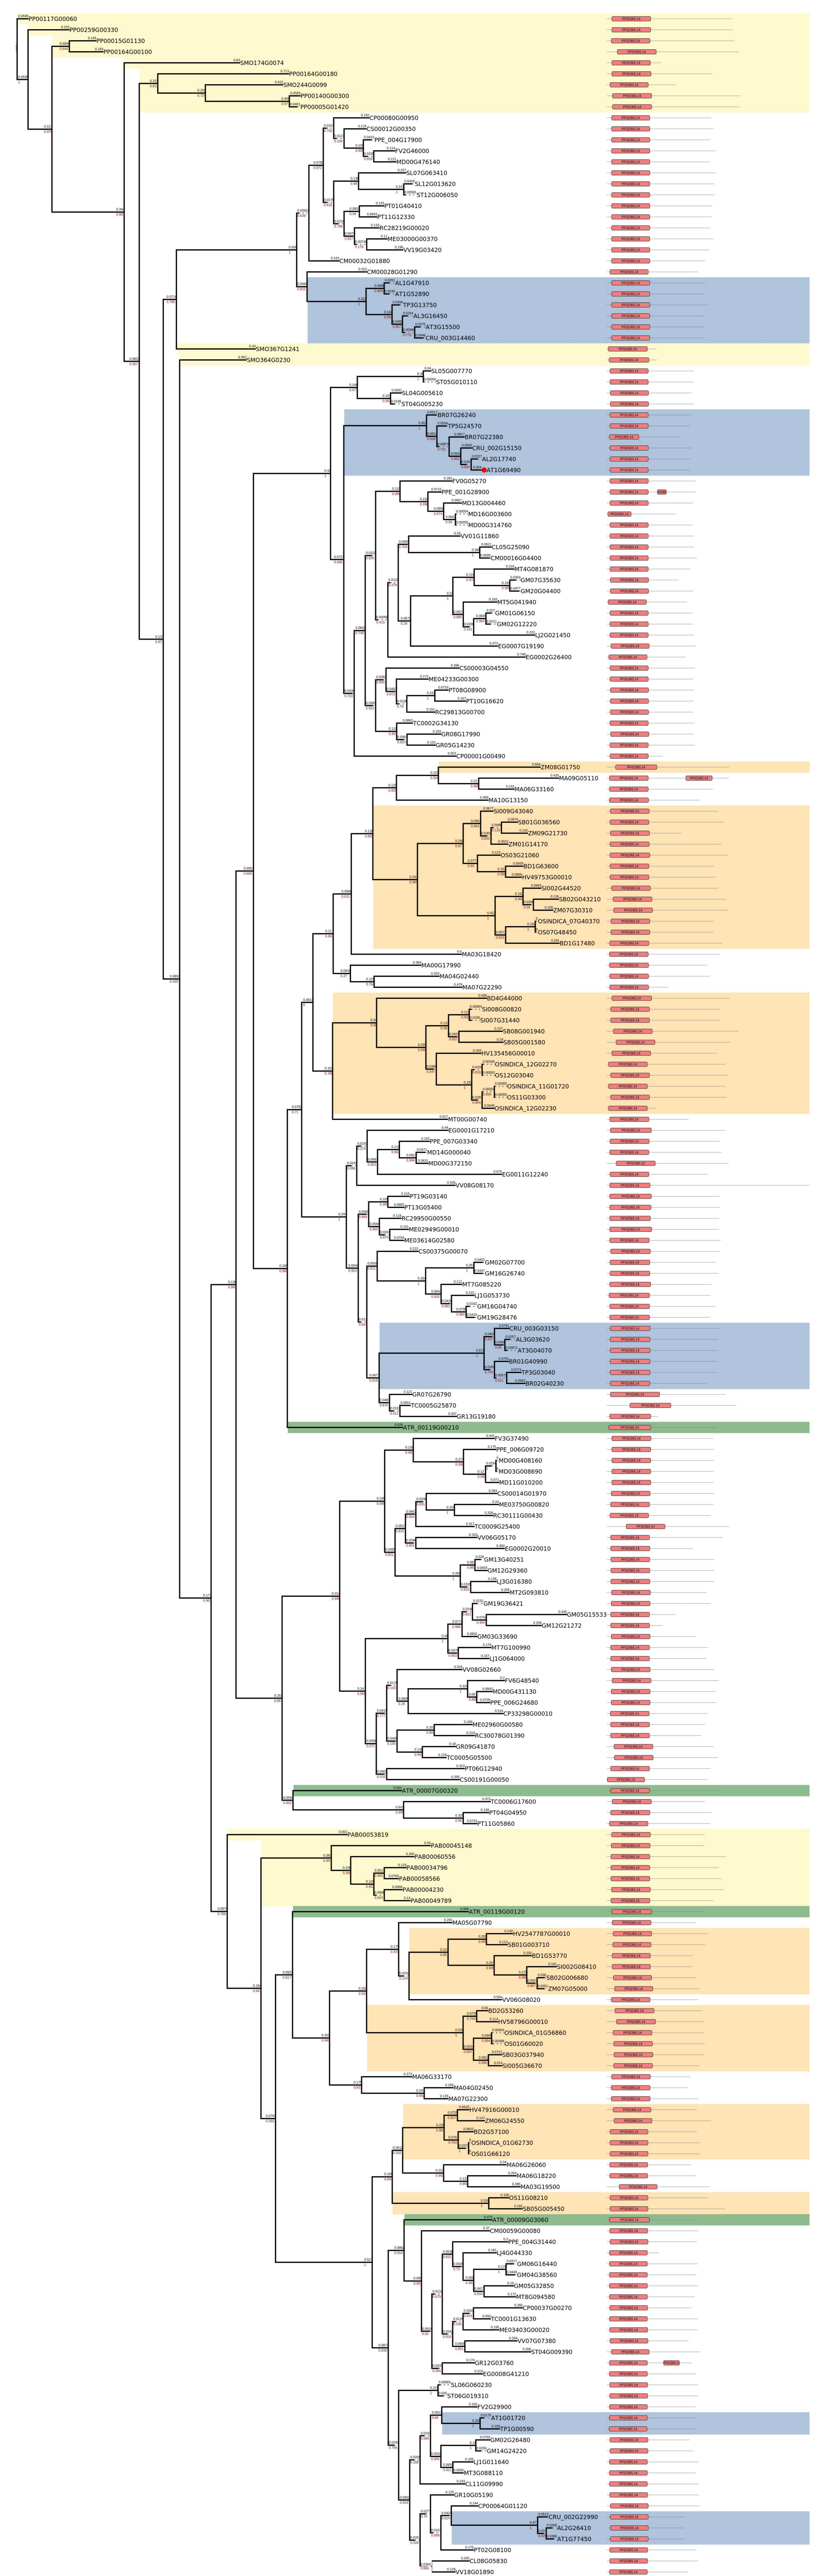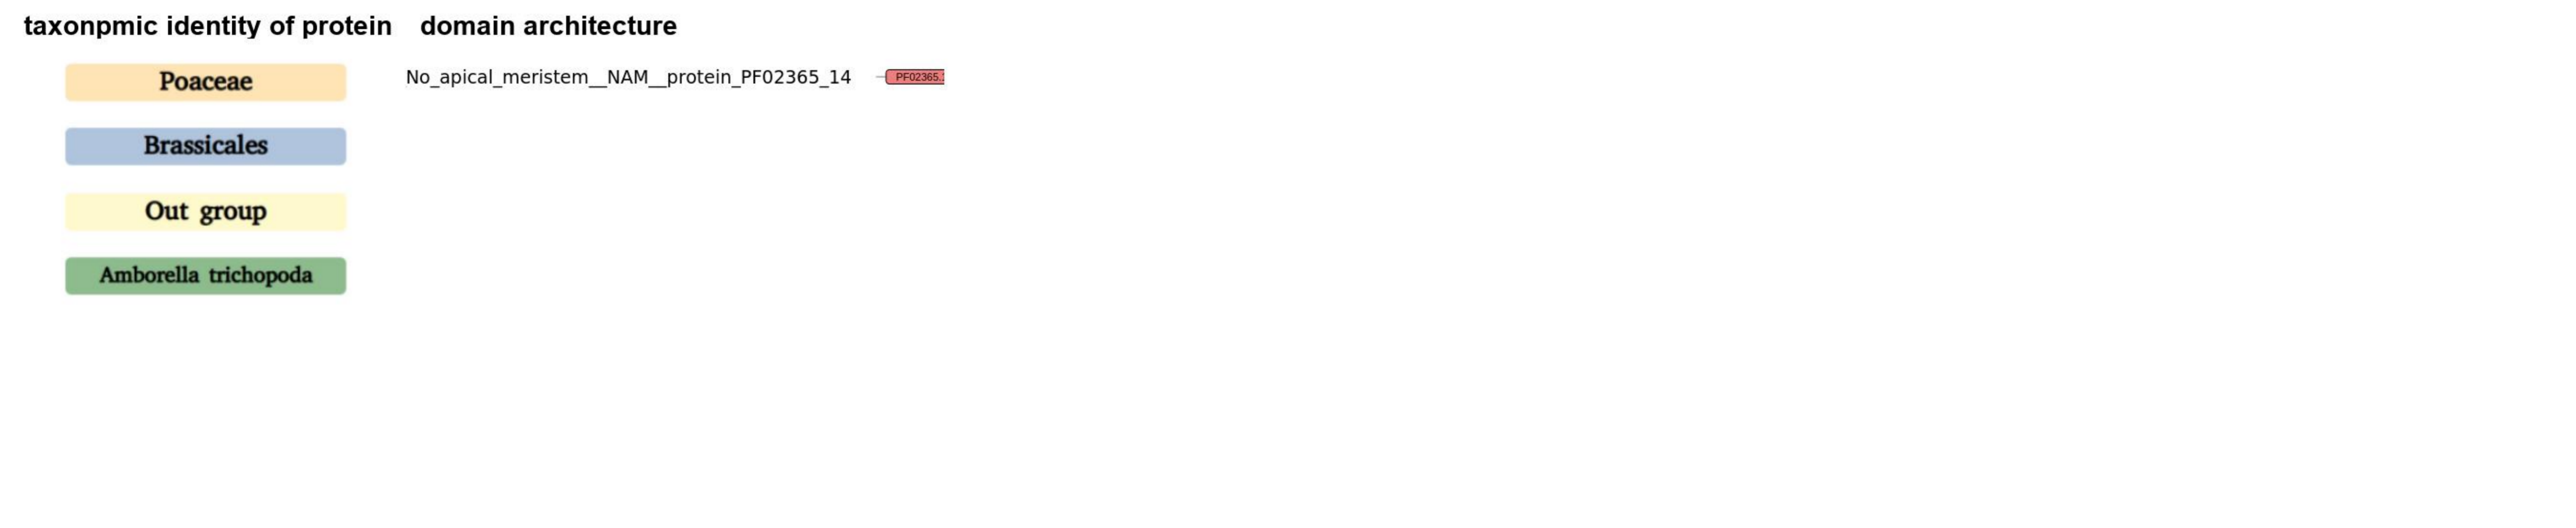



**Figure S23.** PhyML phylogenetic relations and composition of domains for AT1G75950 homologues of representative plant species. The color legends of species and domains is given below

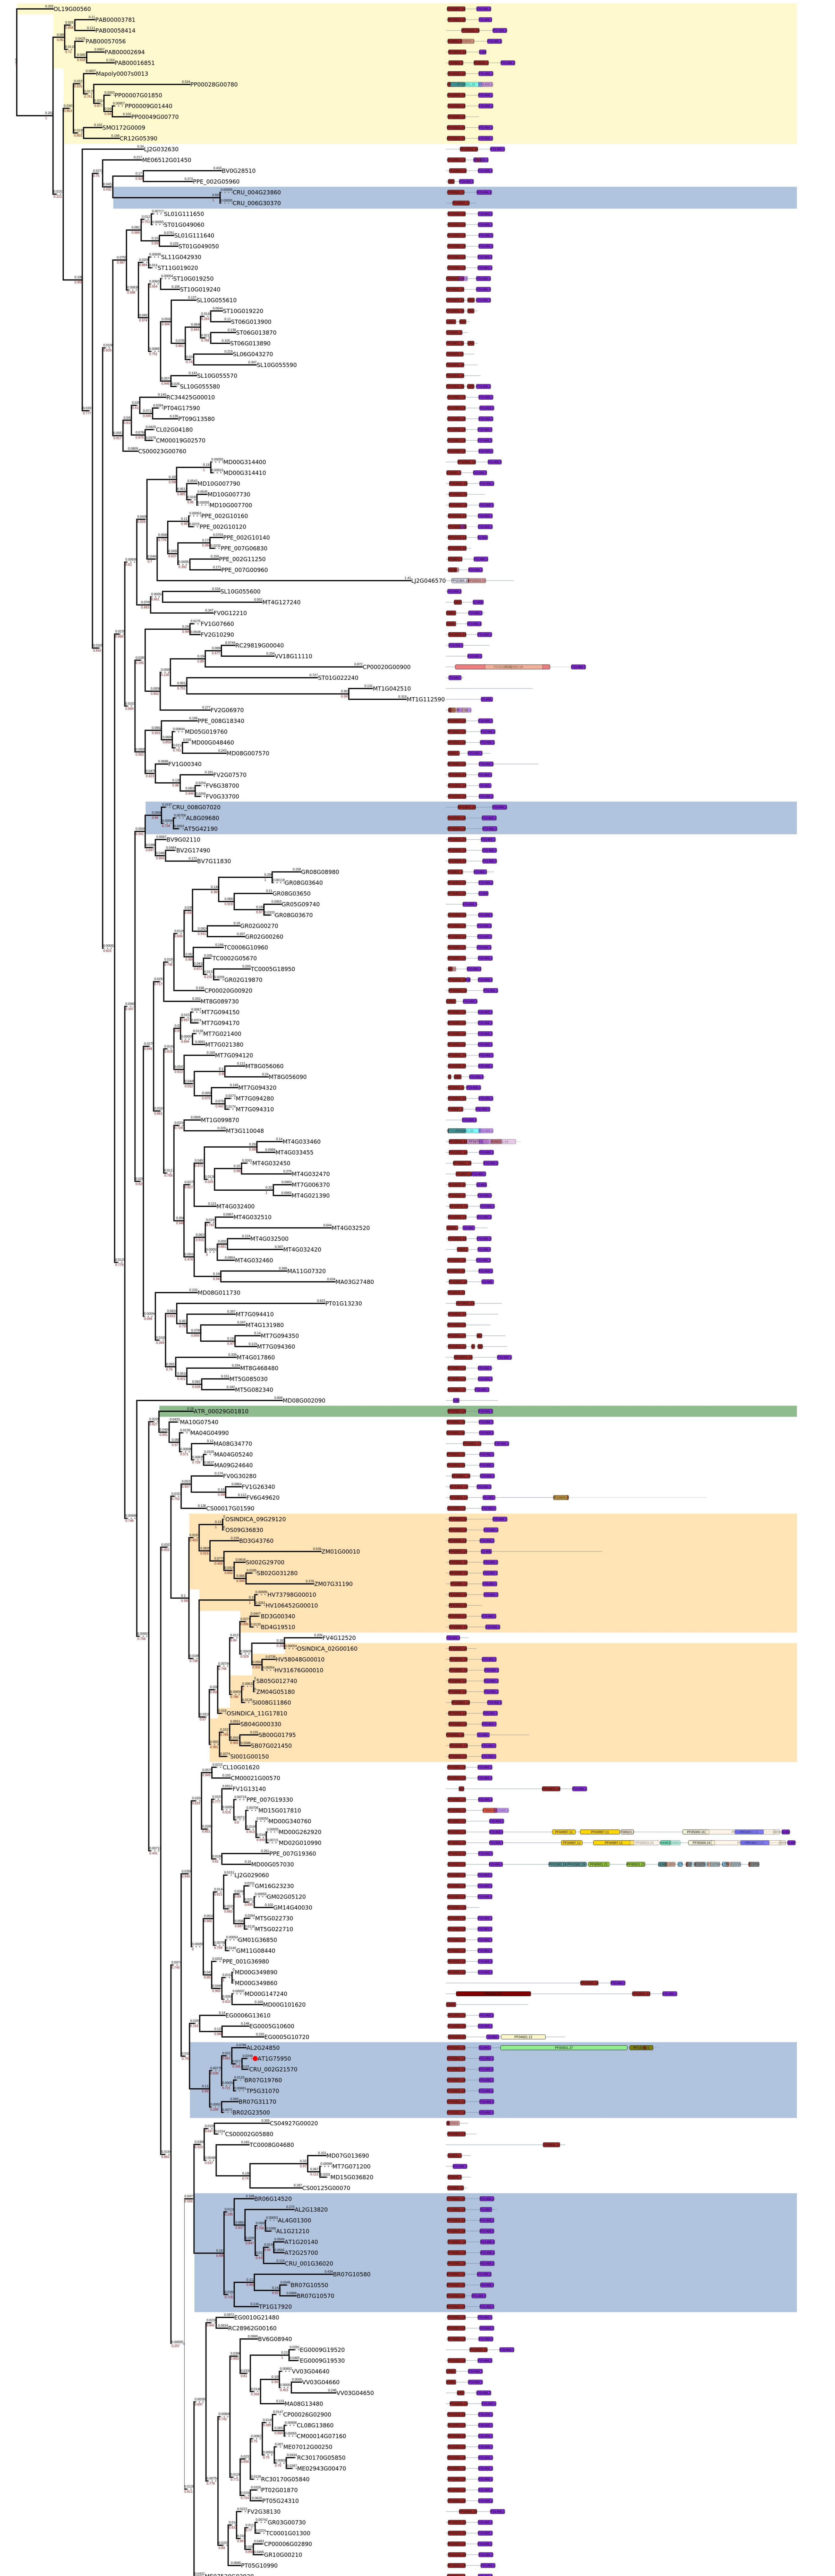

**taxonomic identity of protein**

- Poaceae Skp1\_family\_dimerisation\_domain\_FF01466\_18
- Brassicales Skp1\_family\_tetramerisation\_domain\_FF03931\_14
- Out group BTE\_PO2\_domain\_FF0051\_30
- Amborella trichopoda Ne\_apical\_meristem\_NAM\_protein\_FF03365\_14
- Amborella trichopoda D\_isomer\_specific\_2\_hydroxyacid\_dehydrogenase\_catalytic\_domain\_FF0389\_29
- Amborella trichopoda D\_isomer\_specific\_2\_hydroxyacid\_dehydrogenase\_NAD\_binding\_domain\_FF02826\_18
- Amborella trichopoda TIR\_beta\_subunit\_core\_domain\_FF02186\_14
- Amborella trichopoda Protein\_of\_unknown\_function\_DUF615\_FF04751\_13

**domain architecture**

- Zinc\_finger\_C3HC4\_type\_RING\_finger\_FF00097\_24
- Zinc\_finger\_C3HC4\_type\_RING\_finger\_FF13920\_5
- Ring\_finger\_domain\_FF13639\_5
- RING\_type\_zinc\_finger\_FF13445\_5
- RNA\_polymerase\_Rpb1\_domain\_1\_FF4997\_11
- RNA\_polymerase\_Rpb1\_domain\_2\_FF0623\_19
- RNA\_polymerase\_Rpb1\_domain\_4\_FF05000\_16
- RNA\_polymerase\_Rpb1\_domain\_5\_FF04998\_16
- RNA\_polymerase\_Rpb1\_domain\_6\_FF04992\_13
- RNA\_polymerase\_Rpb1\_domain\_3\_FF04993\_17
- Leucine\_Rich\_repeats\_2\_copies\_FF12799\_6
- RNA\_domain\_FF024\_25
- Leucine\_Rich\_repeats\_FF13555\_5
- NS\_ARC\_domain\_FF0931\_21
- TIR\_domain\_FF01582\_19
- GDSL\_like\_Lipase\_Acylhydrolase\_FF00657\_21
- Domain\_of\_unknown\_function\_DUF569\_FF04601\_12
- AMP\_binding\_enzyme\_FF0501\_27
- AMP\_binding\_enzyme\_C\_terminal\_domain\_FF13193\_5



**Figure S24.** PhyML phylogenetic relations and composition of domains for AT1G80350 homologues of representative plant species. The color legends of species and domains is given below

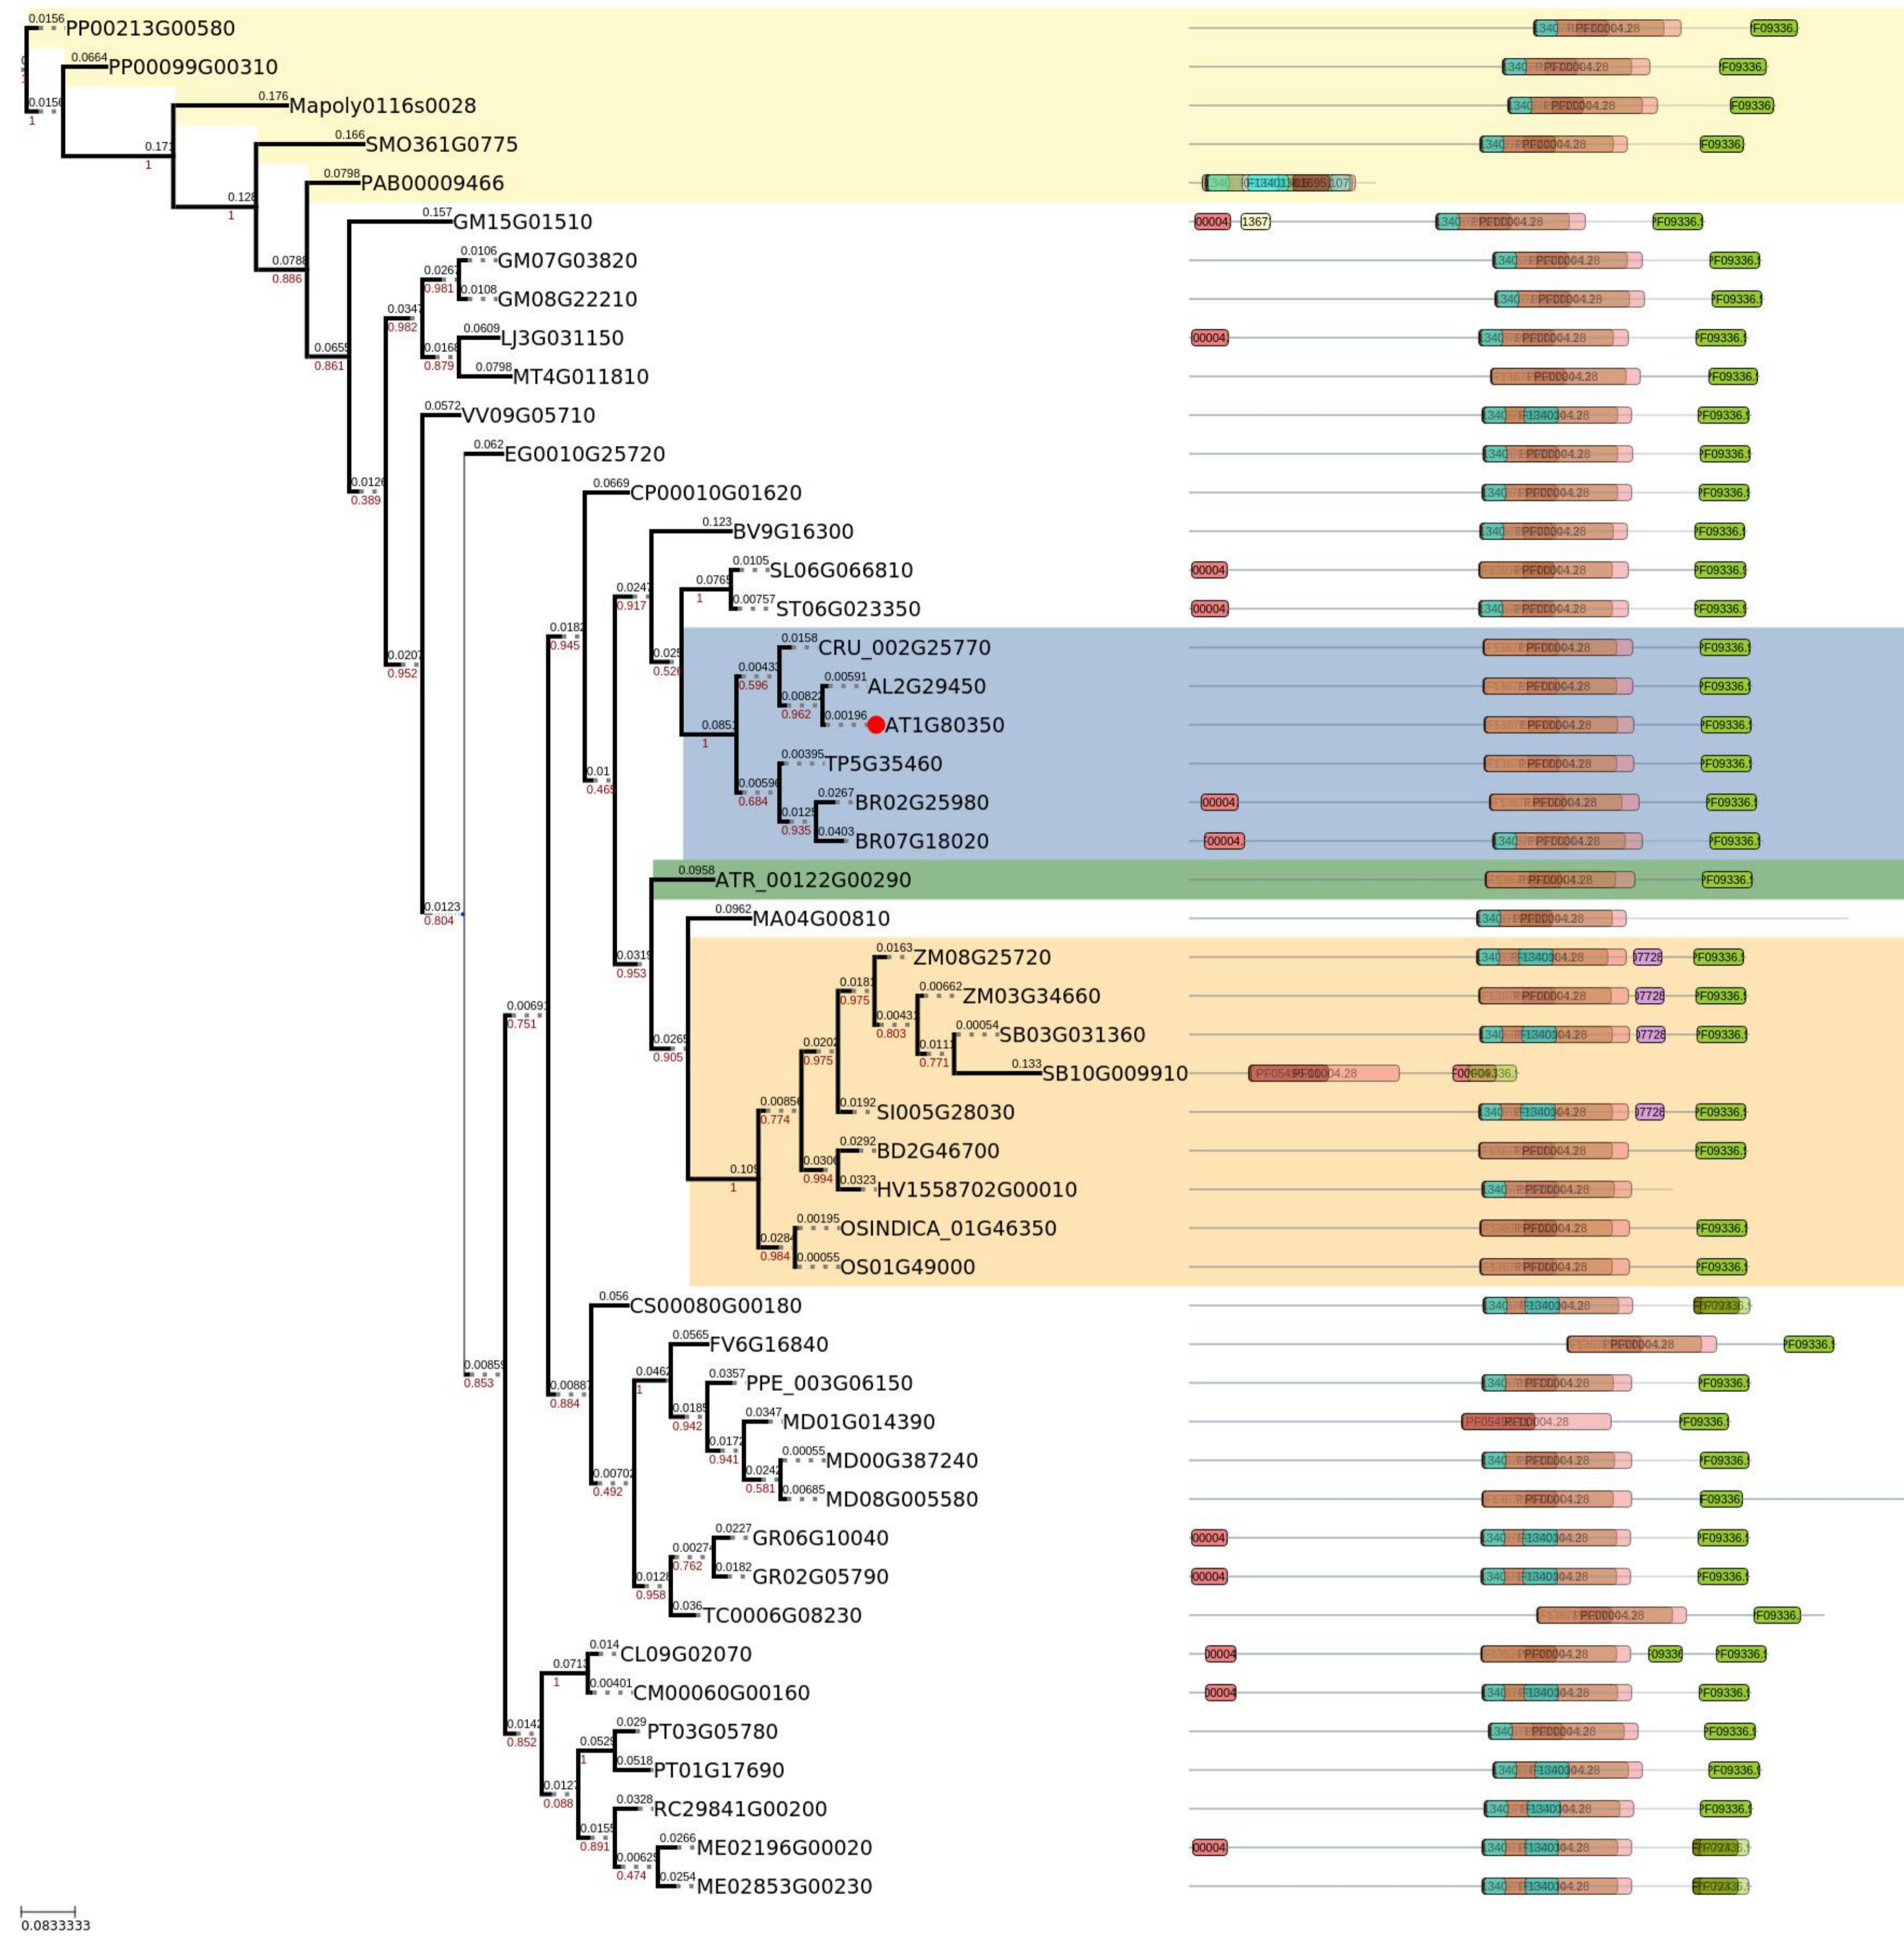

taxonpmc identity of protein

domain architecture

- Poaceae**
- Brassicales**
- Out group**
- Amborella trichopoda**

- ATPase\_family\_associated\_with\_various\_cellular\_activities\_\_AAA\_\_PF00004\_28
- AAA\_domain\_Cdc48\_subfamily\_\_PF07724\_13
- AAA\_domain\_PF13401\_5
- AAA\_domain\_PF13671\_5
- AAA\_domain\_dynein\_related\_subfamily\_\_PF07728\_13
- Holliday\_junction\_DNA\_helicase\_ruvB\_N\_terminus\_PF05496\_11
- Vps4\_C\_terminal\_oligomerisation\_domain\_PF09336\_9
- AAA\_ATPase\_domain\_PF13191\_5

- AAA\_domain\_PF13238\_5
- IstB\_like\_ATP\_binding\_protein\_PF01695\_16
- Magnesium\_chelatase\_subunit\_ChII\_PF01078\_20
- TIP49\_C\_terminus\_PF06068\_12

0.0833333
