# Supplementary material for: The evolution of gene regulatory networks controlling Arabidopsis thaliana L. trichome development
Source: PubMed Central journal article supplement (PMC6393967; doi:10.1186/s12870-019-1640-2), 2019-02-15
Supplement: 12870_2019_1640_MOESM9_ESM.pdf [file 12870_2019_1640_MOESM9_ESM.pdf]

**Figure S25.** PhyML phylogenetic relations and composition of domains for AT2G02480 homologues of representative plant species. The color legends of species and domains is given below

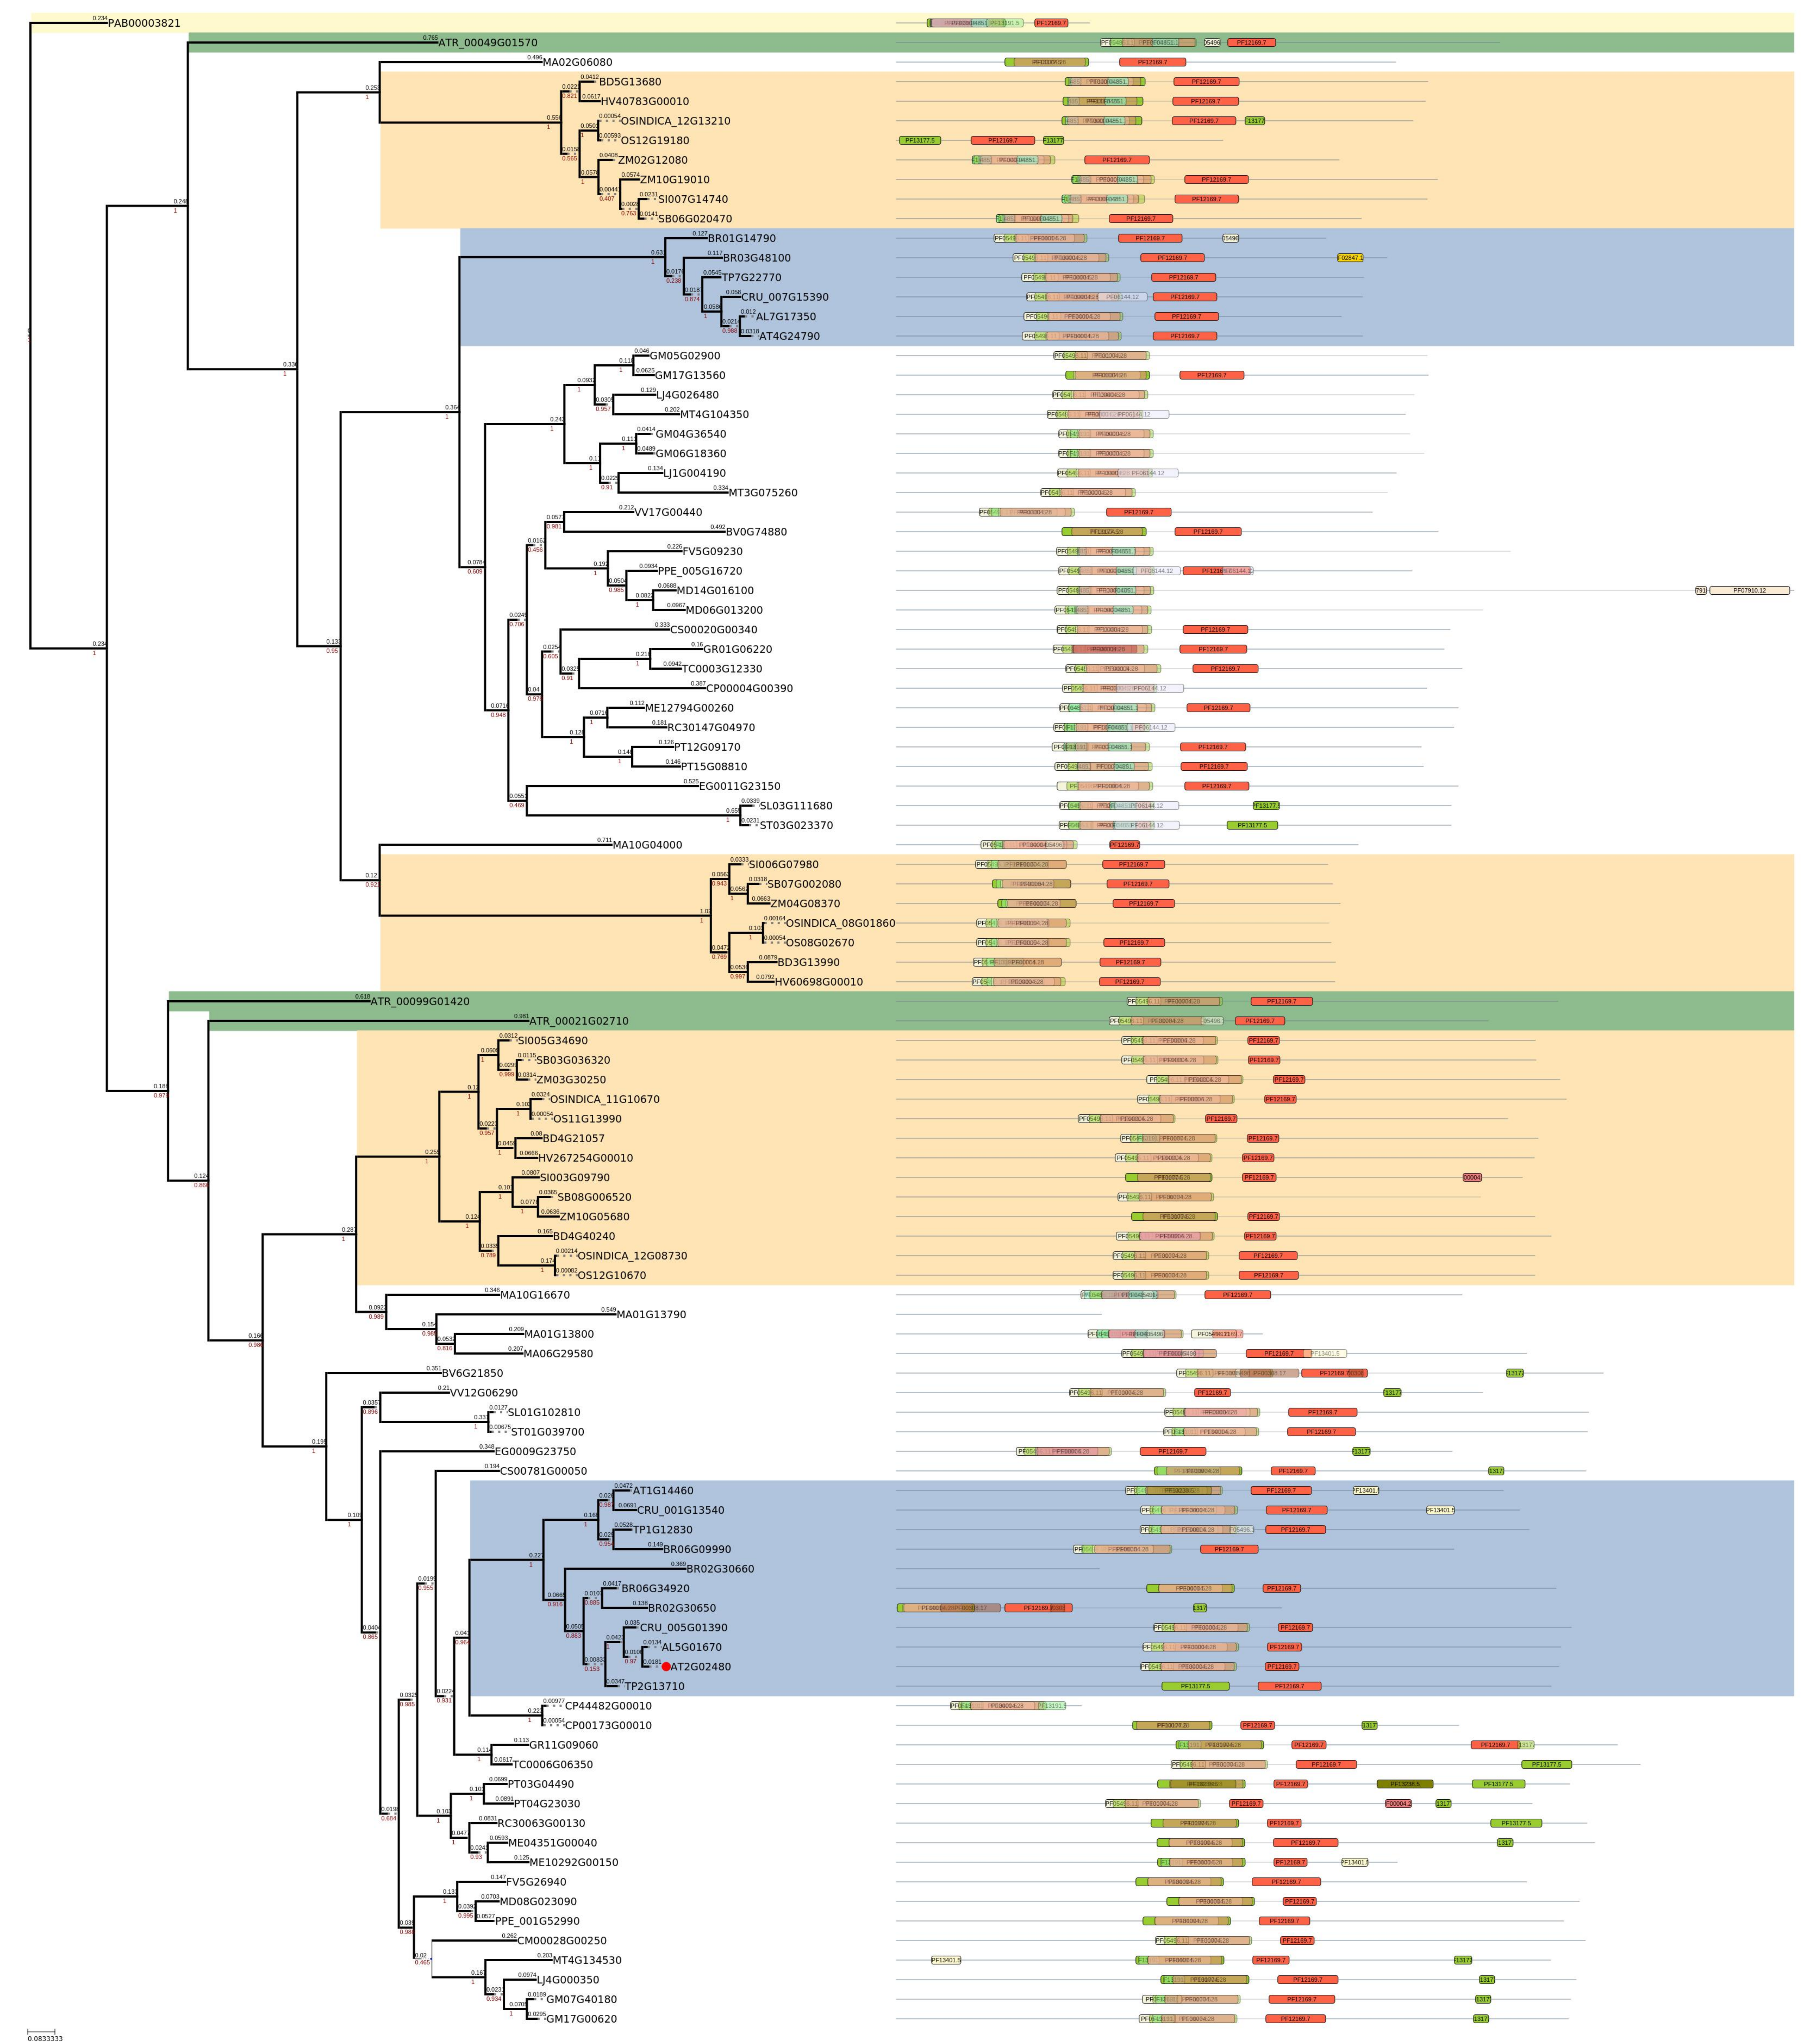

| taxonomic identity of protein | domain architecture                                                        |
|-------------------------------|----------------------------------------------------------------------------|
| <b>Poaceae</b>                | ATPase_family_associated_with_various_cellular_activities__AAA__PF00004_28 |
| <b>Brassicales</b>            | AAA_ATPase_domain_PF13191_5                                                |
| <b>Out group</b>              | AAA_domain_PF13401_5                                                       |
| <b>Amborella trichopoda</b>   | AAA_domain_dynein_related_subfamily_PF07728_13                             |
|                               | DNA_polymerase_III_delta_subunit_PF13177_5                                 |
|                               | DNA_polymerase_III_subunits_gamma_and_tau_domain_III_PF12169_7             |
|                               | Type_III_restriction_enzyme_res_subunit_PF04851_14                         |
|                               | Holliday_junction_DNA_helicase_ruvB_N_terminus_PF05496_11                  |
|                               | MA3_domain_PF02847_16                                                      |
|                               | DNA_polymerase_III_delta_subunit_PF06144_12                                |
|                               | Peptidase_family_C78_PF07910_12                                            |
|                               | AAA_domain_PF13671_5                                                       |
|                               | AAA_domain_PF13173_5                                                       |
|                               | Bacterial_dnaA_protein_PF00308_17                                          |
|                               | AAA_domain_PF13238_5                                                       |



**Figure S26.** PhyML phylogenetic relations and composition of domains for AT2G22640 homologues of representative plant species. The color legends of species and domains is given below

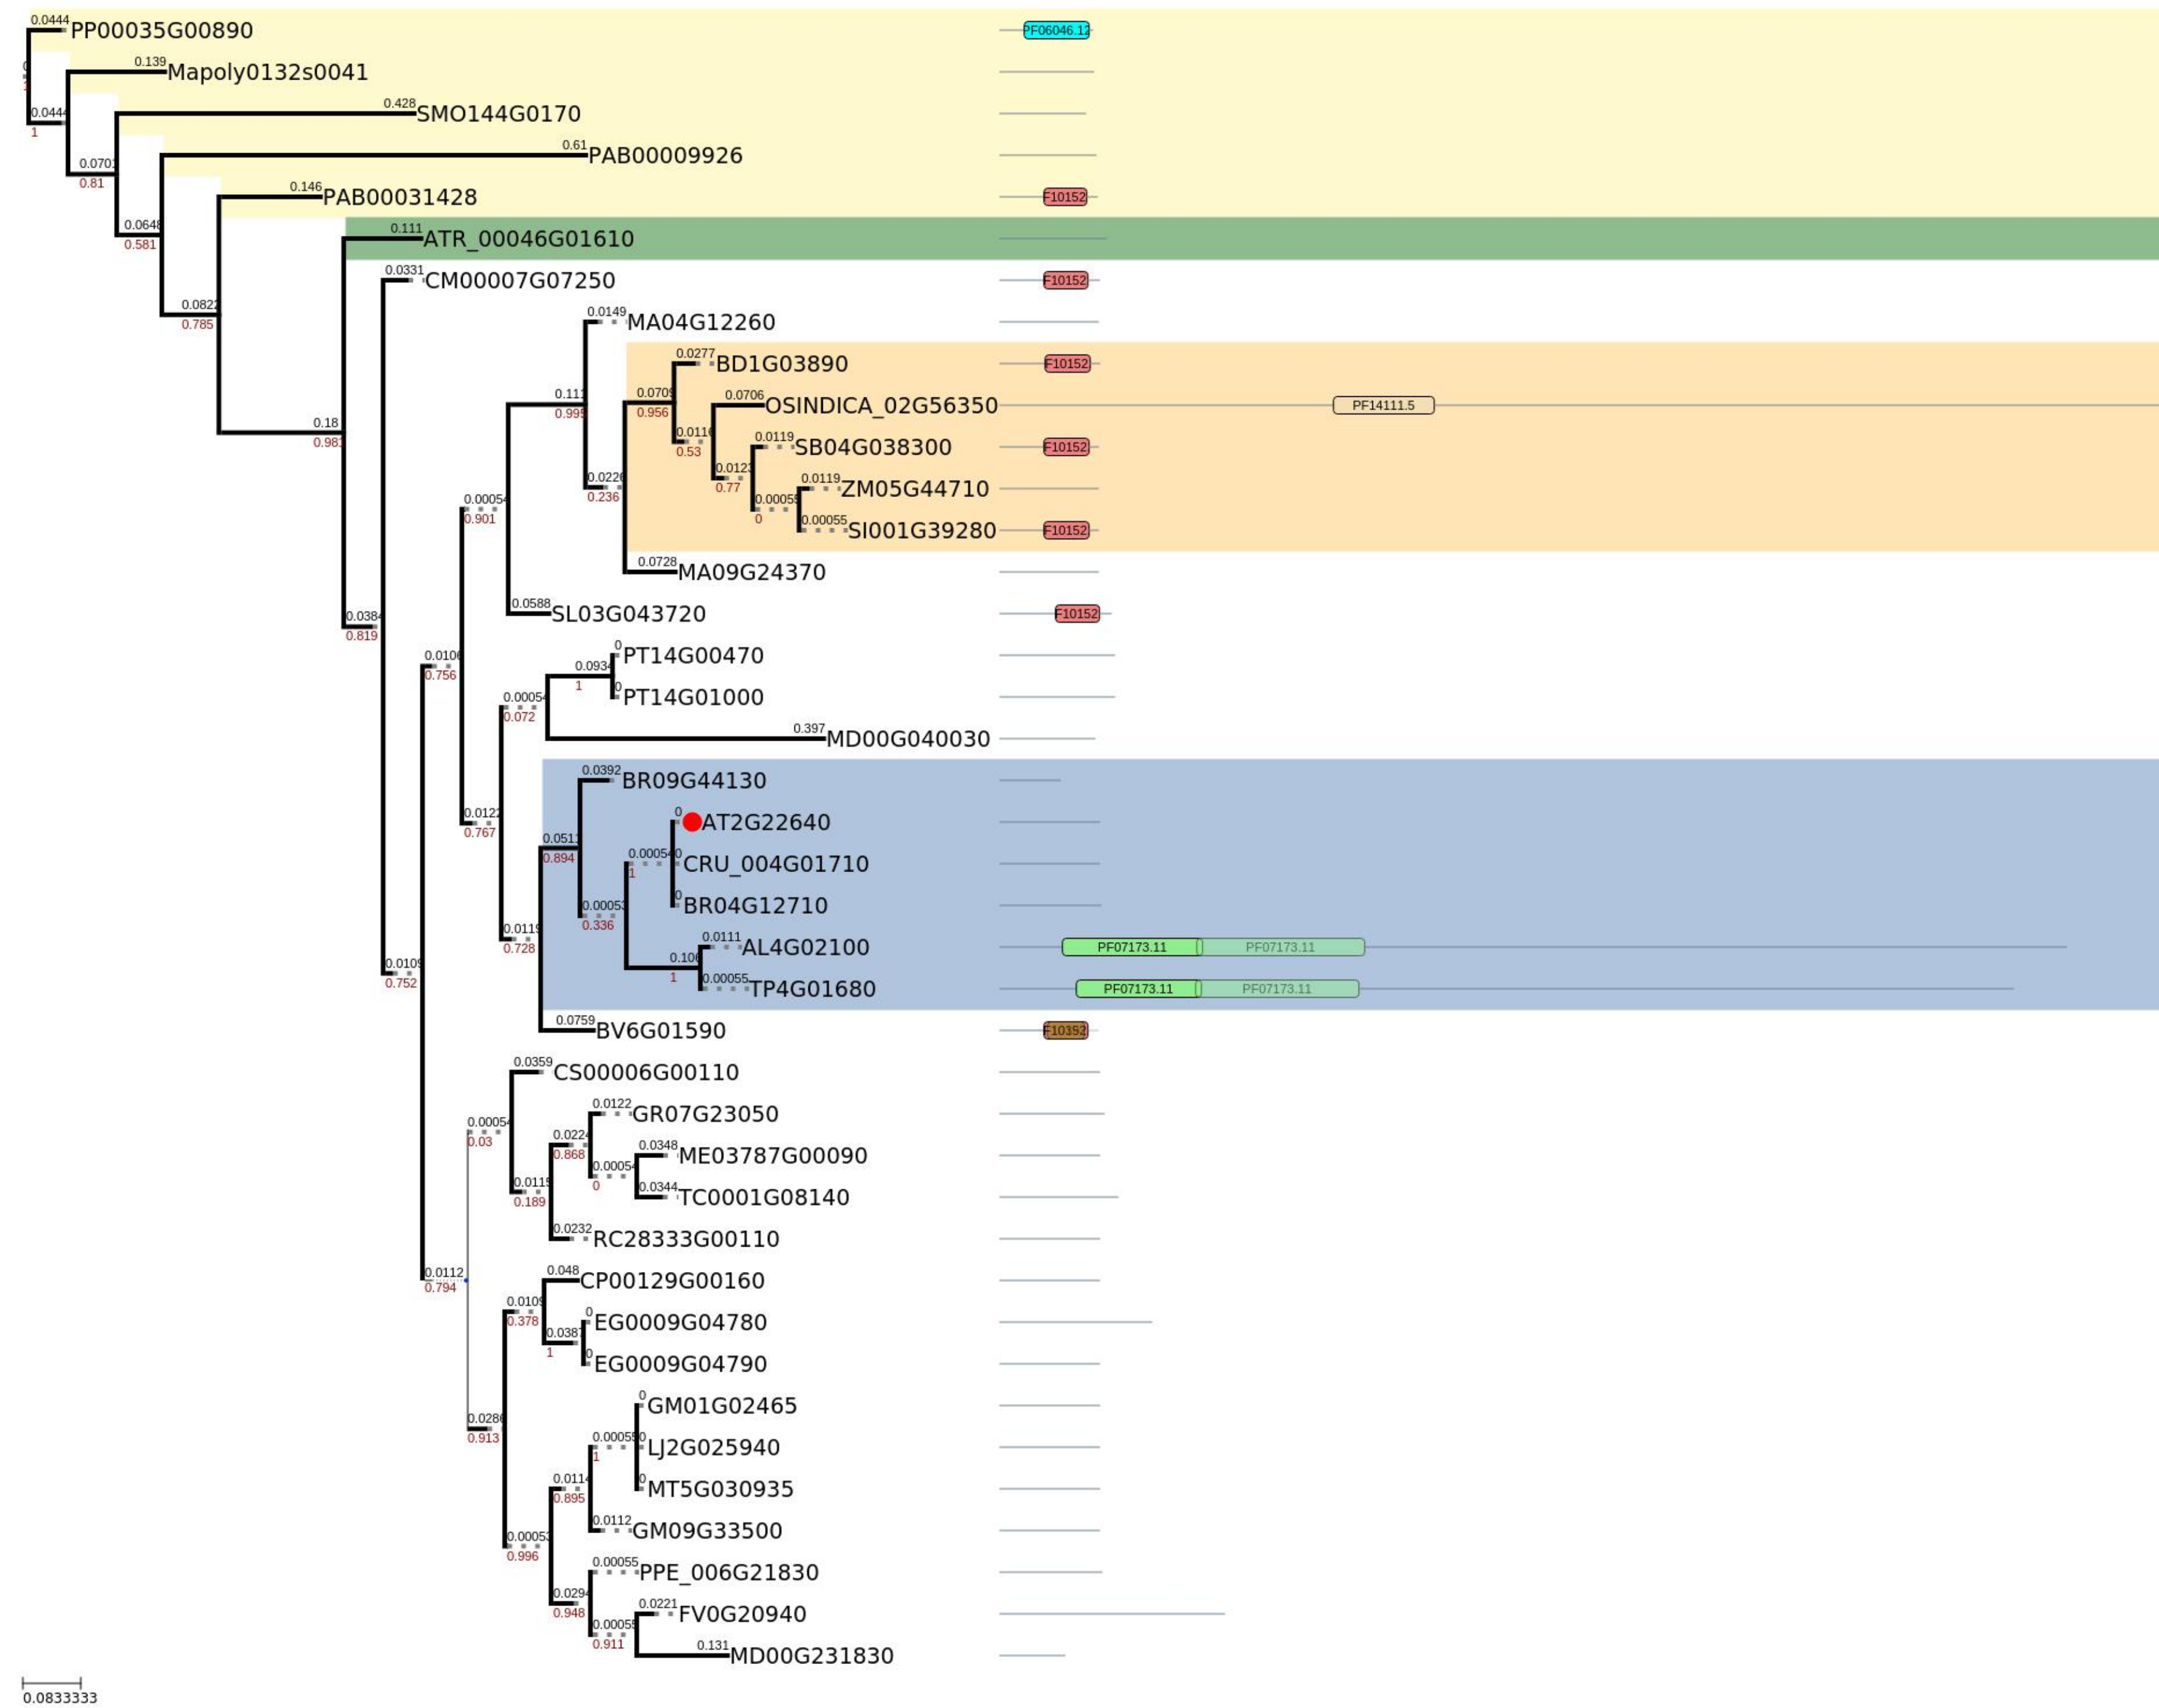

taxonpmic identity of protein    domain architecture

|                             |                                                                   |            |
|-----------------------------|-------------------------------------------------------------------|------------|
| <b>Poaceae</b>              | Exocyst_complex_component_Sec6_PF06046_12                         | PF06046.12 |
|                             | Subunit_CCDC53_of_WASH_complex_PF10152_8                          | PF10152.8  |
| <b>Brassicales</b>          | Domain_of_unknown_function_DUF4283_PF14111_5                      | PF14111.5  |
|                             | Glycine_rich_domain_containing_protein_like_PF07173_11            | PF07173.11 |
| <b>Out group</b>            | Trimeric_coiled_coil_oligomerisation_domain_of_matrilin_PF10393_8 | PF10393.8  |
| <b>Amborella trichopoda</b> |                                                                   |            |



**Figure S27.** PhyML phylogenetic relations and composition of domains for AT2G27300 homologues of representative plant species. The color legends of species and domains is given below

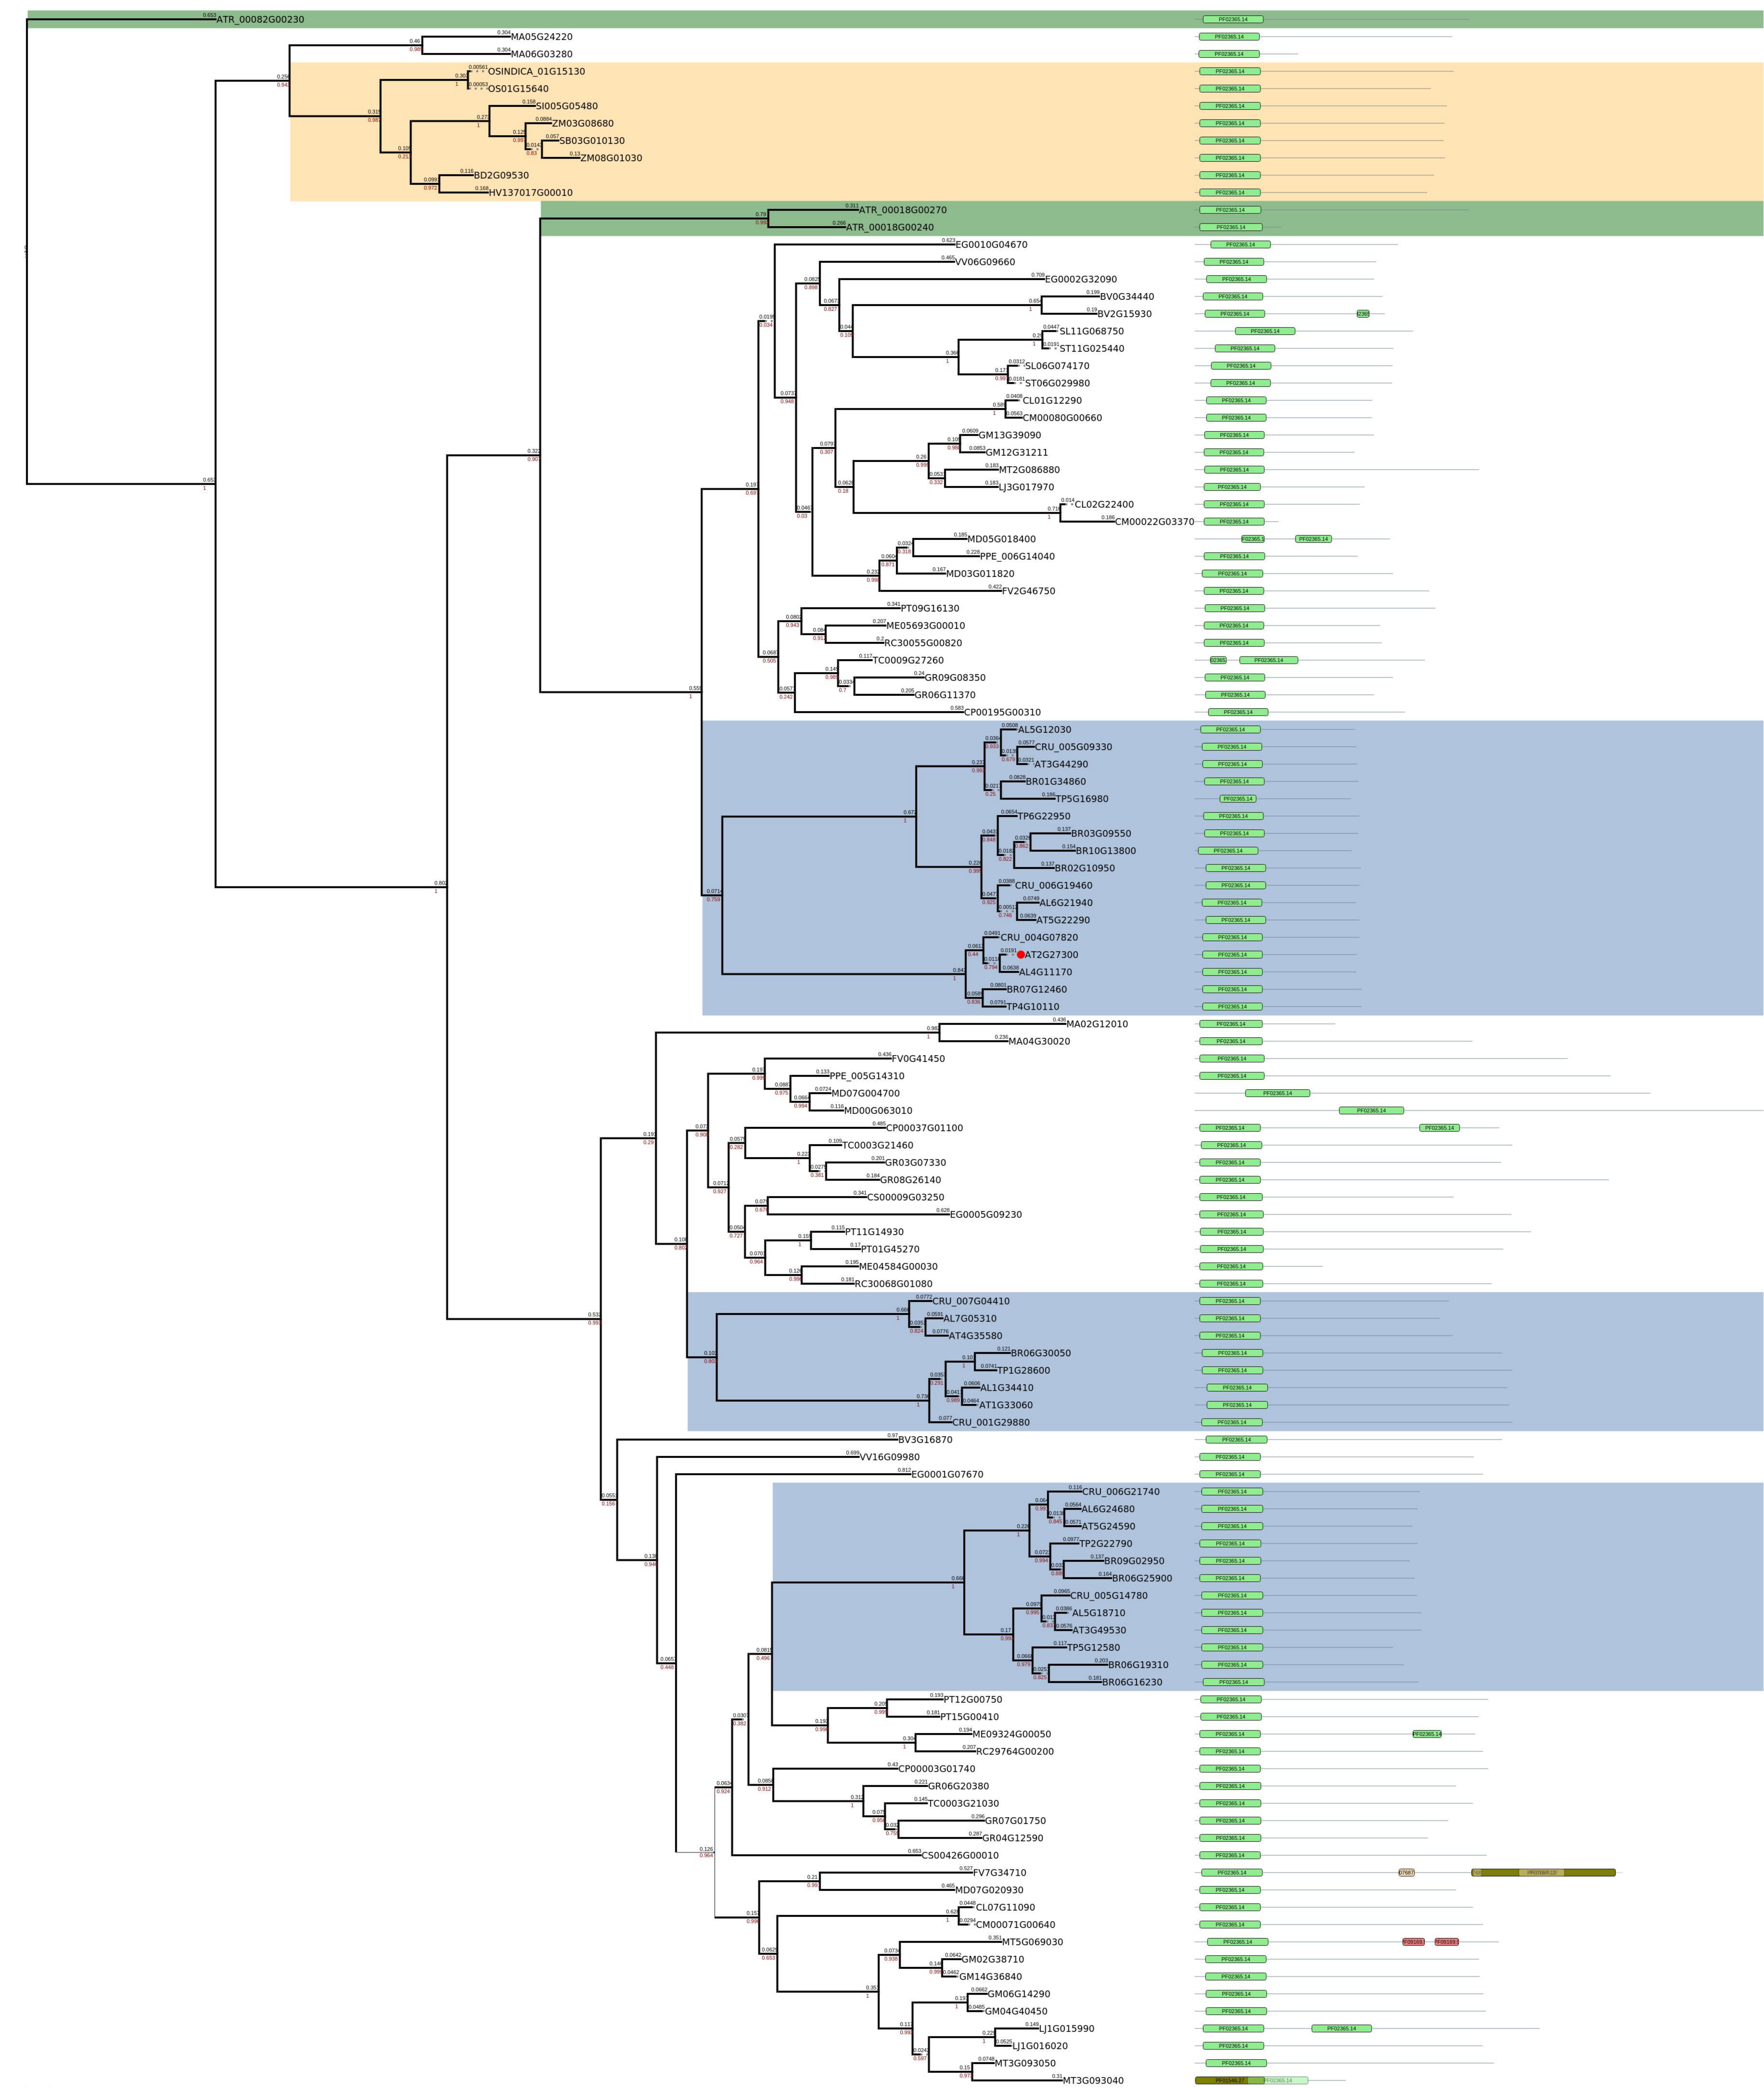

0.0833333

**taxonpmc identity of protein domain architecture**

|                             |                                          |  |
|-----------------------------|------------------------------------------|--|
| <b>Poaceae</b>              | No_apical_meristem_NAM_PF02365_14        |  |
|                             | Peptidase_dimerisation_domain_PF07687_13 |  |
| <b>Brassicales</b>          | Peptidase_family_M20_M25_M40_PF01546_27  |  |
| <b>Out group</b>            | BRCA2_helical_PF09169_9                  |  |
| <b>Amborella trichopoda</b> |                                          |  |



**Figure S28.** PhyML phylogenetic relations and composition of domains for AT2G27600 homologues of representative plant species. The color legends of species and domains is given below

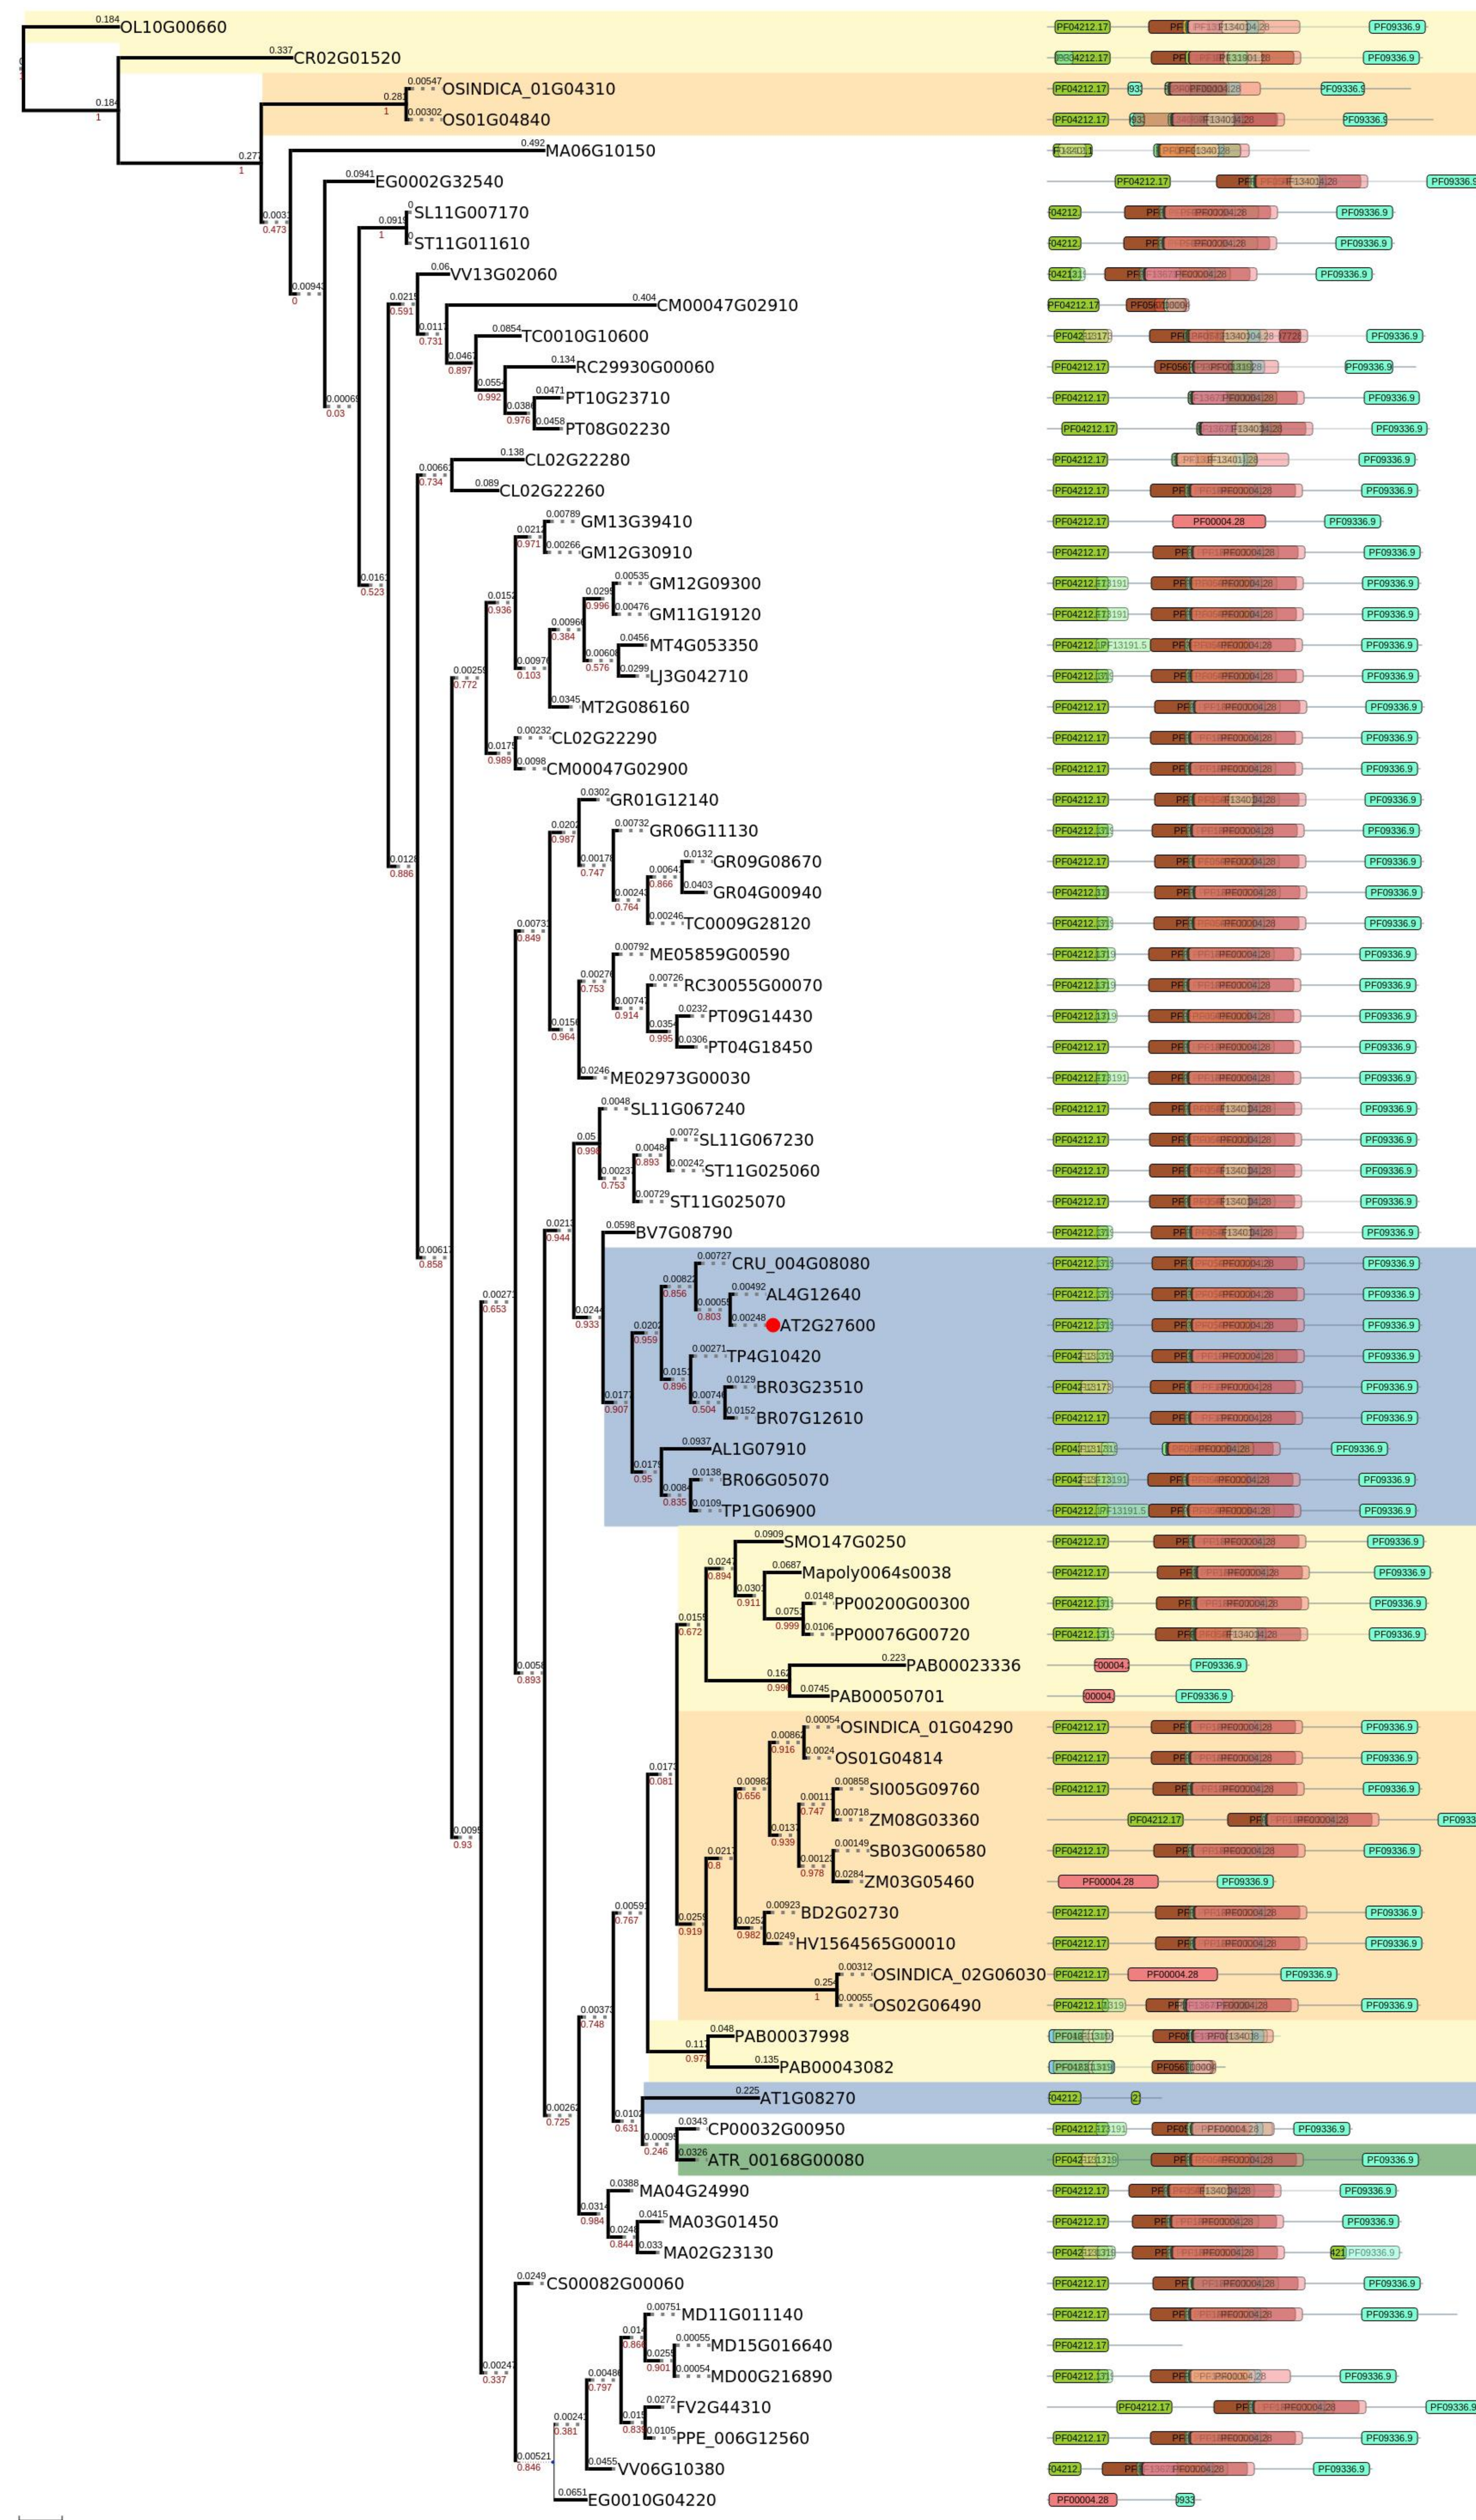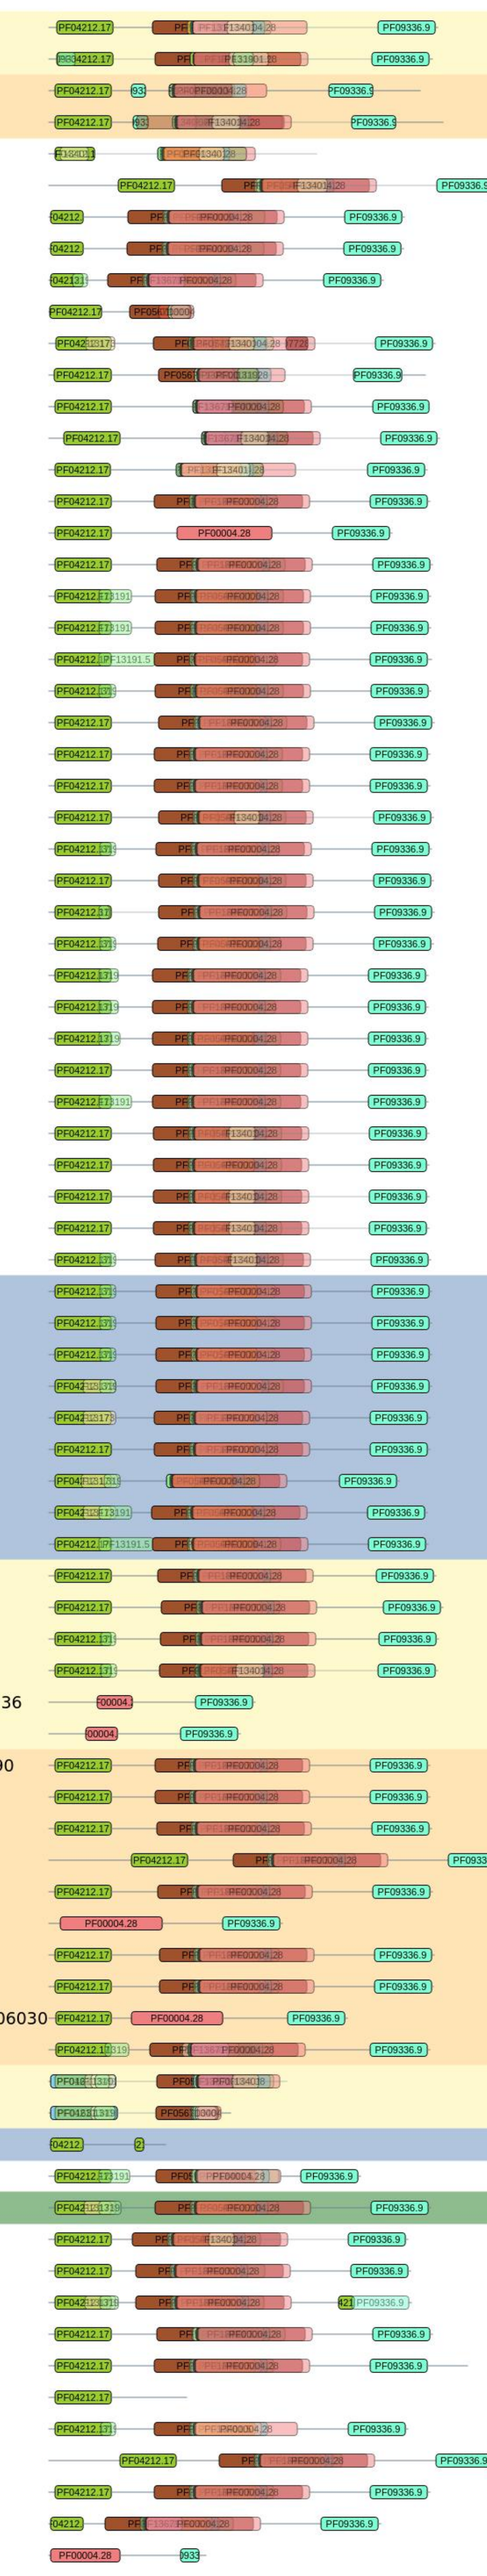

0.0833333

taxonpmic identity of protein

domain architecture

- Poaceae**
- Brassicales**
- Out group**
- Amborella trichopoda**

- ATPase\_family\_associated\_with\_various\_cellular\_activities\_AAA\_PF00004\_28
- AAA\_domain\_PF13173\_5
- AAA\_ATPase\_domain\_PF13191\_5
- AAA\_domain\_Cdc48\_subfamily\_PF07724\_13
- AAA\_domain\_PF13401\_5
- AAA\_domain\_PF13671\_5
- AAA\_domain\_dynein\_related\_subfamily\_PF07728\_13
- Protein\_of\_unknown\_function\_DUF815\_PF05673\_12

- IstB\_like\_ATP\_binding\_protein\_PF01695\_16
- MIT\_microtubule\_interacting\_and\_transport\_domain\_PF04212\_17
- Holliday\_junction\_DNA\_helicase\_ruvB\_N\_terminus\_PF05496\_11
- TIP49\_C\_terminus\_PF06068\_12
- Vps4\_C\_terminal\_oligomerisation\_domain\_PF09336\_9
- AAA\_domain\_PF13238\_5
- Parvovirus\_non\_structural\_protein\_NS1\_PF01057\_16
- ATPase\_domain\_predominantly\_from\_Archaea\_PF01637\_17



**Figure S29.** PhyML phylogenetic relations and composition of domains for AT2G31300 homologues of representative plant species. The color legends of species and domains is given below

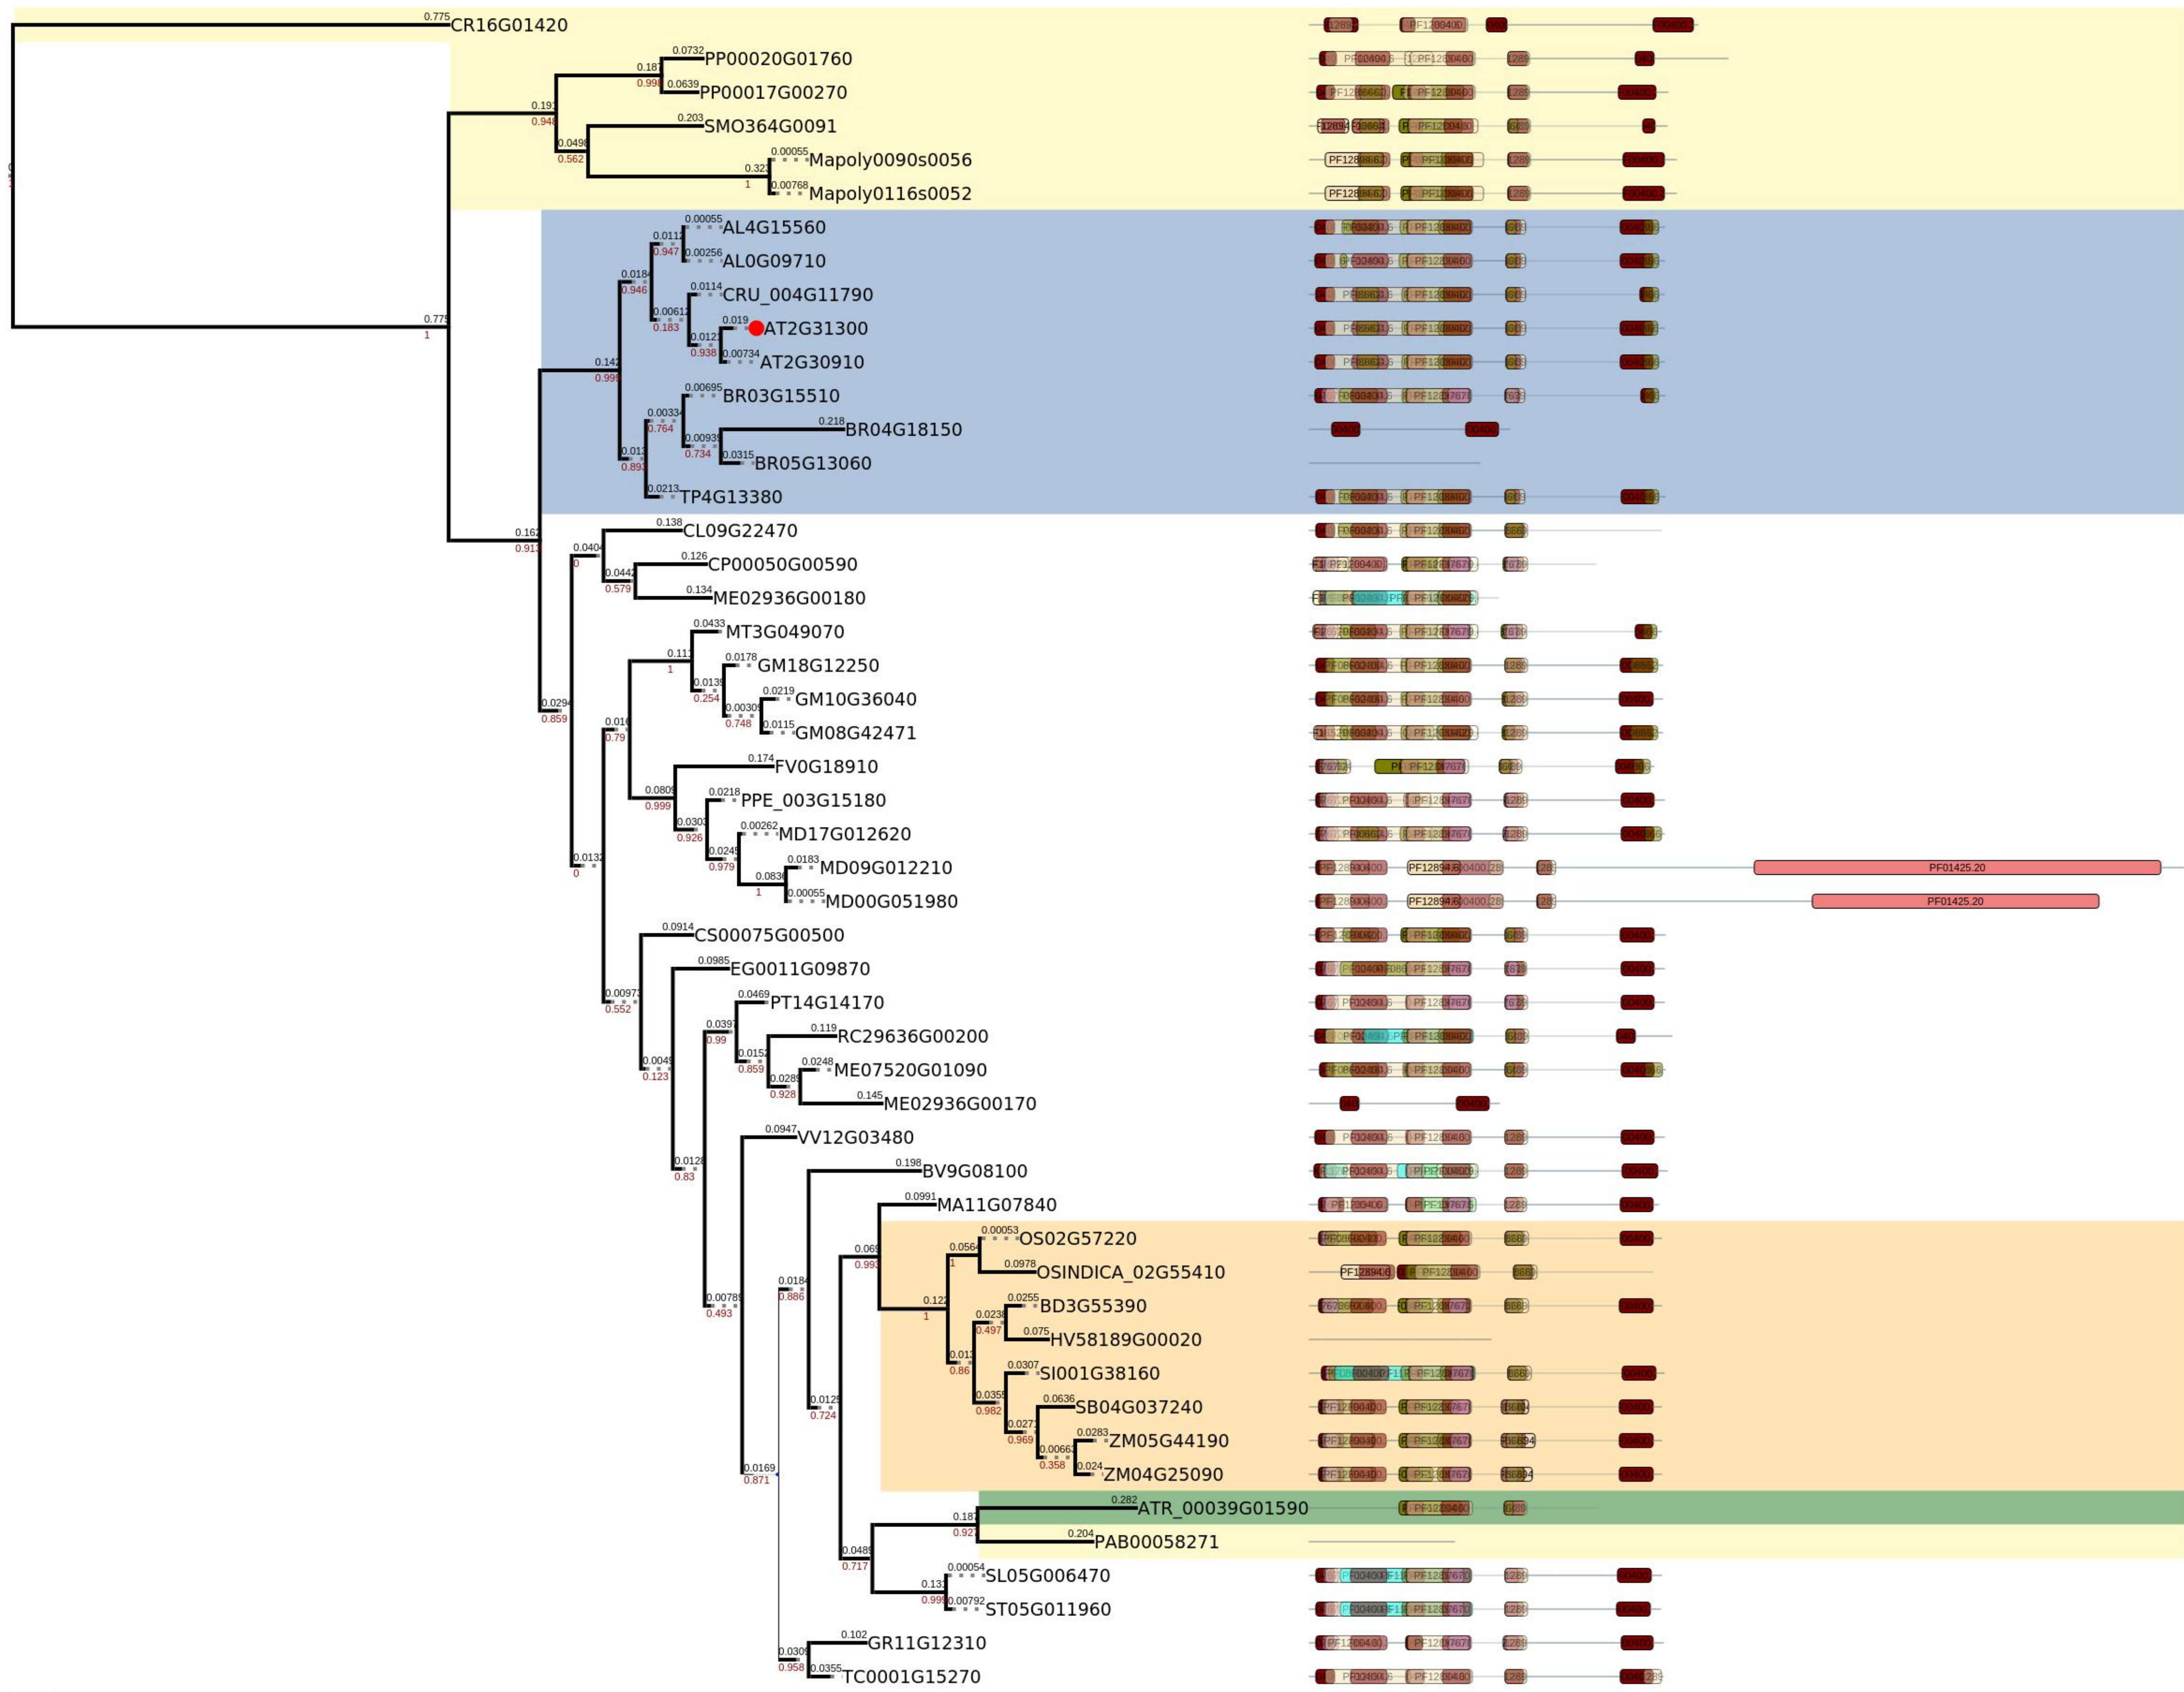

taxonomic identity of protein

domain architecture

Poaceae

Anaphase\_promoting\_complex\_subunit\_4\_WD40\_domain\_PF12894\_6

PF12894.6

WD\_domain\_G\_beta\_repeat\_PF00400\_31

PF00400.31

Brassicales

Eukaryotic\_translation\_initiation\_factor\_eIF2A\_PF08662\_10

PF08662.10

WD40\_like\_Beta\_Propeller\_Repeat\_PF07676\_11

PF07676.11

Out group

WD40\_region\_of\_Ge1\_enhancer\_of\_mRNA\_decapping\_protein\_PF16529\_4

PF16529.4

WD\_repeat\_containing\_and\_planar\_cell\_polarity\_effector\_protein\_Fritz\_PF11768\_7

PF11768.7

Amidase\_PF01425\_20

PF01425.20

BNR\_repeat\_like\_domain\_PF13859\_5

PF13859.5

Amborella trichopoda



**Figure S30.** Phylogenetic relations and composition of domains for AT2G33540 homologues of representative plant species.  
The color legends of species and domains is given below

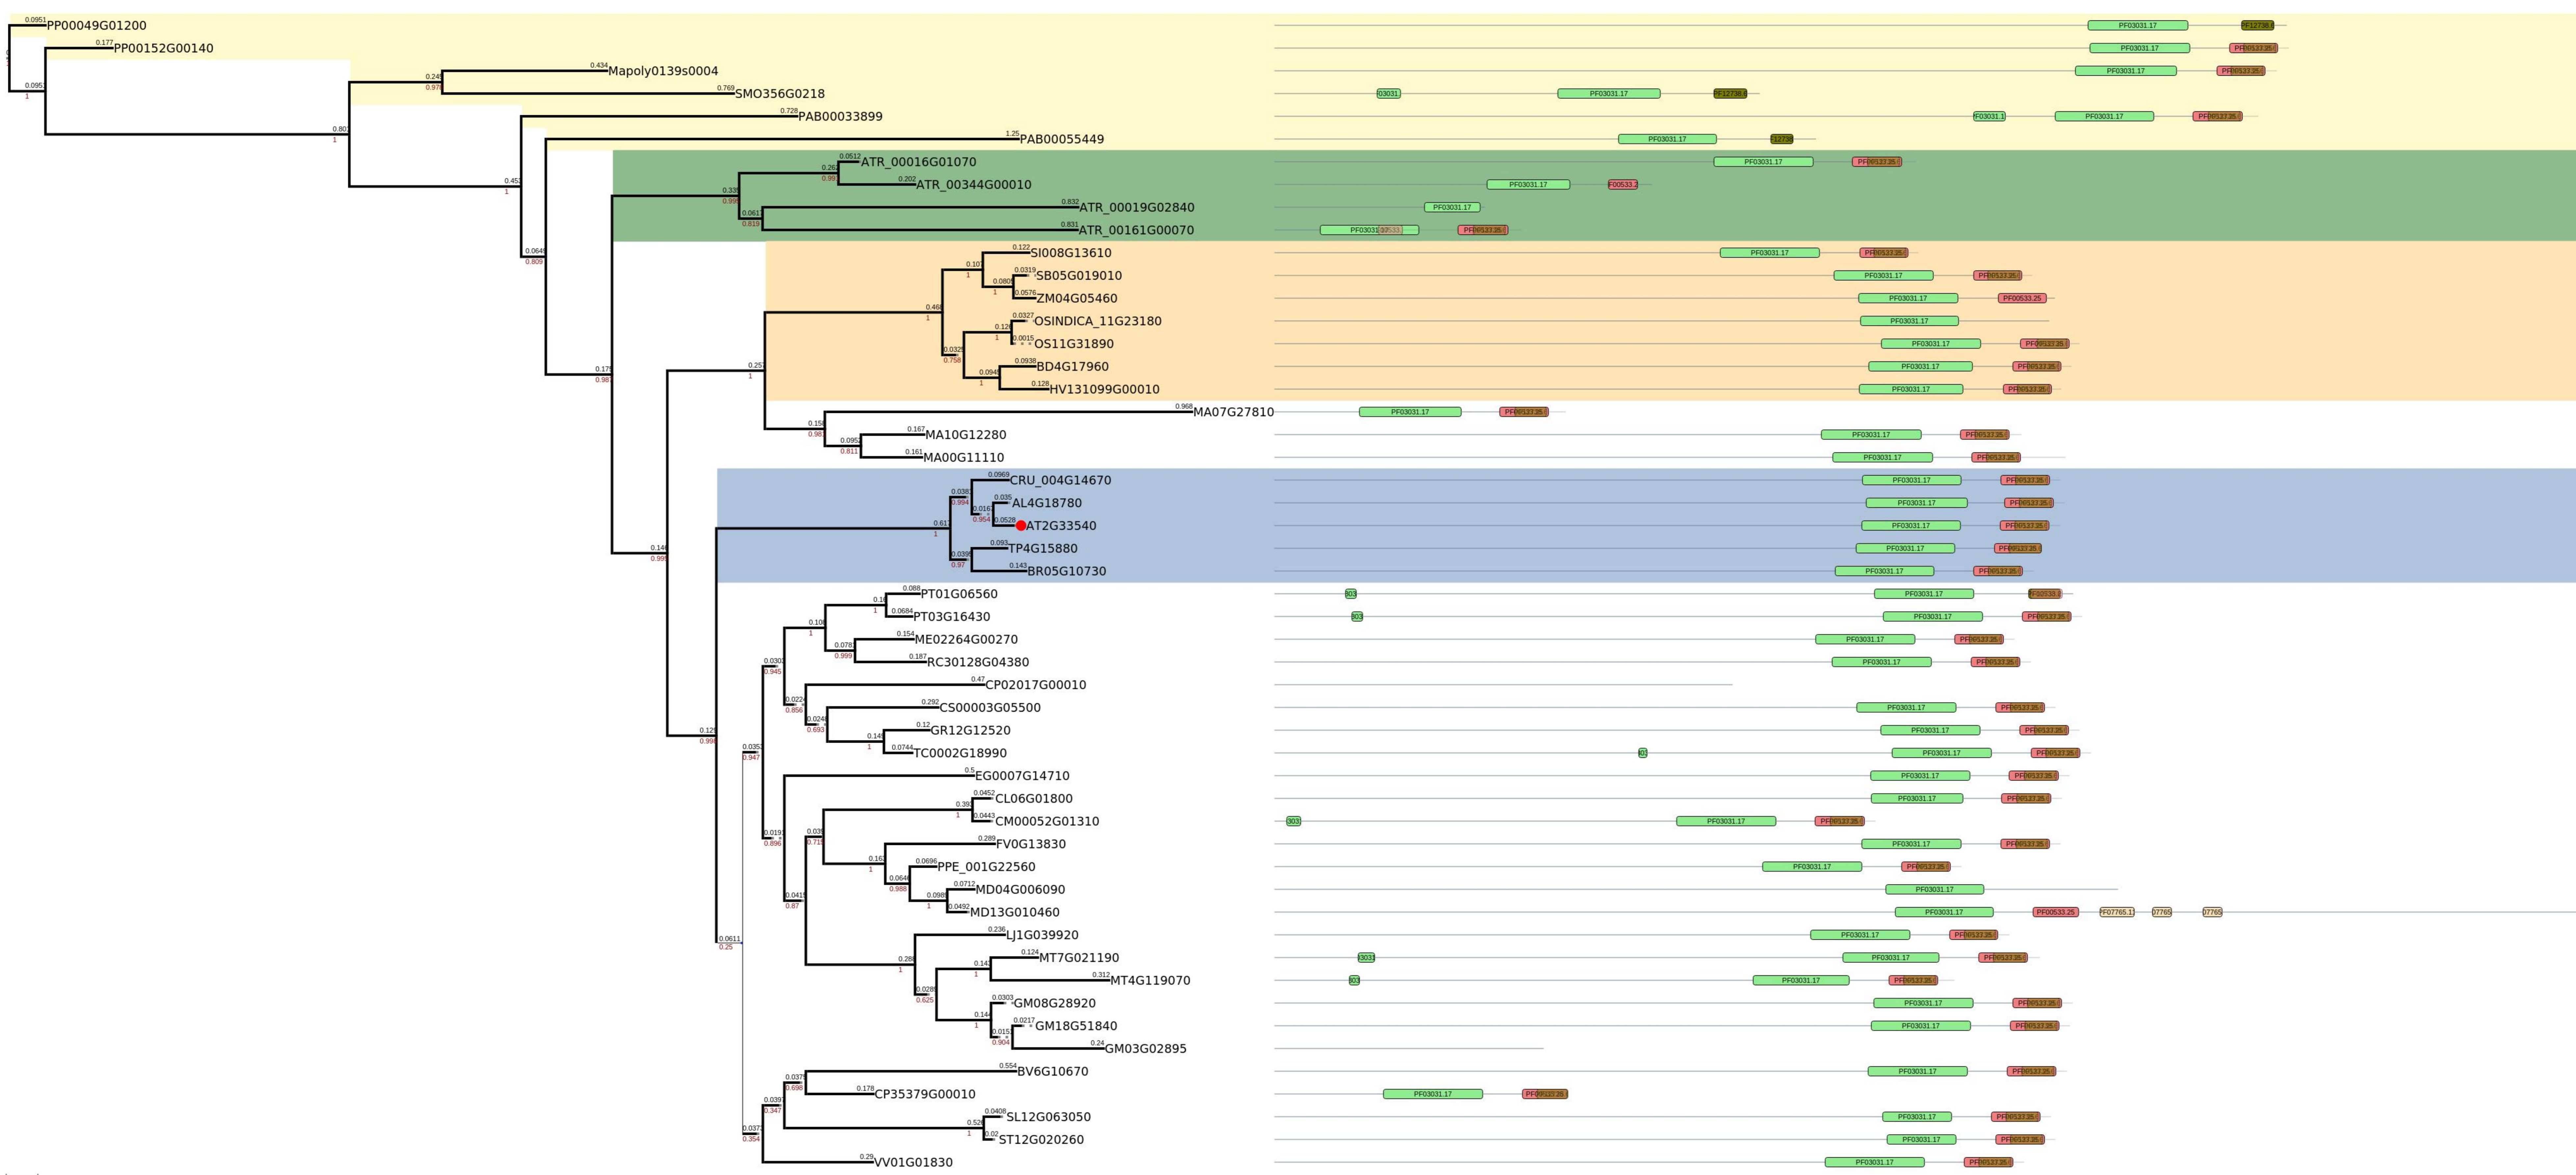

0.0833333

**taxonpmic identity of protein domain architecture**

|                             |                                                    |  |
|-----------------------------|----------------------------------------------------|--|
| <b>Poaceae</b>              | NLI_interacting_factor_like_phosphatase_PF03031_17 |  |
|                             | twin_BRCT_domain_PF12738_6                         |  |
| <b>Brassicales</b>          | BRCA1_C_Terminus_BRCT_domain_PF00533_25            |  |
|                             | KIP1_like_protein_PF07765_11                       |  |
| <b>Out group</b>            |                                                    |  |
| <b>Amborella trichopoda</b> |                                                    |  |



**Figure S31.** PhyML phylogenetic relations and composition of domains for AT2G35110 homologues of representative plant species.

The color legends of species and domains is given below

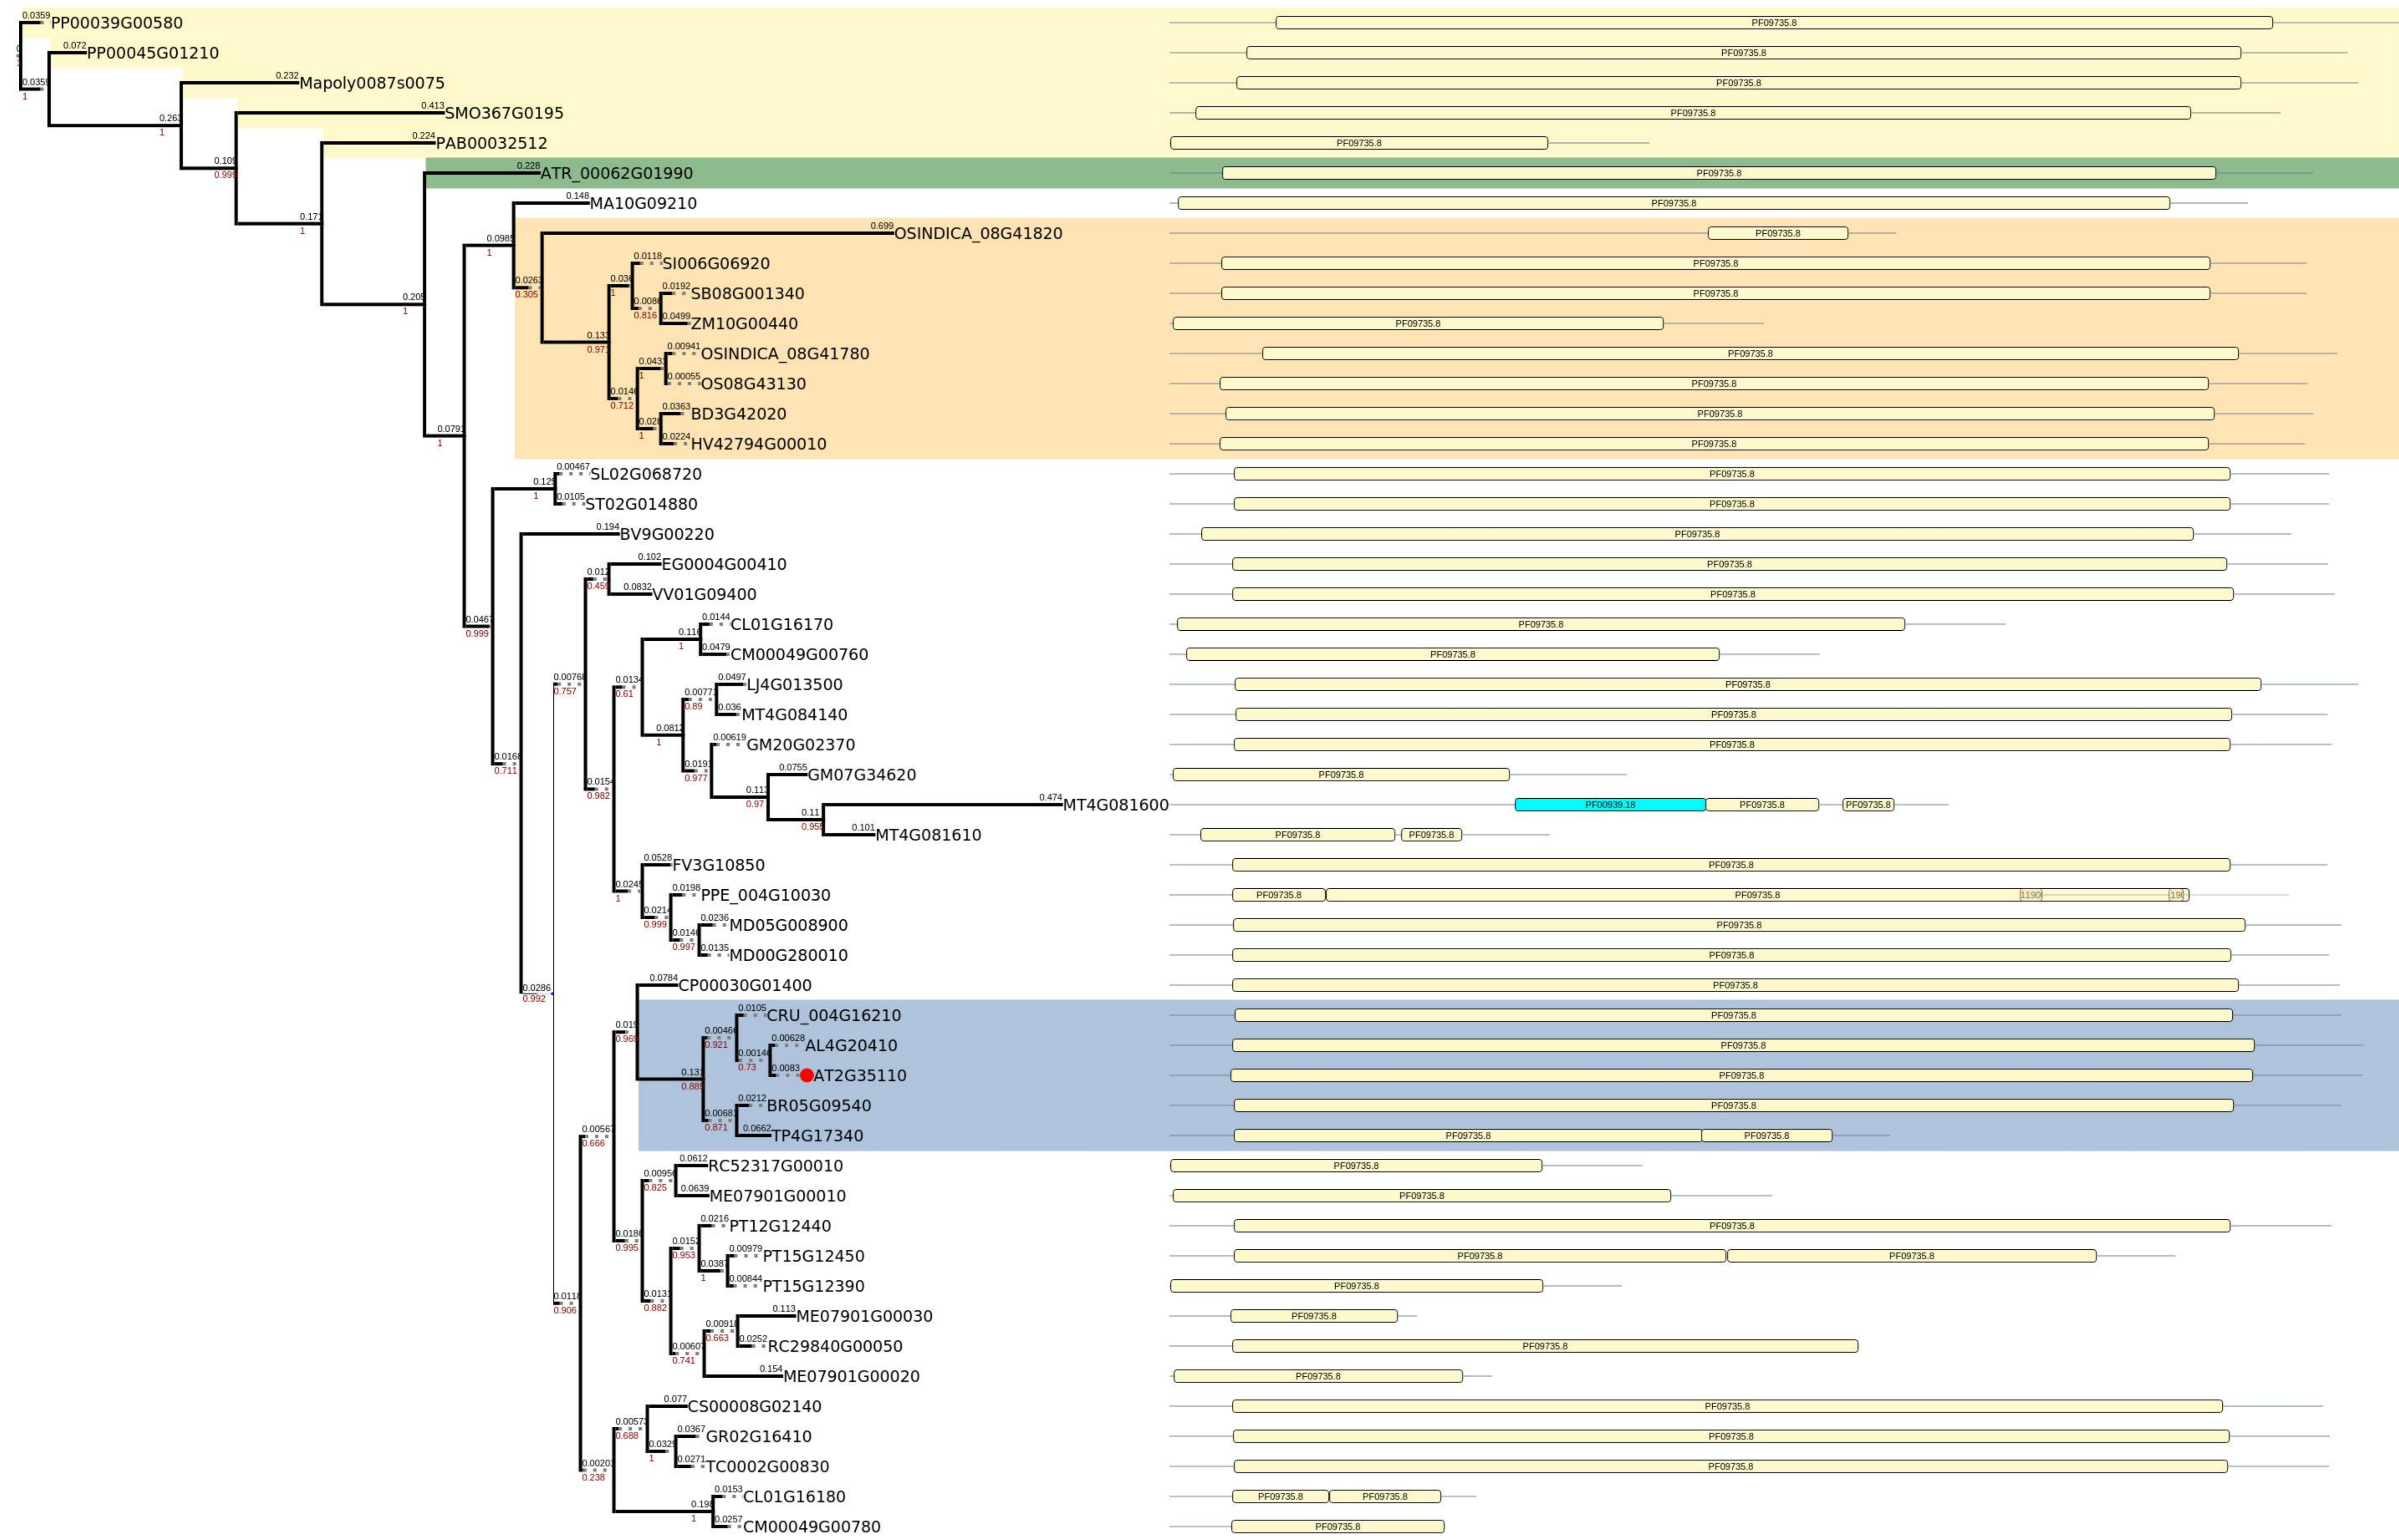

0.0833333

taxonpmic identity of protein domain architecture

|                             |                                                          |            |
|-----------------------------|----------------------------------------------------------|------------|
| <b>Poaceae</b>              | Membrane_associated_apoptosis_protein_PF09735_8          | PF09735.8  |
| <b>Brassicales</b>          | Sodium_sulfate_symporter_transmembrane_region_PF00939_18 | PF00939.18 |
| <b>Out group</b>            | Domain_of_unknown_function_DUF3420_PF11900_7             | PF11900.7  |
| <b>Amborella trichopoda</b> |                                                          |            |



**Figure S32.** PhyML phylogenetic relations and composition of domains for AT2G39940 homologues of representative plant species. The color legends of species and domains is given below

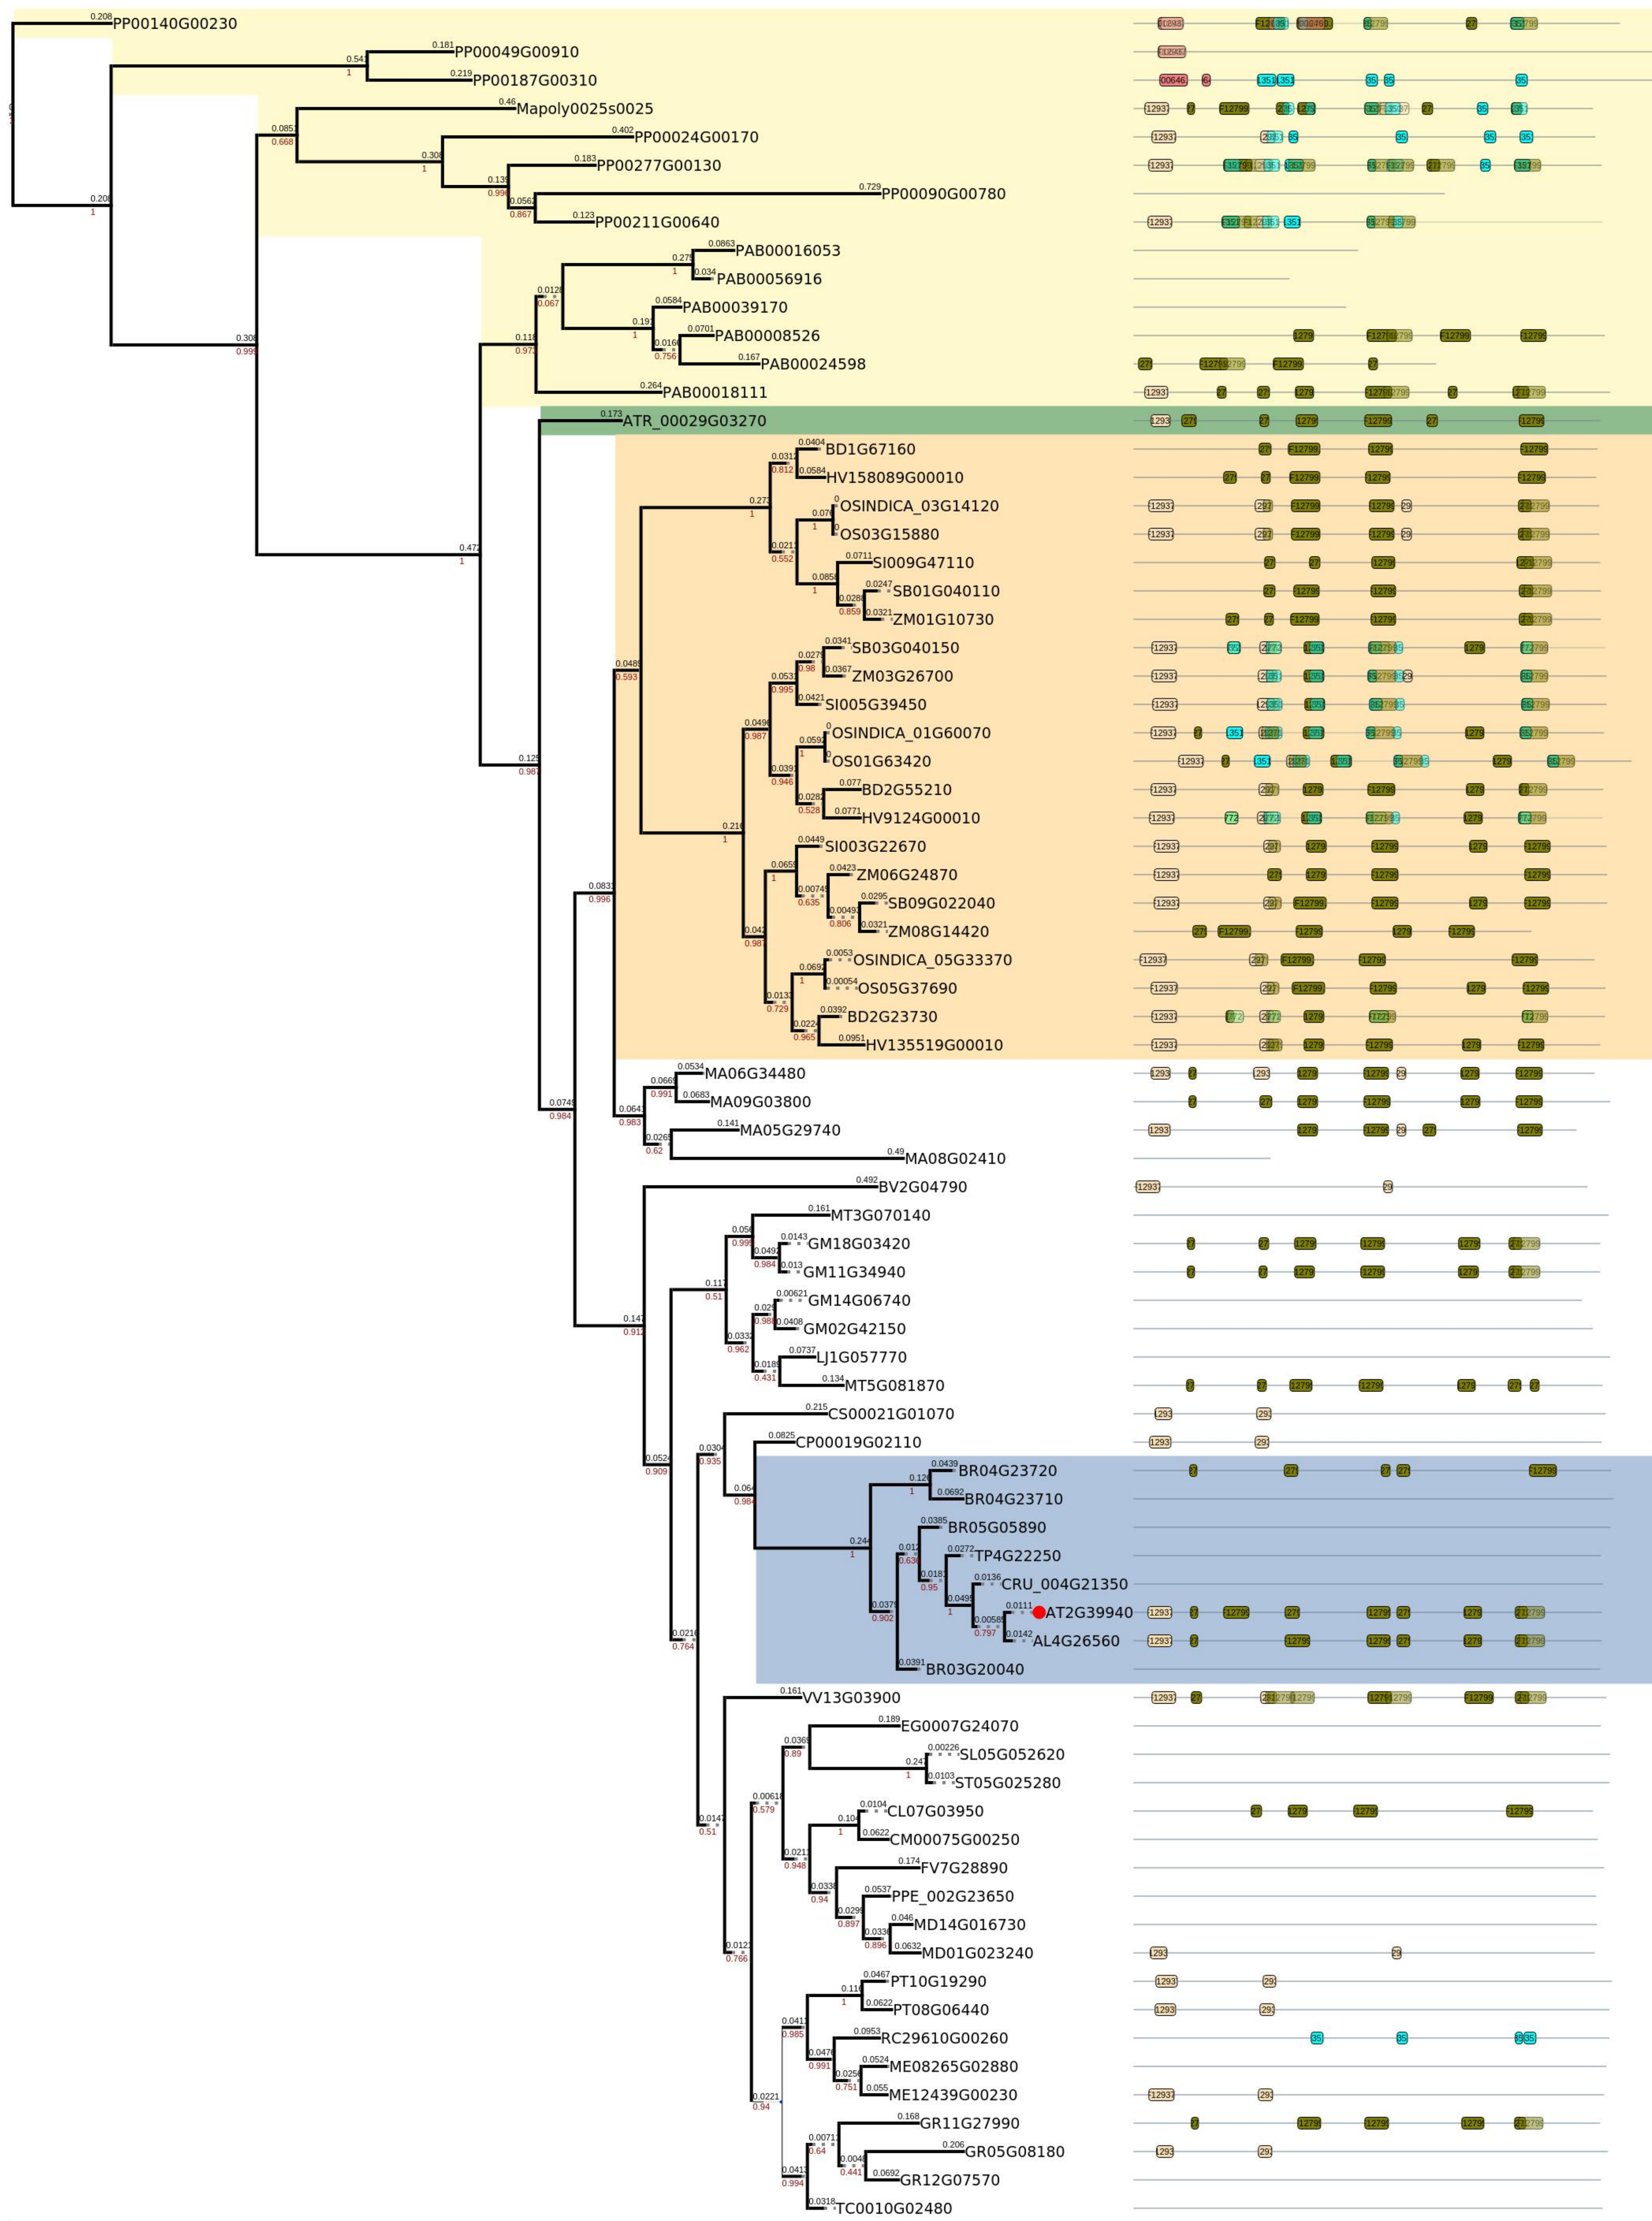

0.0833333  
**taxonpmic identity of protein domain architecture**

|                             |                                         |            |
|-----------------------------|-----------------------------------------|------------|
| <b>Poaceae</b>              | F_box_domain_PF00646_32                 | PF00646_32 |
|                             | F_box_like_PF12937_6                    | PF12937_6  |
| <b>Brassicales</b>          | Leucine_Rich_repeats_2_copies_PF12799_6 | PF12799_6  |
|                             | Leucine_Rich_repeat_PF13516_5           | PF13516_5  |
| <b>Out group</b>            | Leucine_Rich_Repeat_PF07723_12          | PF07723_12 |
| <b>Amborella trichopoda</b> |                                         |            |



**Figure S33.** PhyML phylogenetic relations and composition of domains for AT2G42260 homologues of representative plant species. The color legends of species and domains is given below

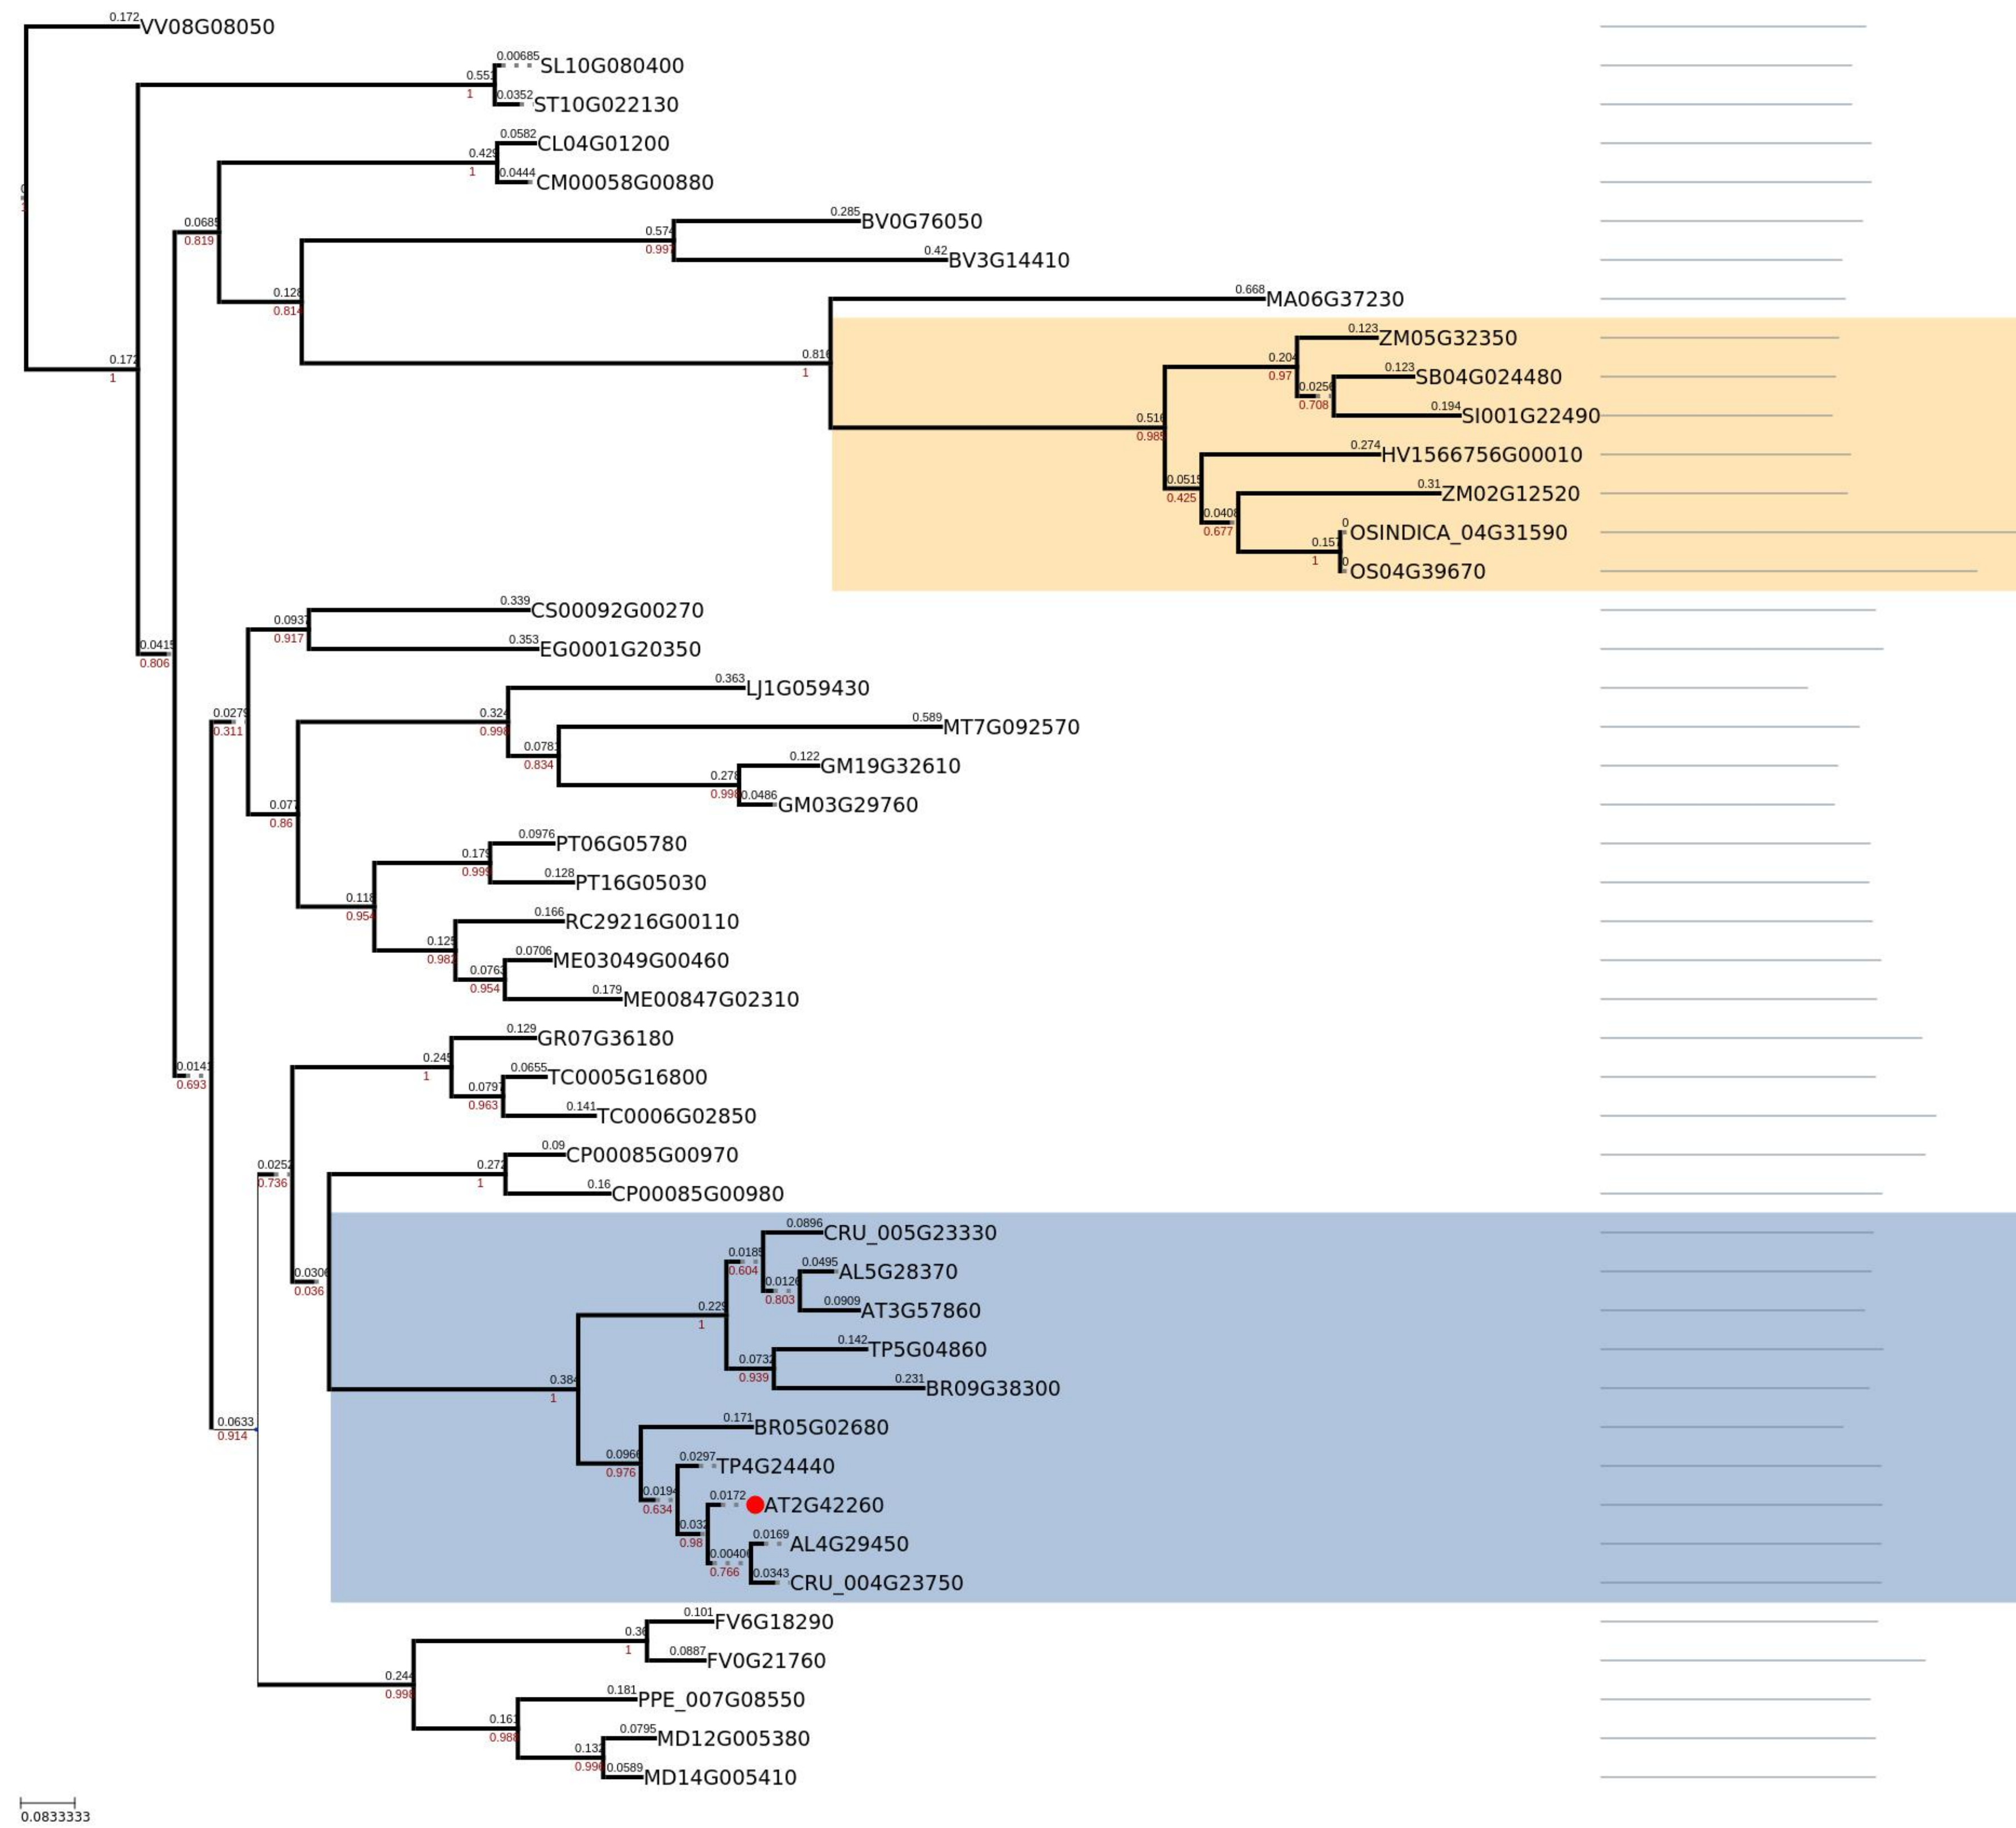

taxonpmc identity of protein    domain architecture

- Poaceae
- Brassicales
- Out group
- Amborella trichopoda



**Figure S34.** PhyML phylogenetic relations and composition of domains for AT2G46225, AT5G42030, AT5G24310 homologues of representative plant species. The color legends of species and domains is given below

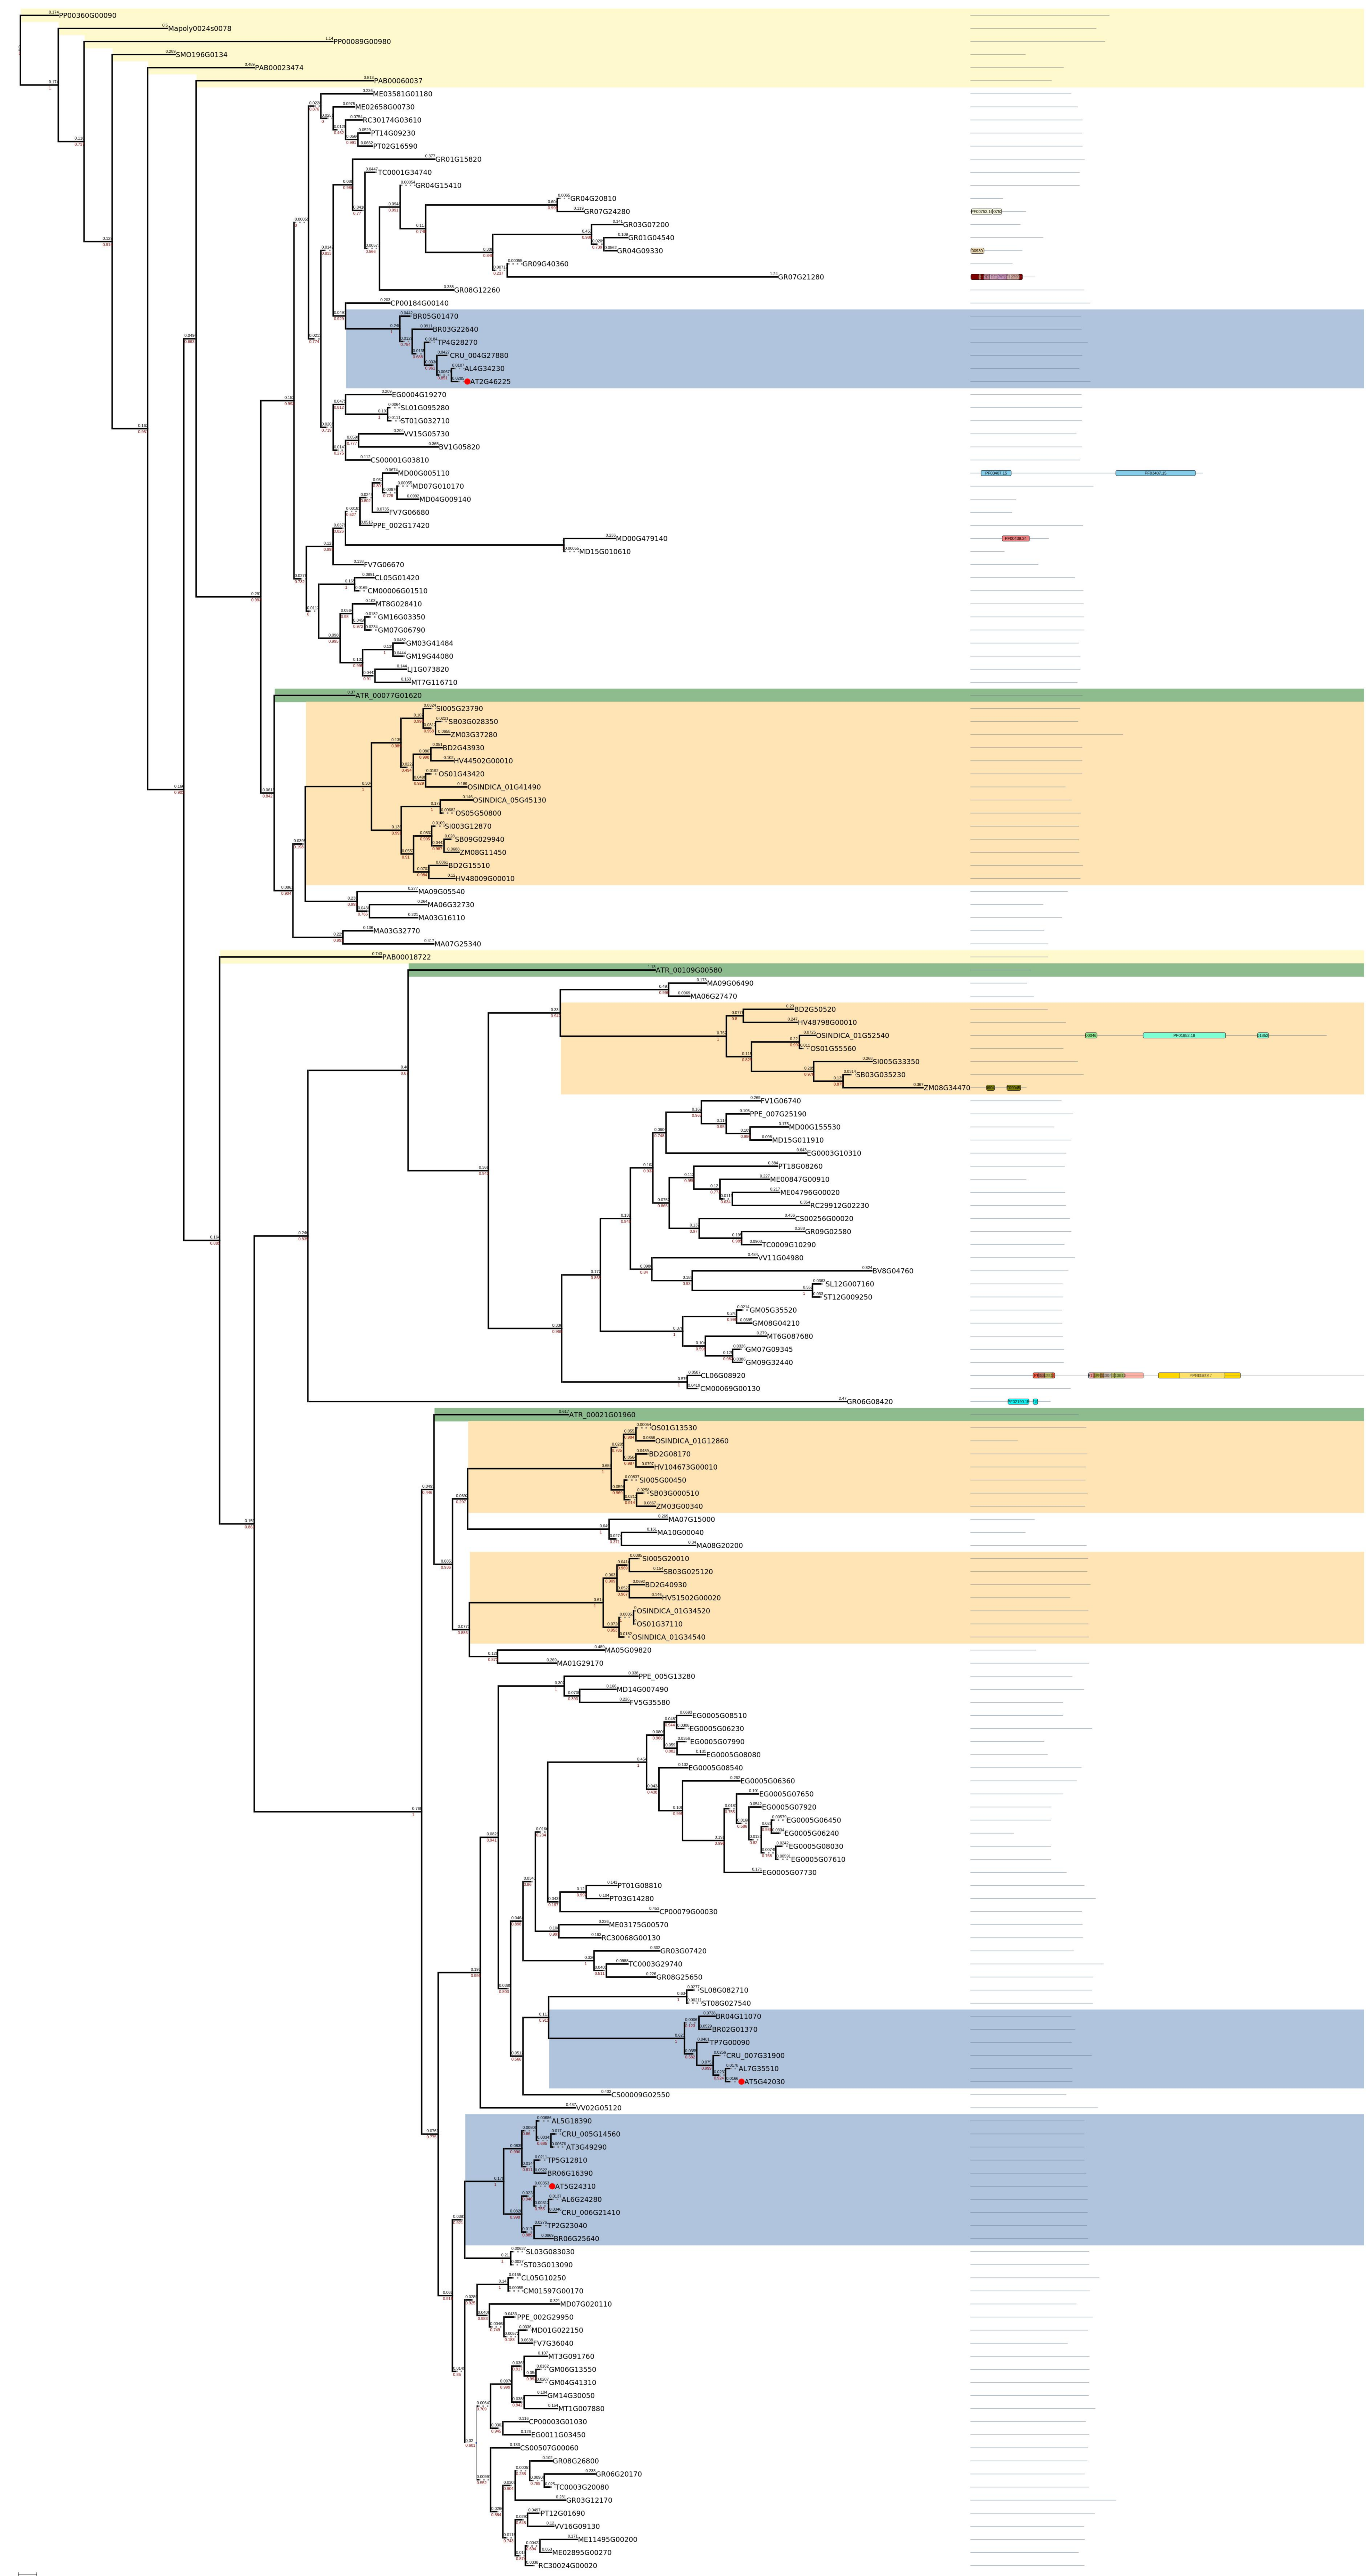

**taxonomic identity of protein**

- Poaceae XPG\_N\_terminal\_domain\_FF00752\_16
- Brassicales Dipeptidyl\_peptidase\_IV\_DPP\_IV\_N\_terminal\_region\_FF00930\_20
- Out group Leucine\_Rich\_repeats\_2\_copies\_FF12799\_6
- Amborella trichopoda Leucine\_rich\_repeat\_FF13855\_5
- Nucleotide\_diphospho\_sugar\_transferase\_FF03407\_15
- Bromodomain\_FF00439\_24
- Homeobox\_domain\_FF00046\_28

**domain architecture**

- START START\_domain\_FF01852\_18
- L27\_2 L27\_2\_FF09045\_9
- PPR PPR\_repeat\_FF01535\_19
- PPR PPR\_repeat\_family\_FF13041\_5
- Pentatricopeptide Pentatricopeptide\_repeat\_domain\_FF13812\_5
- Pentatricopeptide Pentatricopeptide\_repeat\_region\_of\_PRORP\_FF17177\_3
- Protein Protein\_only\_RNase\_P\_FF16953\_4
- Zc3h12a Zc3h12a\_like\_Ribonuclease\_NYN\_domain\_FF11977\_7

- ATP ATP\_dependent\_protease\_La\_LON\_substrate\_binding\_domain\_FF02190\_15
- START
- PPR
- Pentatricopeptide
- Pentatricopeptide
- Protein
- Zc3h12a
- START
