# Supplementary material for: The evolution of gene regulatory networks controlling Arabidopsis thaliana L. trichome development
Source: PubMed Central journal article supplement (PMC6393967; doi:10.1186/s12870-019-1640-2), 2019-02-15
Supplement: 12870_2019_1640_MOESM10_ESM.pdf [file 12870_2019_1640_MOESM10_ESM.pdf]

Figure S35. PhyML phylogenetic relations and composition of domains for AT2G46600 homologues of representative plant species. The color legends of species and domains is given below

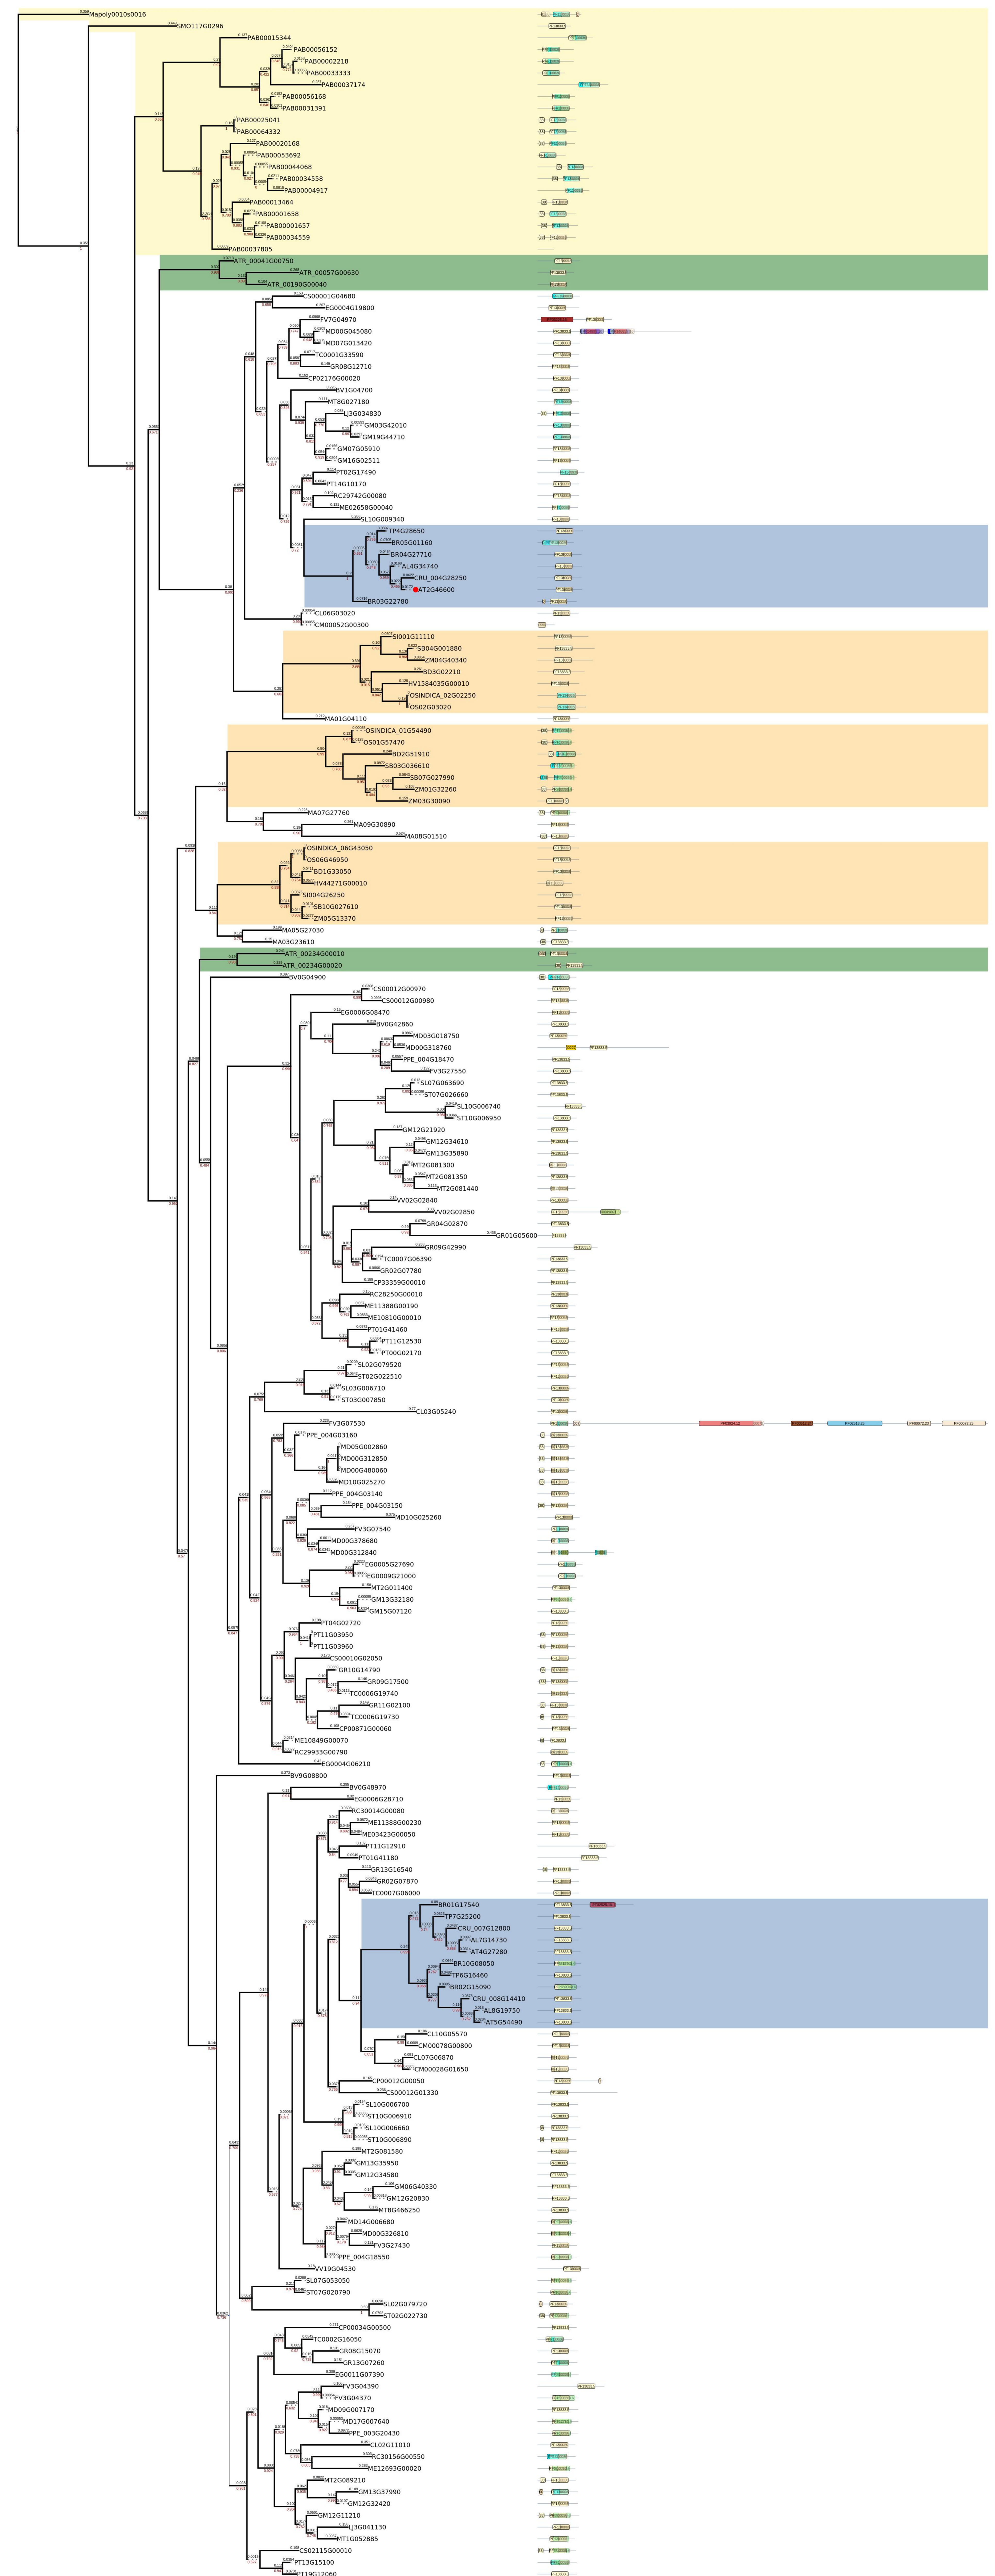

0.000333

taxonomic identity of protein

- Poaceae EF\_hand\_FF00036\_31
- Brassicales EF\_hand\_domain\_pair\_FF13499\_5
- Out group EF\_hand\_domain\_pair\_FF13833\_5
- Amborella trichopoda Cytoskeletal\_regulatory\_complex\_EF\_hand\_FF12763\_6
- Yippee\_zinc\_binding\_DNA\_binding\_Mis18\_centromere\_assembly\_FF03226\_13
- Nup53\_35\_40\_type\_RNA\_recognition\_motif\_FF14605\_5
- RNA\_recognition\_motif\_FF08675\_10
- RNA\_recognition\_motif\_a\_k\_a\_RRM\_RBD\_or\_RNP\_domain\_FF00076\_21

domain architecture

- PF00088 RNA\_recognition\_motif\_FF08777\_10
- PF00088 RNA\_recognition\_motif\_a\_k\_a\_RRM\_RBD\_or\_RNP\_domain\_FF13893\_5
- PF00088 Histone\_lysine\_methyltransferase\_SET\_associated\_FF11767\_7
- PF00088 Proteasome\_subunit\_FF00227\_25
- PF00088 Myb\_like\_DNA\_binding\_domain\_FF0249\_30
- PF00088 Myb\_like\_DNA\_binding\_domain\_FF13921\_5
- PF00088 CHASE\_domain\_FF03924\_12
- PF00088 Histidine\_kinase\_DNA\_gyrase\_B\_and\_HSP90\_like\_ATPase\_FF02518\_25

- PF00088 His\_Kinase\_A\_phospho\_acceptor\_domain\_FF00512\_24
- PF00088 Response\_regulator\_receiver\_domain\_FF00072\_23
- PF00088 EF\_hand\_FF13202\_5
- PF00088 Flavodoxin\_like\_fold\_FF02525\_16
- PF00088 NADPH\_dependent\_FMN\_reductase\_FF03358\_14



**Figure S36.** PhyML phylogenetic relations and composition of domains for AT3G12280 homologues of representative plant species.  
The color legends of species and domains is given below

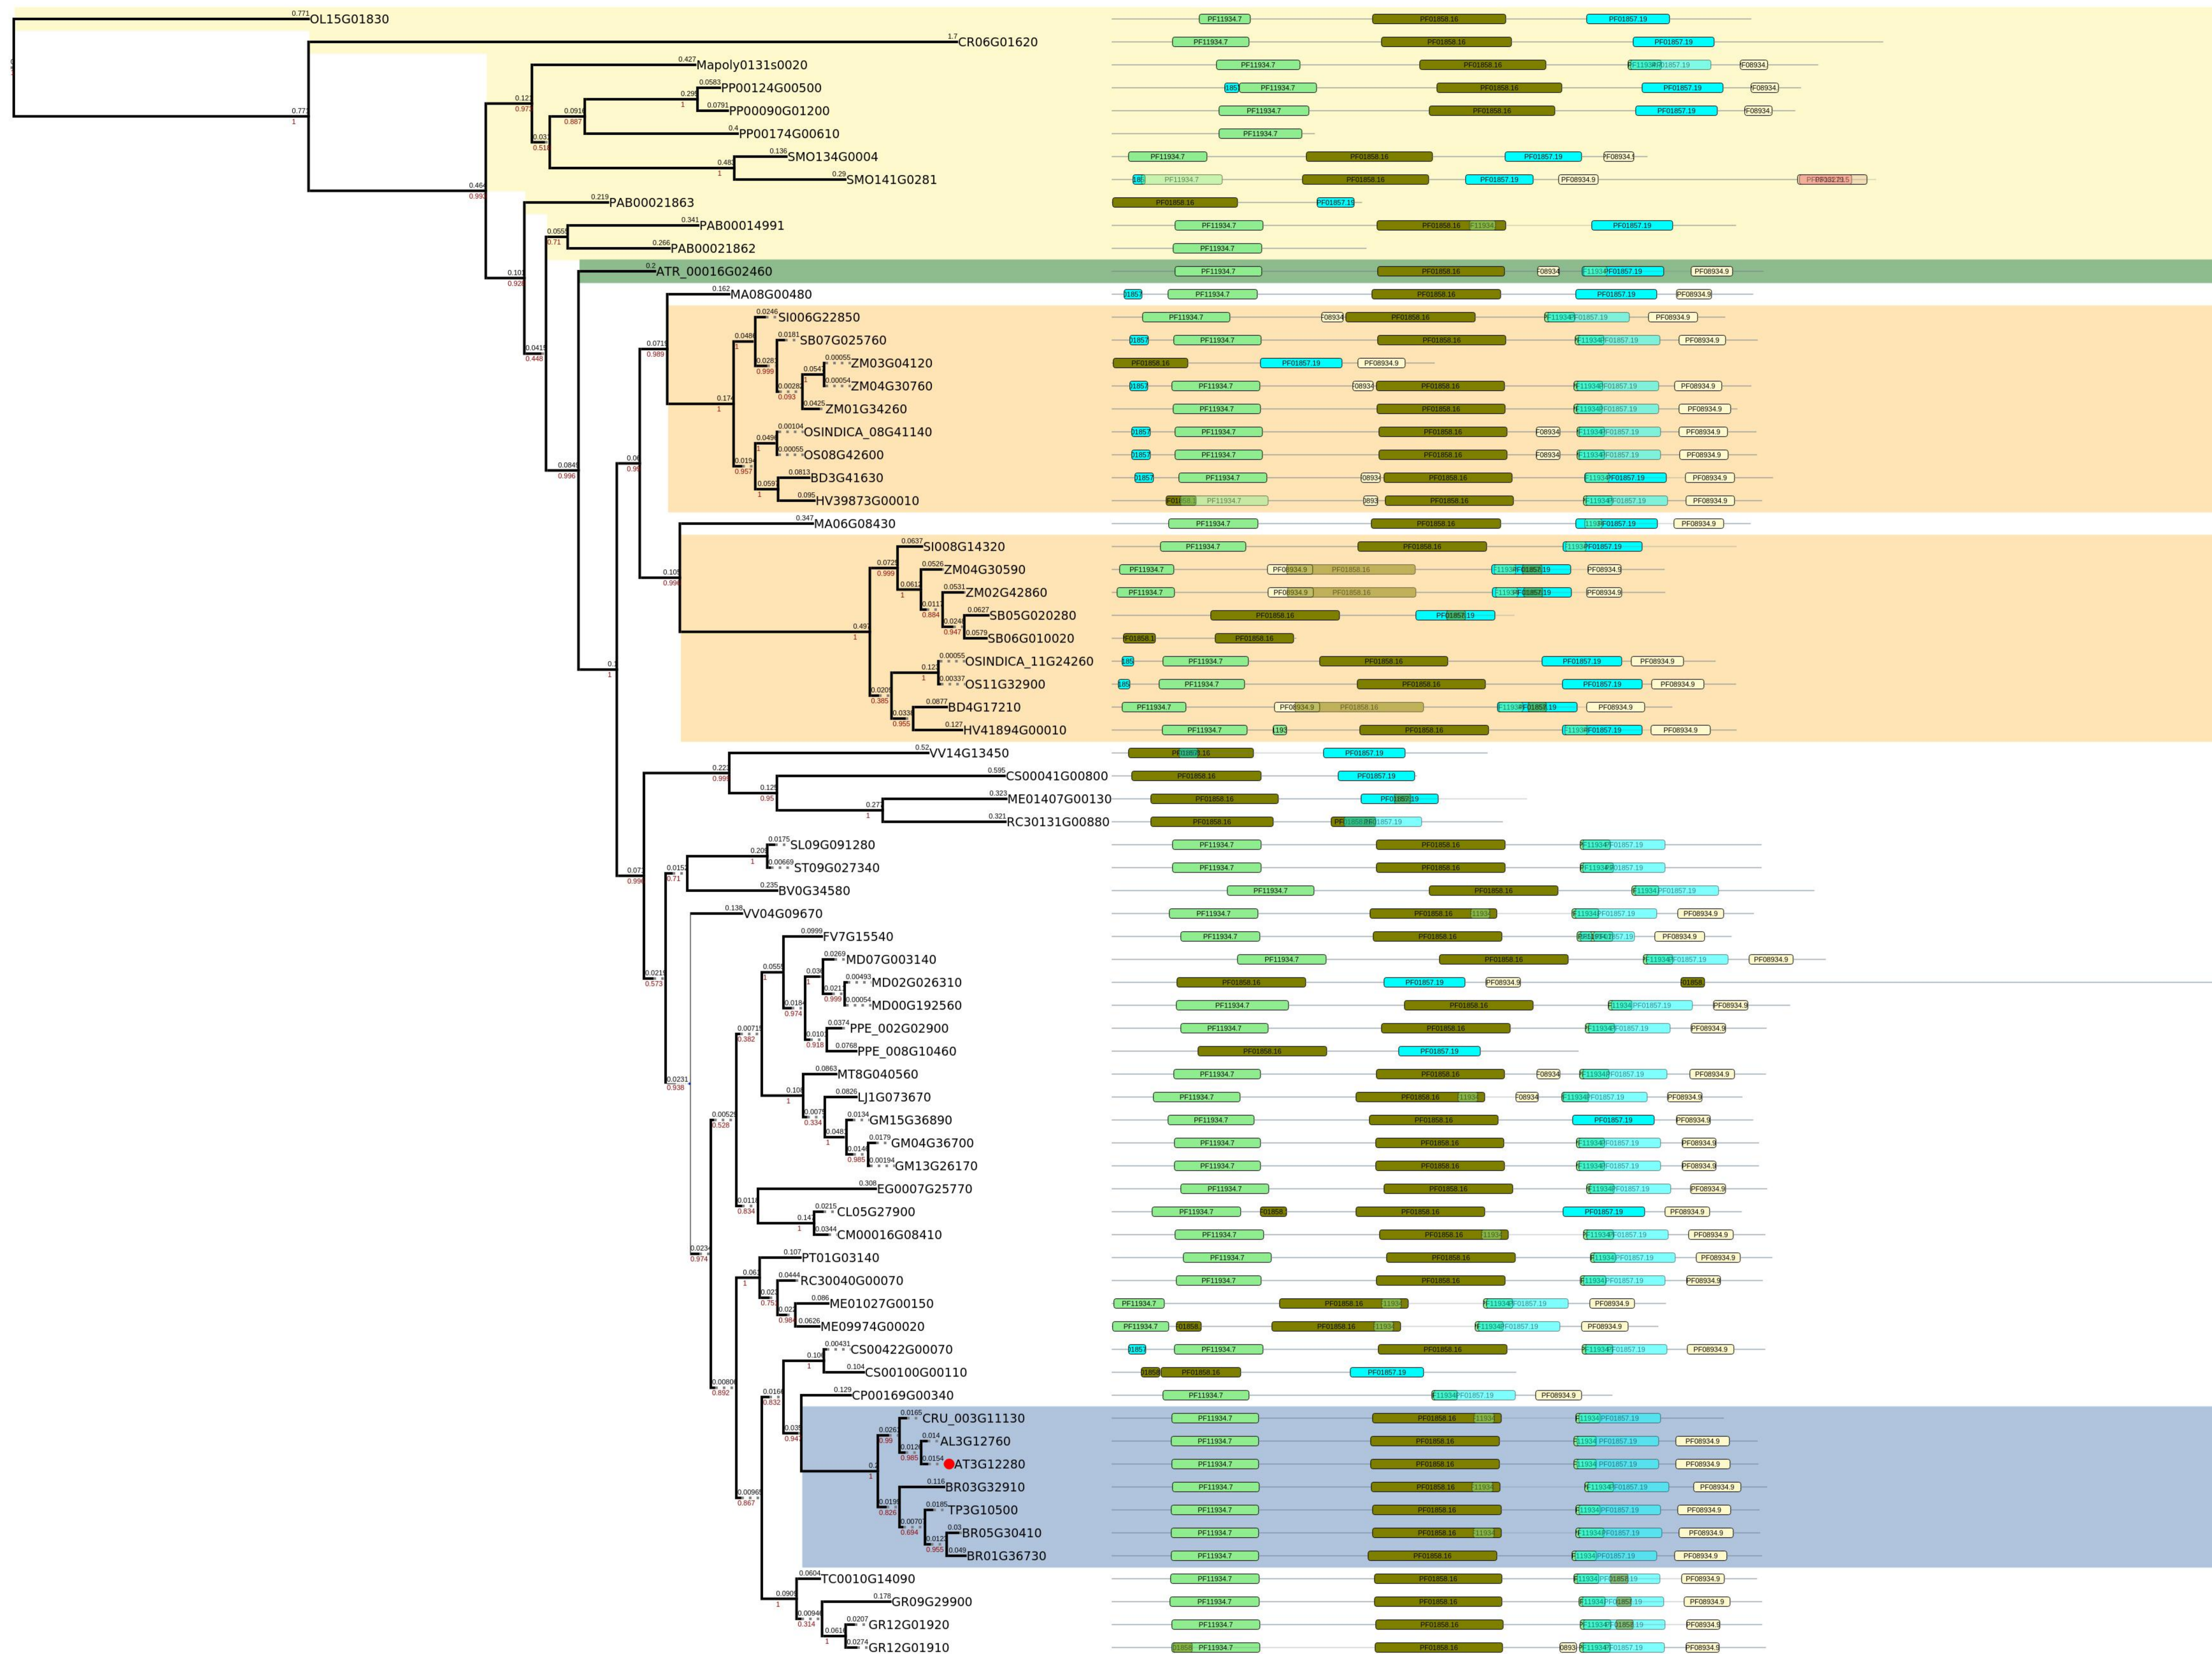

0.0833333

**taxonpmic identity of protein domain architecture**

|                             |                                                       |            |
|-----------------------------|-------------------------------------------------------|------------|
| <b>Poaceae</b>              | Domain_of_unknown_function_DUF3452_Pf11934_7          | PF11934.7  |
| <b>Brassicales</b>          | Retinoblastoma_associated_protein_A_domain_Pf01858_16 | PF01858.16 |
|                             | Retinoblastoma_associated_protein_B_domain_Pf01857_19 | PF01857.19 |
|                             | Rb_C_terminal_domain_Pf08934_9                        | PF08934.9  |
| <b>Out group</b>            | Thioesterase_superfamily_Pf03061_21                   | PF03061.21 |
|                             | Thioesterase_like_superfamily_Pf13279_5               | PF13279.5  |
| <b>Amborella trichopoda</b> |                                                       |            |



**Figure S37.** PhyML phylogenetic relations and composition of domains for AT3G12400 homologues of representative plant species. The color legends of species and domains is given below

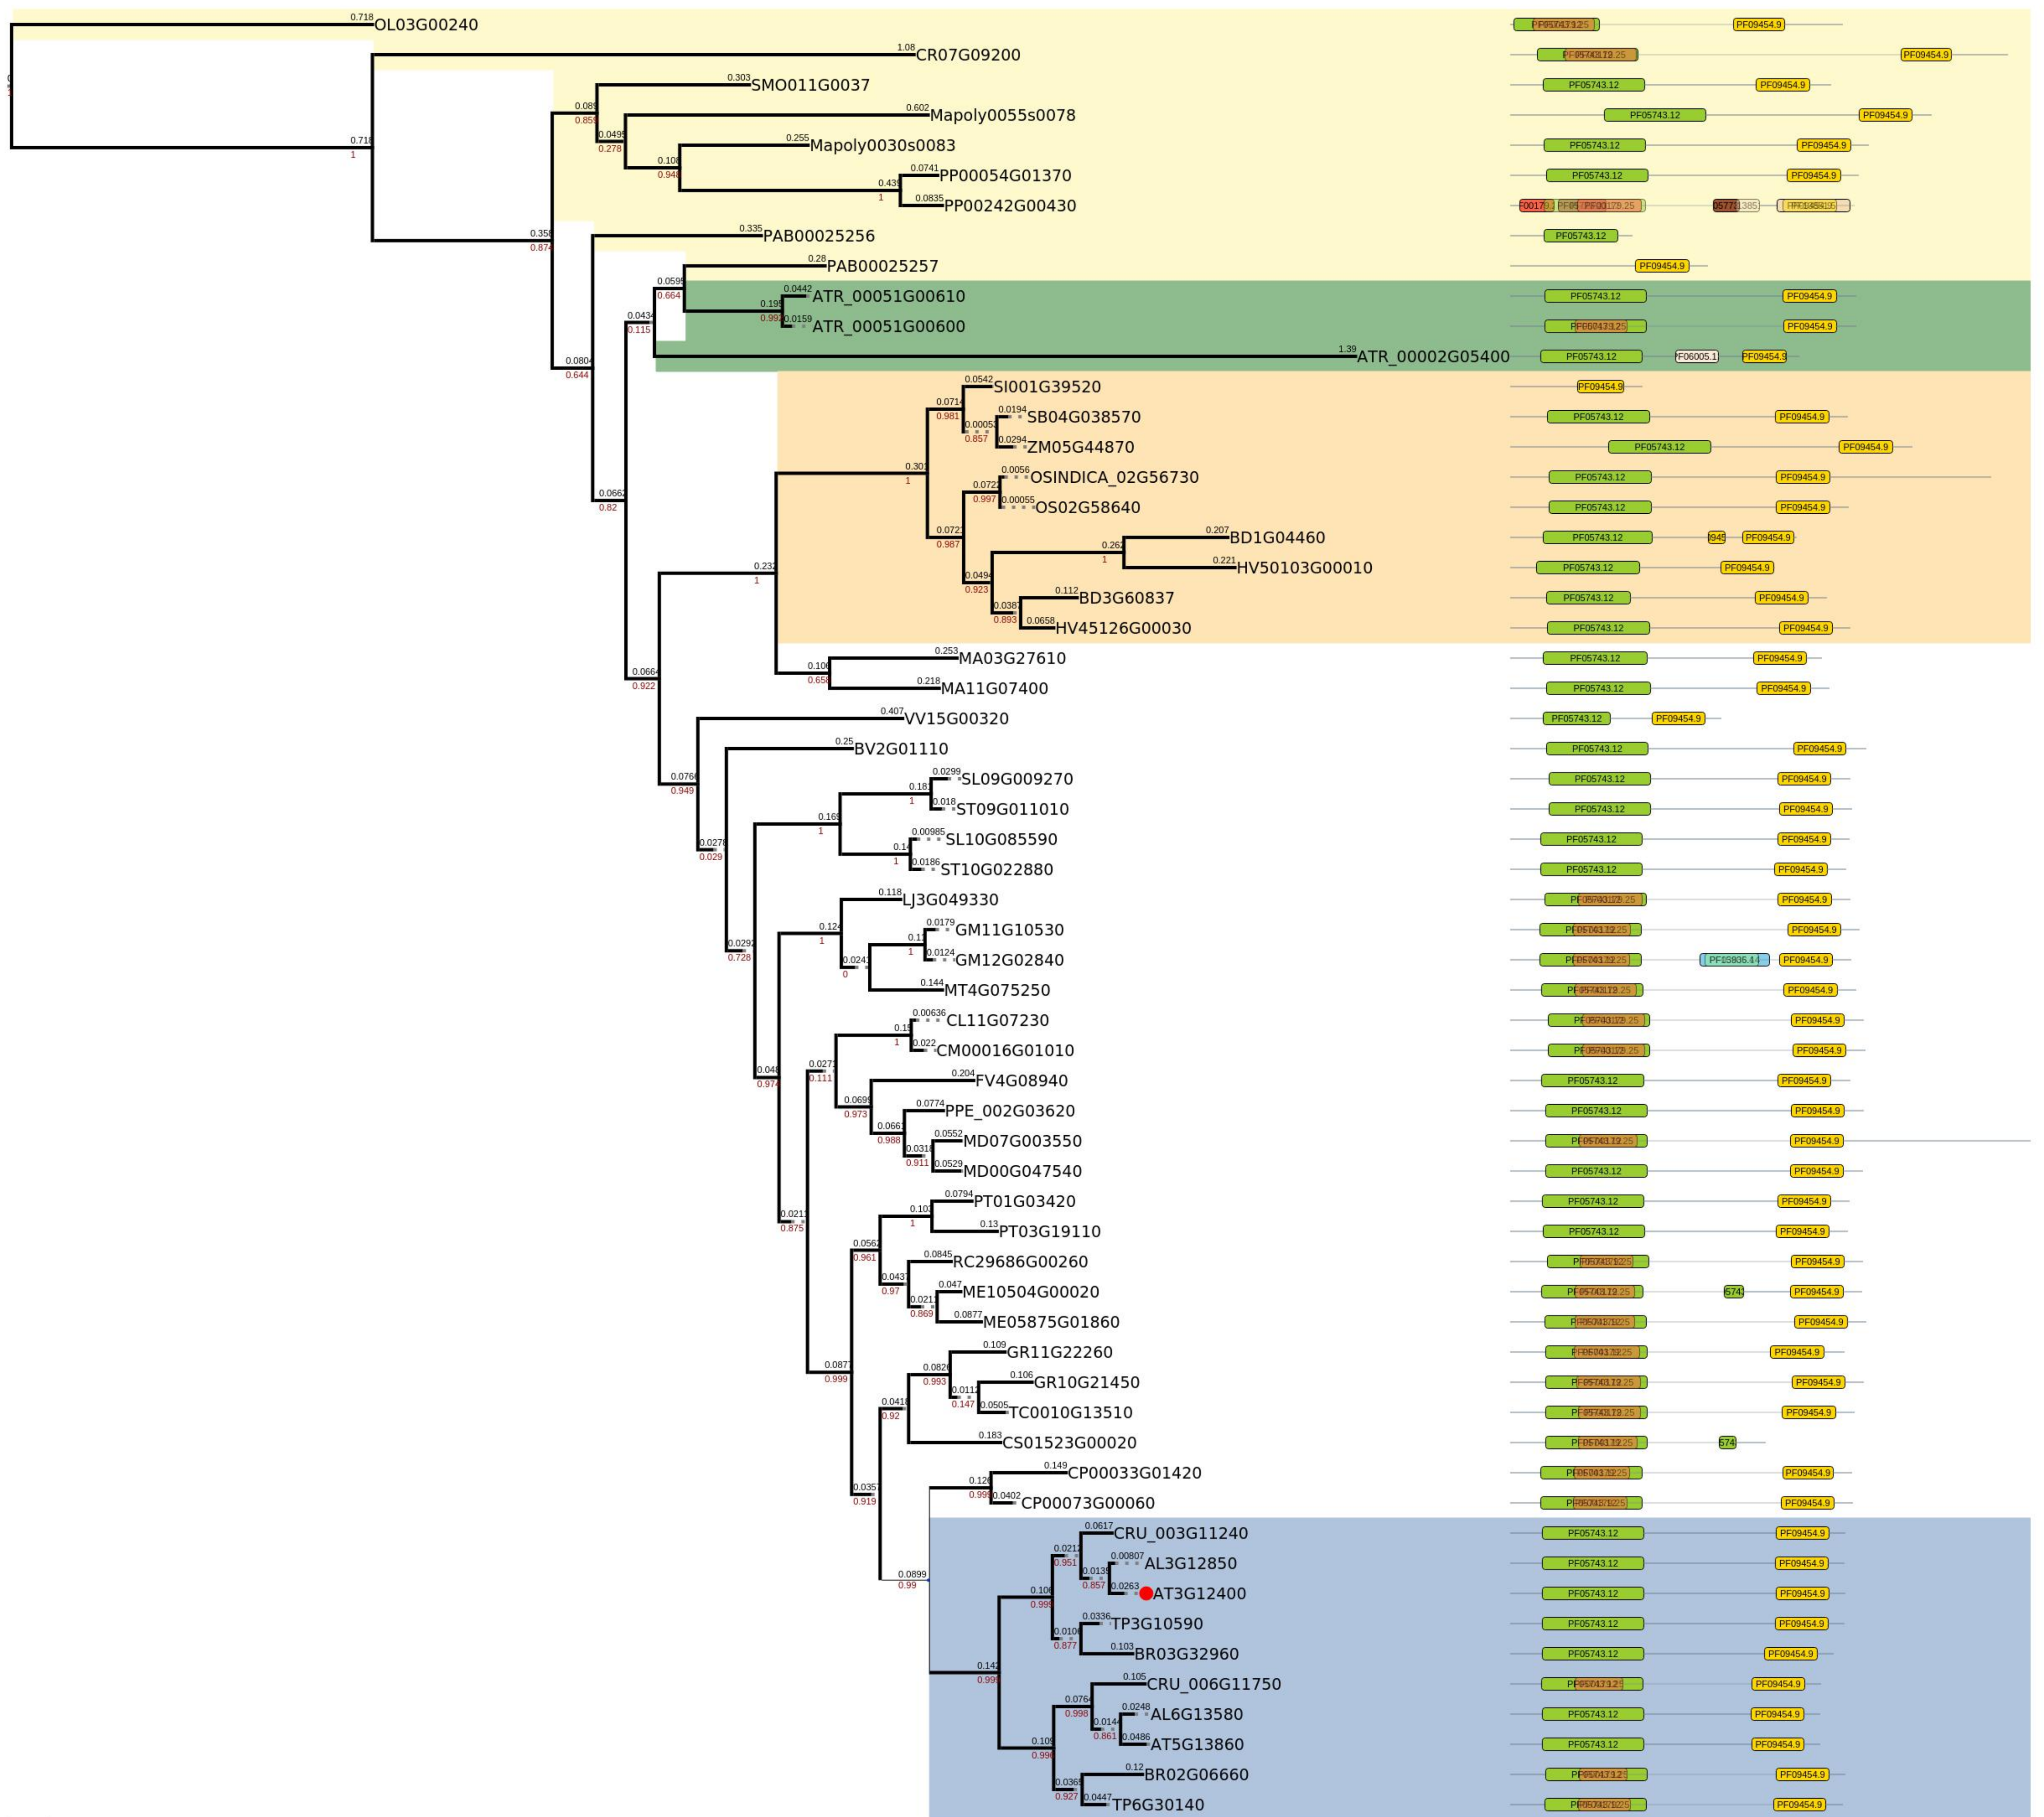

taxonomic identity of protein domain architecture

| Species Group        | Protein Domain                                   | Domain ID  |
|----------------------|--------------------------------------------------|------------|
| Poaceae              | UEV_domain                                       | PF05743.12 |
| Poaceae              | Ubiquitin_conjugating_enzyme                     | PF00179.25 |
| Brassicales          | Vps23_core_domain                                | PF09454.9  |
| Brassicales          | Growth_arrest_specific_micro_tubule_binding      | PF13851.5  |
| Out group            | RWD_domain                                       | PF05773.21 |
| Amborella trichopoda | Cell_division_protein_ZapB                       | PF06005.11 |
| Amborella trichopoda | Hyaluronan_mediated_motility_receptor_N_terminal | PF15905.4  |
| Amborella trichopoda | RasGAP_C_terminus                                | PF03836.14 |



**Figure S38.** PhyML phylogenetic relations and composition of domains of AT3G16630 homologues of representative plant species. The color legends of species and domains is given below

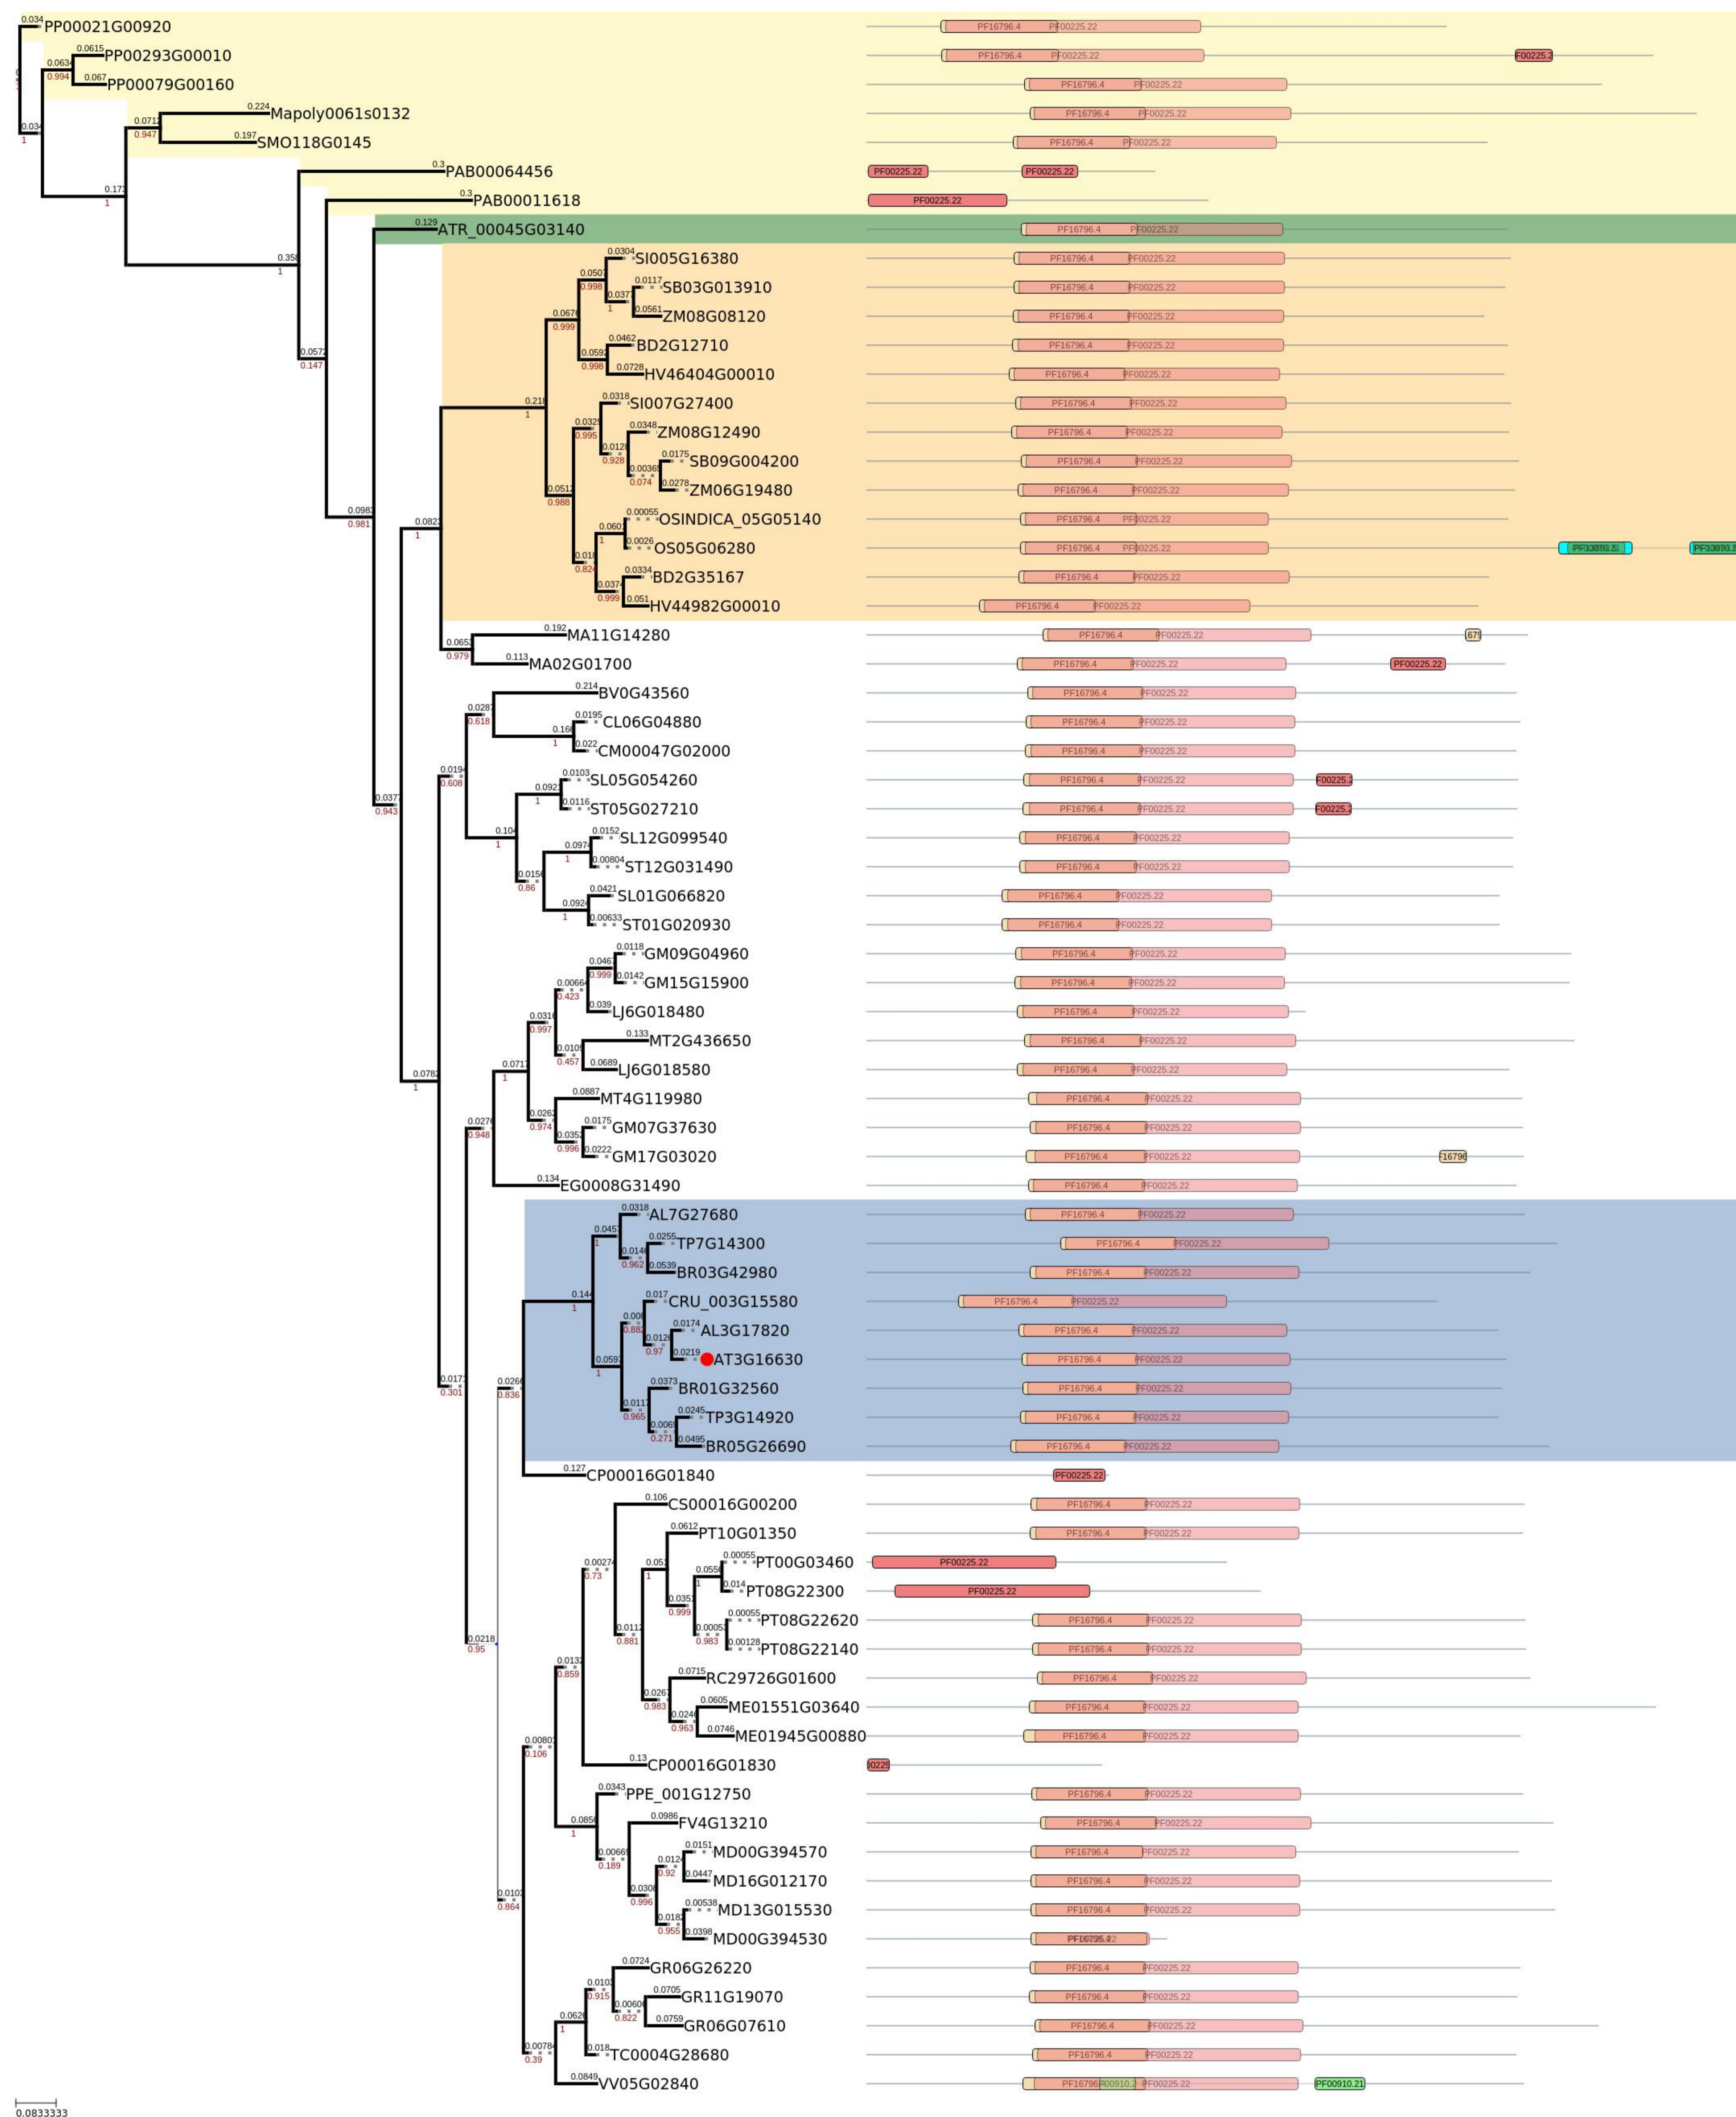

taxonpmic identity of protein domain architecture

| Species Group        | Domain Architecture                                              |
|----------------------|------------------------------------------------------------------|
| Poaceae              | Kinesin_motor_domain_PF00225_22<br>Microtubule_binding_PF16796_4 |
| Brassicales          | RNA_recognition_motif_a_k_a_RRM_RBD_or_RNP_domain_PF00076_21     |
| Out group            | RNA_recognition_motif_a_k_a_RRM_RBD_or_RNP_domain_PF13893_5      |
| Amborella trichopoda | RNA_helicase_PF00910_21                                          |

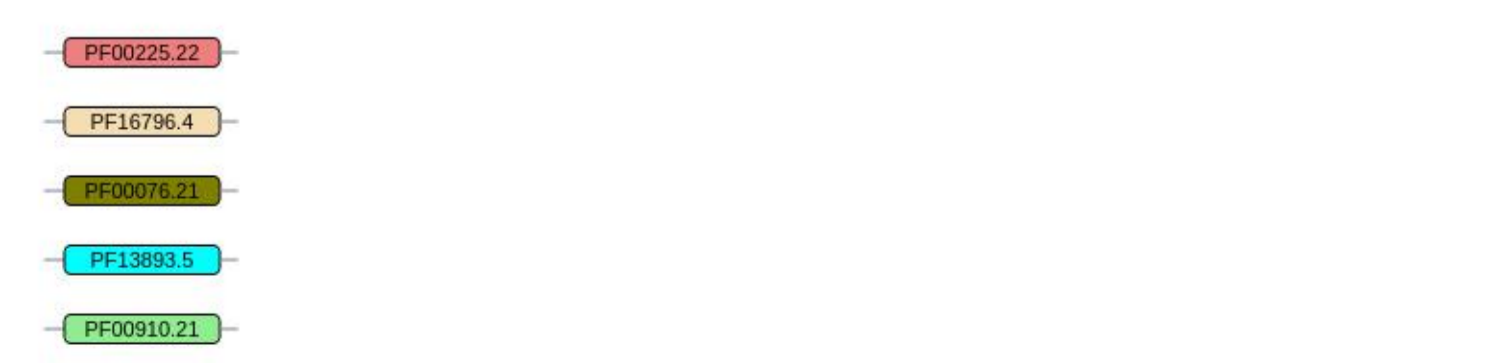



**Figure S39.** PhyML phylogenetic relations and composition of domains for AT3G27000 homologues of representative plant species. The color legends of species and domains is given below

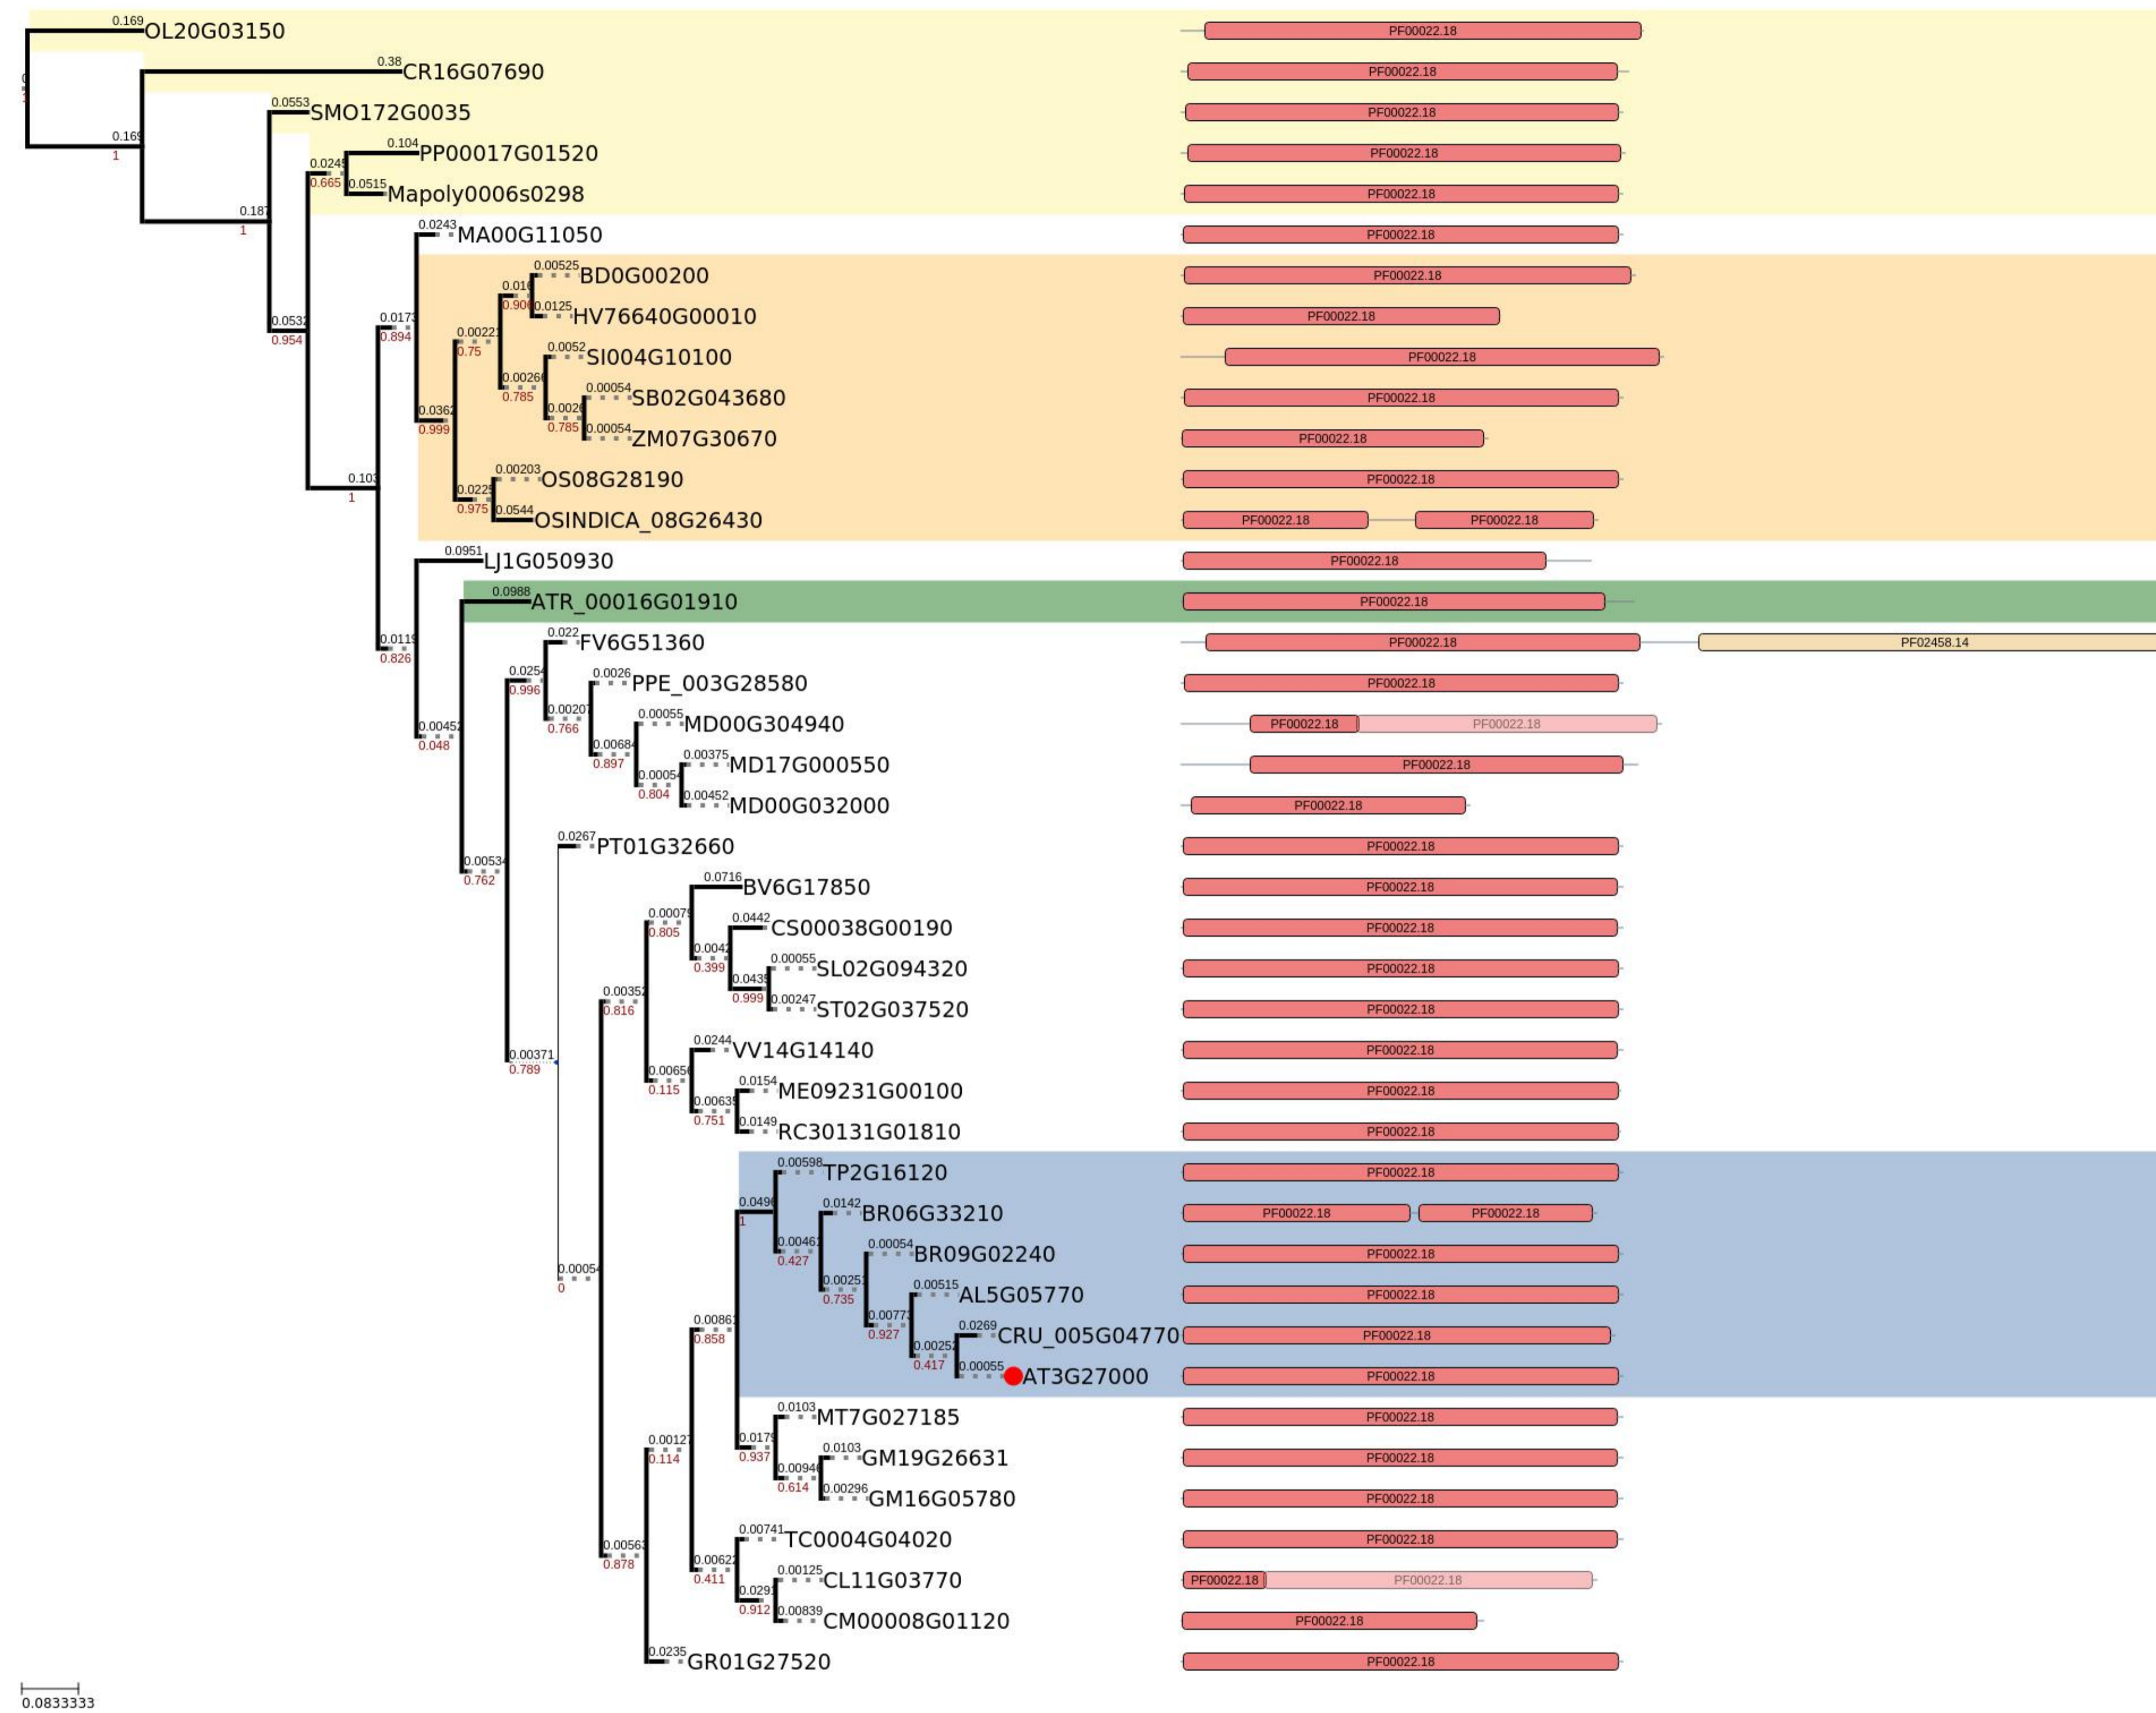

0.0833333

taxonpmic identity of protein domain architecture

- Poaceae
- Brassicales
- Out group
- Amborella trichopoda

- Actin\_PF00022\_18
- Transferase\_family\_PF02458\_14



**Figure S40.** PhyML phylogenetic relations and composition of domains for AT3G50530 homologues of representative plant species. The color legends of species and domains is given below

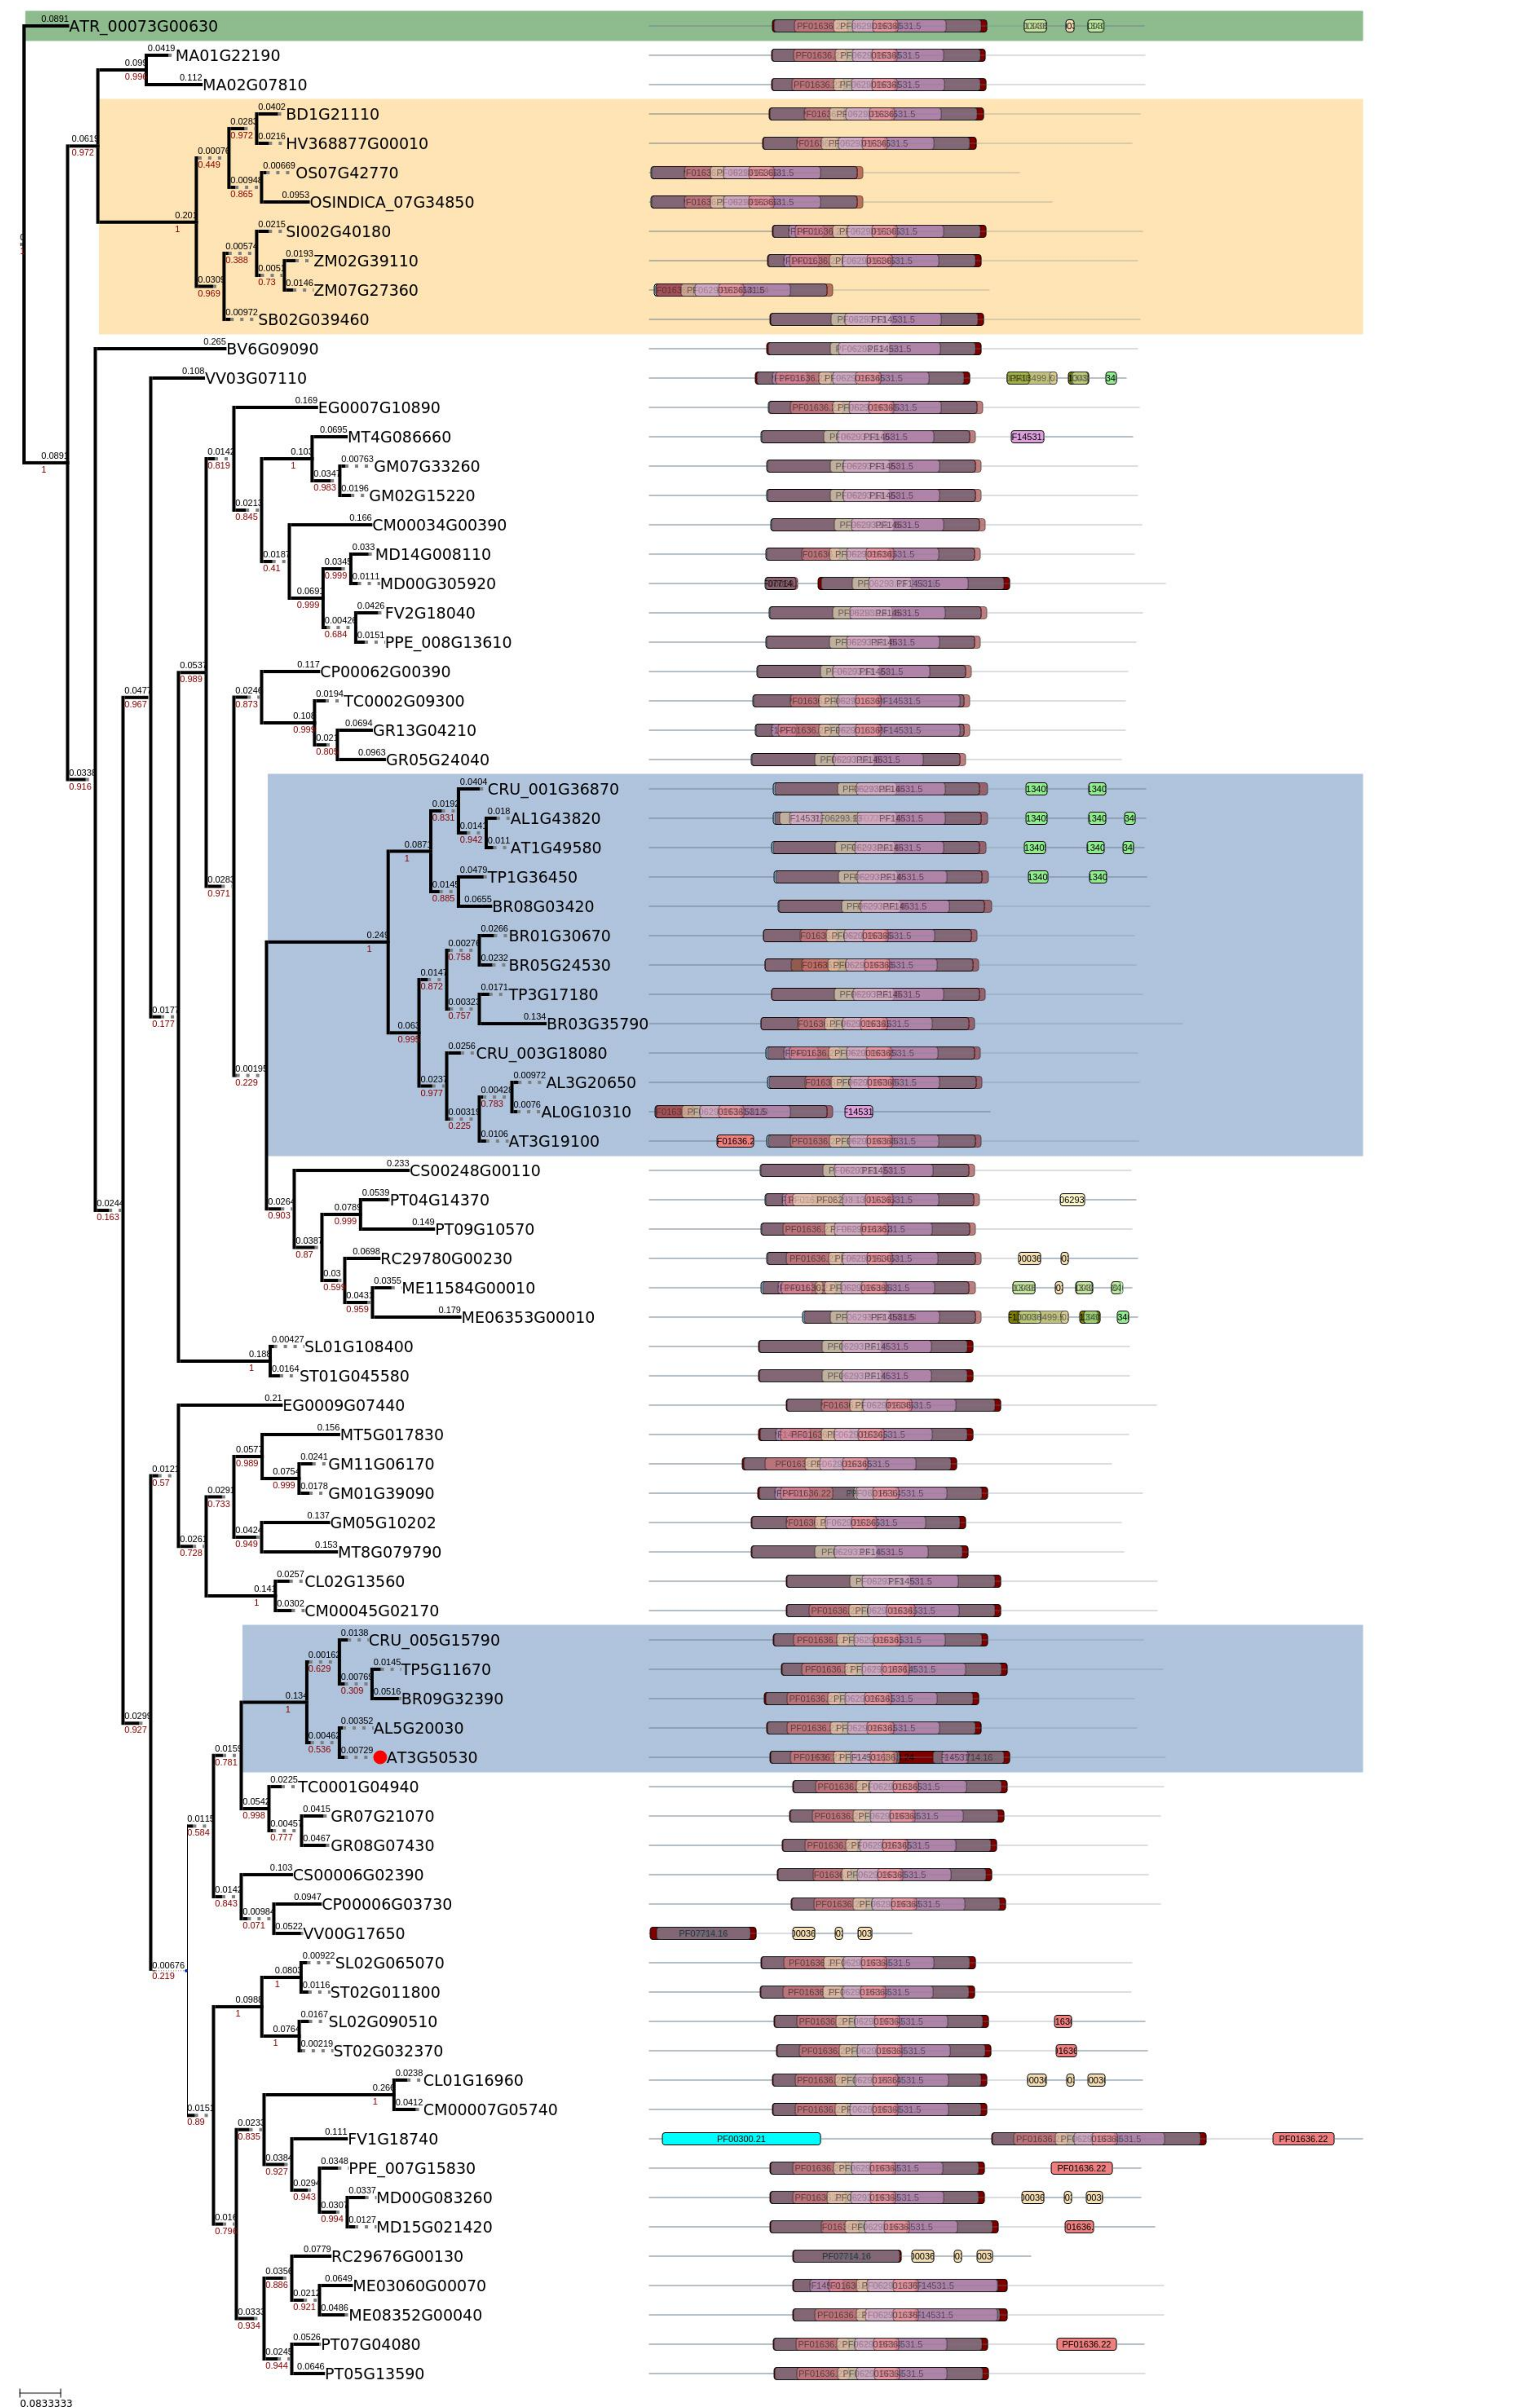

**taxonpmic identity of protein**

- Poaceae**
- Brassicales**
- Out group**
- Amborella trichopoda**

**domain architecture**

- Phosphotransferase\_enzyme\_family\_PF01636\_22
- EF\_hand\_PF00036\_31
- EF\_hand\_domain\_PF13405\_5
- Lipopolysaccharide\_kinase\_Kdo\_WaaP\_family\_PF06293\_13
- Kinase\_like\_PF14531\_5
- Protein\_kinase\_domain\_PF00069\_24
- Protein\_tyrosine\_kinase\_PF07714\_16
- EF\_hand\_domain\_pair\_PF13499\_5
- RIO1\_family\_PF01163\_21
- Histidine\_phosphatase\_superfamily\_branch\_1\_PF00300\_21
- PF01636\_22
- PF00036\_31
- PF13405\_5
- PF06293\_13
- PF14531\_5
- PF07714\_16
- PF13499\_5
- PF00300\_21
- PF01636\_22



**Figure S41.** PhyML phylogenetic relations and composition of domains for AT5G27320, AT3G05120, AT3G63010 homologues of representative plant species. The color legends of species and domains is given below

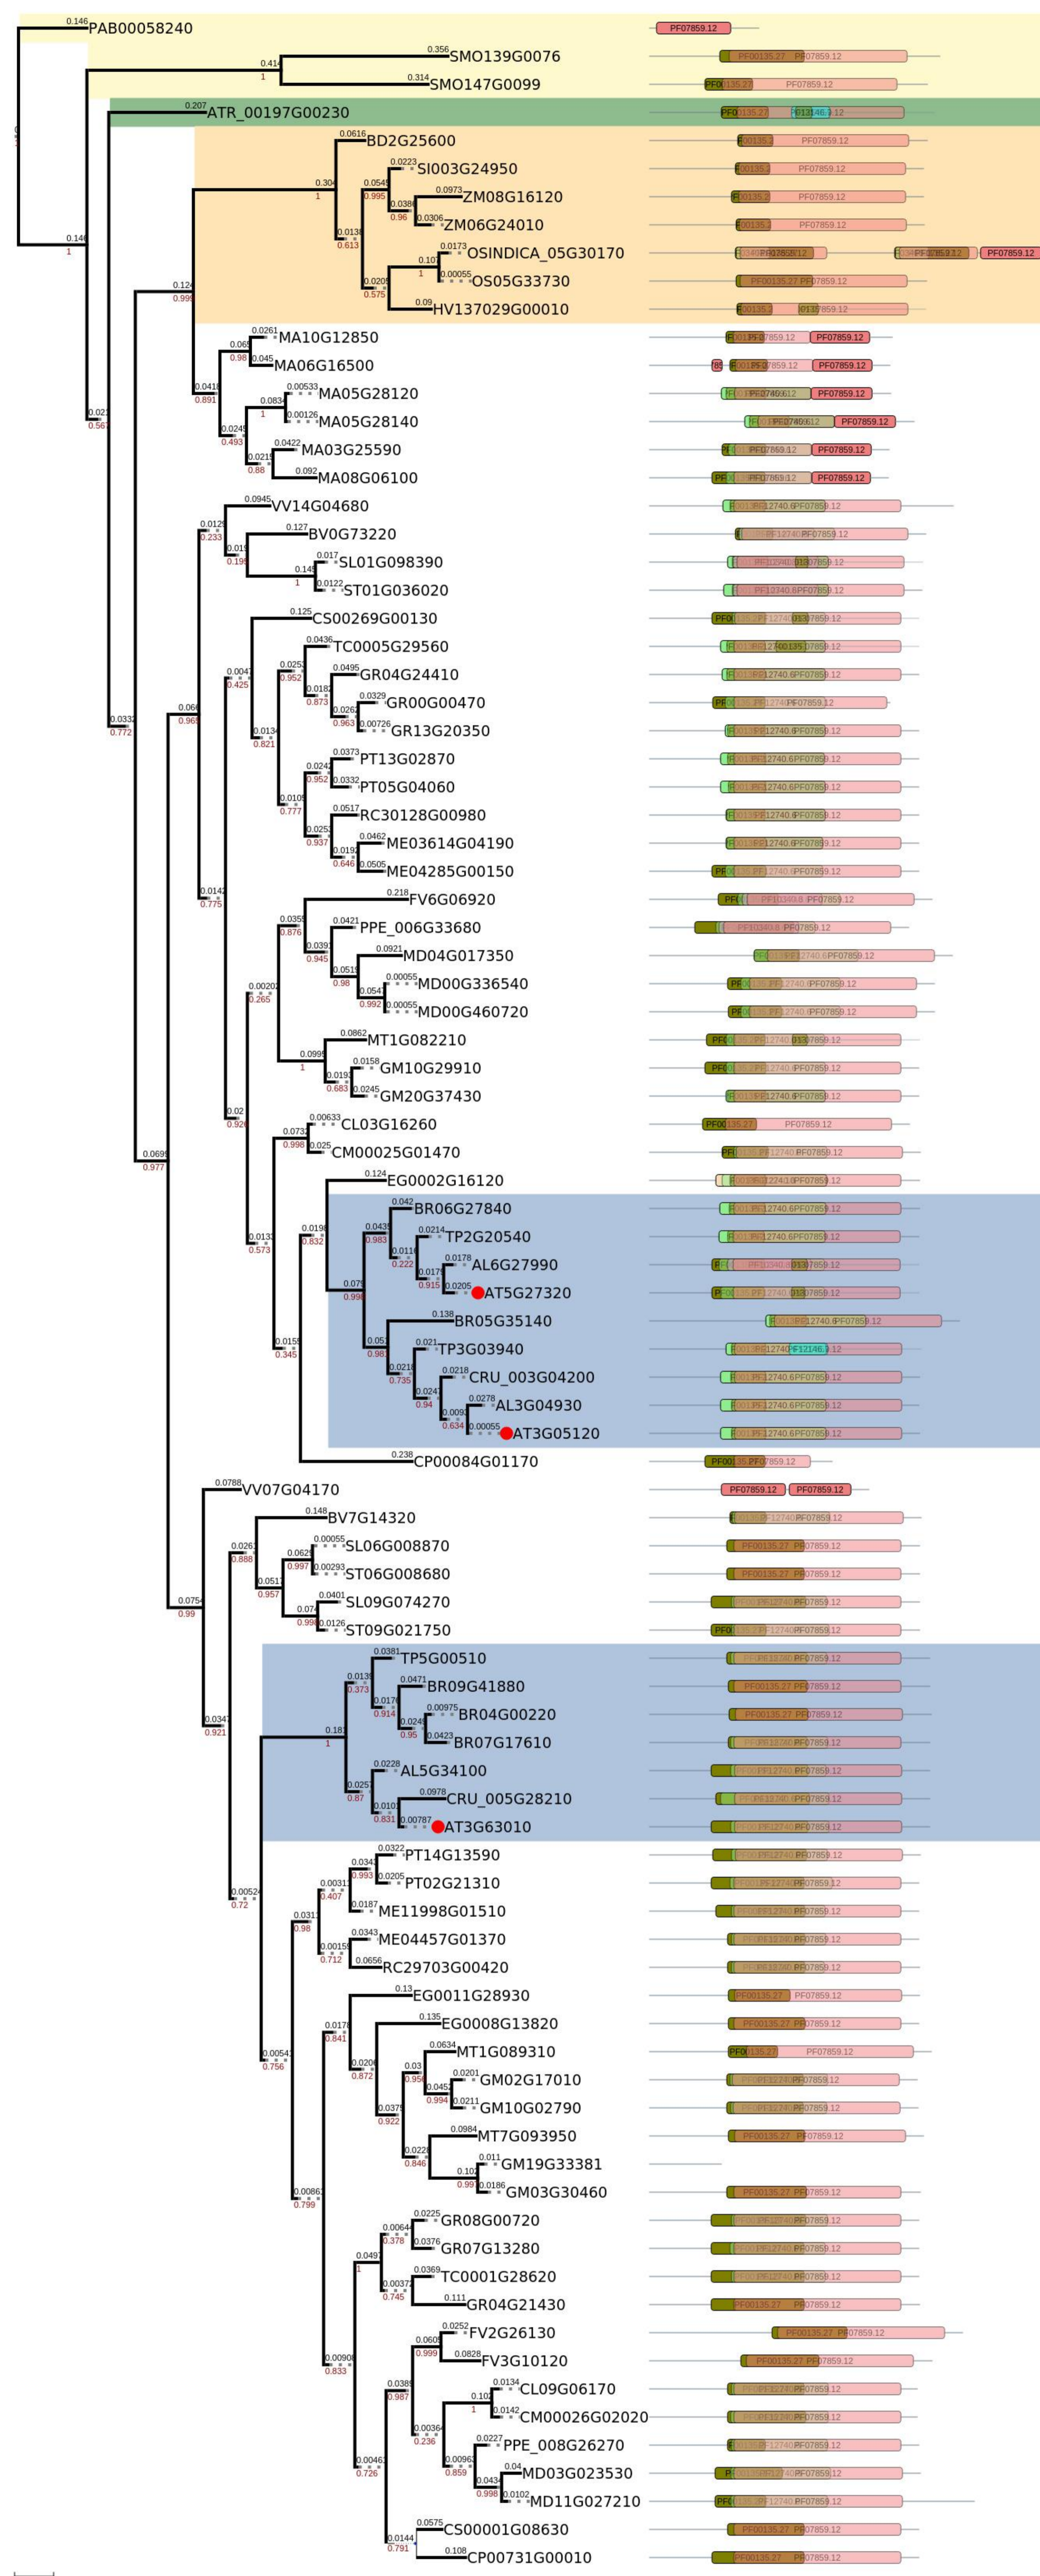

| taxonpmic identity of protein | domain architecture                                              |
|-------------------------------|------------------------------------------------------------------|
| Poaceae                       | alpha_beta_hydrolase_fold_Pf07859_12                             |
| Brassicales                   | Carboxylesterase_family_Pf00135_27                               |
| Out group                     | Serine_aminopeptidase_S33_Pf12146_7                              |
|                               | Platelet_activating_factor_acetylhydrolase_isoform_II_Pf03403_12 |
| Amborella trichopoda          | Chlorophyllase_enzyme_Pf12740_6                                  |
|                               | Steryl_acetyl_hydrolase_Pf10340_8                                |
|                               | Chlorophyllase_Pf07224_10                                        |



**Figure S42.** PhyML phylogenetic relations and composition of domains for AT4G01710, AT5G65274 homologues of representative plant species. The color legends of species and domains is given below

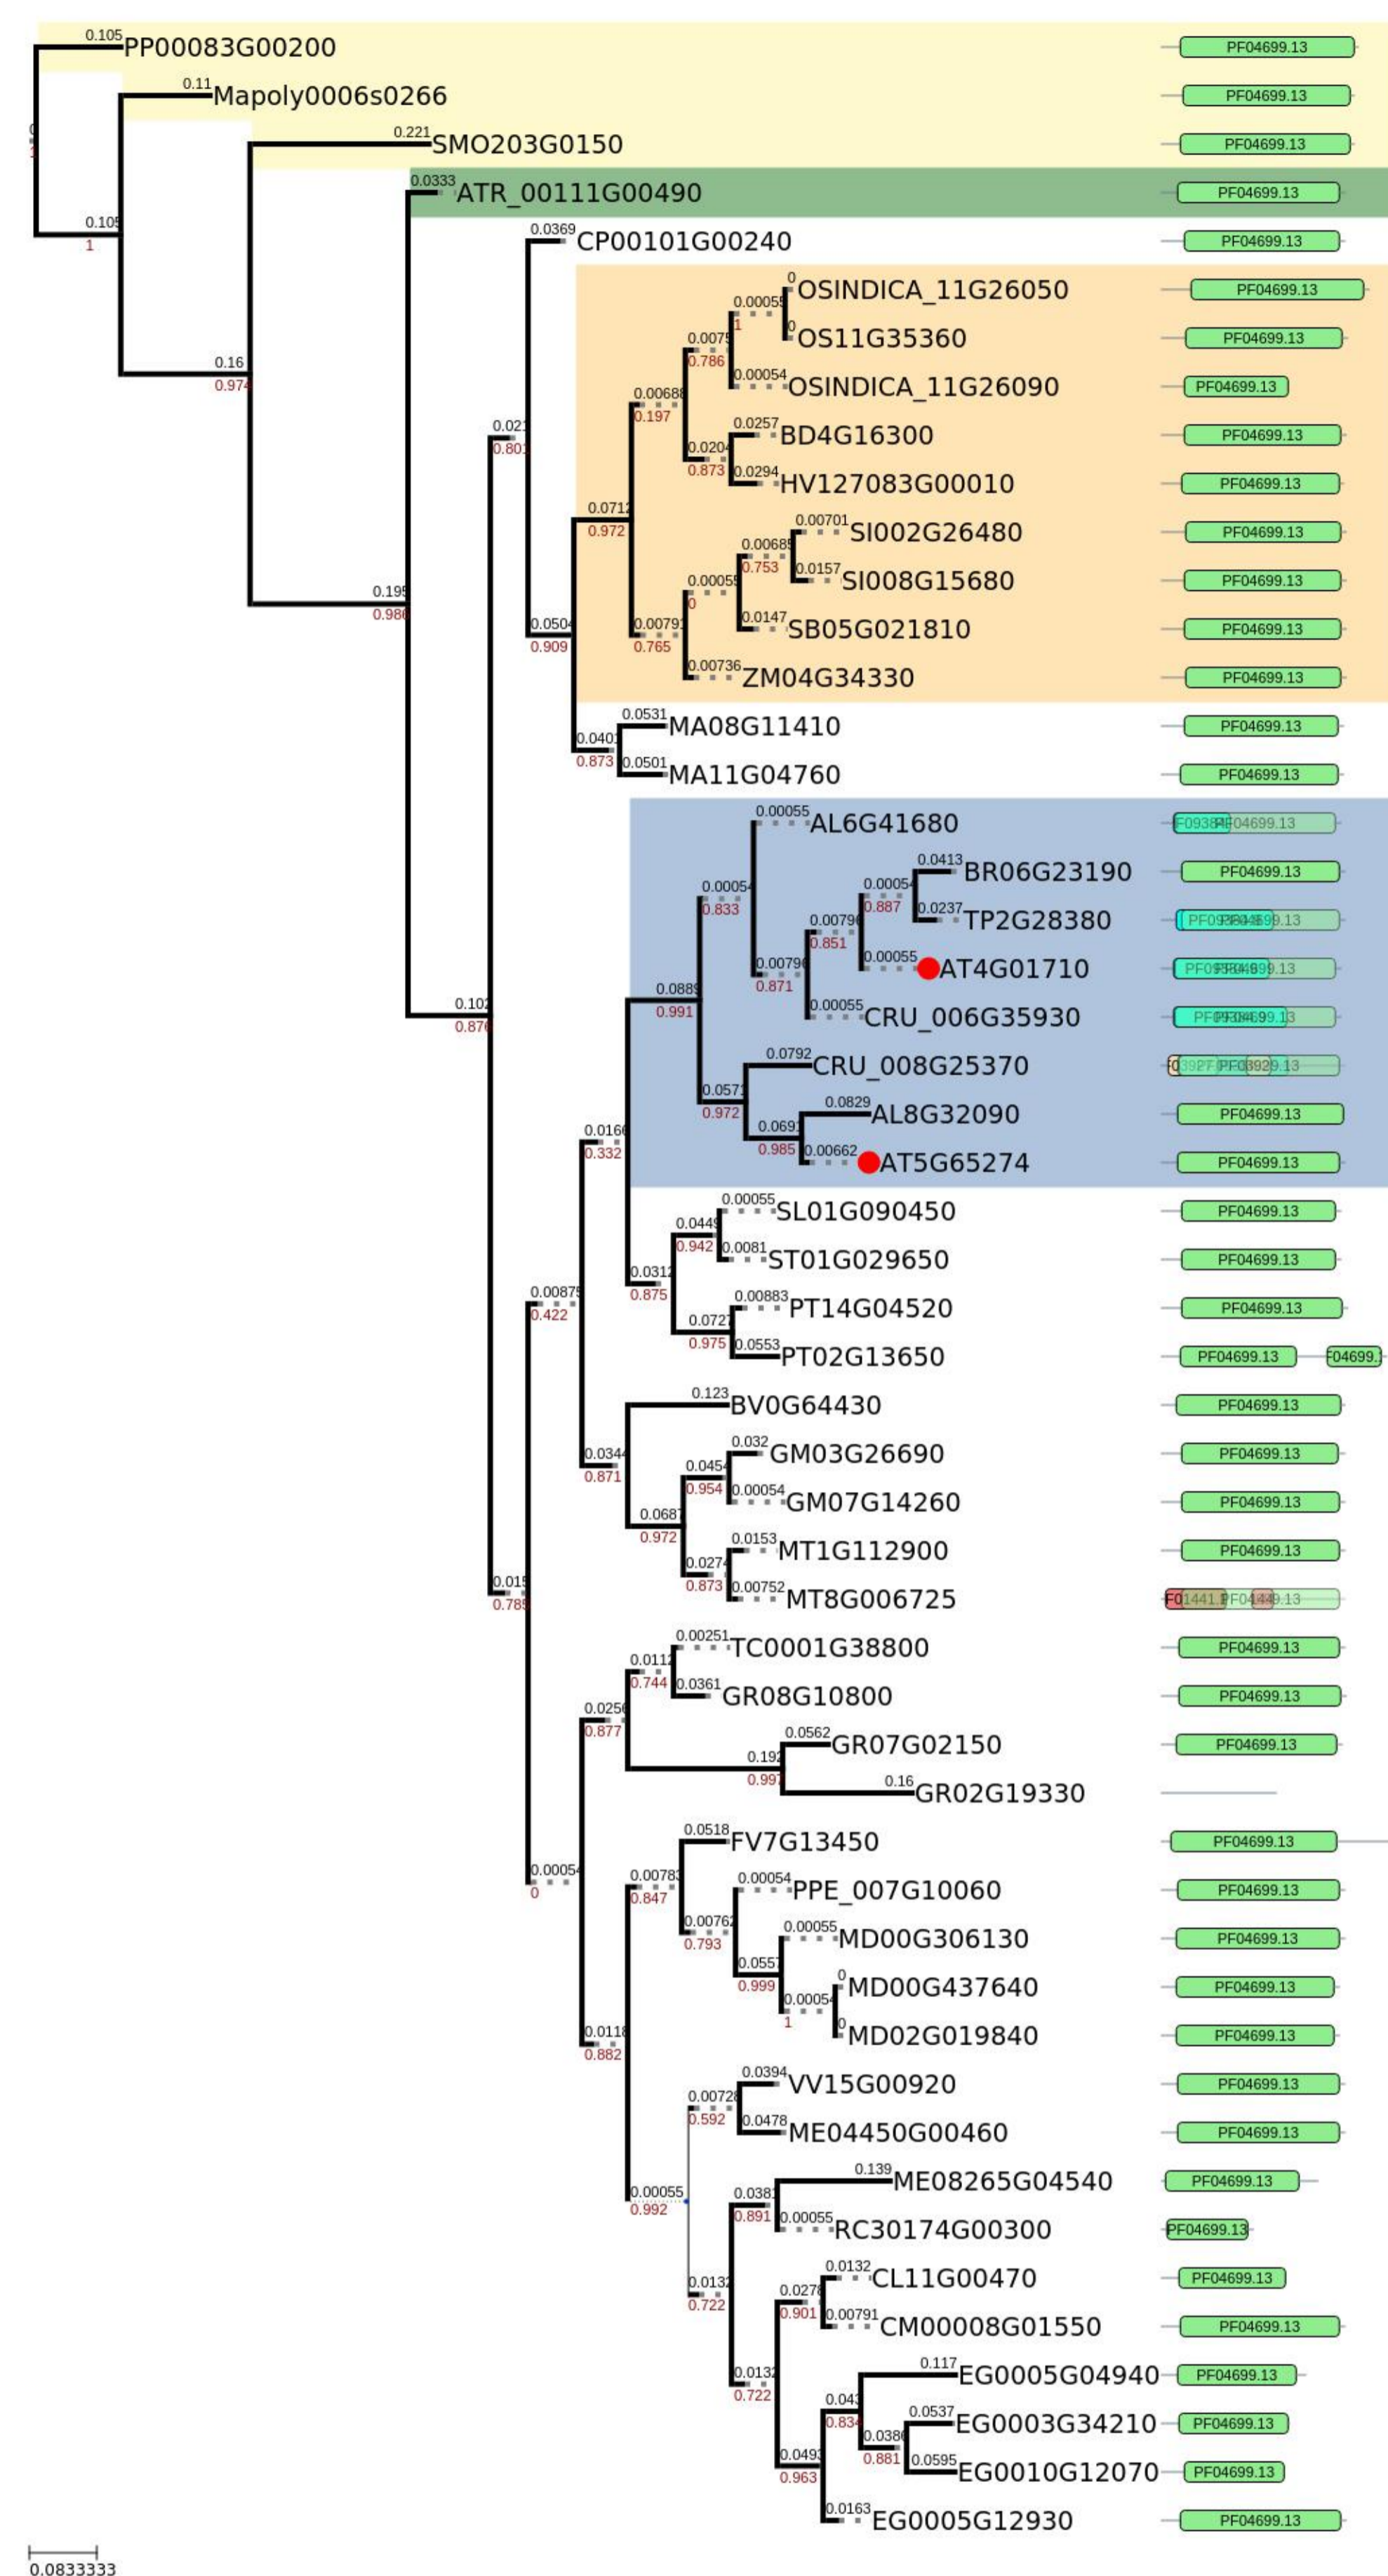

**taxonomic identity of protein domain architecture**

| Taxonomic Group      | Protein Domain Architecture           | Domain ID  |
|----------------------|---------------------------------------|------------|
| Poaceae              | ARP2_3_complex_16_kDa_subunit_p16_Arc | PF04699.13 |
| Poaceae              | UTP15_C_terminal                      | PF09384.9  |
| Brassicales          | NapD_protein                          | PF03927.12 |
| Brassicales          | Lipoprotein                           | PF01441.18 |
| Out group            |                                       |            |
| Amborella trichopoda |                                       |            |



**Figure S43.** PhyML phylogenetic relations and composition of domains for AT4G02570 homologues of representative plant species. The color legends of species and domains is given below

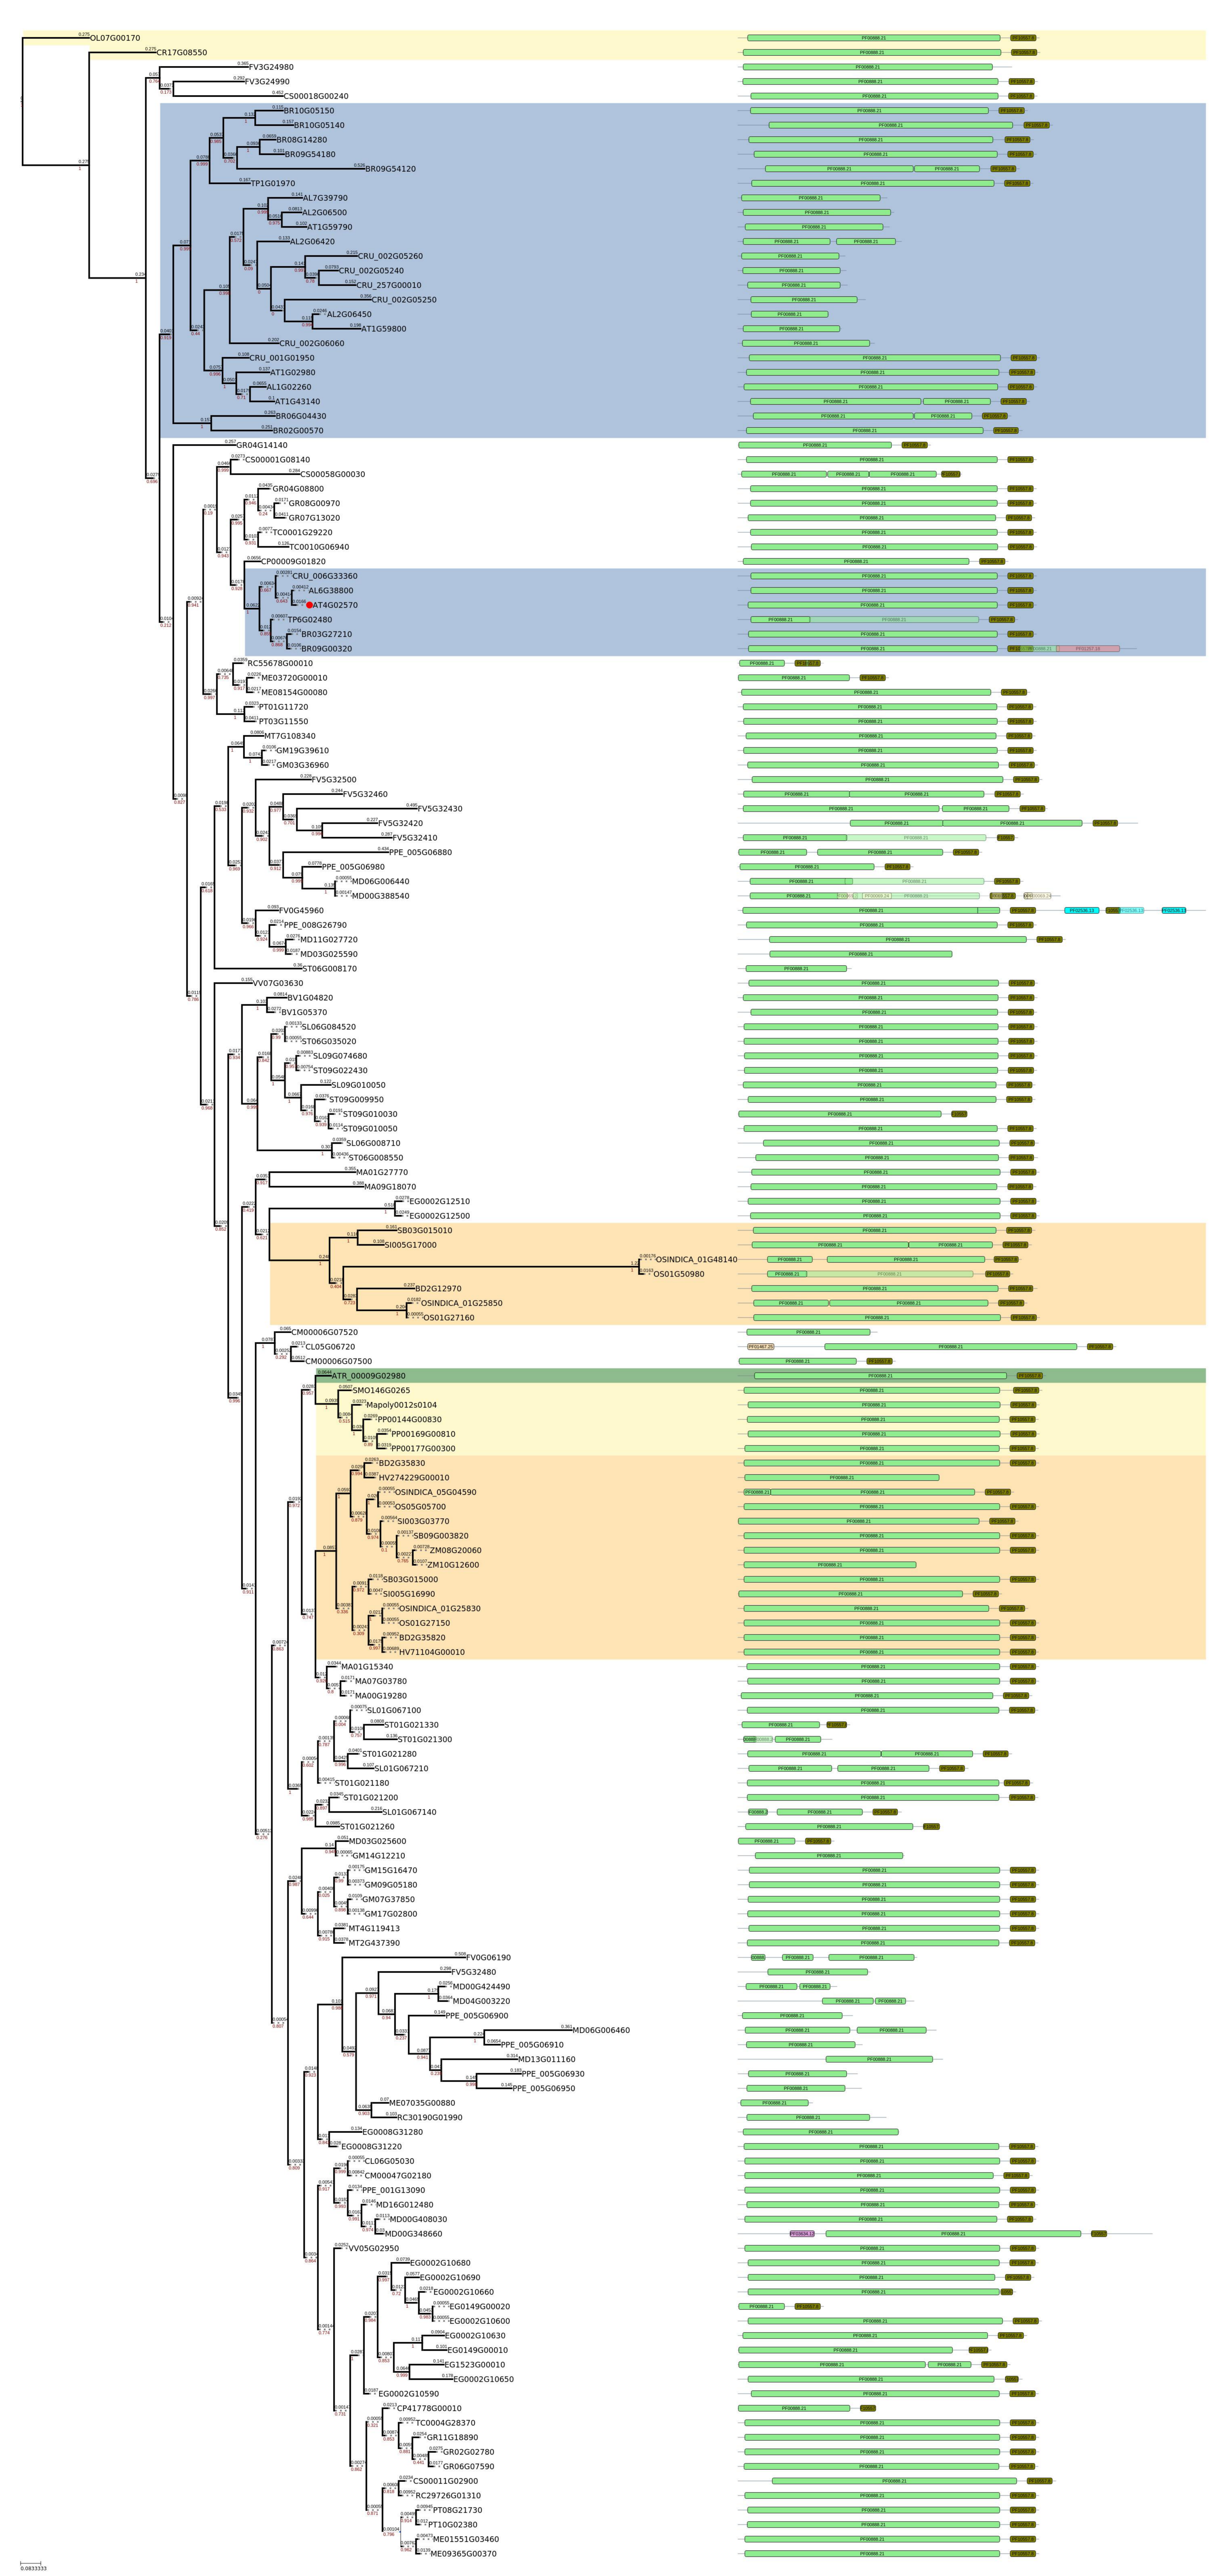

| taxonomic identity of protein | domain architecture                             |
|-------------------------------|-------------------------------------------------|
| <b>Poaceae</b>                | Cullin_family_Pf00888_21                        |
|                               | Cullin_protein_neddylation_domain_Pf10557_8     |
| <b>Brassicales</b>            | Thioredoxin_like_2Fe_2S_2_ferredoxin_Pf01257_18 |
|                               | Protein_kinase_domain_Pf00069_24                |
| <b>Out group</b>              | mTERF_Pf02536_13                                |
|                               | Cytidyllyltransferase_like_Pf01467_25           |
| <b>Amborella trichopoda</b>   | TCP_family_transcription_factor_Pf03634_12      |



**Figure S44.** PhyML phylogenetic relations and composition of domains for AT4G12610 homologues of representative plant species. The color legends of species and domains is given below

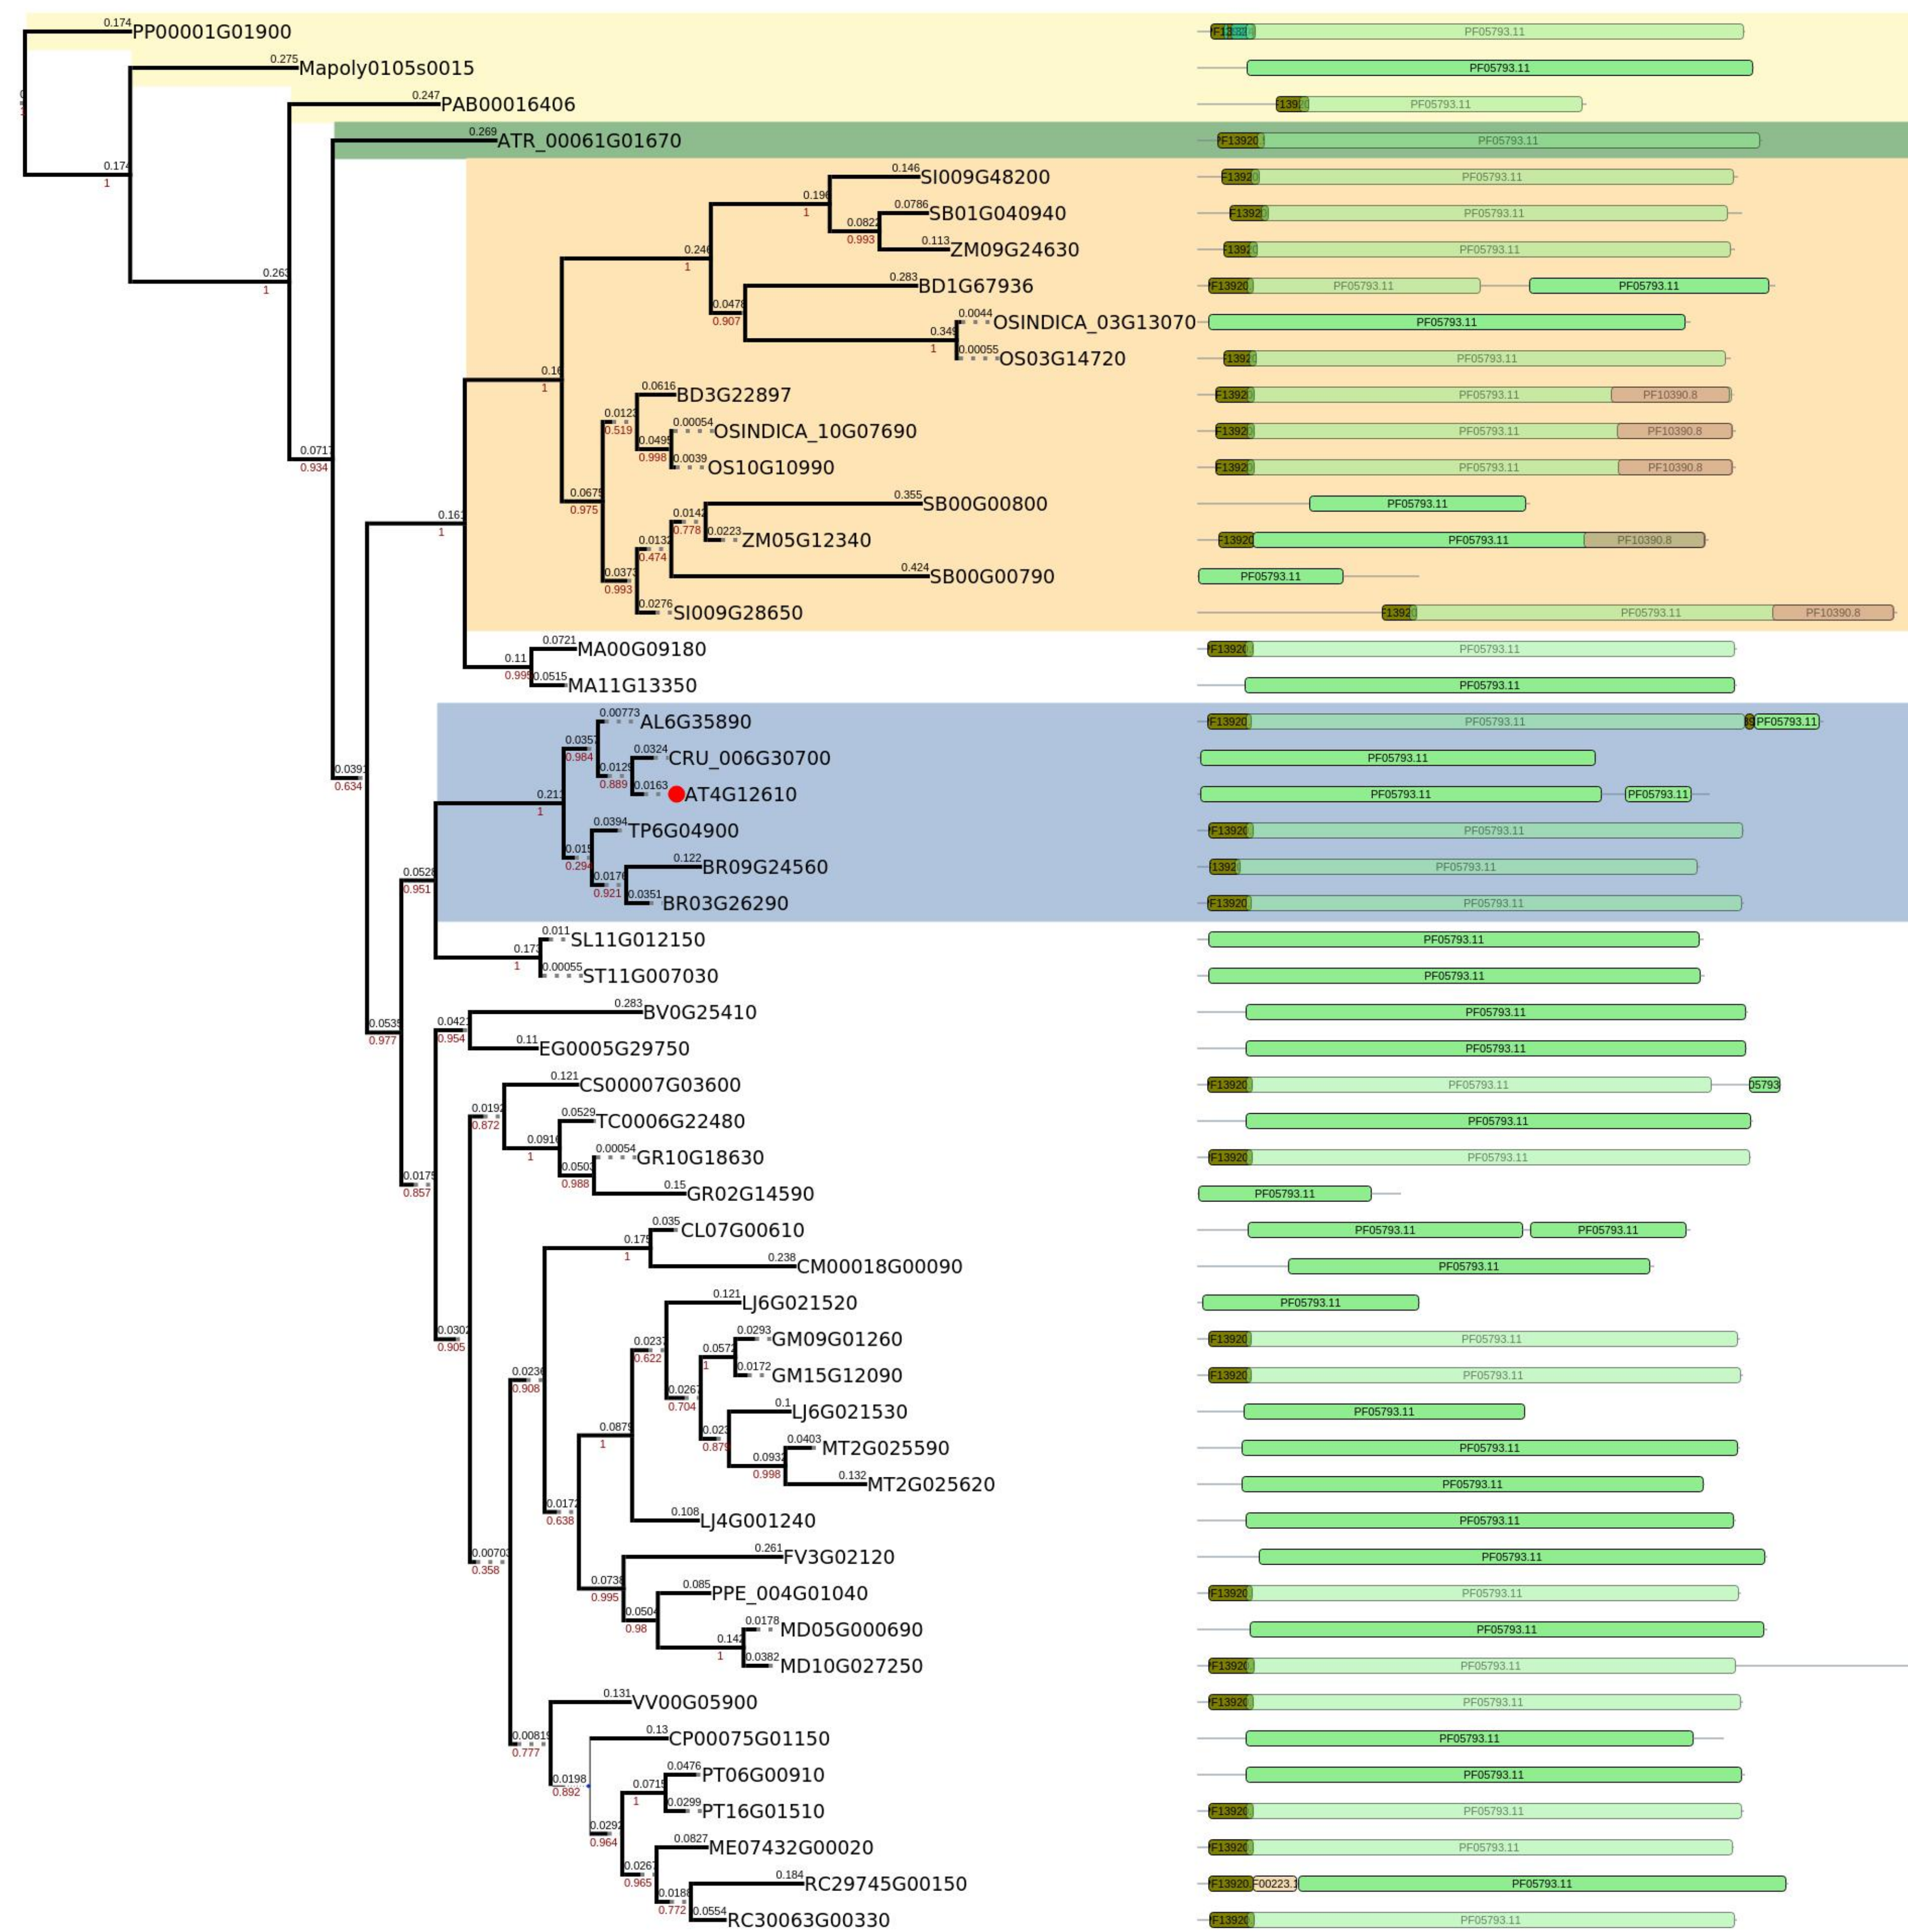

0.0833333

taxonpmic identity of protein domain architecture

- Poaceae
- Brassicales
- Out group
- Amborella trichopoda

- Transcription\_initiation\_factor\_IIF\_alpha\_subunit\_TFIIF\_alpha\_PF05793\_11
- Zinc\_finger\_C3HC4\_type\_RING\_finger\_PF13920\_5
- zinc\_ribbon\_domain\_PF13240\_5
- RNA\_polymerase\_II\_elongation\_factor\_ELL\_PF10390\_8
- Photosystem\_I\_psaA\_psaB\_protein\_PF00223\_18

- PF05793.11
- PF13920.5
- PF13240.5
- PF10390.8
- PF00223.18
