# Supplementary material for: The evolution of gene regulatory networks controlling Arabidopsis thaliana L. trichome development
Source: PubMed Central journal article supplement (PMC6393967; doi:10.1186/s12870-019-1640-2), 2019-02-15
Supplement: 12870_2019_1640_MOESM11_ESM.pdf [file 12870_2019_1640_MOESM11_ESM.pdf]

**Figure S45.** PhyML phylogenetic relations and composition of domains for AT4G14147 homologues of representative plant species. The color legends of species and domains is given below

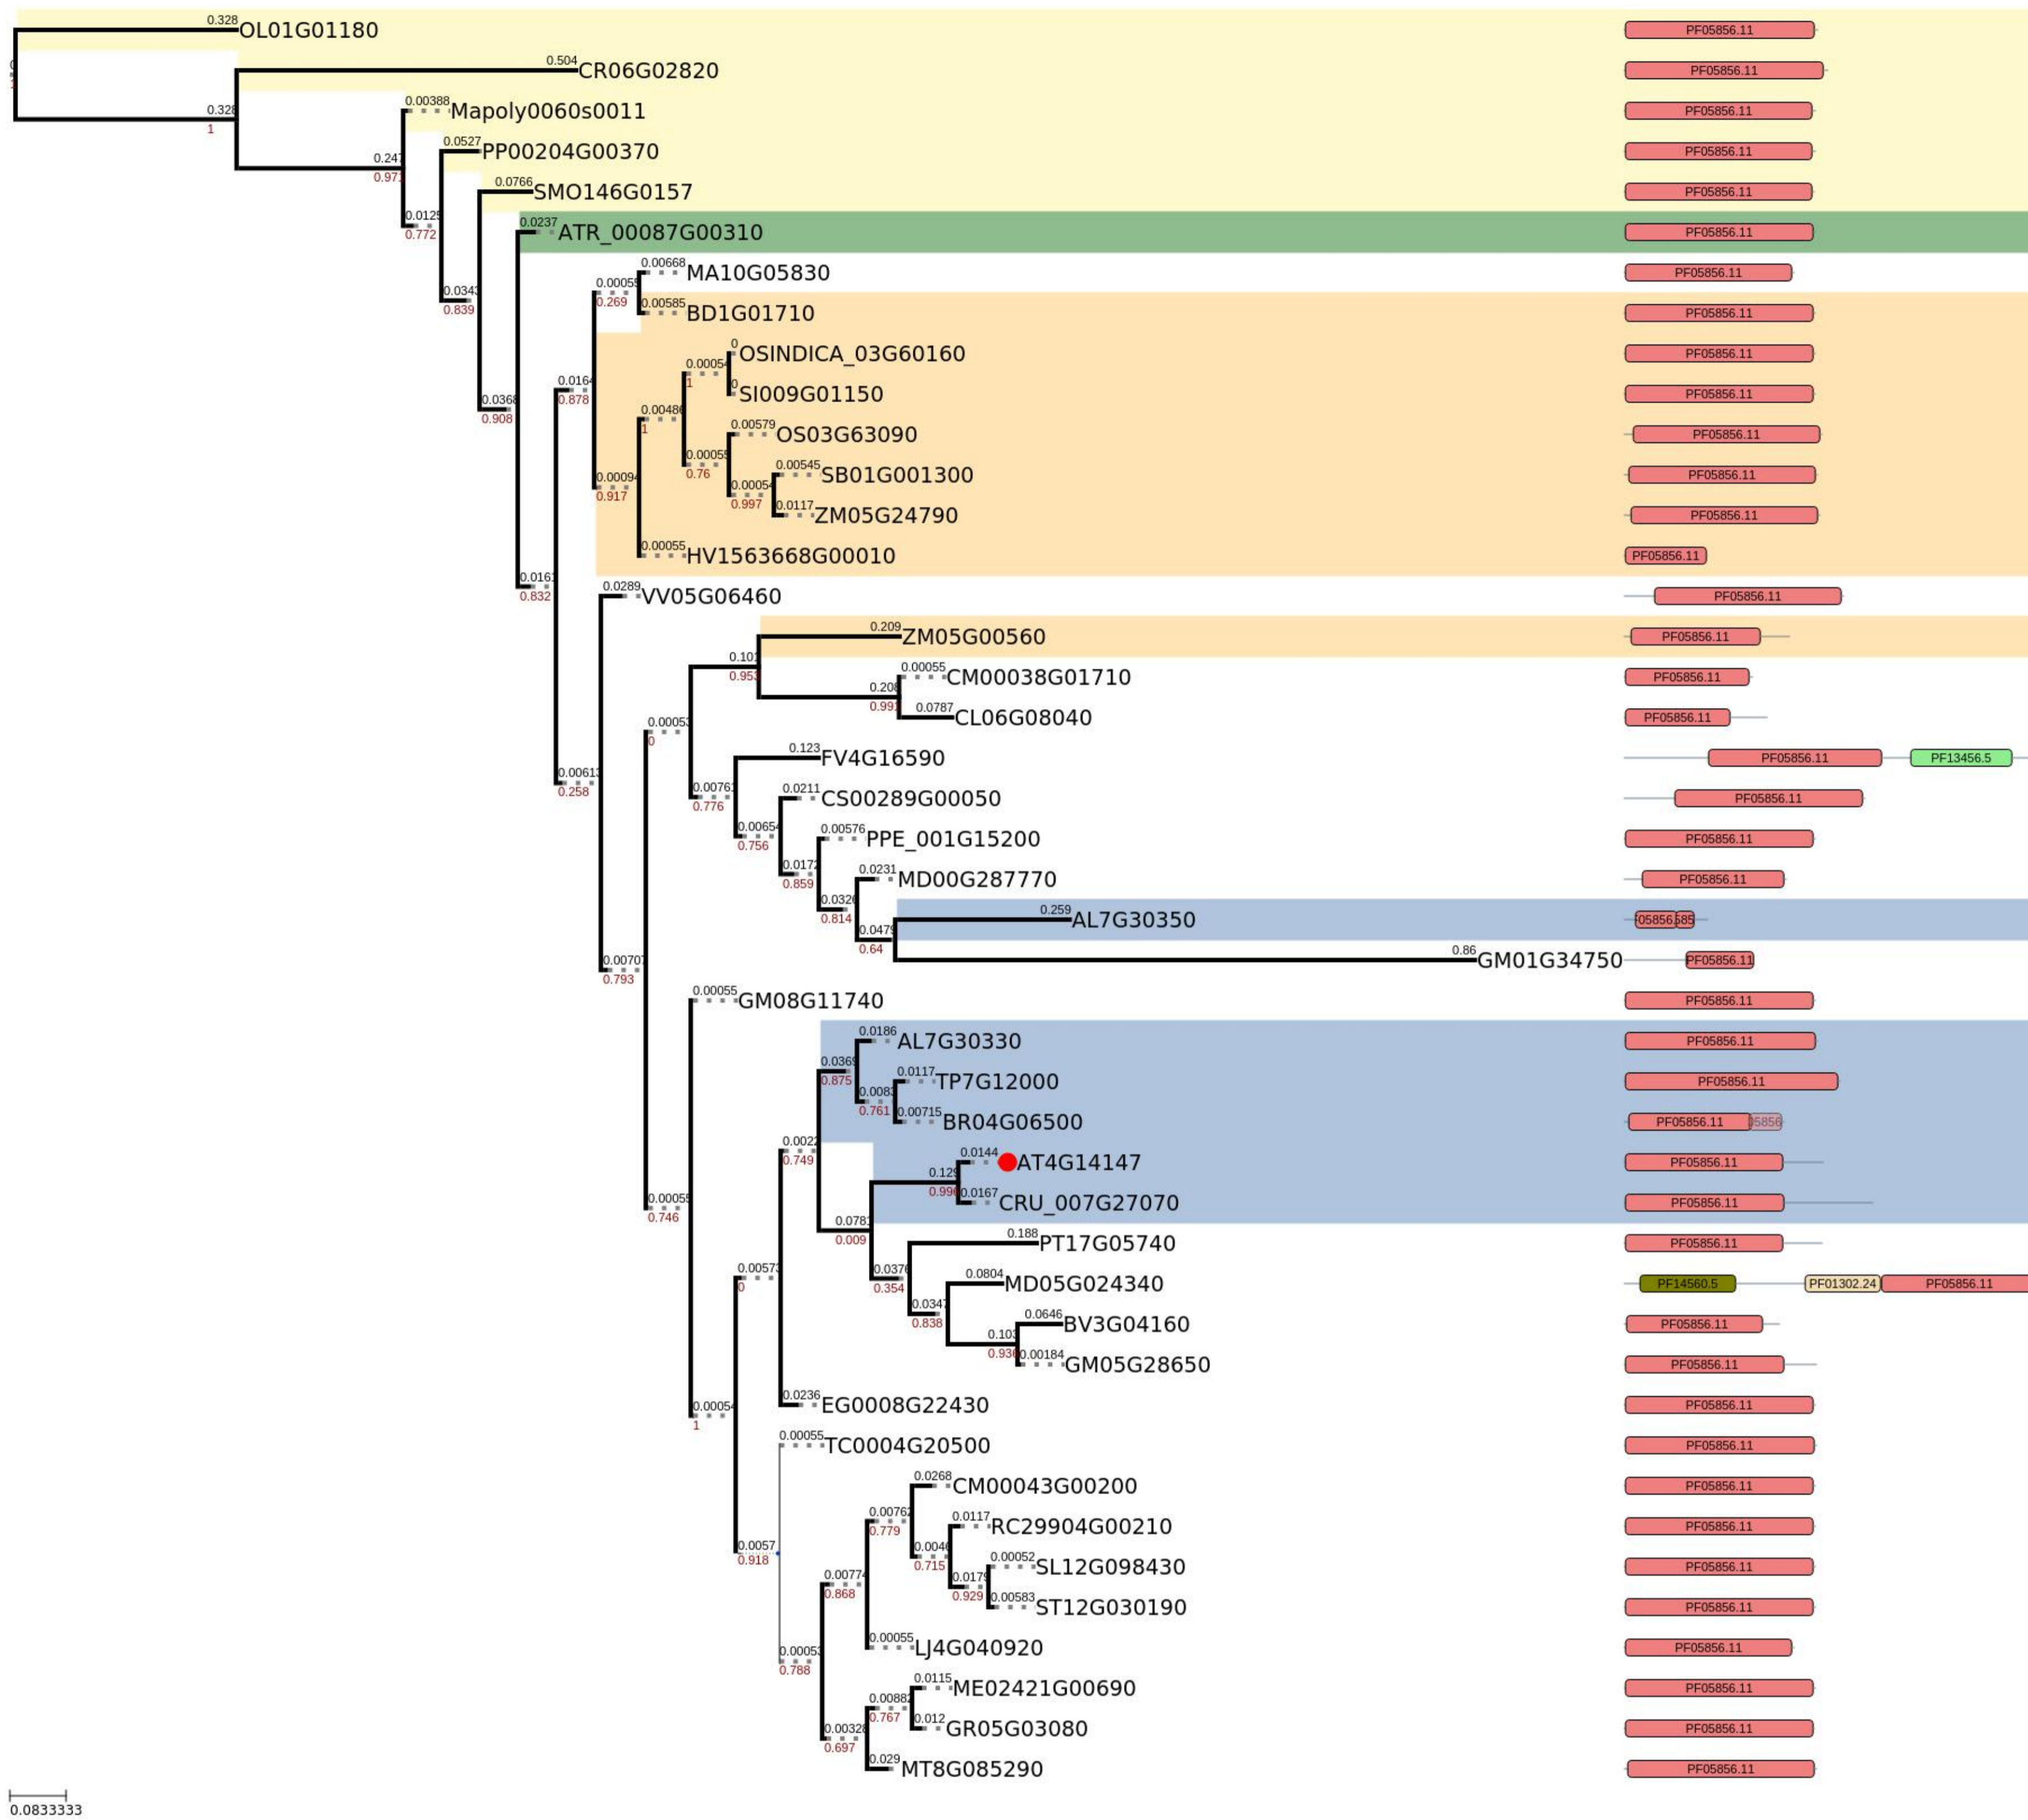

taxonomic identity of protein    domain architecture

|                    |                                                |  |
|--------------------|------------------------------------------------|--|
| <b>Poaceae</b>     | ARP2_3_complex_20_kDa_subunit_ARPC4_PF05856_11 |  |
|                    | Reverse_transcriptase_like_PF13456_5           |  |
| <b>Brassicales</b> | CAP_Gly_domain_PF01302_24                      |  |
| <b>Out group</b>   | Ubiquitin_like_domain_PF14560_5                |  |



**Figure S46.** PhyML phylogenetic relations and composition of domains for AT4G15415 homologues of representative plant species. The color legends of species and domains is given below

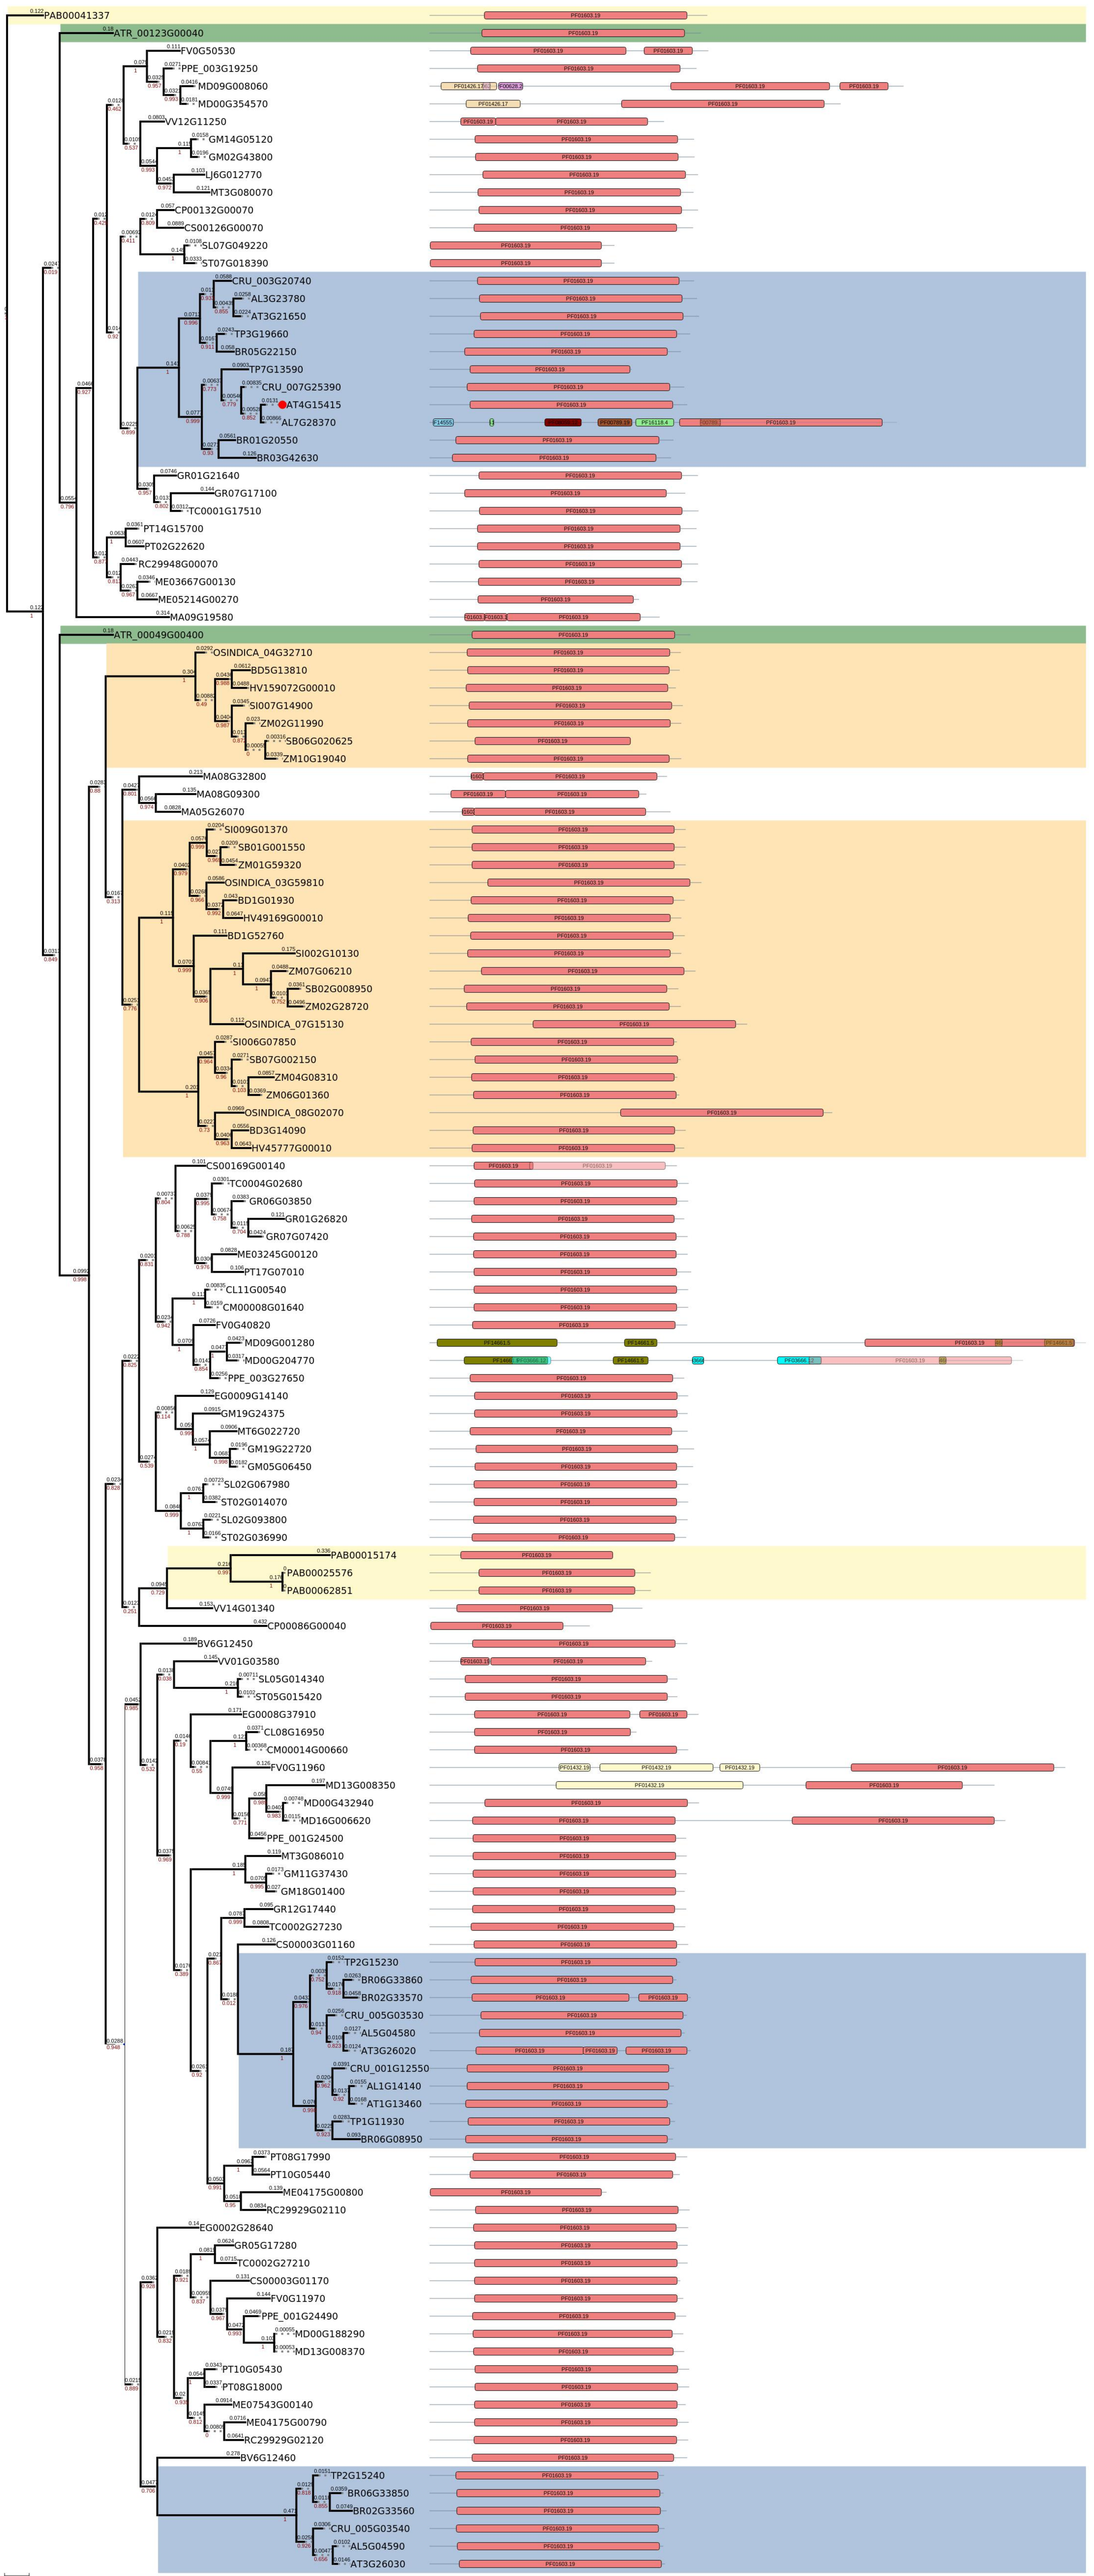

**taxonpmic identity of protein**

- Poaceae
- Brassicales
- Out group
- Amborella trichopoda

**domain architecture**

- Protein\_phosphatase\_2A\_regulatory\_B\_subunit\_B56\_family\_PF01603\_19 PF01603\_19
- BAH\_domain\_PF01426\_17 PF01426\_17
- PHD\_finger\_PF00628\_28 PF00628\_28
- Domain\_of\_unknown\_function\_DUF4834\_FF16118\_4 PF16118\_4
- SEP\_domain\_PF08059\_12 PF08059\_12
- UBA\_like\_domain\_PF14555\_5 PF14555\_5
- UBX\_domain\_PF00789\_19 PF00789\_19
- HAUS\_augmin\_like\_complex\_subunit\_6\_N\_terminus\_PF14661\_5 PF14661\_5
- Nitrogen\_Permease\_regulator\_of\_amino\_acid\_transport\_activity\_3\_PF03666\_12 PF03666\_12
- Peptidase\_family\_M3\_PF01432\_19 PF01432\_19



**Figure S47.** PhyML phylogenetic relations and composition of domains for AT4G20780 homologues of representative plant species. The color legends of species and domains is given below

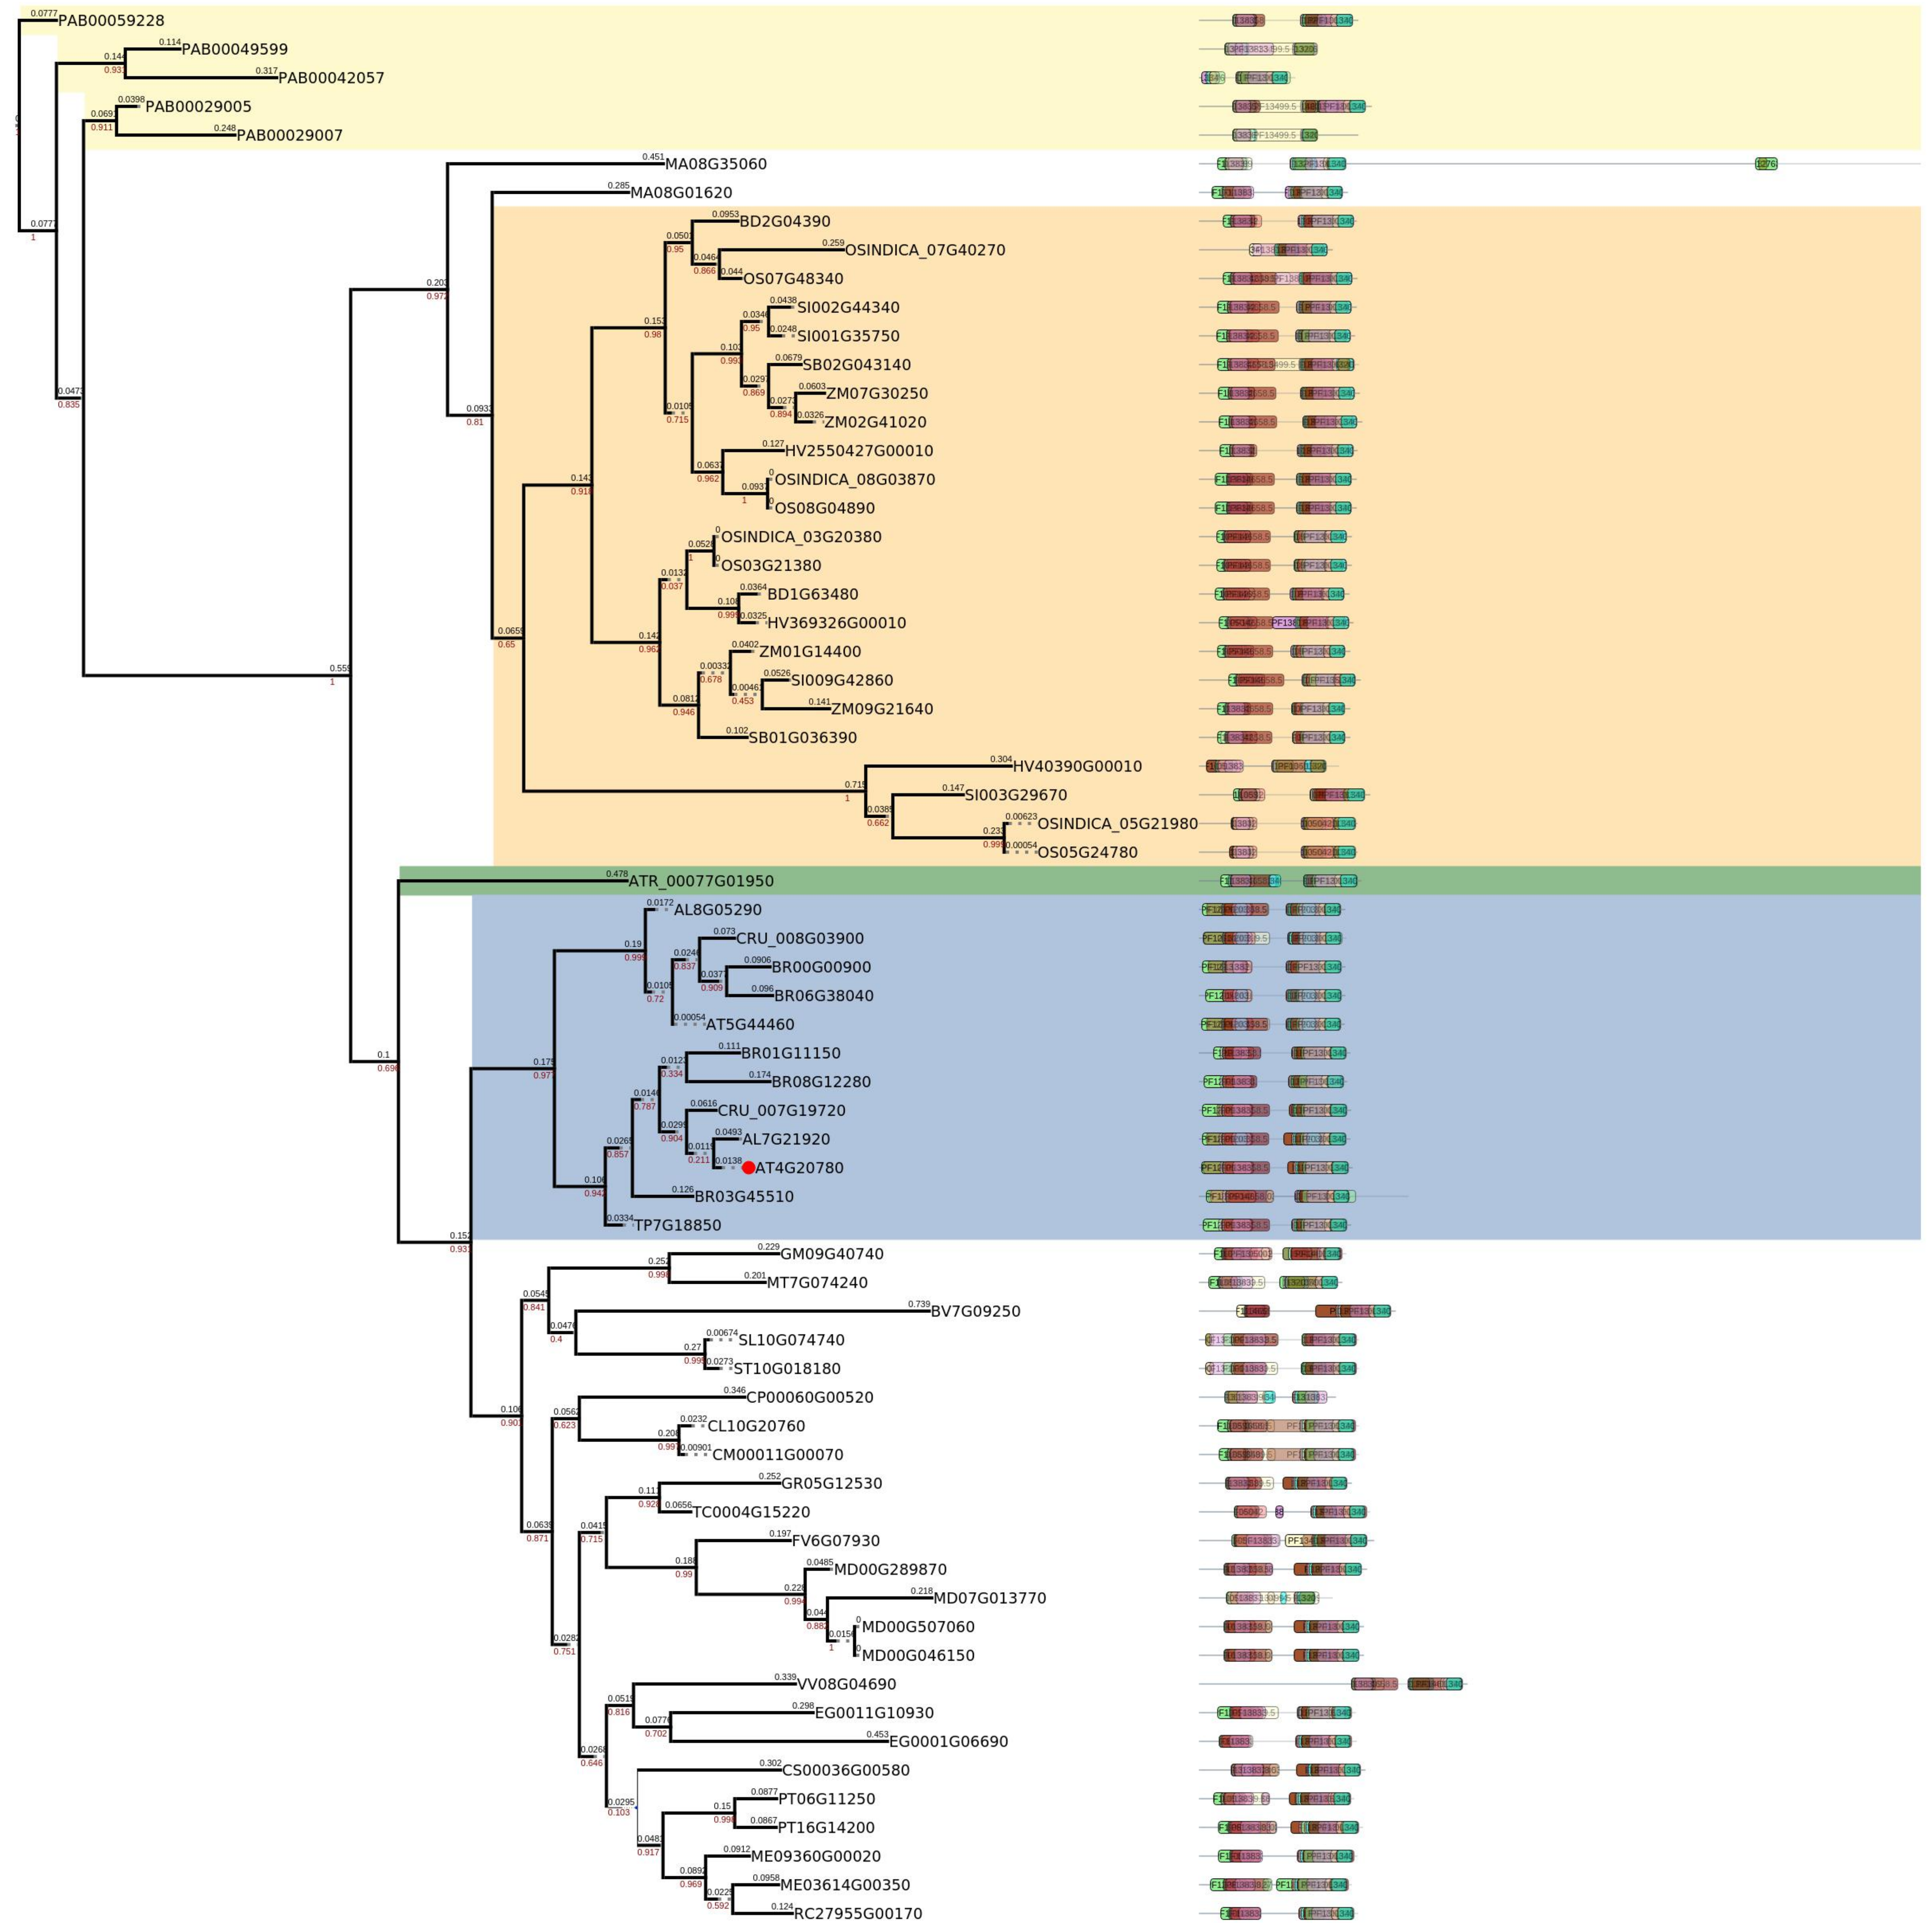

0.0833333  
**taxonpmic identity of protein**

**domain architecture**

- Poaceae**
- Brassicales**
- Out group**
- Amborella trichopoda**

- EF\_hand\_Pf00036\_31
- EF\_hand\_Pf13202\_5
- EF\_hand\_domain\_Pf13405\_5
- EF\_hand\_domain\_pair\_Pf13499\_5
- EF\_hand\_domain\_pair\_Pf13833\_5
- EF\_hand\_domain\_Pf14658\_5
- Cytoskeletal\_regulatory\_complex\_EF\_hand\_Pf12763\_6
- Caleosin\_related\_protein\_Pf05042\_12

- PF00036\_31
- PF13202\_5
- PF13405\_5
- PF13499\_5
- PF13833\_5
- PF14658\_5
- PF12763\_6
- PF05042\_12

- Secreted\_protein\_acidic\_and\_rich\_in\_cysteine\_Ca\_binding\_region\_Pf10591\_8
- SAP\_domain\_Pf02037\_26

- PF10591\_8
- PF02037\_26



**Figure S48.** PhyML phylogenetic relations and composition of domains for AT4G22910 homologues of representative plant species. The color legends of species and domains is given below

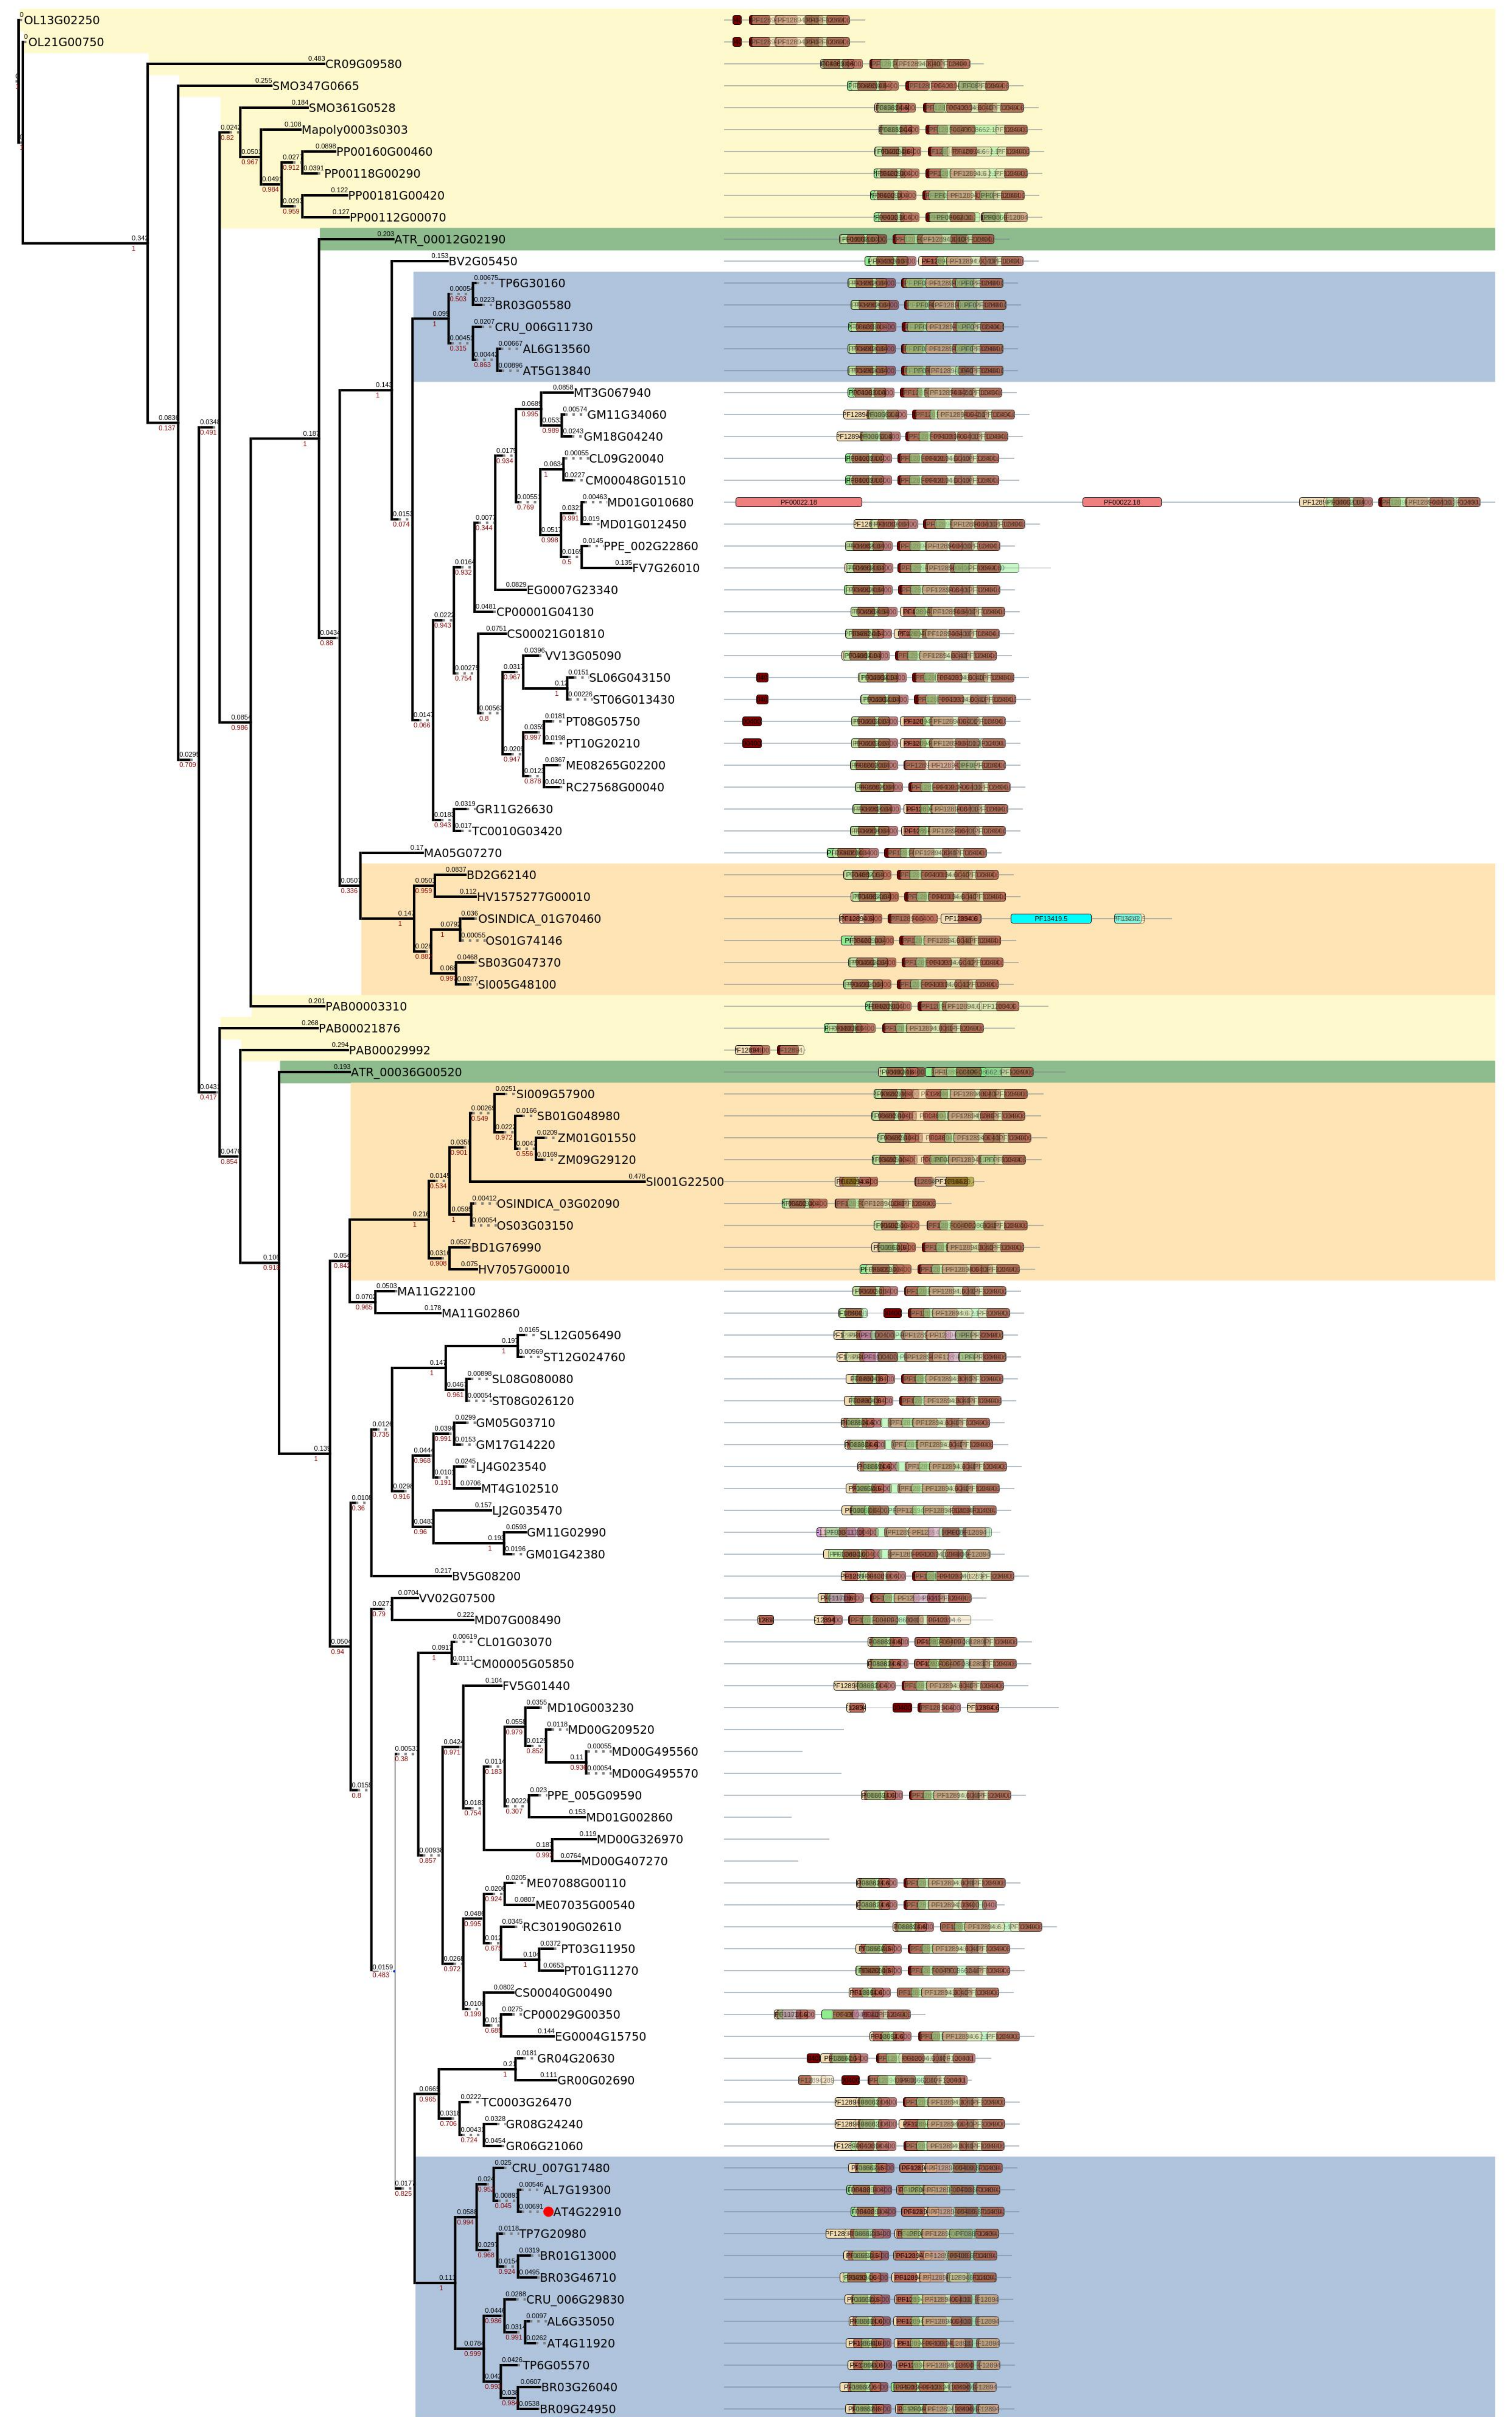

| taxonpmic identity of protein | domain architecture                                             |
|-------------------------------|-----------------------------------------------------------------|
| <b>Poaceae</b>                | Anaphase_promoting_complex_subunit_4_WD40_domain_PFI2894_6      |
|                               | Eukaryotic_translation_initiation_factor_eIF2A_PFO8662_10       |
| <b>Brassicales</b>            | WD_domain_G_beta_repeat_PFO0400_31                              |
|                               | Actin_PFO0022_18                                                |
| <b>Out group</b>              | Haloacid_dehalogenase_like_hydrolase_PFI3419_5                  |
|                               | HAD_hydrolase_like_PFI3242_5                                    |
| <b>Amborella trichopoda</b>   | WD40_region_of_Ge1_enhancer_of_mRNA_decapping_protein_PFI6529_4 |
|                               | Nucleoporin_Nup120_160_PFI1715_7                                |

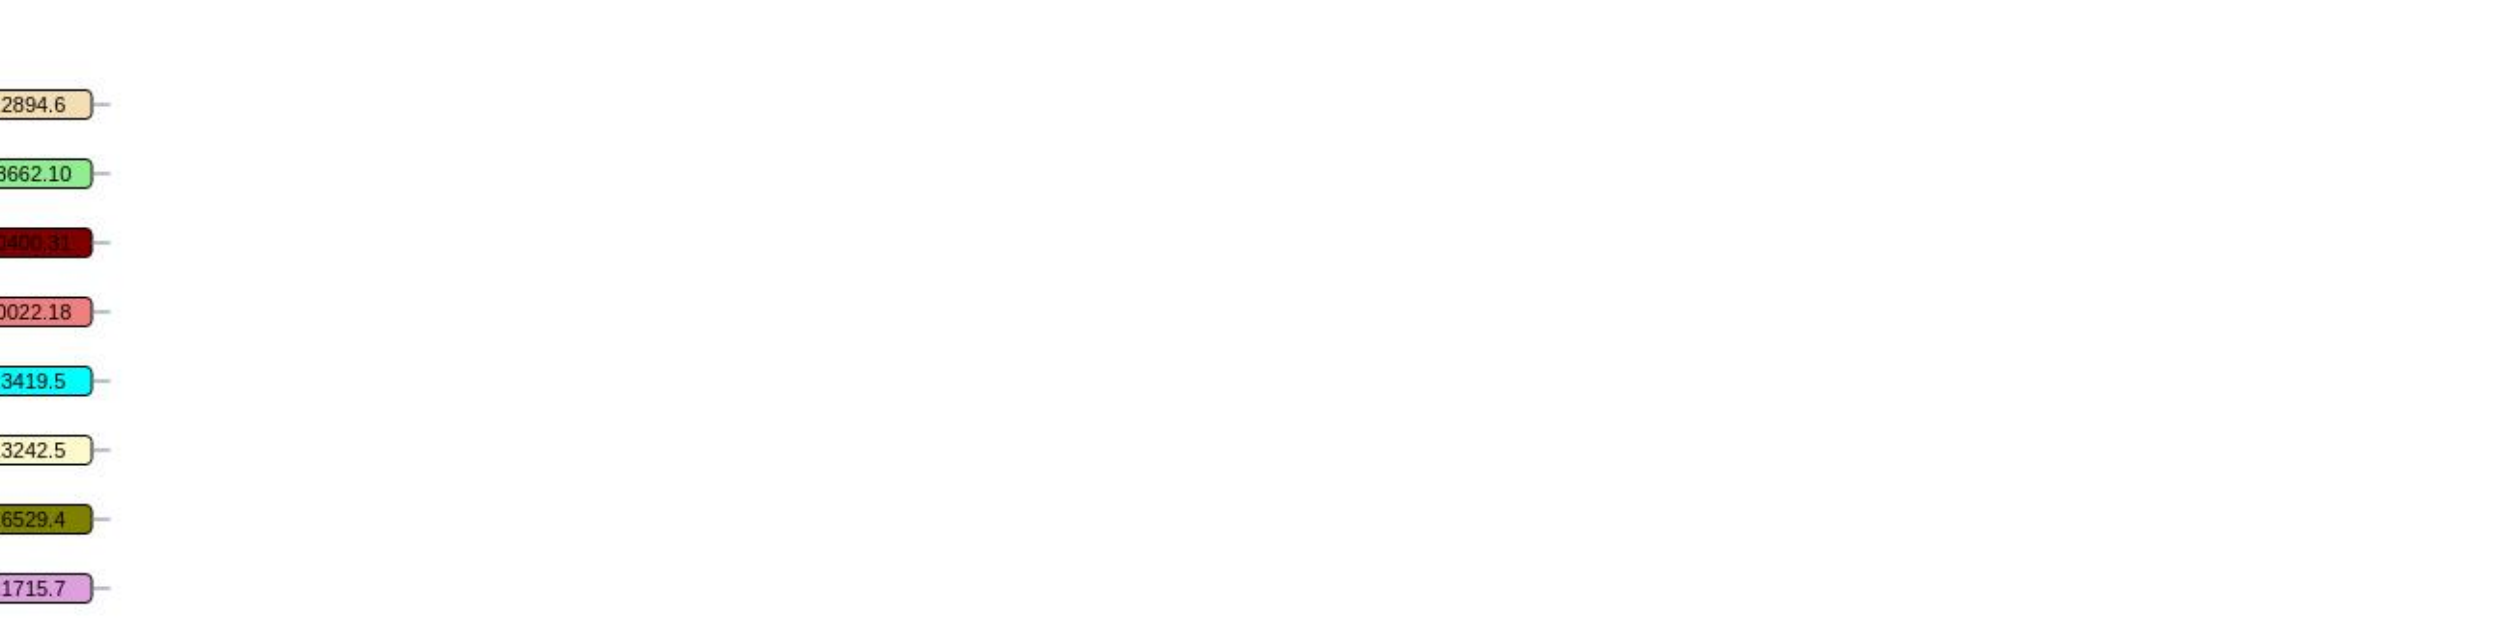



**Figure S49.** PhyML phylogenetic relations and composition of domains for AT4G24210 homologues of representative plant species. The color legends of species and domains is given below

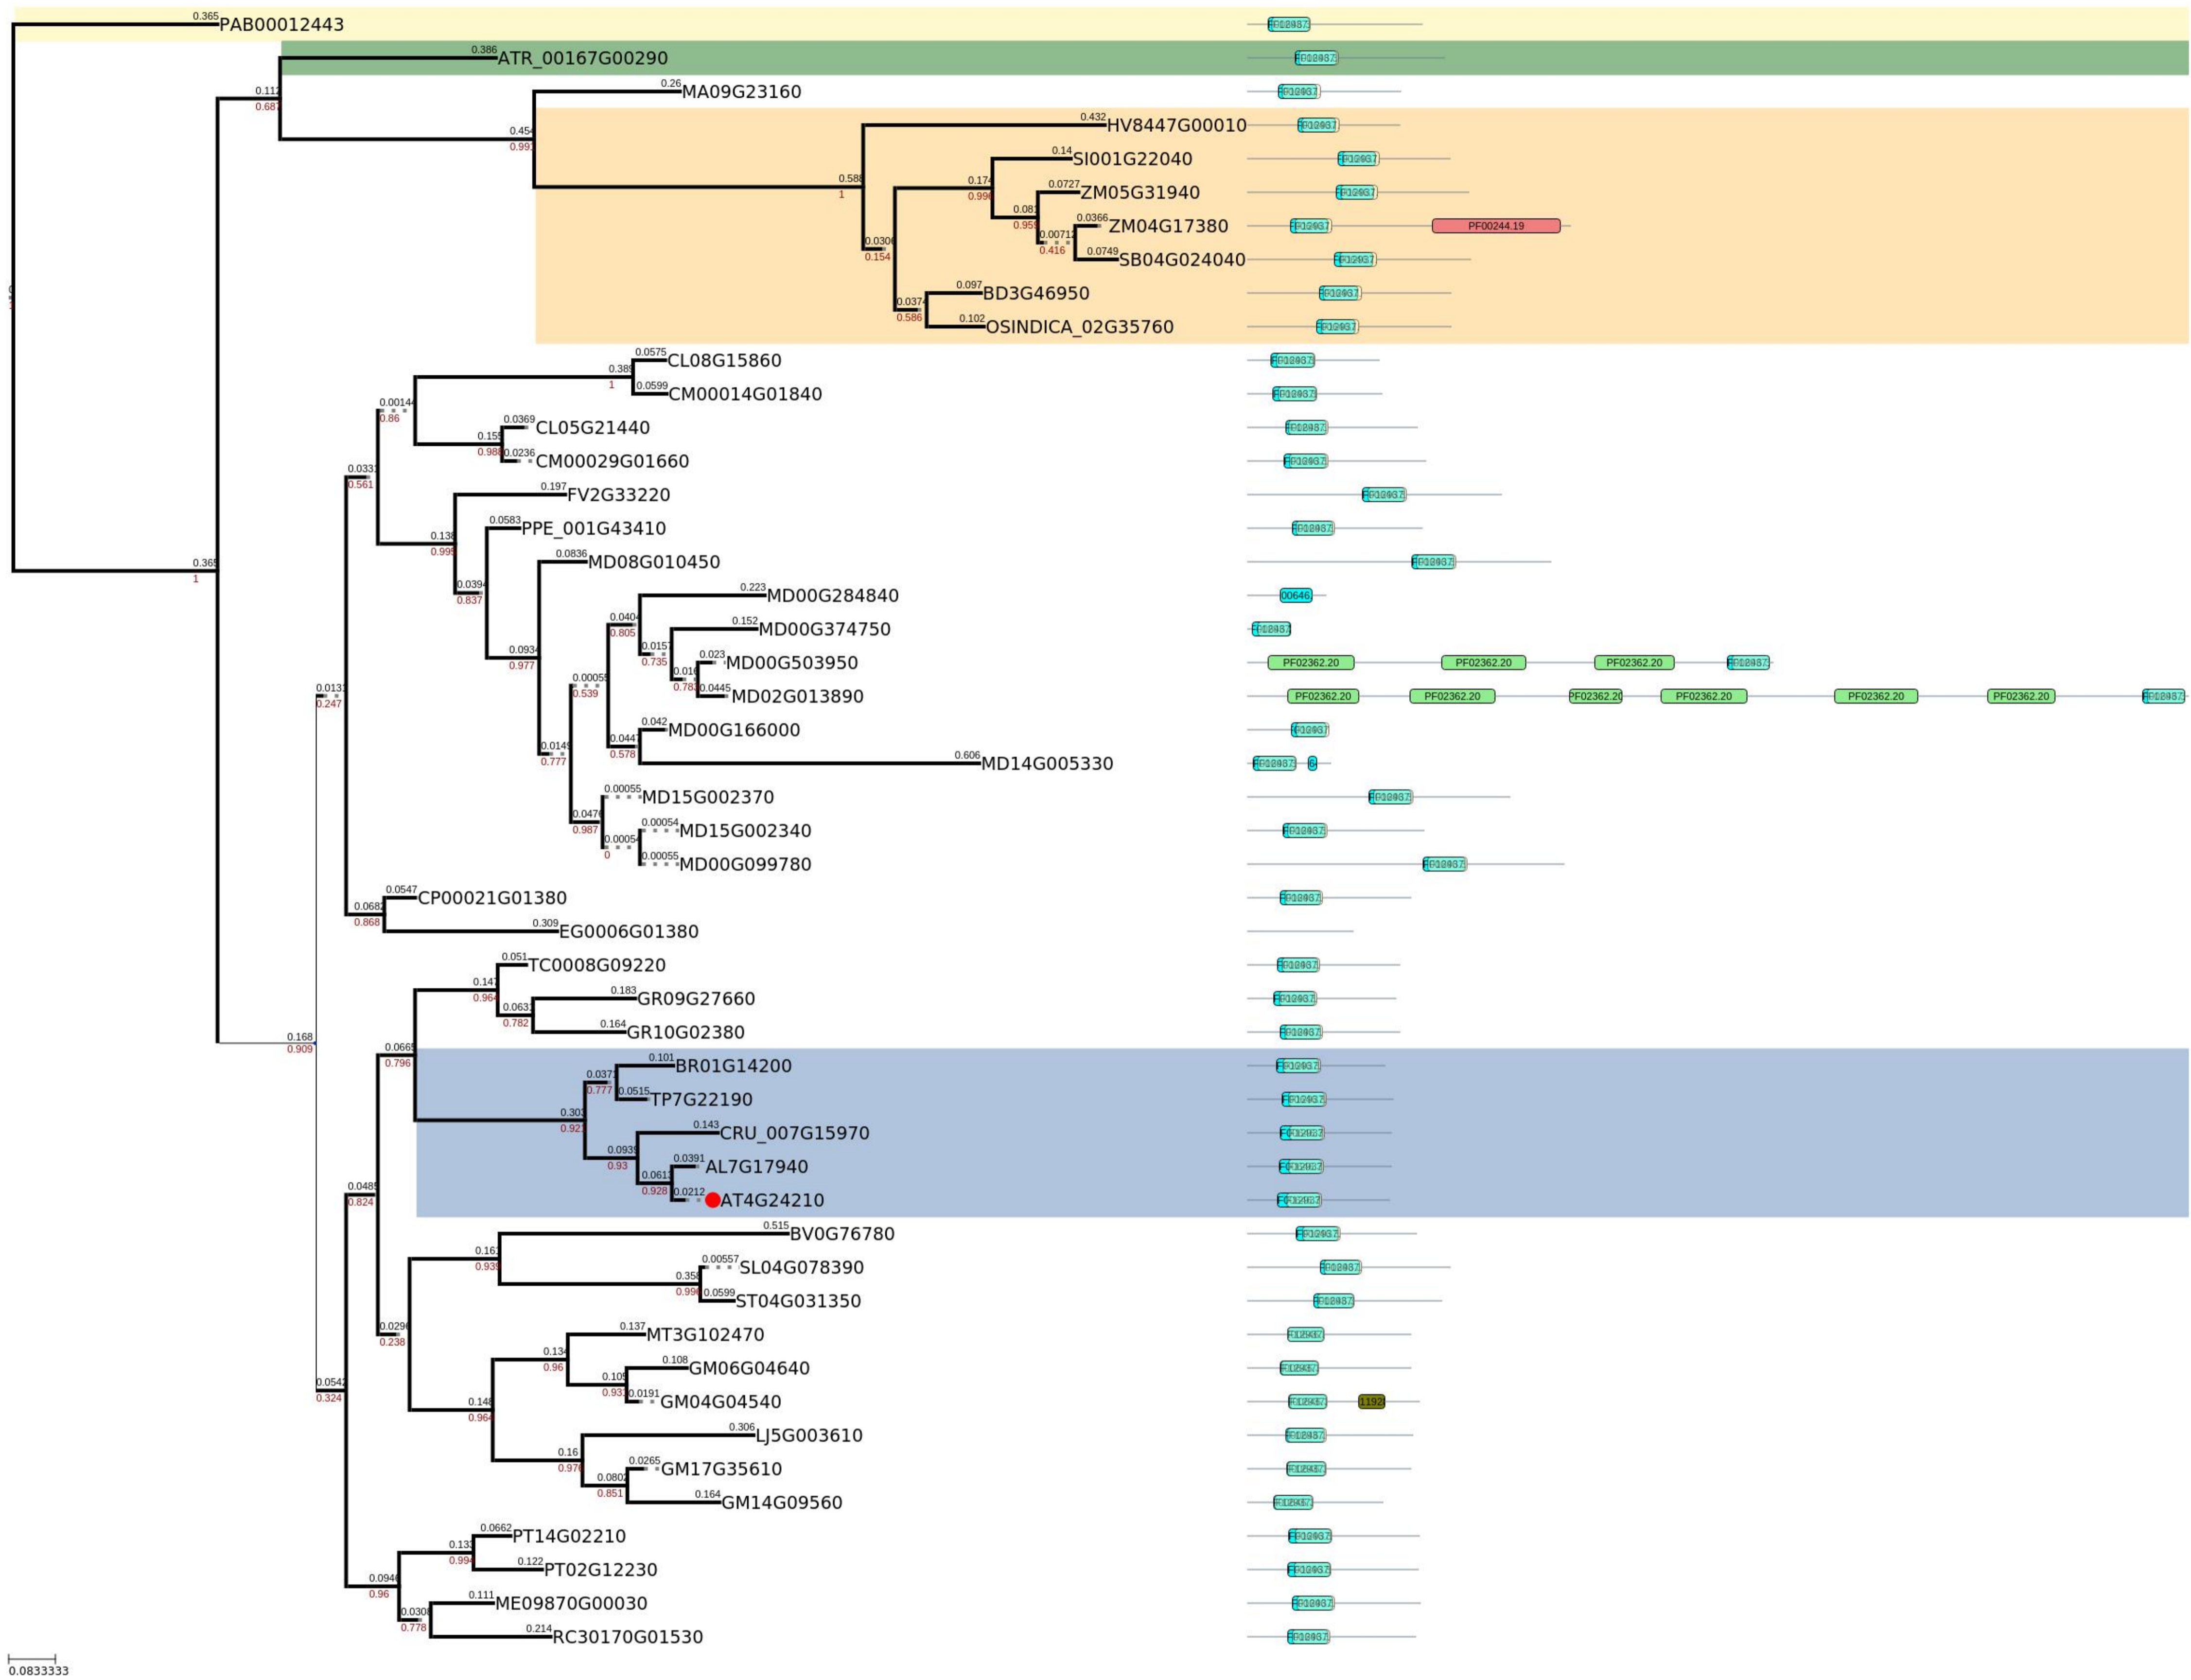

taxonpmc identity of protein domain architecture

|                             |                                              |  |
|-----------------------------|----------------------------------------------|--|
| <b>Poaceae</b>              | F_box_domain_PF00646_32                      |  |
|                             | F_box_like_PF12937_6                         |  |
| <b>Brassicales</b>          | 14_3_3_protein_PF00244_19                    |  |
|                             | B3_DNA_binding_domain_PF02362_20             |  |
| <b>Out group</b>            | Domain_of_unknown_function_DUF3446_PF11928_7 |  |
| <b>Amborella trichopoda</b> |                                              |  |



**Figure S50.** PhyML phylogenetic relations and composition of domains for AT4G38600 homologues of representative plant species. The color legends of species and domains is given below

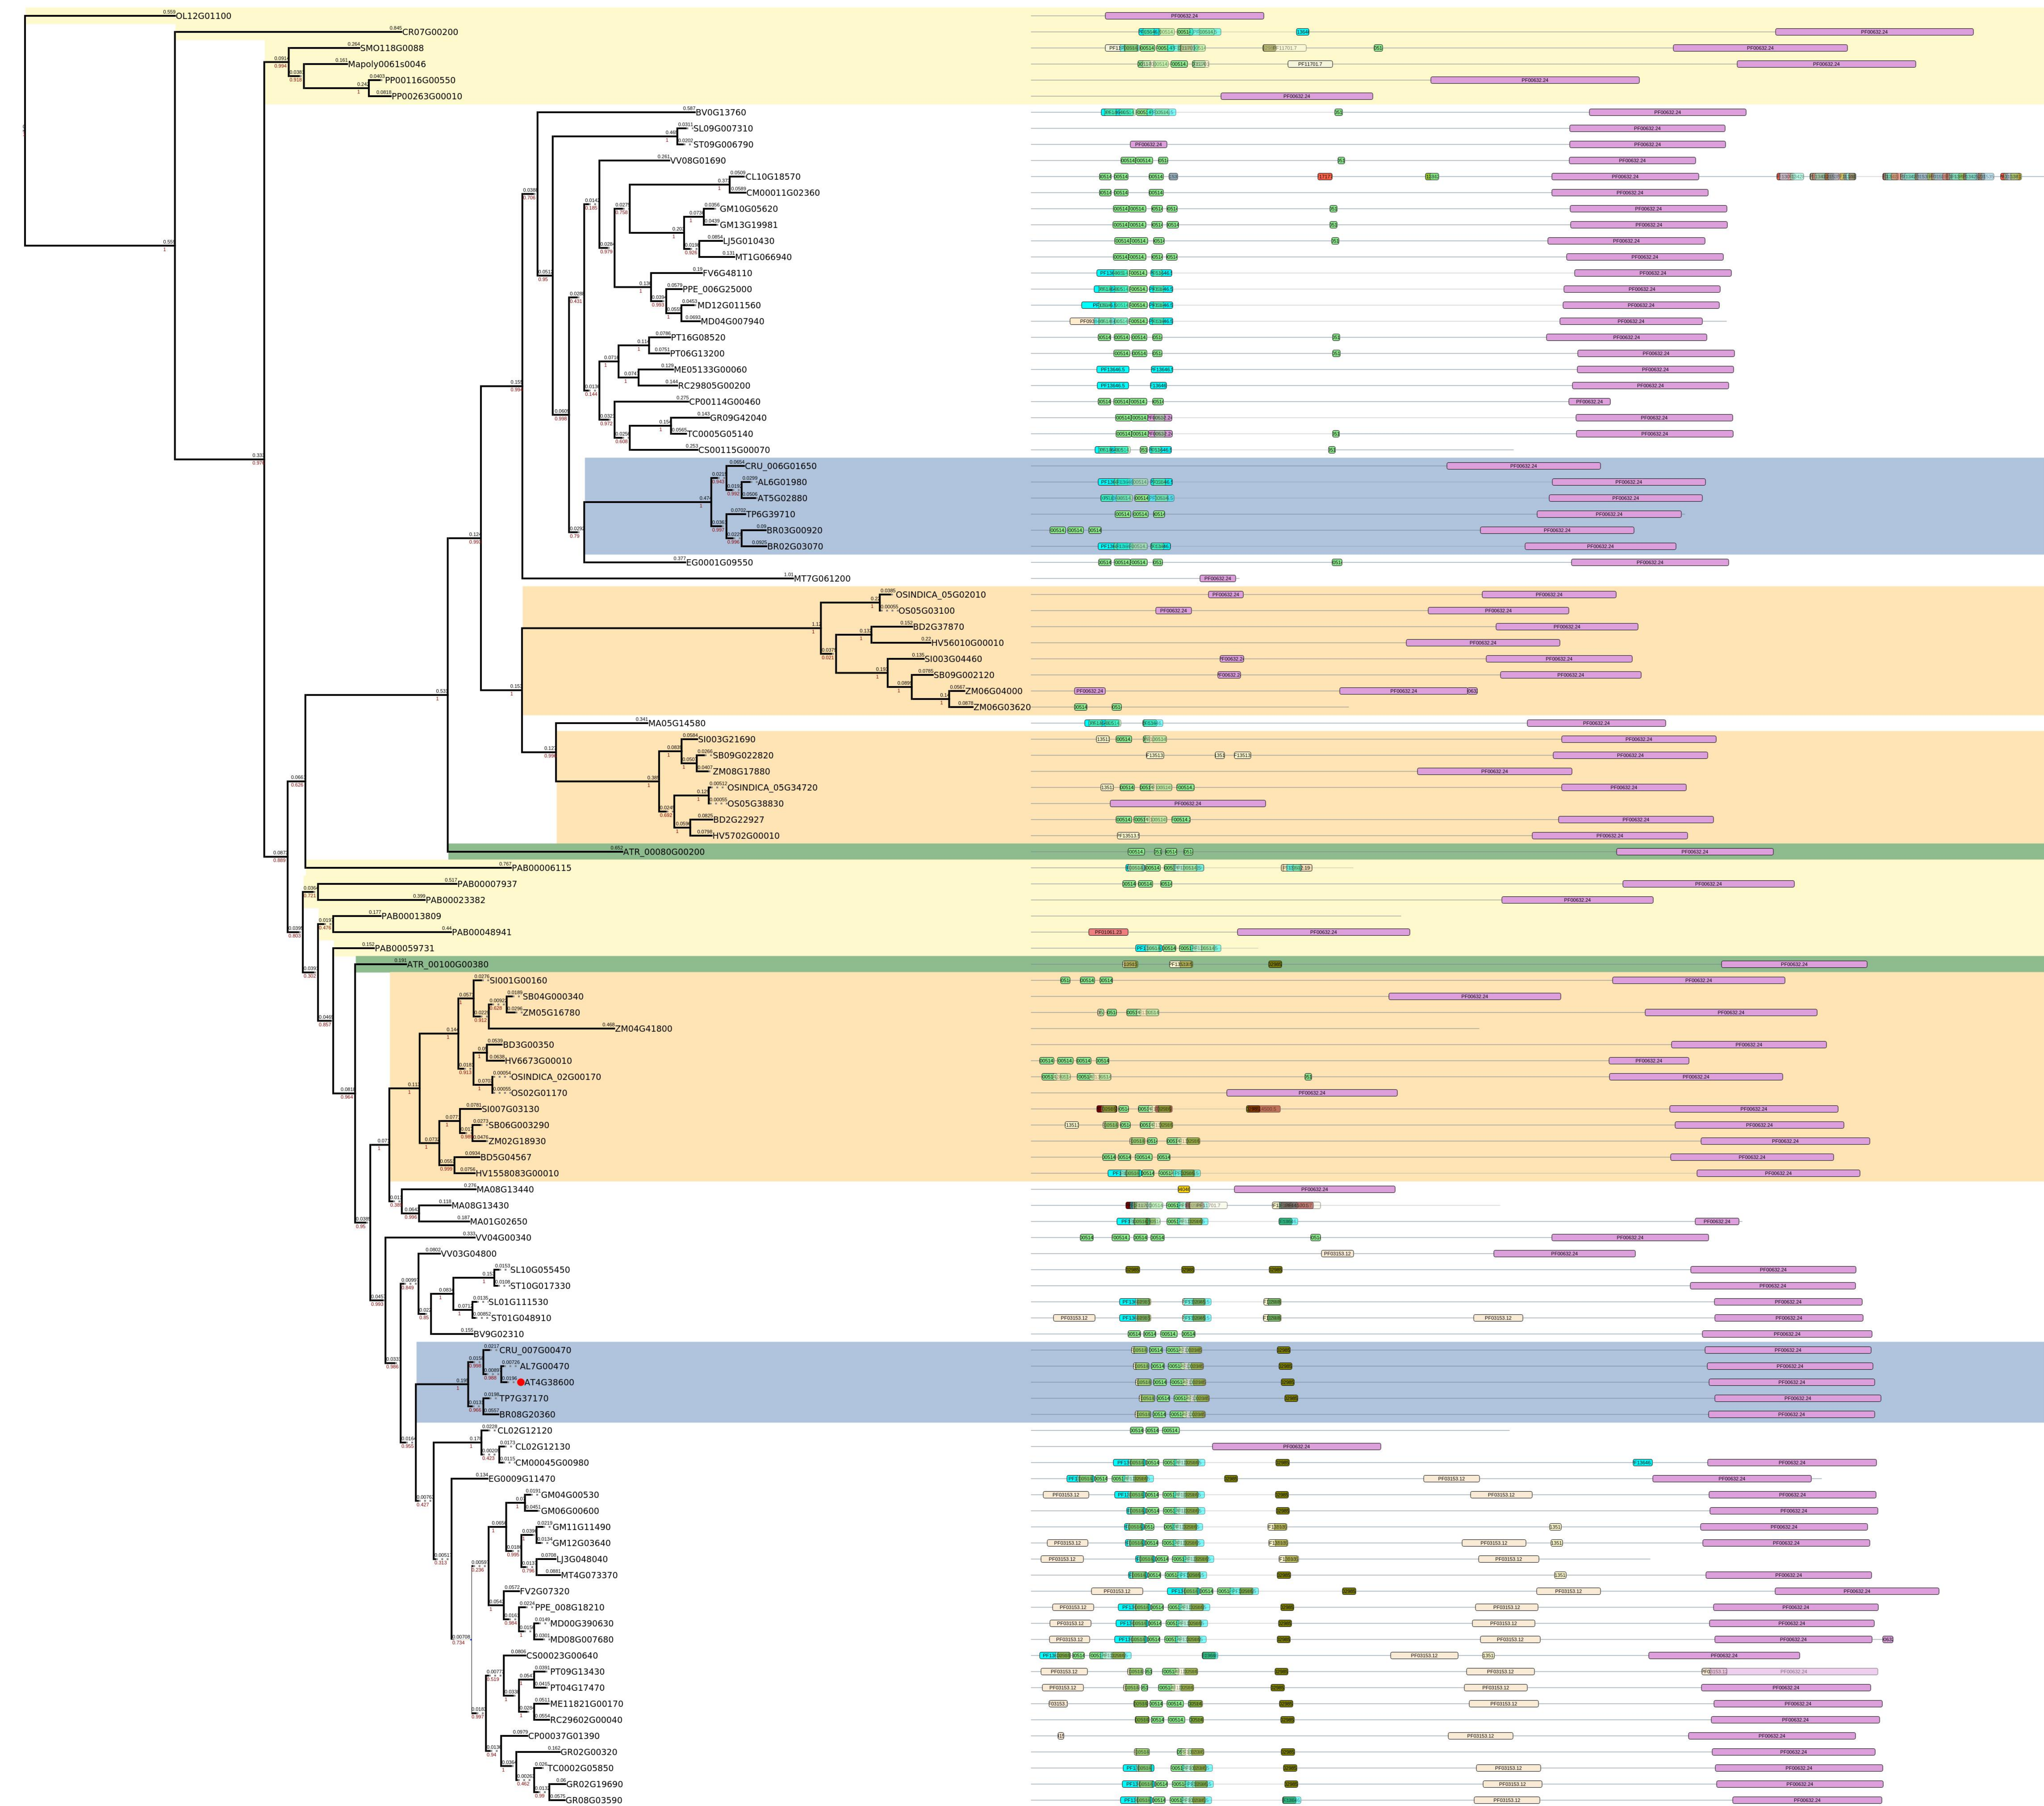

0.0833333

**taxonomic identity of protein**

|                             |                                                           |
|-----------------------------|-----------------------------------------------------------|
| <b>Poaceae</b>              | HECT_domain_ubiquitin_transferase_PF00632_24              |
| <b>Brassicales</b>          | Armadillo_beta_catenin_like_repeat_PF00514_22             |
| <b>Out group</b>            | HEAT_repeats_PF13646_5                                    |
|                             | HEAT_repeat_PF02985_21                                    |
| <b>Amborella trichopoda</b> | Myosin_binding_striated_muscle_assembly_central_PF11701_7 |
|                             | PPR_repeat_PF01535_19                                     |
|                             | PPR_repeat_PF12854_6                                      |
|                             | PPR_repeat_family_PF13041_5                               |

**domain architecture**

|                   |                                                                  |                   |                                                        |                   |
|-------------------|------------------------------------------------------------------|-------------------|--------------------------------------------------------|-------------------|
| <b>PF00632_24</b> | Pentatricopeptide_repeat_domain_PF13812_5                        | <b>PF03153_12</b> | PSP_PF04046_15                                         | <b>PF00632_24</b> |
| <b>PF00632_24</b> | Pentatricopeptide_repeat_region_of_PRORP_PF1717_3                | <b>PF03153_12</b> | Transcription_factor_IIA_alpha_beta_subunit_PF03153_12 | <b>PF00632_24</b> |
| <b>PF13646_5</b>  | Tetratricopeptide_repeat_PF13428_5                               | <b>PF00632_24</b> |                                                        | <b>PF00632_24</b> |
| <b>PF00632_24</b> | UTP15_C_terminal_PF09384_9                                       | <b>PF00632_24</b> |                                                        | <b>PF00632_24</b> |
| <b>PF11701_7</b>  | HEAT_like_repeat_PF13513_5                                       | <b>PF00632_24</b> |                                                        | <b>PF00632_24</b> |
| <b>PF00632_24</b> | Adaptin_N_terminal_region_PF01602_19                             | <b>PF00632_24</b> |                                                        | <b>PF00632_24</b> |
| <b>PF00632_24</b> | ABC_2_type_transporter_PF01061_23                                | <b>PF00632_24</b> |                                                        | <b>PF00632_24</b> |
| <b>PF13812_5</b>  | Dos2_interacting_transcription_regulator_of_RNA_Pol_II_PF14500_5 | <b>PF00632_24</b> |                                                        | <b>PF00632_24</b> |



**Figure S51.** PhyML phylogenetic relations and composition of domains for AT5G04470 homologues of representative plant species. The color legends of species and domains is given below

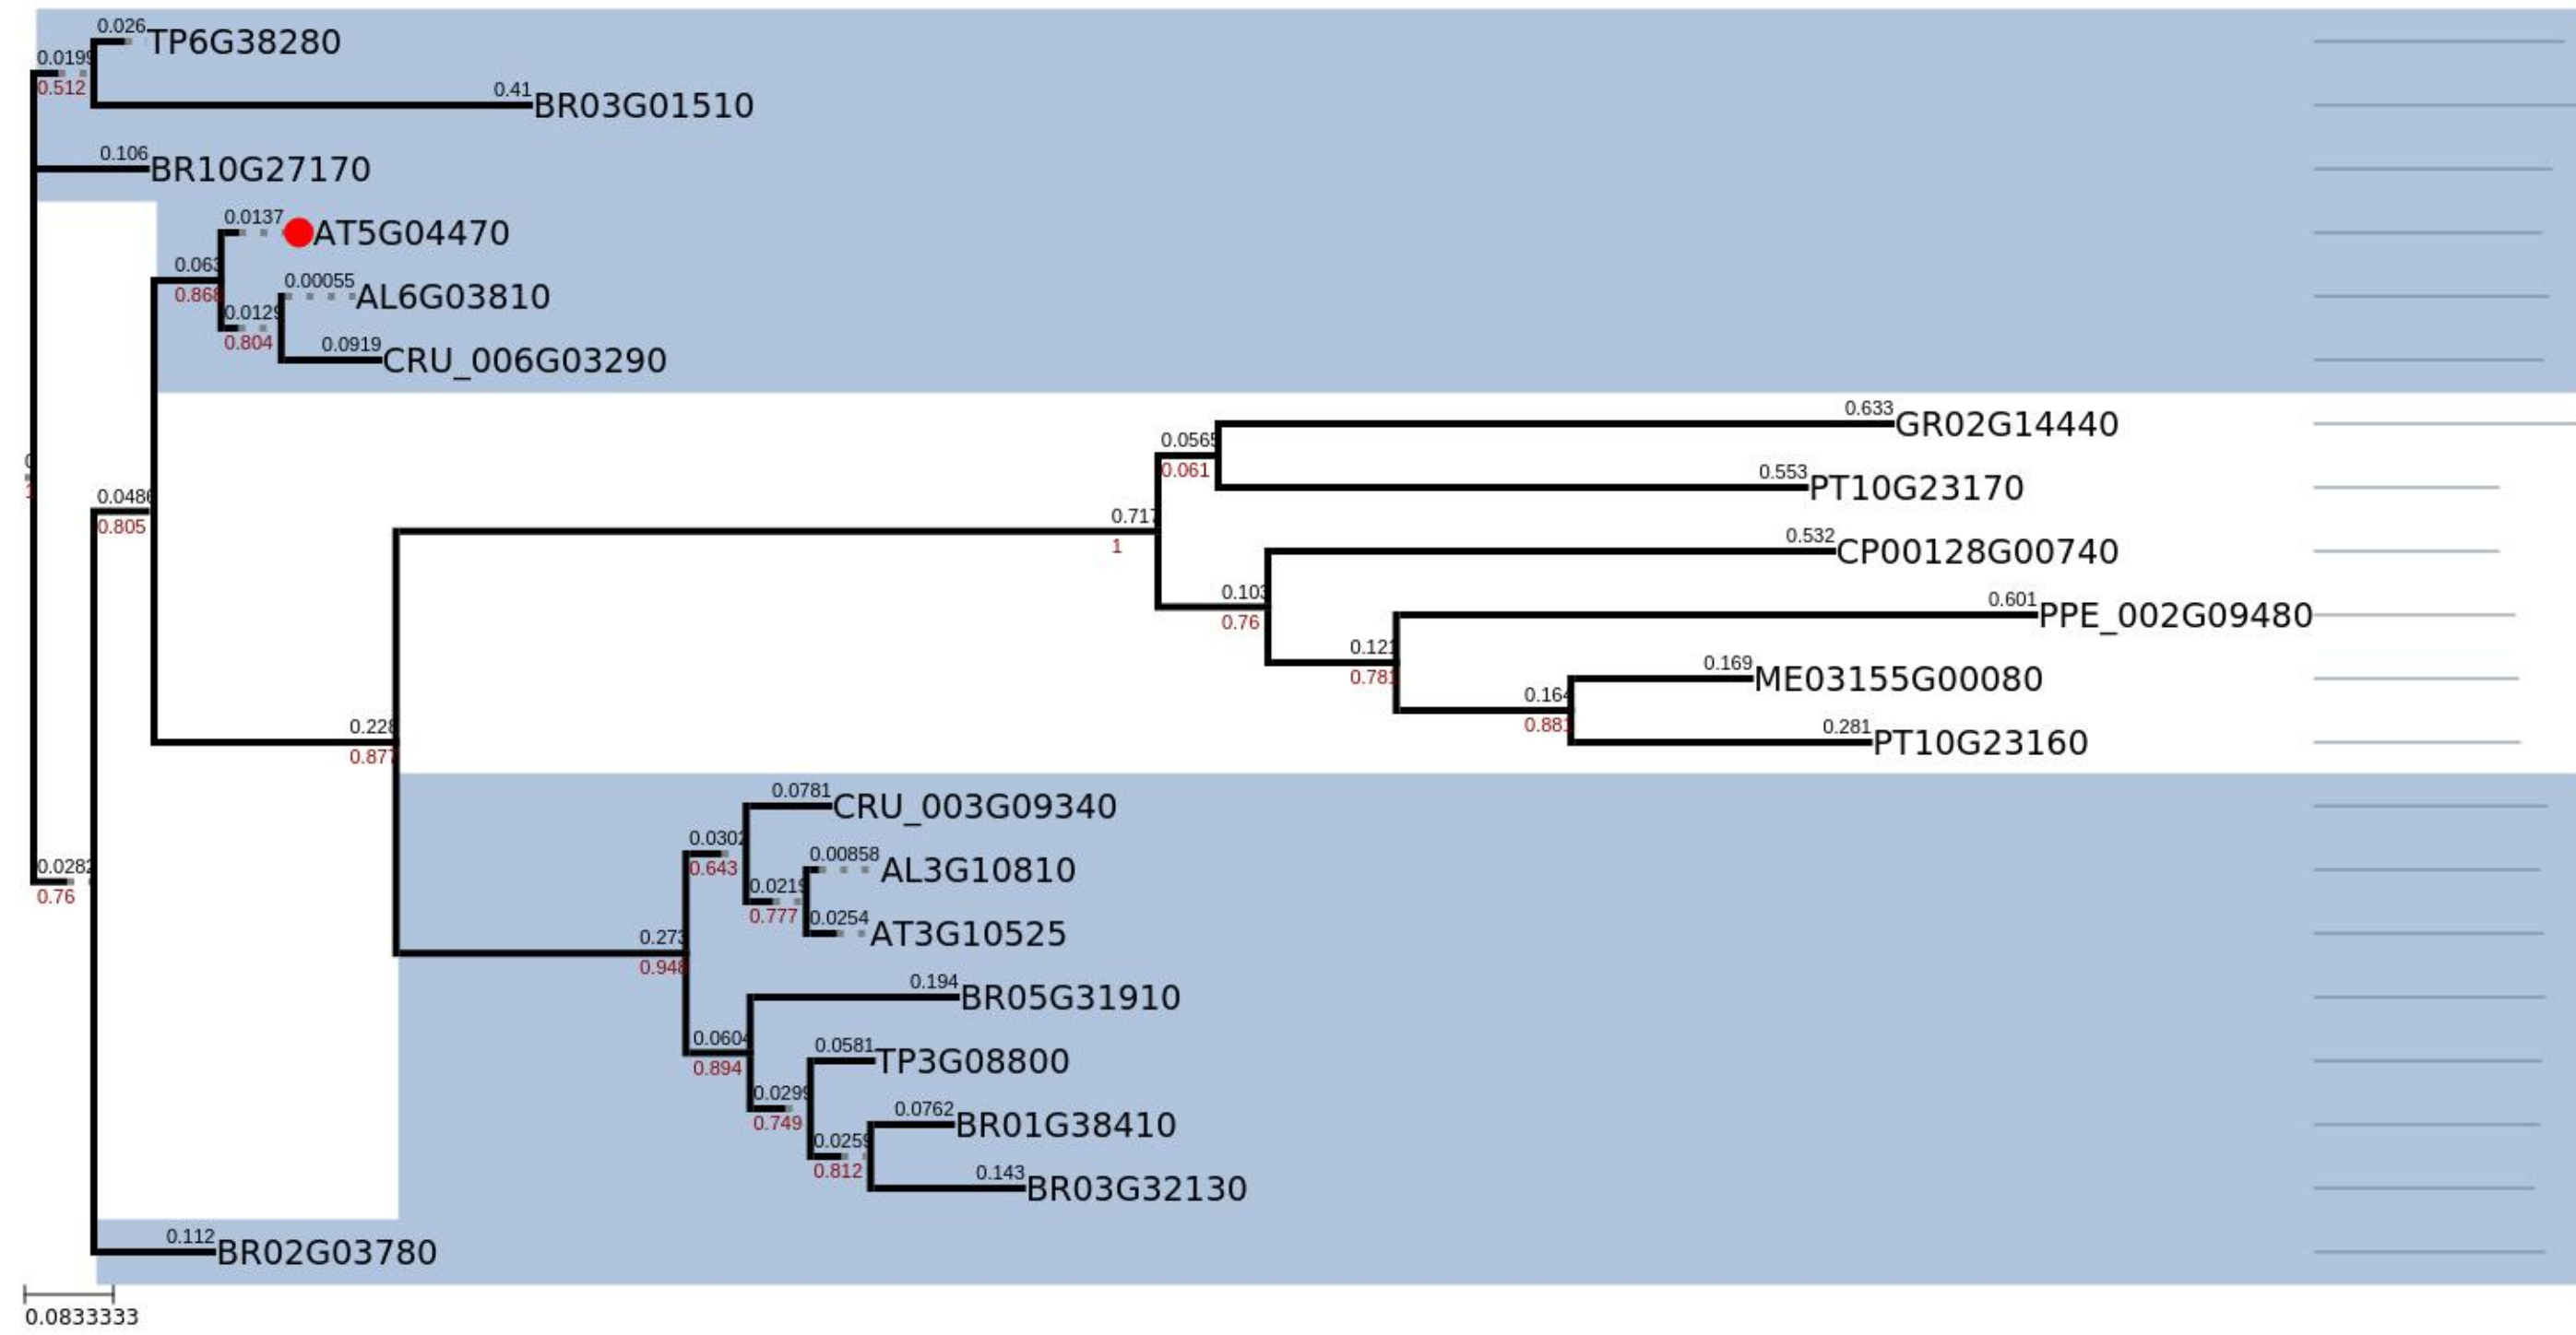

taxonpmic identity of protein    domain architecture

Poaceae

Brassicales

Out group

Amborella trichopoda



**Figure S52.** PhyML phylogenetic relations and composition of domains for AT5G06650, AT2G41940, AT3G58070 homologues of representative plant species. The color legends of species and domains is given below

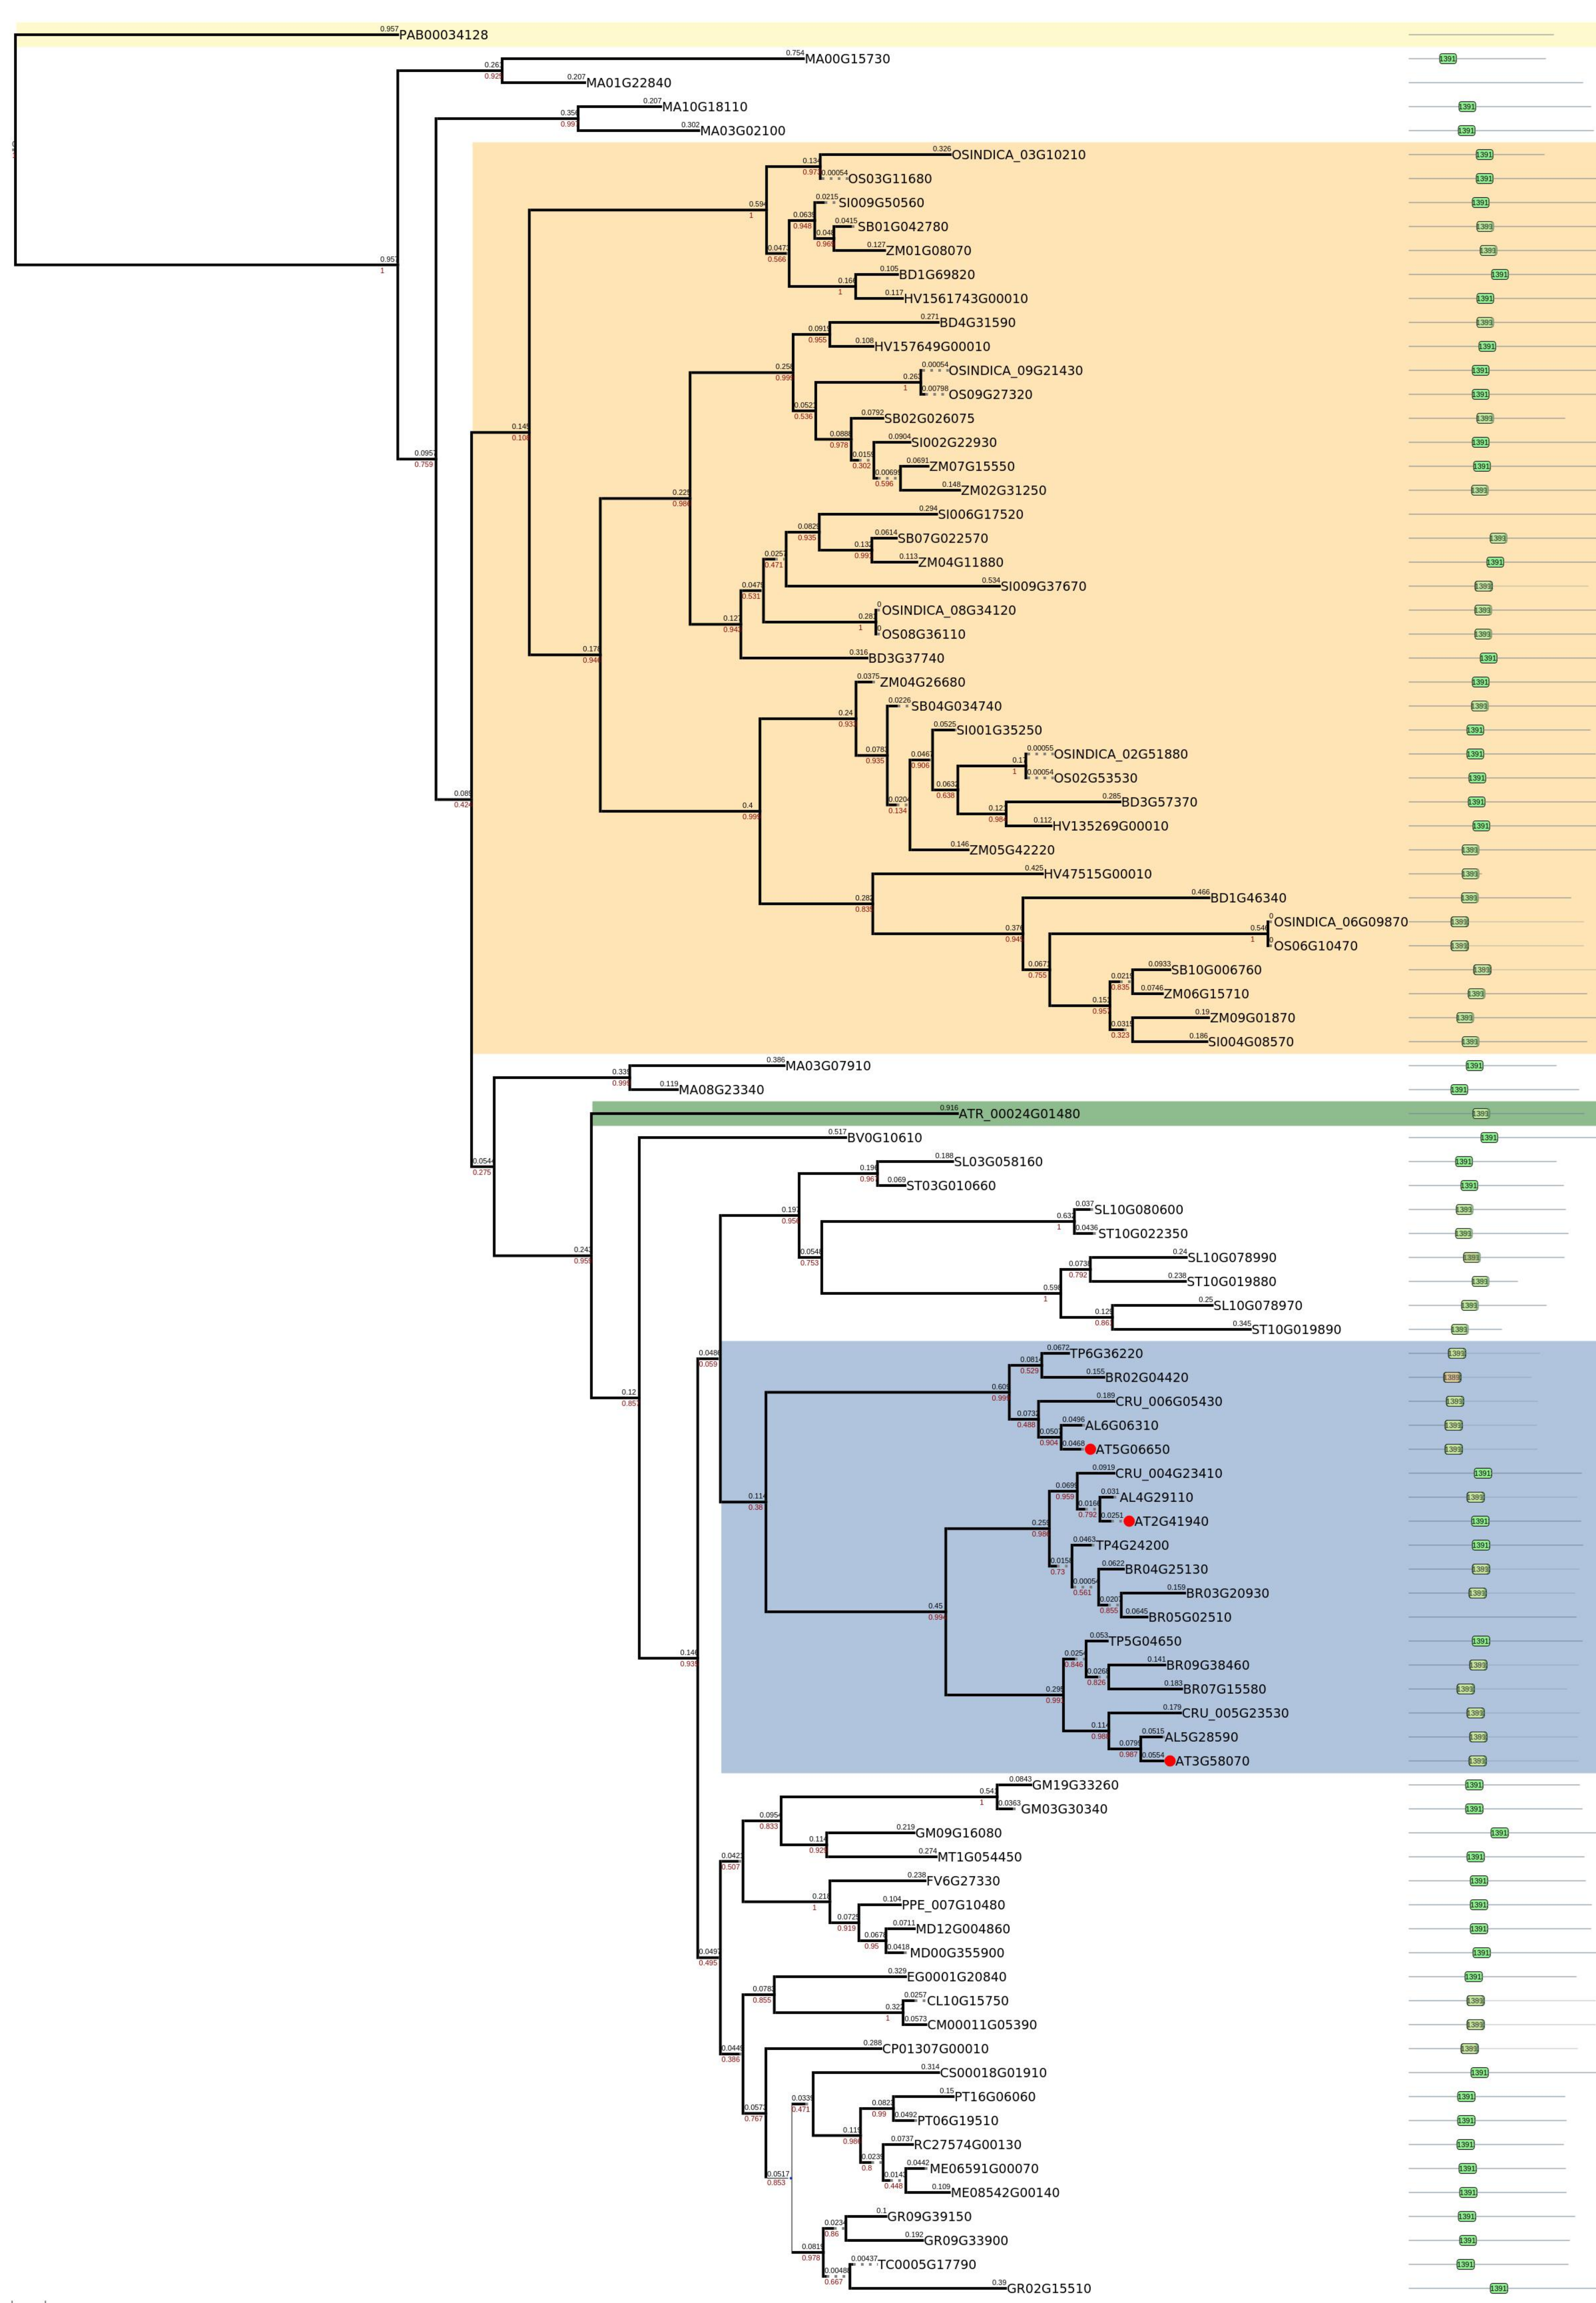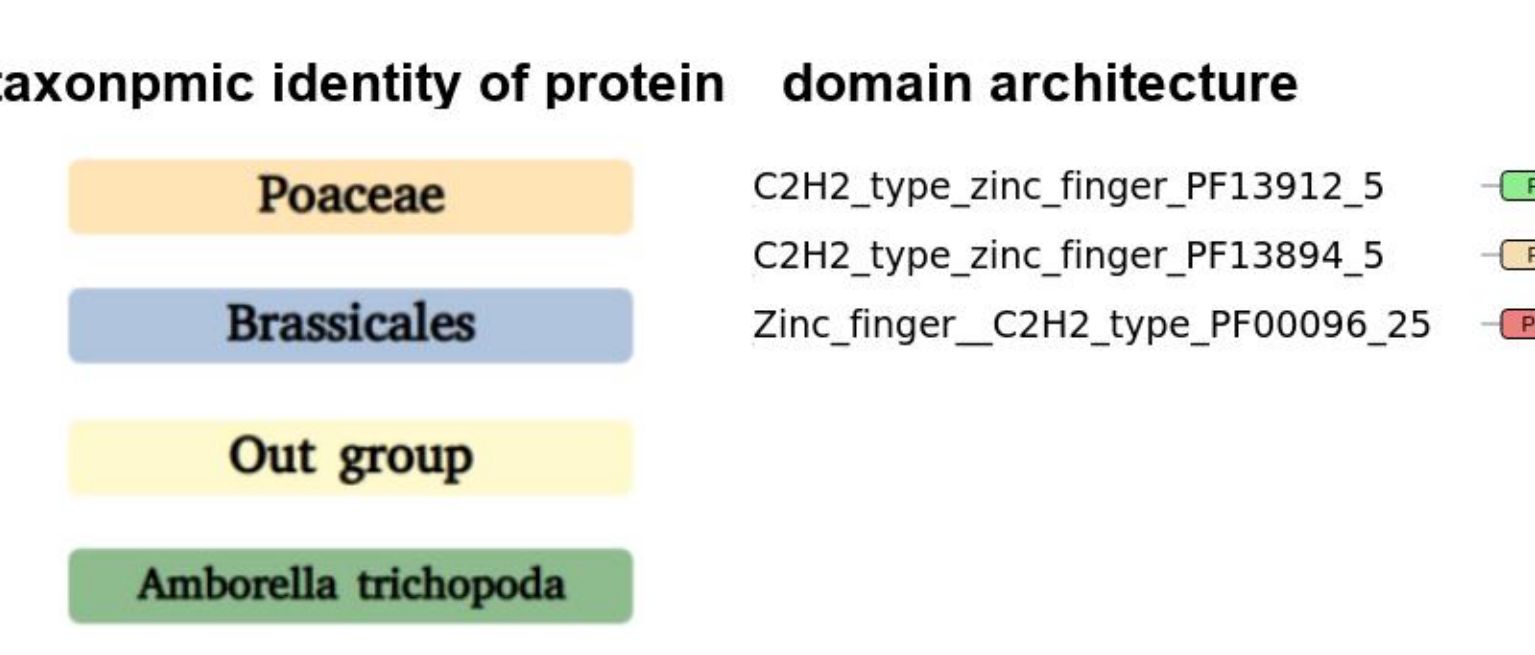



**Figure S53.** PhyML phylogenetic relations and composition of domains for AT5G18410 homologues of representative plant species.  
The color legends of species and domains is given below

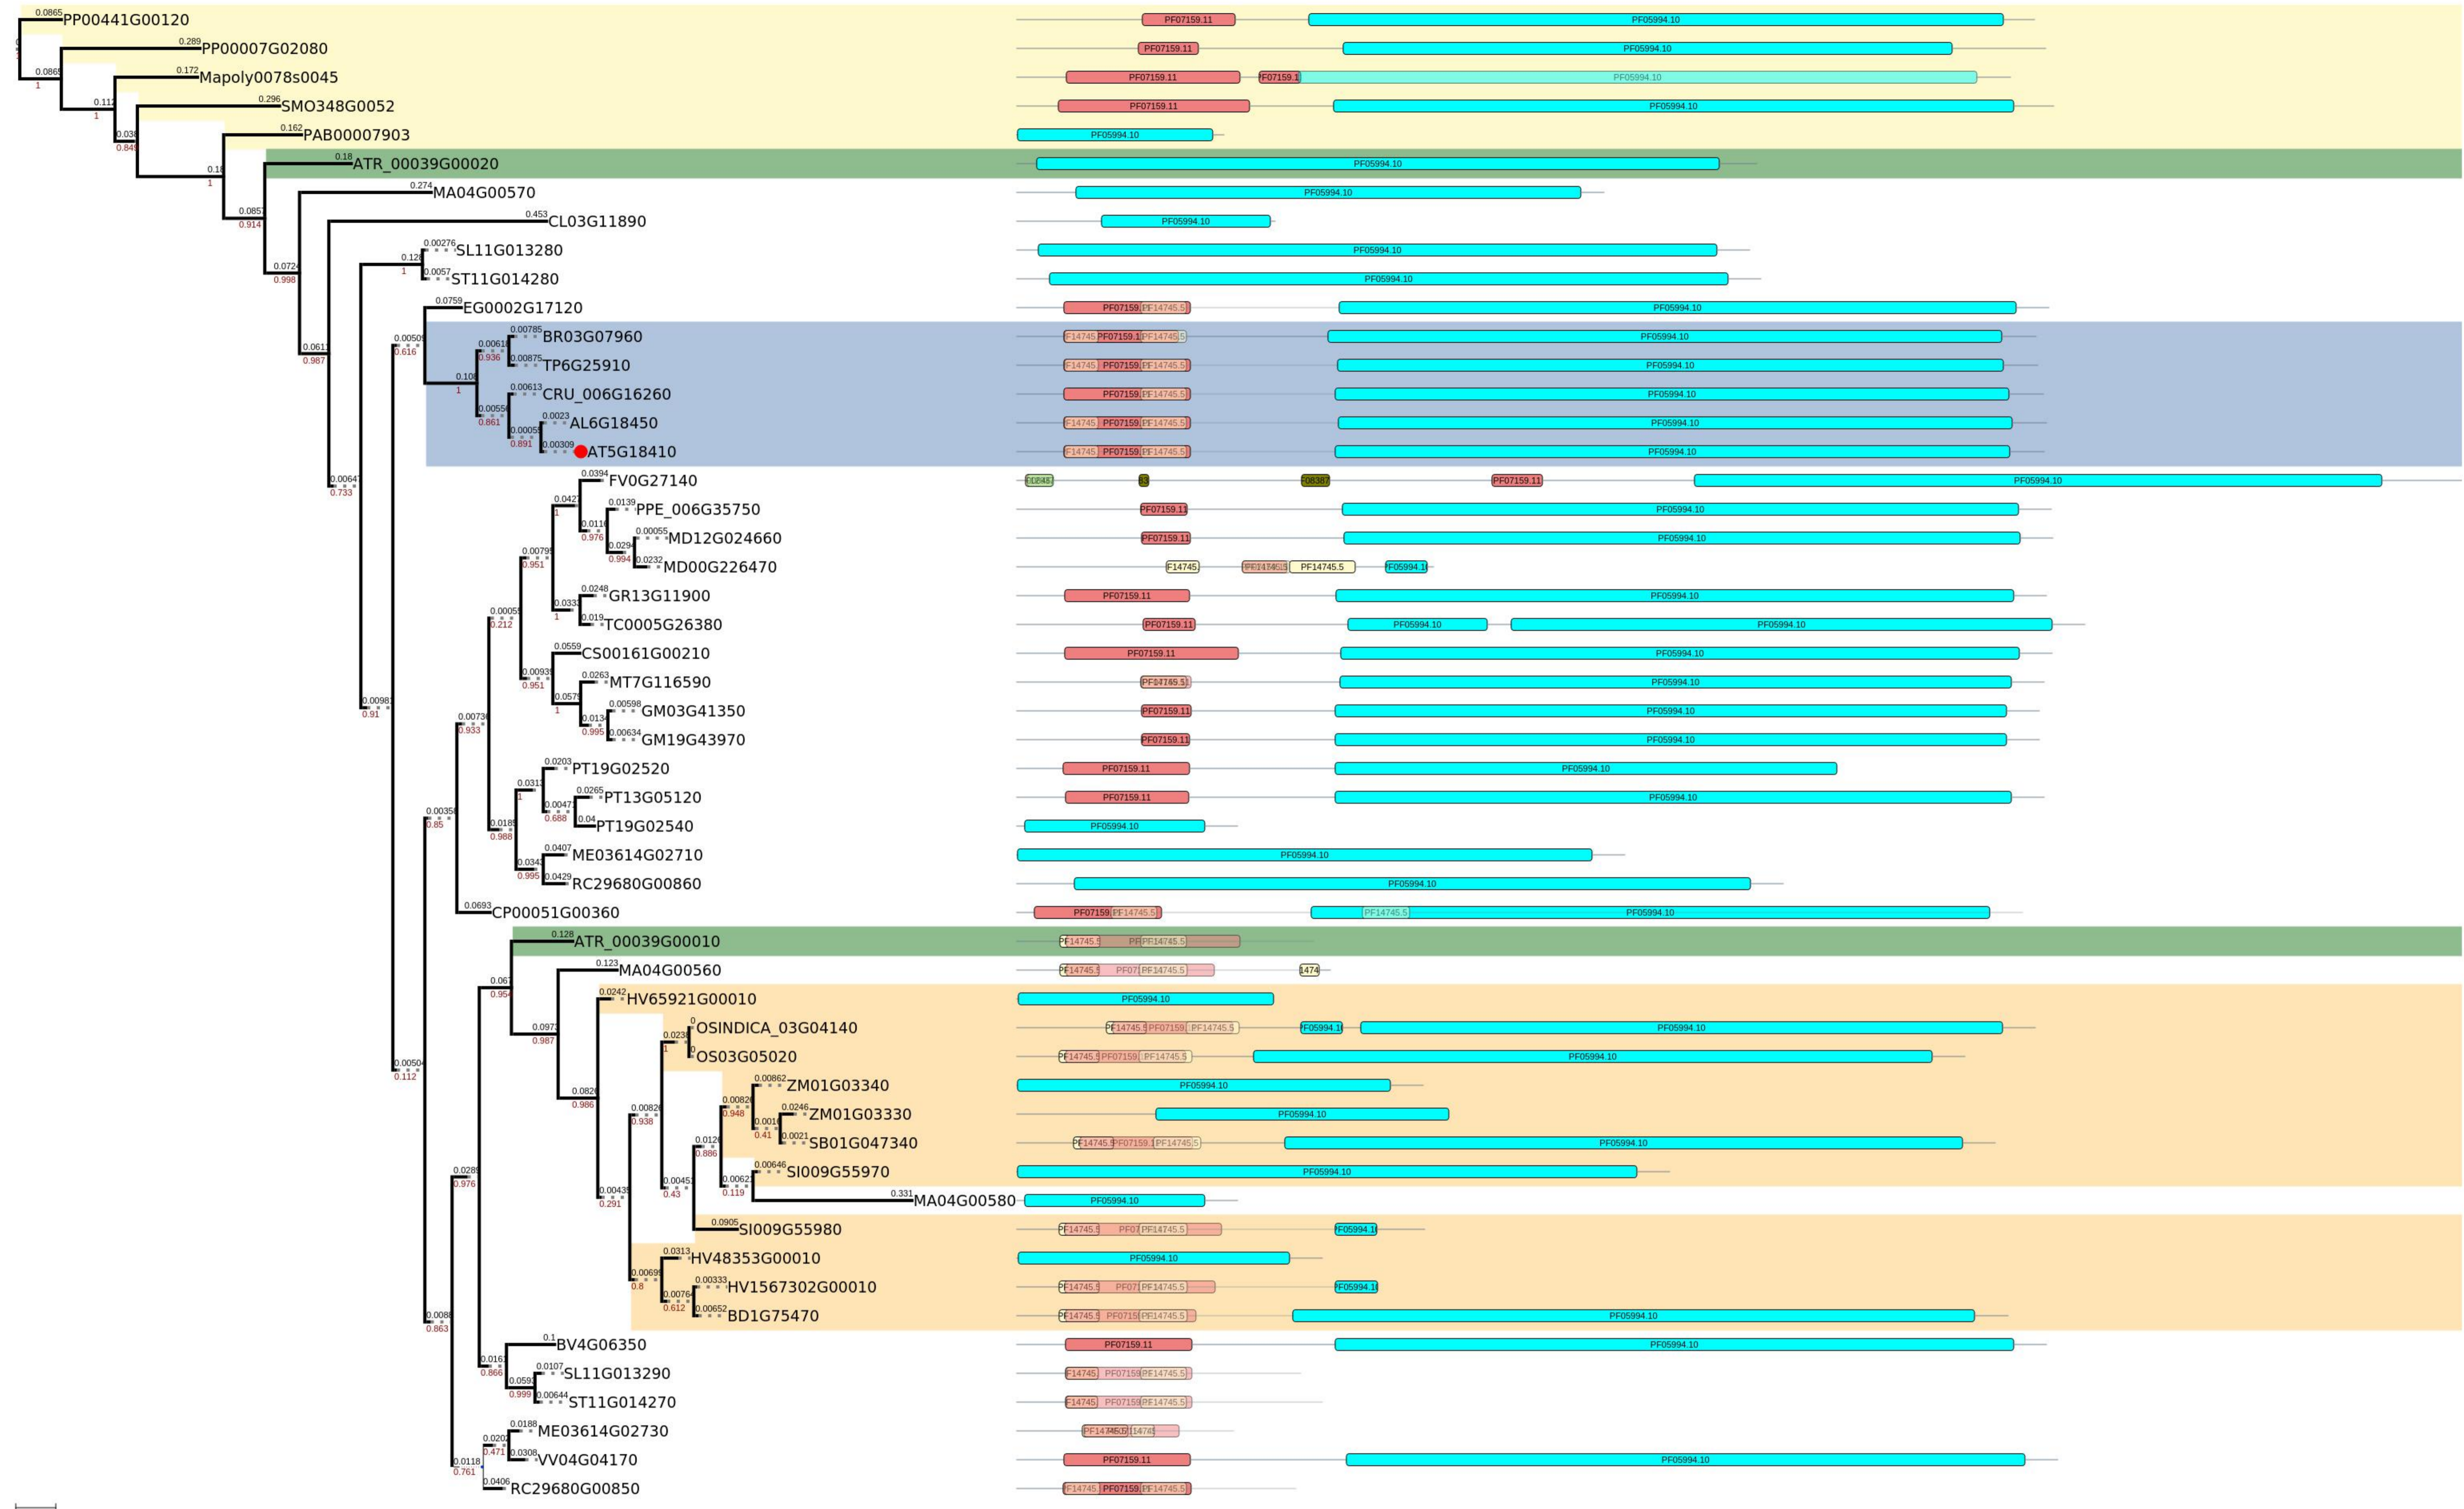

| taxonpmic identity of protein | domain architecture                                 |
|-------------------------------|-----------------------------------------------------|
| <b>Poaceae</b>                | Protein_of_unknown_function_DUF1394_PF07159_11      |
| <b>Brassicales</b>            | Cytoplasmic_Fragile_X_interacting_family_PF05994_10 |
| <b>Out group</b>              | WASH_complex_subunit_7_N_terminal_PF14745_5         |
|                               | F_box_domain_PF00646_32                             |
| <b>Amborella trichopoda</b>   | F_box_like_PF12937_6                                |
|                               | FBD_PF08387_9                                       |



**Figure S54.** PhyML phylogenetic relations and composition of domains for AT1G17580, AT5G20490 homologues of representative plant species. The color legends of species and domains is given below

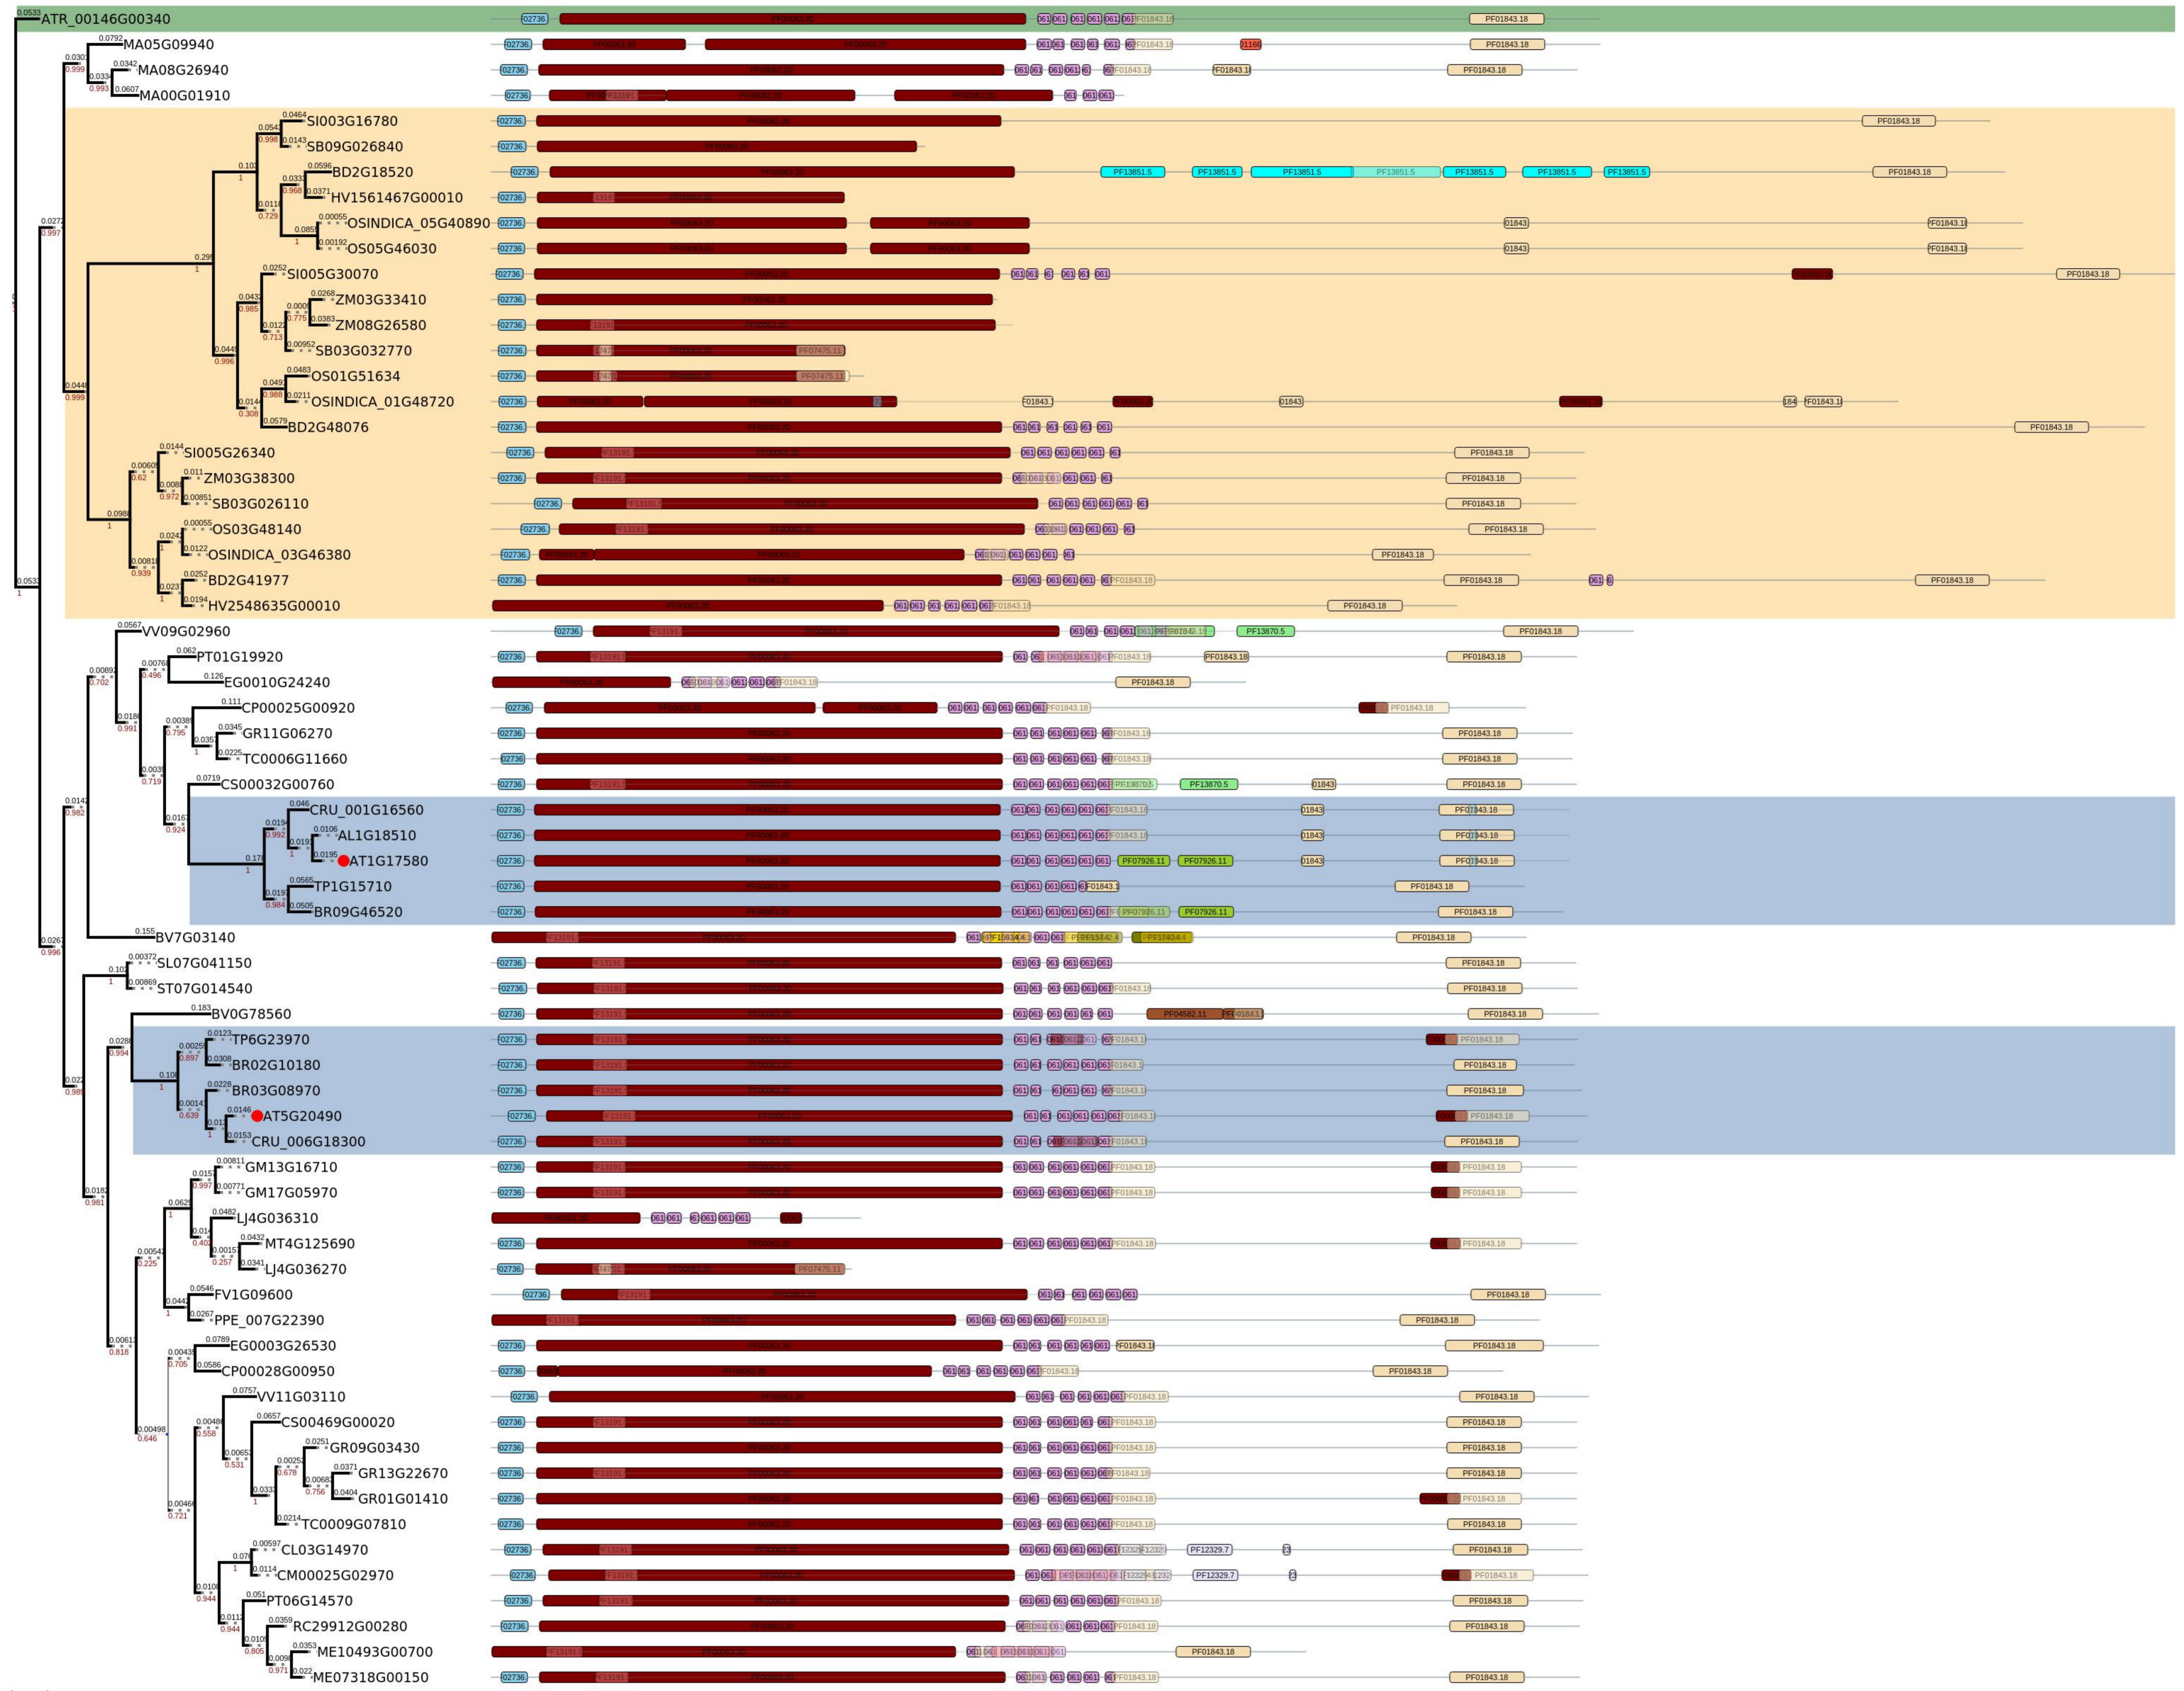

**taxonomic identity of protein**

- Poaceae**
  - DIL\_domain\_PF01843\_18
  - IQ\_calmodulin\_binding\_motif\_PF00612\_26
  - Myosin\_head\_motor\_domain\_PF00063\_20
  - Myosin\_N\_terminal\_SH3\_like\_domain\_PF02736\_18
- Brassicales**
  - TSC\_22\_dip\_bun\_family\_PF01166\_17
  - AAA\_ATPase\_domain\_PF13191\_5
  - Growth\_arrest\_specific\_micro\_tubule\_binding\_PF13851\_5
  - HPr\_Serine\_kinase\_C\_terminal\_domain\_PF07475\_11
- Out group**
- Amborella trichopoda**

**domain architecture**

- PF01843.18
- PF00612.26
- PF02736.18
- PF01166.17
- PF13191.5
- PF13851.5
- PF07475.11
- Domain\_of\_unknown\_function\_DUF4201\_PF13870\_5
- TPR\_MLP1\_MLP2\_like\_protein\_PF07926\_11
- Domain\_of\_unknown\_function\_DUF4686\_PF15742\_4
- Yuri\_gagarin\_PF15934\_4
- Reovirus\_sigma\_C\_capsid\_protein\_PF04582\_11
- TATA\_element\_modulatory\_factor\_1\_DNA\_binding\_PF12329\_7

- PF13870.5
- PF07926.11
- PF15742.4
- PF15934.4
- PF04582.11
- PF12329.7
